# Supplementary material for: PGG.SNV: understanding the evolutionary and medical implications of human single nucleotide variations in diverse populations
Source: Genome Biol. 2019 Oct 22;20:215. doi: 10.1186/s13059-019-1838-5 (PMC6805450; doi:10.1186/s13059-019-1838-5)
Supplement: Supplementary file 3 — Additional file 3: Table S2. The list of Mendelian-inherited disease variants with alternative allele frequency larger than 0.05 in PGG.SNV. [file 13059_2019_1838_MOESM3_ESM.xlsx]

## Sheet: Sheet1
chr	pos	ref	alt	rsid	genesymbol	type	name	phenotypelist	MAXPOP	MEAN	DIFF	CLNSIG	r_allele	nfe_est(gnomAD.exomes)	nfe_nwe(gnomAD.exomes)	nfe_seu(gnomAD.exomes)	nfe_onf(gnomAD.exomes)	afr(gnomAD.exomes)	amr(gnomAD.exomes)	asj(gnomAD.exomes)	eas(gnomAD.exomes)	eas_kor(gnomAD.exomes)	eas_jpn(gnomAD.exomes)	eas_oea(gnomAD.exomes)	fin(gnomAD.exomes)	nfe(gnomAD.exomes)	nfe_bgr(gnomAD.exomes)	nfe_swe(gnomAD.exomes)	sas(gnomAD.exomes)	oth(gnomAD.exomes)	afr(gnomAD.genomes)	amr(gnomAD.genomes)	asj(gnomAD.genomes)	eas(gnomAD.genomes)	fin(gnomAD.genomes)	nfe(gnomAD.genomes)	oth(gnomAD.genomes)	ACB(1KG_phase3)	ASW(1KG_phase3)	BEB(1KG_phase3)	CDX(1KG_phase3)	CEU(1KG_phase3)	CHB(1KG_phase3)	CHS(1KG_phase3)	CLM(1KG_phase3)	ESN(1KG_phase3)	FIN(1KG_phase3)	GBR(1KG_phase3)	GIH(1KG_phase3)
9	136505127	C	T	rs1611119	DBH	single nucleotide variant	NM_000787.3(DBH):c.486+13C>T	Dopamine beta hydroxylase deficiency	CEU(HapMap);CHD(HapMap);GIH(HapMap);JPT(HapMap);LWK(HapMap);MEX(HapMap);MKK(HapMap);TSI(HapMap)	0.102581	0.897419	Likely_benign	T	0.0555556	0.0658741	0.0555943	0.06027	0.0152228	0.0281992	0.0735294	0.0200392	0.0141509	0.0131579	0.0216727	0.0549599	0.0646717	0.0633536	0.0721313	0.0333857	0.0577931	0.016192	0.0330969	0.0689655	0.0198973	0.0563867	0.0620537	0.046875	0.0104167	0.0327869	0.0116279	0.0268817	0.0858586	0.0291262	0.0190476	0.0319149	0.00505051	0.0757576	0.043956	0.0145631
6	56507489	A	G	rs1024196	DST	single nucleotide variant	NM_001723.5(DST):c.98T>C (p.Leu33Ser)	Neuropathy, hereditary sensory and autonomic, type VI	Xuun(HuOrigin);MbutiPygmy(HGDP)	0.097316	0.864222	Benign	G	0.0247934	0.0482714	0.0249782	0.0371986	0.389798	0.037827	0.0502183	0.0225147	0.0146905	0	0.0248197	0.0132126	0.0379008	0.0146177	0.0301975	0.024046	0.0479765	0.384553	0.0390071	0.0275862	0.0224359	0.0112198	0.0373995	0.0552486	0.421875	0.377049	0.0232558	0.0268817	0.030303	0.0145631	0.0285714	0.0478723	0.444444	0.020202	0.0549451	0.0194175
6	56505063	A	G	rs2144407	DST	single nucleotide variant	NM_001723.5(DST):c.757T>C (p.Leu253=)	Neuropathy, hereditary sensory and autonomic, type VI	Xuun(HuOrigin)	0.117626	0.843913	Benign	G	0.0247934	0.0482396	0.0250391	0.0372474	0.389737	0.0378428	0.0501984	0.0225171	0.0146982	0	0.0248197	0.0132114	0.0379157	0.0146177	0.0301998	0.0242046	0.0478983	0.38474	0.0389151	0.0275862	0.0224936	0.0112198	0.0374238	0.0551471	0.421875	0.377049	0.0232558	0.0268817	0.030303	0.0145631	0.0285714	0.0478723	0.444444	0.020202	0.0549451	0.0194175
22	41564708	C	A	rs2294976	EP300	single nucleotide variant	NM_001429.3(EP300):c.4026-17C>A	not specified	Papuan(HGDP)	0.103305	0.837871	Benign	A	0.132231	0.0864947	0.110251	0.0947464	0.0252861	0.0465742	0.0770833	0.169278	0.196017	0.118421	0.162736	0.0880451	0.0918518	0.12397	0.0853173	0.114131	0.0912647	0.026062	0.057783	0.0896552	0.173299	0.0837651	0.0976922	0.0968635	0.0364583	0.0245902	0.0988372	0.150538	0.0808081	0.15534	0.190476	0.0638298	0.010101	0.116162	0.0549451	0.0776699
8	145639681	G	C	rs1871534	SLC39A4	single nucleotide variant	NM_130849.3(SLC39A4):c.1114C>G (p.Leu372Val)	Hereditary acrodermatitis enteropathica	YRI(1KG_phase3)	0.145342	0.836139	Benign	C	0	0.003016	0.010988	0.00467942	0.816358	0.0401396	0.0112711	5.69995e-05	0.000262192	0	0	0	0.00376073	0.00359138	0.000929443	0.000835306	0.0340433	0.795202	0.0520095	0.0103448	0	0	0.00312175	0.0581181	0.880208	0.762295	0.00581395	0	0	0	0	0.0851064	0.979798	0	0	0
22	51062832	G	A	rs8142033	ARSA	single nucleotide variant	NM_000487.5(ARSA):c.*741C>T	Metachromatic leukodystrophy	Karitiana(HuOrigin);Karitiana(HGDP)	0.16791	0.83209	Likely_benign	A	NA	NA	NA	NA	NA	NA	NA	NA	NA	NA	NA	NA	NA	NA	NA	NA	NA	0.222951	0.254717	0.1	0.176735	0.0463176	0.0711875	0.0919118	0.286458	0.221311	0.180233	0.129032	0.0959596	0.184466	0.161905	0.159574	0.308081	0.0454545	0.0769231	0.0970874
14	45606287	C	T	rs10138997	FANCM	single nucleotide variant	NM_020937.3(FANCM):c.524C>T (p.Ser175Phe)	Fanconi anemia;not specified	MbutiPygmy(HGDP)	0.14384	0.817699	Benign	T	0.053719	0.0512918	0.0634783	0.0590401	0.408235	0.0835454	0.069359	0.126142	0.143531	0.118421	0.12162	0.0877845	0.0580722	0.070412	0.0642753	0.12834	0.0805873	0.401151	0.0825472	0.0724138	0.114744	0.0894707	0.061754	0.102941	0.458333	0.418033	0.197674	0.102151	0.0353535	0.11165	0.12381	0.101064	0.505051	0.0959596	0.0494505	0.174757
10	72648336	C	T	rs827237	PCBD1	single nucleotide variant	NM_000281.3(PCBD1):c.-46G>A	BH4-Deficient Hyperphenylalaninemia	sas(gnomAD.exomes)	0.184167	0.815833	Likely_benign	T	NA	0.183962	0.5	0.193878	NA	0.5	NA	NA	NA	NA	NA	0.5	0.191083	NA	NA	1	0.25	0.0827305	0.182667	0.160839	0.0792526	0.24902	0.203178	0.204981	0.119792	0.106557	0.0988372	0.11828	0.217172	0.0631068	0.0761905	0.202128	0.0505051	0.212121	0.181319	0.101942
6	135606565	G	A	rs1052502	AHI1	single nucleotide variant	NM_017651.4(AHI1):c.*218C>T	Joubert syndrome	MbutiPygmy(HGDP)	0.185	0.815	Benign	A	NA	NA	NA	NA	NA	NA	NA	NA	NA	NA	NA	NA	NA	NA	NA	NA	NA	0.735856	0.117299	0.0655172	0.120026	0.0270737	0.0713081	0.116728	0.8125	0.655738	0.104651	0.155914	0.0606061	0.11165	0.114286	0.12234	0.909091	0.0353535	0.0879121	0.101942
5	7897283	G	A	rs12347	MTRR	single nucleotide variant	NM_002454.2(MTRR):c.1875G>A (p.Val625=)	Disorders of Intracellular Cobalamin Metabolism;not specified	Karitiana(HuOrigin)	0.187551	0.812449	Benign	A	0.0875	0.11594	0.130461	0.110479	0.387228	0.364741	0.170538	0.158802	0.124935	0.151316	0.167845	0.0751987	0.113582	0.0982009	0.107845	0.146119	0.139596	0.376698	0.300708	0.158621	0.156572	0.0765247	0.100221	0.134438	0.390625	0.303279	0.151163	0.0967742	0.171717	0.140777	0.166667	0.265957	0.474747	0.0858586	0.0989011	0.15534
22	51064416	T	C	rs2071421	ARSA	single nucleotide variant	NM_000487.5(ARSA):c.1055A>G (p.Asn352Ser)	ARYLSULFATASE A POLYMORPHISM;Metachromatic leukodystrophy;not provided;not specified	Karitiana(HuOrigin);Karitiana(HGDP)	0.19231	0.80769	Likely_benign	C	0.0896226	0.130988	0.151913	0.125823	0.336887	0.29846	0.140976	0.172803	0.184138	0.111111	0.169466	0.0630539	0.126932	0.117758	0.11116	0.148479	0.157767	0.323726	0.292453	0.121528	0.17825	0.0573157	0.110374	0.123845	0.411458	0.360656	0.186047	0.129032	0.141414	0.184466	0.166667	0.228723	0.393939	0.0606061	0.137363	0.11165
2	179631214	T	C	rs2291312	TTN	single nucleotide variant	TTN:c.9597A>G (p.Glu3199=)	Cardiovascular phenotype;Dilated Cardiomyopathy, Dominant;Distal myopathy Markesbery-Griggs type;Hereditary myopathy with early respiratory failure;Hypertrophic cardiomyopathy;Limb-Girdle Muscular Dystrophy, Recessive;Myopathy, early-onset, with fatal cardiomyopathy;not specified	Pima(HuOrigin)	0.161383	0.802902	Likely_benign	C	0.0454545	0.0710415	0.0546943	0.064125	0.082062	0.425638	0.0865766	0.23149	0.260021	0.177632	0.224556	0.107902	0.0691092	0.0524345	0.0801562	0.210413	0.12549	0.0837354	0.358491	0.0827586	0.217503	0.110759	0.0676604	0.0955882	0.0833333	0.139344	0.238372	0.188172	0.106061	0.223301	0.238095	0.239362	0.0707071	0.121212	0.0714286	0.174757
6	152777095	A	C	rs17082709	SYNE1	single nucleotide variant	NM_033071.3(SYNE1):c.2674T>G (p.Leu892Val)	Cerebellar ataxia;Emery-Dreifuss muscular dystrophy;not specified	Ju_hoan_North(HuOrigin)	0.064907	0.798729	Benign	C	0.0826446	0.0618628	0.0880716	0.0689154	0.0543866	0.035105	0.108929	0.000924415	0	0	0.00117859	0.0568245	0.066635	0.0794603	0.0607394	0.0454724	0.0609518	0.0513085	0.0377358	0.110345	0.00192555	0.0578584	0.0733005	0.0598527	0.046875	0.057377	0.0639535	0	0.040404	0.00485437	0.0047619	0.0425532	0.0353535	0.040404	0.0989011	0.0485437
16	53639438	C	T	rs3213758	RPGRIP1L	single nucleotide variant	NM_015272.4(RPGRIP1L):c.3790G>A (p.Asp1264Asn)	Joubert syndrome;Meckel-Gruber syndrome;Nephronophthisis;not provided;not specified	BTQ(AAGC)	0.085145	0.789855	Likely_benign	T	0.0619835	0.0550204	0.0472503	0.0522166	0.0129183	0.0675379	0.0616316	0.313268	0.277108	0.243421	0.323578	0.0441734	0.0531716	0.0479401	0.0543778	0.0665665	0.0601565	0.0106823	0.0884434	0.062069	0.297297	0.0454545	0.0535737	0.0607735	0.0104167	0.0491803	0.133721	0.408602	0.0606061	0.252427	0.290476	0.0478723	0	0.0555556	0.0549451	0.0728155
2	152467001	C	T	rs11902616	NEB	single nucleotide variant	NM_001271208.1(NEB):c.12018+29G>A	not specified	Papuan(HuOrigin)	0.14106	0.787512	Benign	T	0.025	0.0180379	0.0235065	0.0202213	0.327216	0.0249113	0.0613788	0.168584	0.136219	0.19403	0.177042	0.0153386	0.0180121	0.0184766	0.0128651	0.135917	0.0483817	0.312082	0.034279	0.0655172	0.157658	0.0149597	0.0198547	0.0469613	0.291667	0.344262	0.215116	0.188172	0.020202	0.150485	0.180952	0.0212766	0.388889	0.040404	0.010989	0.0970874
1	159174683	T	C	rs2814778	ACKR1	single nucleotide variant	NM_002036.3(ACKR1):c.-67T>C	DUFFY BLOOD GROUP SYSTEM, FY(a-b-) PHENOTYPE;Plasmodium vivax, resistance to;White blood cell count quantitative trait locus 1	ESN(1KG_phase3);GWD(1KG_phase3);LWK(1KG_phase3);MSL(1KG_phase3);YRI(HapMap)	0.219937	0.780063	Pathogenic	C	NA	NA	NA	NA	NA	NA	NA	NA	NA	NA	NA	NA	NA	NA	NA	NA	NA	0.827761	0.0545024	0.0206897	0	0.000863558	0.00311607	0.053407	0.885417	0.795082	0	0	0	0	0	0.0744681	1	0	0	0
4	128842761	G	A	rs3733319	MFSD8	single nucleotide variant	NM_152778.2(MFSD8):c.1268C>T (p.Ala423Val)	Neuronal Ceroid-Lipofuscinosis, Recessive;Seizures;not provided;not specified	Khomani(HuOrigin)	0.129481	0.77961	Likely_benign	A	0.00826446	0.0138	0.00791304	0.012987	0.183977	0.148927	0.00704505	0.265311	0.280922	0.315789	0.260646	0.0594512	0.0138478	0.017991	0.0171859	0.0101261	0.0471144	0.171186	0.115566	0.00344828	0.237147	0.0604143	0.0144486	0.0487132	0.161458	0.155738	0.0523256	0.231183	0.00505051	0.271845	0.266667	0.0797872	0.176768	0.0707071	0.010989	0.0242718
16	75590113	C	G	rs3743602	TMEM231	single nucleotide variant	NM_001077416.2(TMEM231):c.57G>C (p.Arg19=)	not specified	eas_jpn(gnomAD.exomes)	0.220632	0.779368	Benign	G	0.166667	0.23406	0.226568	0.2372	0.172016	0.116056	0.119181	0.240642	0.221884	1	0.248927	0.279869	0.244237	0.20045	0.268554	0.178839	0.225421	0.165861	0.127358	0.151724	0.252577	0.309689	0.26157	0.245856	0.145833	0.172131	0.186047	0.376344	0.222222	0.194175	0.247619	0.207447	0.166667	0.333333	0.263736	0.184466
1	207106478	G	A	rs291102	PIGR	single nucleotide variant	NM_002644.3(PIGR):c.1739C>T (p.Ala580Val)	Berger disease	Ju_hoan_North(HuOrigin)	0.176543	0.778002	Uncertain_significance	A	0.0165289	0.0239268	0.0317391	0.0273619	0.683245	0.214067	0.0957531	0.107679	0.128339	0.177632	0.10147	0.00411351	0.0246861	0.0179775	0.0203964	0.0420423	0.0695893	0.673312	0.182033	0.0655172	0.109254	0.00373993	0.0256743	0.0625	0.692708	0.581967	0.0523256	0.112903	0.030303	0.0873786	0.0809524	0.207447	0.833333	0.00505051	0.010989	0.038835
8	87660100	T	C	rs13265557	CNGB3	single nucleotide variant	NM_019098.4(CNGB3):c.919A>G (p.Ile307Val)	Achromatopsia;Stargardt Disease, Recessive;not specified	Onge(HuOrigin)	0.088331	0.775305	Likely_benign	C	0.0677966	0.0635538	0.0525578	0.0640272	0.0470254	0.0681911	0.0357499	0.0534451	0.0670347	0.125	0.0491053	0.0861862	0.0640659	0.0555556	0.0708039	0.109705	0.0669072	0.0489543	0.0727924	0.0137931	0.0397436	0.0860679	0.0693774	0.0701107	0.03125	0.0409836	0.139535	0.112903	0.0808081	0.0291262	0.0428571	0.0478723	0.040404	0.0808081	0.0659341	0.116505
5	7897191	C	T	rs10380	MTRR	single nucleotide variant	NM_002454.2(MTRR):c.1783C>T (p.His595Tyr)	Disorders of Intracellular Cobalamin Metabolism;Gastrointestinal stroma tumor;not specified	Karitiana(HGDP)	0.153654	0.774918	Benign	T	0.0785124	0.0972427	0.106264	0.0934119	0.335413	0.352842	0.150904	0.158322	0.125066	0.151316	0.167199	0.0698835	0.0951944	0.0771536	0.091139	0.138684	0.123775	0.328161	0.28266	0.137931	0.156572	0.0717166	0.0864126	0.113678	0.328125	0.270492	0.145349	0.0967742	0.141414	0.140777	0.166667	0.234043	0.419192	0.0757576	0.0769231	0.15534
14	45644589	G	T	rs1367580	FANCM	single nucleotide variant	NM_020937.3(FANCM):c.2632G>T (p.Val878Leu)	Fanconi anemia;not specified	MbutiPygmy(HGDP)	0.186749	0.774789	Benign	T	0.1	0.116903	0.125364	0.116567	0.354624	0.164286	0.140829	0.136932	0.166929	0.144928	0.128153	0.114642	0.116446	0.121423	0.111391	0.183828	0.13153	0.356008	0.154481	0.134483	0.127564	0.1178	0.122612	0.155617	0.390625	0.352459	0.244186	0.107527	0.116162	0.116505	0.142857	0.159574	0.469697	0.116162	0.17033	0.223301
9	2116037	G	A	rs6601	SMARCA2	single nucleotide variant	NM_003070.4(SMARCA2):c.3672G>A (p.Glu1224=)	Neurodevelopmental;Nicolaides-Baraitser syndrome;not specified	BiakaPygmy(HGDP)	0.153991	0.774581	Benign	A	0.0555556	0.111476	0.102866	0.102611	0.606342	0.0649275	0.0918612	0.0155926	0.0192816	0.06	0.0141608	0.0897721	0.104787	0.075188	0.100936	0.0997183	0.109252	0.598548	0.0908019	0.0862069	0.012837	0.0963751	0.0998183	0.113971	0.651042	0.52459	0.0930233	0.0215054	0.116162	0.00485437	0.0190476	0.106383	0.676768	0.0707071	0.0879121	0.0728155
17	76988192	C	T	rs4861	CANT1	single nucleotide variant	NM_138793.3(CANT1):c.*1440G>A	Desbuquois Dysplasia	Karitiana(HuOrigin)	0.192796	0.765538	Benign	T	NA	NA	NA	NA	NA	NA	NA	NA	NA	NA	NA	NA	NA	NA	NA	NA	NA	0.14762	0.332547	0.0965517	0.323681	0.0887097	0.119629	0.153493	0.171875	0.122951	0.290698	0.467742	0.126263	0.262136	0.380952	0.196809	0.181818	0.111111	0.137363	0.199029
12	133212582	G	A	rs5744990	POLE	single nucleotide variant	NM_006231.3(POLE):c.5707C>T (p.Leu1903=)	Hereditary cancer-predisposing syndrome;not provided;not specified	Karitiana(HGDP)	0.132374	0.760483	Benign	A	0.157025	0.15322	0.139387	0.156933	0.142708	0.22267	0.153449	0.110579	0.115889	0.0986842	0.109299	0.14674	0.157118	0.16979	0.170125	0.105864	0.163835	0.141676	0.188389	0.137931	0.102317	0.143351	0.16145	0.130515	0.15625	0.155738	0.0988372	0.11828	0.141414	0.092233	0.128571	0.223404	0.151515	0.106061	0.148352	0.0631068
8	145004042	C	A	rs11993782	PLEC	single nucleotide variant	NM_000445.4(PLEC):c.2821-45G>T	not specified	YRI(1KG_phase3)	0.162633	0.758663	Likely_benign	A	0.00510204	0.00633835	0.0128494	0.00746431	0.745351	0.0396938	0.00869565	0	0	0	0	0.00243902	0.00726572	0.00373134	0.00644425	0.000996479	0.032735	0.726747	0.057783	0.0103448	0	0.00172911	0.0076723	0.0441176	0.786458	0.704918	0	0	0	0.00485437	0	0.0797872	0.873737	0.00505051	0	0
5	145499996	C	T	rs10988	LARS	single nucleotide variant	NM_020117.10(LARS):c.3263G>A (p.Arg1088Lys)	not specified	Karitiana(HGDP)	0.20583	0.758456	Benign	T	0.280992	0.294722	0.217929	0.278865	0.0600739	0.455328	0.170412	0.218951	0.227512	0.236842	0.2165	0.313257	0.287906	0.234258	0.323978	0.175418	0.268725	0.0584042	0.42891	0.168966	0.207742	0.31394	0.291894	0.299263	0.03125	0.0737705	0.180233	0.188172	0.29798	0.228155	0.152381	0.287234	0.010101	0.29798	0.252747	0.208738
6	108243125	C	A	rs2064201	SEC63	single nucleotide variant	NM_007214.4(SEC63):c.340-12G>T	not specified	AA(ESP)	0.226327	0.756194	Benign	A	0.0170455	0.0163945	0.00542808	0.0137373	0.0404315	0.0184343	0.0111689	0.0289651	0.0186113	0	0.0322123	0.0125258	0.0116862	0.0035533	0.00535791	0.00957592	0.0221843	0.0133094	0.0121581	0.00367647	0.00131234	0.0592486	0.0115269	0.0229358	0.385417	0.311475	0.366279	0.38172	0.363636	0.378641	0.414286	0.340426	0.409091	0.373737	0.351648	0.368932
16	53721906	C	T	rs74393433	RPGRIP1L	single nucleotide variant	NM_015272.4(RPGRIP1L):c.530-29G>A	not specified	BTQ(AAGC)	0.119459	0.755541	Likely_benign	T	0.0625	0.0544376	0.046669	0.0519084	0.0202805	0.0676235	0.0609391	0.314607	0.276468	0.24	0.325515	0.0443097	0.0527912	0.0481203	0.0542567	0.0662895	0.0628931	0.0189568	0.0906921	0.062069	0.303089	0.0453495	0.053446	0.0626151	0.015625	0.0491803	0.133721	0.413978	0.0606061	0.247573	0.290476	0.0478723	0.00505051	0.0555556	0.0549451	0.0728155
16	4388139	G	A	rs653539	GLIS2	single nucleotide variant	NM_032575.2(GLIS2):c.*614G>A	Nephronophthisis	BTQ(AAGC)	0.162162	0.754505	Benign	A	NA	NA	NA	NA	NA	NA	NA	NA	NA	NA	NA	NA	NA	NA	NA	NA	NA	0.0929214	0.175708	0.062069	0.103093	0.115185	0.0933186	0.095941	0.0729167	0.106557	0.27907	0.150538	0.111111	0.0873786	0.0809524	0.143617	0.106061	0.121212	0.10989	0.325243
8	15622858	A	G	rs987926	TUSC3	single nucleotide variant	NM_006765.3(TUSC3):c.*1193A>G	Congenital disorder of glycosylation	Karitiana(HuOrigin);Karitiana(HGDP)	0.248042	0.751958	Likely_benign	G	NA	NA	NA	NA	NA	NA	NA	NA	NA	NA	NA	NA	NA	NA	NA	NA	NA	0.129881	0.413302	0.210345	0.280284	0.161578	0.22732	0.210332	0.119792	0.172131	0.127907	0.22043	0.267677	0.291262	0.280952	0.319149	0.131313	0.19697	0.252747	0.116505
12	48367976	C	T	rs2070739	COL2A1	single nucleotide variant	NM_001844.4(COL2A1):c.4213G>A (p.Gly1405Ser)	Stickler Syndrome, Dominant;Type II Collagenopathies;not specified	Pima(HGDP)	0.17685	0.751721	Likely_benign	T	0.0330579	0.0973709	0.0938098	0.0977349	0.0203617	0.392452	0.107837	0.390049	0.451545	0.513158	0.372469	0.140085	0.0979201	0.0838951	0.10287	0.13506	0.13127	0.0224925	0.287234	0.0965517	0.363695	0.132624	0.0934379	0.124081	0	0.0409836	0.168605	0.392473	0.10101	0.446602	0.419048	0.196809	0	0.111111	0.10989	0.101942
10	102016044	C	T	rs2270962	CWF19L1	single nucleotide variant	NM_018294.5(CWF19L1):c.479G>A (p.Cys160Tyr)	not specified	MbutiPygmy(HGDP)	0.172796	0.750281	Likely_benign	T	0.05	0.0630517	0.082087	0.0677386	0.528726	0.119108	0.0749305	0.151436	0.15715	0.197368	0.149438	0.122979	0.0657246	0.0685393	0.0603046	0.135351	0.106515	0.524747	0.114387	0.0689655	0.147436	0.122984	0.0725869	0.126617	0.5625	0.459016	0.133721	0.172043	0.040404	0.11165	0.171429	0.154255	0.641414	0.111111	0.0549451	0.150485
5	7885959	A	G	rs162036	MTRR	single nucleotide variant	NM_002454.2(MTRR):c.1049A>G (p.Lys350Arg)	Disorders of Intracellular Cobalamin Metabolism;Gastrointestinal stroma tumor;not specified	Karitiana(HGDP)	0.178549	0.750022	Benign	G	0.0867769	0.117193	0.132348	0.111886	0.393798	0.367388	0.170635	0.183375	0.157412	0.171053	0.190377	0.0752033	0.114871	0.101498	0.108594	0.146394	0.141414	0.38276	0.309693	0.159722	0.1875	0.0766571	0.100806	0.137454	0.401042	0.311475	0.151163	0.134409	0.171717	0.169903	0.204762	0.271277	0.474747	0.0909091	0.0989011	0.15534
2	152459116	G	A	rs774726264	NEB	single nucleotide variant	NM_001271208.1(NEB):c.13353C>T (p.Ala4451=)	not specified	fin(gnomAD.exomes)	0.25	0.75	Likely_benign	A	NA	NA	NA	NA	0	NA	NA	0	NA	NA	0	1	NA	NA	NA	NA	NA	NA	NA	NA	NA	NA	NA	NA	NA	NA	NA	NA	NA	NA	NA	NA	NA	NA	NA	NA
2	179606538	G	A	rs2627037	TTN	single nucleotide variant	NM_133379.4(TTN):c.*265+3509C>T	Cardiovascular phenotype;not specified	Taa_West(HuOrigin)	0.220027	0.748723	Benign	A	0.0672269	0.0766635	0.0620845	0.0698542	0.422525	0.446525	0.104117	0.233477	0.255096	0.174242	0.228386	0.109285	0.0742035	0.0667421	0.081503	0.212873	0.14501	0.41828	0.387173	0.106897	0.216969	0.112486	0.071577	0.116451	0.458333	0.442623	0.261628	0.188172	0.106061	0.23301	0.238095	0.281915	0.520202	0.121212	0.0769231	0.179612
19	17948732	T	C	rs3212752	JAK3	single nucleotide variant	NM_000215.3(JAK3):c.1701+9A>G	Severe Combined Immune Deficiency;not specified	Hadza(HuOrigin)	0.116157	0.747479	Benign	C	0.103306	0.0637613	0.0644993	0.0727466	0.23419	0.0556776	0.0418651	0.0563771	0.044264	0.0526316	0.0596229	0.0949455	0.0715931	0.0846442	0.0843728	0.0700287	0.0723127	0.229133	0.0566038	0.037931	0.0791506	0.0997693	0.082879	0.104244	0.28125	0.155738	0.0697674	0.0430108	0.0757576	0.0194175	0.0619048	0.106383	0.267677	0.126263	0.0989011	0.0776699
6	42665135	G	T	rs3176988	PRPH2	single nucleotide variant	NM_000322.4(PRPH2):c.*898C>A	Choroidal Dystrophy;Cone-Rod Dystrophy, Dominant;Patterned dystrophy of retinal pigment epithelium;Pigmentary retinal dystrophy;Retinitis Pigmentosa, Dominant;Vitelliform macular dystrophy	Papuan(HuOrigin)	0.220434	0.743852	Likely_benign	T	NA	NA	NA	NA	NA	NA	NA	NA	NA	NA	NA	NA	NA	NA	NA	NA	NA	0.238644	0.177305	0.186207	0.124839	0.213833	0.228415	0.232472	0.234375	0.229508	0.25	0.112903	0.232323	0.0970874	0.104762	0.196809	0.257576	0.20202	0.236264	0.228155
1	201328824	G	A	rs2275863	TNNT2	single nucleotide variant	NM_001001430.2(TNNT2):c.781-33C>T	not specified	Taa_West(HuOrigin)	0.226456	0.742294	Benign	A	0.10177	0.0944953	0.111772	0.105064	0.485924	0.0988705	0.138045	0.270548	0.24602	0.272059	0.276696	0.132338	0.0988862	0.0932741	0.0959869	0.204645	0.149586	0.46991	0.114929	0.134483	0.271208	0.127807	0.0992862	0.136029	0.505208	0.508197	0.27907	0.354839	0.0606061	0.262136	0.285714	0.12234	0.580808	0.121212	0.0769231	0.208738
19	36577742	G	A	rs77938609	WDR62	single nucleotide variant	NM_001083961.1(WDR62):c.1768+28G>A	not specified	Onge(HuOrigin)	0.124847	0.738789	Likely_benign	A	0.0384615	0.035317	0.0433455	0.040345	0.0269932	0.10176	0.068944	0.227083	0.200436	0.209459	0.234301	0.0373355	0.0397651	0.056926	0.0442834	0.204381	0.0678522	0.0242195	0.114387	0.0655172	0.227448	0.0328341	0.0394498	0.0716912	0.0260417	0.0327869	0.261628	0.241935	0.0252525	0.208738	0.195238	0.0691489	0.0252525	0.0454545	0.032967	0.223301
12	124110934	G	T	rs3704	EIF2B1	single nucleotide variant	NM_001414.3(EIF2B1):c.551+38C>A	not specified	Papuan(HGDP)	0.086121	0.737409	Benign	T	0.0661157	0.0447751	0.0416884	0.0488656	0.137139	0.0197338	0.047496	0.0917845	0.0699686	0.0131579	0.0983902	0.0465945	0.0486407	0.048012	0.0575774	0.118072	0.0494775	0.135967	0.0247642	0.062069	0.0924262	0.0448792	0.0509397	0.0535055	0.09375	0.114754	0.156977	0.11828	0.0353535	0.0728155	0.0904762	0.037234	0.151515	0.0555556	0.032967	0.169903
8	10480377	G	C	rs6601495	RP1L1	single nucleotide variant	NM_178857.5(RP1L1):c.335C>G (p.Thr112Ser)	Occult macular dystrophy	MSL(1KG_phase3)	0.121765	0.737058	Benign	C	0	0.00183267	0.00808745	0.00278355	0.674109	0.0343634	0.0138077	0	0	0	0	0	0.00237698	0.0012	0.000392003	0.00206192	0.0253841	0.666475	0.0625	0.0137931	0	0	0.00259538	0.0388889	0.734375	0.590164	0	0	0.00505051	0.00485437	0	0.0425532	0.818182	0	0	0
2	179571448	A	G	rs4893852	TTN	single nucleotide variant	NM_133378.4(TTN):c.25421T>C (p.Ile8474Thr)	Cardiovascular phenotype;Dilated Cardiomyopathy, Dominant;Distal myopathy Markesbery-Griggs type;Hereditary myopathy with early respiratory failure;Hypertrophic cardiomyopathy;Limb-Girdle Muscular Dystrophy, Recessive;Myopathy, early-onset, with fatal cardiomyopathy;not specified	Ju_hoan_North(HuOrigin)	0.128831	0.734806	Likely_benign	G	0.0371901	0.0262603	0.0210499	0.02711	0.203855	0.194159	0.0410231	0.0285491	0.00393082	0	0.0355355	0.056939	0.0269203	0.029744	0.0299505	0.168648	0.0622289	0.204159	0.170616	0.037931	0.0339744	0.0526467	0.0255347	0.0542279	0.213542	0.278689	0.197674	0.0430108	0.030303	0.0145631	0.00952381	0.170213	0.222222	0.0707071	0.032967	0.165049
8	68074137	G	A	rs16933182	CSPP1	single nucleotide variant	NM_024790.6(CSPP1):c.2615G>A (p.Arg872His)	not specified	Ju_hoan_North(HuOrigin)	0.130912	0.732725	Benign	A	0.0661157	0.028452	0.034643	0.0353002	0.313535	0.0873173	0.0436168	0.025315	0.0540115	0.0522388	0.0172315	0.120544	0.0338538	0.0412603	0.0394132	0.0863416	0.0589404	0.310559	0.0849057	0.0655172	0.021181	0.11707	0.0364509	0.0773481	0.338542	0.344262	0.122093	0.016129	0.040404	0.0194175	0.0190476	0.0638298	0.348485	0.111111	0.0164835	0.0728155
14	90429749	A	G	rs3825663	TDP1	single nucleotide variant	NM_018319.3(TDP1):c.291A>G (p.Gln97=)	Autosomal recessive cerebellar ataxia	Yoruba(HGDP)	0.149288	0.731664	Benign	G	0.0578512	0.0401849	0.0606614	0.0447409	0.72669	0.0894365	0.127706	0.0240839	0.0204295	0.0592105	0.0246811	0.0365662	0.0432656	0.0461019	0.0384174	0.107376	0.0798826	0.716751	0.0778302	0.131034	0.0250965	0.039148	0.0405598	0.0802583	0.776042	0.672131	0.0930233	0.0215054	0.0454545	0.038835	0.0333333	0.138298	0.873737	0.020202	0.021978	0.135922
14	94844843	T	G	rs1303	SERPINA1	single nucleotide variant	NM_001127701.1(SERPINA1):c.1200A>C (p.Glu400Asp)	Alpha-1-antitrypsin deficiency;PI M3;not specified	Onge(HuOrigin)	0.269714	0.730286	Likely_benign	G	0.219008	0.25411	0.287291	0.258227	0.109648	0.322497	0.266131	0.283951	0.24044	0.243421	0.295896	0.232262	0.25651	0.284108	0.242327	0.425203	0.274919	0.112694	0.340047	0.227586	0.284974	0.244092	0.244412	0.266605	0.0989583	0.114754	0.465116	0.360215	0.292929	0.315534	0.271429	0.31383	0.10101	0.212121	0.236264	0.461165
16	53671754	C	T	rs2111119	RPGRIP1L	single nucleotide variant	NM_015272.4(RPGRIP1L):c.3073G>A (p.Gly1025Ser)	Joubert syndrome;Meckel-Gruber syndrome;Nephronophthisis;not specified	BTQ(AAGC)	0.146423	0.728577	Likely_benign	T	0.0950413	0.0822495	0.0884253	0.0817816	0.158582	0.0904114	0.145693	0.320663	0.284067	0.236842	0.33123	0.0527921	0.080865	0.0877719	0.0734078	0.134638	0.100686	0.155093	0.111374	0.135417	0.308634	0.0527074	0.0773122	0.097786	0.166667	0.180328	0.174419	0.413978	0.0858586	0.252427	0.319048	0.0904255	0.171717	0.0707071	0.0879121	0.145631
1	169511734	T	C	rs4525	F5	single nucleotide variant	NM_000130.4(F5):c.2594A>G (p.His865Arg)	Budd-Chiari syndrome;Factor V deficiency;Thrombophilia due to activated protein C resistance;Venous thrombosis;not specified	Pima(HGDP)	0.271524	0.728476	Likely_benign	C	0.305785	0.274017	0.270528	0.267061	0.178523	0.415398	0.176804	0.221533	0.211064	0.203947	0.224487	0.212964	0.267582	0.272523	0.255721	0.329762	0.286065	0.177119	0.396919	0.196552	0.21887	0.214286	0.261135	0.253676	0.151042	0.245902	0.325581	0.322581	0.272727	0.165049	0.242857	0.351064	0.176768	0.19697	0.28022	0.320388
12	53205757	T	C	rs7959052	KRT4	single nucleotide variant	NM_002272.3(KRT4):c.467A>G (p.Gln156Arg)	White sponge nevus of cannon	Ju_hoan_North(HuOrigin)	0.206202	0.725616	Benign	C	0.177686	0.180488	0.162104	0.17164	0.576888	0.0925407	0.189456	0.095777	0.0467437	0.0447761	0.109784	0.165213	0.173766	0.164259	0.17131	0.173165	0.170277	0.568465	0.109929	0.170139	0.104891	0.157151	0.18053	0.176525	0.661458	0.581967	0.151163	0.177419	0.161616	0.0873786	0.0761905	0.175532	0.742424	0.111111	0.203297	0.169903
9	123731408	G	A	rs10985112	C5	single nucleotide variant	NM_001735.2(C5):c.4163-12C>T	not specified	Khomani(HuOrigin)	0.139475	0.724161	Benign	A	0.0454545	0.0809789	0.076193	0.0793188	0.477516	0.0906803	0.0662495	0.0446438	0.0246331	0.00657895	0.0503398	0.0157102	0.0779129	0.0617978	0.0740202	0.0810625	0.0820822	0.467594	0.103774	0.0689655	0.0437018	0.0138329	0.0644367	0.0652574	0.479167	0.42623	0.0755814	0.0268817	0.0757576	0.038835	0.0380952	0.0904255	0.611111	0.0353535	0.104396	0.0679612
5	127622491	T	C	rs32209	FBN2	single nucleotide variant	NM_001999.3(FBN2):c.6931A>G (p.Met2311Val)	Cardiovascular phenotype;Congenital contractural arachnodactyly;not provided;not specified	Papuan(HuOrigin)	0.169035	0.723822	Benign	C	0.0413223	0.0453747	0.0347258	0.0430048	0.215639	0.040886	0.056394	0.630319	0.641693	0.493421	0.628762	0.052527	0.0452841	0.0453523	0.0525107	0.137943	0.0722204	0.216387	0.0424528	0.0689655	0.646104	0.0520713	0.0451538	0.0626151	0.260417	0.237705	0.168605	0.602151	0.0606061	0.640777	0.604762	0.0638298	0.252525	0.040404	0.0384615	0.194175
16	30081367	G	T	rs2071390	ALDOA	single nucleotide variant	NM_184043.2(ALDOA):c.999+17G>T	not provided;not specified	Nganasans(HuOrigin)	0.231236	0.723309	Benign	T	0.205357	0.162287	0.118435	0.164644	0.0368687	0.25503	0.0919529	0.451506	0.562926	0.573333	0.420657	0.25125	0.164019	0.140064	0.188048	0.182995	0.189344	0.0356322	0.232861	0.113793	0.425258	0.27105	0.175299	0.211786	0.0260417	0.0409836	0.19186	0.354839	0.146465	0.475728	0.419048	0.218085	0	0.242424	0.192308	0.174757
2	97477374	C	T	rs12846	CNNM4	single nucleotide variant	NM_020184.3(CNNM4):c.*2120C>T	Cone-rod dystrophy amelogenesis imperfecta	Xuun(HuOrigin)	0.277113	0.722887	Benign	T	NA	NA	NA	NA	NA	NA	NA	NA	NA	NA	NA	NA	NA	NA	NA	NA	NA	0.729699	0.110849	0.158621	0.127728	0.0775216	0.0790634	0.143646	0.776042	0.762295	0.127907	0.241935	0.0909091	0.165049	0.133333	0.132979	0.924242	0.0606061	0.0384615	0.0679612
10	70645376	A	C	rs10509305	STOX1	single nucleotide variant	NM_001130161.2(STOX1):c.1824A>C (p.Glu608Asp)	Preeclampsia/eclampsia 4	Onge(HuOrigin)	0.186437	0.722654	Pathogenic	C	0.256198	0.215467	0.211053	0.223825	0.0595376	0.307492	0.241557	0.0815997	0.11891	0.186567	0.0704406	0.26089	0.220043	0.243619	0.224125	0.237011	0.215418	0.0579044	0.27896	0.248276	0.0750963	0.260357	0.226706	0.216912	0.0833333	0.057377	0.22093	0.0430108	0.287879	0.0582524	0.047619	0.244681	0.040404	0.272727	0.164835	0.228155
12	8756791	T	G	rs11046349	AICDA	single nucleotide variant	NM_020661.3(AICDA):c.*89A>C	Immunodeficiency with Hyper-IgM	MbutiPygmy(HGDP)	0.16293	0.721686	Benign	G	NA	NA	NA	NA	NA	NA	NA	NA	NA	NA	NA	NA	NA	NA	NA	NA	NA	0.554558	0.0695755	0.0482759	0.11104	0.166763	0.096416	0.143646	0.59375	0.540984	0.0755814	0.0322581	0.0707071	0.165049	0.0952381	0.0957447	0.661616	0.161616	0.0604396	0.038835
16	1634385	C	T	rs34762152	IFT140	single nucleotide variant	NM_014714.3(IFT140):c.1192G>A (p.Val398Ile)	Renal dysplasia, retinal pigmentary dystrophy, cerebellar ataxia and skeletal dysplasia;not specified	Papuan(HuOrigin)	0.10137	0.720059	Likely_benign	T	0.0701754	0.0638584	0.0668401	0.0651524	0.128621	0.0281497	0.103047	0.0894546	0.0789058	0.0416667	0.0927538	0.0479626	0.0630716	0.0717039	0.0567225	0.0735882	0.0686896	0.135988	0.0283019	0.103448	0.098329	0.0506329	0.0689275	0.0581181	0.145833	0.0901639	0.0697674	0.102151	0.0757576	0.0873786	0.1	0.0585106	0.111111	0.0252525	0.0604396	0.092233
2	73717567	G	T	rs2056486	ALMS1	single nucleotide variant	NM_015120.4(ALMS1):c.8484G>T (p.Arg2828Ser)	not specified	Taa_West(HuOrigin)	0.28147	0.71853	Benign	T	0.252066	0.239787	0.226458	0.235957	0.770209	0.406743	0.151144	0.00606904	0.012336	0.0227273	0.00420887	0.232438	0.235863	0.249812	0.231981	0.16028	0.238418	0.765125	0.373522	0.157343	0.00451031	0.23863	0.235664	0.268382	0.765625	0.762295	0.127907	0.00537634	0.247475	0.00485437	0.00952381	0.351064	0.914141	0.212121	0.203297	0.179612
2	73651967	C	T	rs3813227	ALMS1	single nucleotide variant	NM_015120.4(ALMS1):c.1177C>T (p.Arg393Cys)	not specified	Taa_West(HuOrigin)	0.281642	0.718358	Uncertain_significance	T	0.254167	0.240731	0.226532	0.236424	0.783772	0.407001	0.172885	0.00614319	0.0126649	0.0223881	0.00421971	0.232227	0.236381	0.251128	0.232059	0.160894	0.241653	0.776974	0.375592	0.186207	0.00449871	0.238342	0.235875	0.270718	0.786458	0.778689	0.127907	0.00537634	0.247475	0.00485437	0.00952381	0.351064	0.919192	0.212121	0.203297	0.179612
1	116206423	G	A	rs4839469	VANGL1	single nucleotide variant	NM_138959.2(VANGL1):c.346G>A (p.Ala116Thr)	Caudal dysgenesis syndrome;Neural tube defect	Karitiana(HuOrigin)	0.115001	0.718333	Likely_benign	A	0.0867769	0.156552	0.152556	0.140963	0.0657603	0.274803	0.183135	0.119224	0.100576	0.111842	0.124237	0.12172	0.144866	0.127341	0.129563	0.105206	0.146091	0.070395	0.248227	0.175862	0.121795	0.118595	0.132568	0.137201	0.0677083	0.0491803	0.0581395	0.123656	0.191919	0.160194	0.161905	0.202128	0.0656566	0.121212	0.126374	0.092233
1	169511755	T	C	rs4524	F5	single nucleotide variant	NM_000130.4(F5):c.2573A>G (p.Lys858Arg)	Thrombophilia due to activated protein C resistance;not specified	Pima(HuOrigin);Pima(HGDP)	0.283691	0.716309	Likely_benign	C	0.305785	0.27388	0.270601	0.267123	0.178563	0.415557	0.176769	0.221672	0.210954	0.203947	0.224695	0.212904	0.267539	0.272318	0.255664	0.35214	0.286719	0.176667	0.398585	0.196552	0.219794	0.214286	0.261327	0.256906	0.151042	0.245902	0.337209	0.322581	0.272727	0.165049	0.242857	0.351064	0.176768	0.19697	0.28022	0.330097
14	32330274	G	A	rs7148746	NUBPL	single nucleotide variant	NM_025152.2(NUBPL):c.*1888G>A	Mitochondrial complex I deficiency	ESN(1KG_phase3)	0.153258	0.715429	Likely_benign	A	NA	NA	NA	NA	NA	NA	NA	NA	NA	NA	NA	NA	NA	NA	NA	NA	NA	0.694662	0.0707547	0.0344828	0	0.0066168	0.0125843	0.0477941	0.739583	0.655738	0.00581395	0	0.0151515	0	0	0.111702	0.868687	0.0151515	0	0
3	159976271	C	T	rs16831149	IFT80	single nucleotide variant	NM_020800.2(IFT80):c.*42G>A	Jeune thoracic dystrophy	MbutiPygmy(HGDP)	0.092912	0.71478	Benign	T	0.0495868	0.0477855	0.0660642	0.0508706	0.447219	0.0489547	0.0630469	0.0227892	0.026607	0.0197368	0.0218146	0.0169984	0.0487529	0.0577644	0.0392626	0.0235756	0.0614351	0.431996	0.0602837	0.0551724	0.0198718	0.0165122	0.0477893	0.0712963	0.458333	0.459016	0.0290698	0.0645161	0.0353535	0.0242718	0.00952381	0.0904255	0.510101	0.010101	0.0494505	0.0194175
2	227922321	A	G	rs3769641	COL4A4	single nucleotide variant	NM_000092.4(COL4A4):c.2384-5T>C	Alport syndrome;not provided;not specified	Papuan(HGDP)	0.109219	0.714311	Likely_benign	G	0.0743802	0.0843213	0.0995778	0.0826073	0.0455603	0.0492602	0.0766634	0.168078	0.148741	0.253731	0.172522	0.0622445	0.0843592	0.0747558	0.0809202	0.11474	0.0884005	0.0471763	0.0625	0.062069	0.188303	0.0621404	0.0742638	0.0748614	0.0572917	0.0491803	0.145349	0.145161	0.106061	0.135922	0.209524	0.0744681	0.0353535	0.0757576	0.0769231	0.0728155
17	62492582	C	T	rs1427463	POLG2	single nucleotide variant	NM_007215.3(POLG2):c.505G>A (p.Ala169Thr)	Progressive External Ophthalmoplegia with Mitochondrial DNA Deletions;not provided;not specified	MSL(1KG_phase3)	0.203958	0.713689	Benign	T	0.119835	0.0869844	0.113747	0.0999223	0.72435	0.205216	0.100918	0.0313591	0.0327397	0.0533333	0.0307628	0.114126	0.0941417	0.113109	0.0880416	0.11543	0.122255	0.711472	0.205189	0.0793103	0.0353925	0.111239	0.10969	0.151934	0.755208	0.713115	0.0755814	0.00537634	0.0909091	0.038835	0.0190476	0.260638	0.818182	0.116162	0.115385	0.121359
18	21511034	C	A	rs1154232	LAMA3	single nucleotide variant	NM_000227.4(LAMA3):c.3618C>A (p.Asn1206Lys)	Epidermolysis bullosa, junctional;Laryngoonychocutaneous syndrome;not specified	Papuan(HGDP)	0.168718	0.713635	Benign	A	0.227273	0.21071	0.156386	0.204597	0.0570936	0.174475	0.139964	0.165851	0.133054	0.177632	0.174411	0.250971	0.203424	0.176912	0.213455	0.237322	0.185481	0.0662457	0.185142	0.106897	0.16838	0.258939	0.211848	0.189687	0.0677083	0.0901639	0.22093	0.204301	0.267677	0.15534	0.152381	0.218085	0.0252525	0.237374	0.208791	0.31068
6	36260914	C	T	rs2239796	PNPLA1	single nucleotide variant	NM_001145717.1(PNPLA1):c.504+11C>T	Congenital ichthyosiform erythroderma;not specified	Karitiana(HGDP)	0.287189	0.712811	Benign	T	0.395833	0.314159	0.263264	0.313571	0.0583528	0.519605	0.232385	0.286227	0.328182	0.348684	0.274455	0.377905	0.314732	0.267416	0.343693	0.26165	0.305456	0.0639374	0.436321	0.229167	0.277992	0.367588	0.335306	0.33549	0.046875	0.0901639	0.186047	0.204301	0.30303	0.31068	0.3	0.393617	0	0.333333	0.340659	0.208738
16	84208335	G	T	rs3826151	DNAAF1	single nucleotide variant	NM_178452.5(DNAAF1):c.1698+7G>T	Ciliary dyskinesia;not specified	Karitiana(HuOrigin)	0.287878	0.712122	Benign	T	0.305785	0.350735	0.314457	0.336562	0.0993602	0.468264	0.274216	0.366301	0.388161	0.401316	0.360144	0.358041	0.34777	0.294603	0.376762	0.264473	0.330453	0.10216	0.463443	0.272414	0.367268	0.354551	0.338054	0.327491	0.0520833	0.114754	0.226744	0.333333	0.378788	0.475728	0.357143	0.409574	0.0454545	0.328283	0.346154	0.26699
16	3656482	C	T	rs8061528	SLX4	single nucleotide variant	NM_032444.3(SLX4):c.753G>A (p.Ala251=)	Fanconi anemia;not specified	Papuan(HuOrigin)	0.252728	0.711557	Benign	T	0.202479	0.204427	0.215666	0.205537	0.2508	0.198774	0.217335	0.300696	0.361708	0.302632	0.284526	0.16659	0.201566	0.203898	0.185955	0.227151	0.203589	0.257245	0.209906	0.210345	0.313144	0.160334	0.205985	0.191176	0.229167	0.204918	0.203488	0.22043	0.186869	0.31068	0.328571	0.159574	0.242424	0.20202	0.241758	0.15534
2	238253065	C	T	rs2291795	COL6A3	single nucleotide variant	NM_004369.3(COL6A3):c.7596G>A (p.Lys2532=)	Bethlem myopathy 1;Collagen VI-related myopathy;Ullrich congenital muscular dystrophy 1;not specified	Onge(HuOrigin)	0.15288	0.710756	Benign	T	0.128099	0.115596	0.102087	0.107908	0.168922	0.128419	0.129938	0.174296	0.156888	0.157895	0.179077	0.0862977	0.109625	0.116854	0.104431	0.177533	0.117906	0.173683	0.132075	0.141379	0.178663	0.0875576	0.104632	0.10386	0.177083	0.196721	0.203488	0.215054	0.10101	0.184466	0.180952	0.0957447	0.136364	0.0606061	0.181319	0.218447
14	32328698	G	A	rs10162516	NUBPL	single nucleotide variant	NM_025152.2(NUBPL):c.*312G>A	Mitochondrial complex I deficiency	ESN(1KG_phase3)	0.157987	0.7107	Likely_benign	A	NA	NA	NA	NA	NA	NA	NA	NA	NA	NA	NA	NA	NA	NA	NA	NA	NA	0.69765	0.0780142	0.0586207	0	0.00978136	0.021082	0.0533088	0.739583	0.655738	0.0116279	0	0.0252525	0	0	0.138298	0.868687	0.020202	0.010989	0
1	94461754	A	G	rs1800717	ABCA4	single nucleotide variant	NM_000350.2(ABCA4):c.6730-3T>C	Cone-Rod Dystrophy, Recessive;Macular degeneration;Retinitis Pigmentosa, Recessive;Stargardt Disease, Recessive;not provided;not specified	Khomani(HuOrigin)	0.108667	0.709515	Benign	G	0.0166667	0.0387314	0.0697371	0.0422235	0.410732	0.0565809	0.0679968	0.0270285	0.019937	0.0131579	0.0290488	0.0059124	0.0397396	0.0632959	0.0230404	0.0498203	0.063254	0.4032	0.0742925	0.0655172	0.0224359	0.00518433	0.0361126	0.06814	0.416667	0.401639	0.0930233	0.0430108	0.030303	0.0145631	0.047619	0.0531915	0.383838	0.020202	0.021978	0.0825243
2	11966317	T	C	rs11524	LPIN1	single nucleotide variant	NM_145693.3(LPIN1):c.*1400T>C	Acute Recurrent Myoglobinuria	BiakaPygmy(HGDP)	0.195572	0.70919	Benign	C	NA	NA	NA	NA	NA	NA	NA	NA	NA	NA	NA	NA	NA	NA	NA	NA	NA	0.440221	0.173349	0.189655	0.186538	0.059641	0.111097	0.133272	0.5	0.401639	0.0523256	0.268817	0.0858586	0.223301	0.138095	0.18617	0.520202	0.0606061	0.104396	0.0728155
15	43021986	G	A	rs12594483	CDAN1	single nucleotide variant	NM_138477.4(CDAN1):c.2352+8C>T	Congenital dyserythropoietic anemia;not specified	BiakaPygmy(HGDP)	0.294411	0.705589	Benign	A	0.169421	0.110555	0.119909	0.116418	0.832461	0.131538	0.198687	0.299107	0.333683	0.263158	0.290311	0.157609	0.114508	0.146038	0.112542	0.311064	0.172048	0.822852	0.165094	0.203448	0.277635	0.168394	0.122042	0.210332	0.890625	0.844262	0.27907	0.274194	0.0757576	0.320388	0.257143	0.196809	0.984848	0.146465	0.104396	0.466019
15	91548601	G	A	rs3826033	VPS33B	single nucleotide variant	NM_018668.4(VPS33B):c.1105+9C>T	Arthrogryposis, Renal Dysfunction, and Cholestasis Syndrome;not specified	Papuan(HGDP)	0.236381	0.704795	Benign	A	0.152893	0.127787	0.129091	0.130944	0.0271552	0.310288	0.0977765	0.502664	0.504715	0.421053	0.502982	0.158413	0.131451	0.152402	0.136652	0.206063	0.163026	0.0295267	0.254717	0.0965517	0.505181	0.147668	0.144481	0.175875	0.00520833	0.0655738	0.209302	0.483871	0.121212	0.563107	0.528571	0.180851	0	0.146465	0.142857	0.199029
3	50233215	T	G	rs11919418	GNAT1	single nucleotide variant	NM_144499.2(GNAT1):c.*516T>G	Congenital Stationary Night Blindness, Dominant	Taa_West(HuOrigin)	0.2954	0.7046	Benign	G	NA	NA	NA	NA	NA	NA	NA	NA	NA	NA	NA	NA	NA	NA	NA	NA	NA	0.672188	0.241745	0.334483	0.0250321	0.241071	0.336041	0.298713	0.729167	0.713115	0.145349	0.0215054	0.338384	0.0145631	0.00952381	0.356383	0.808081	0.222222	0.362637	0.131068
19	13414594	C	T	rs16016	CACNA1A	single nucleotide variant	NM_001127221.1(CACNA1A):c.2094G>A (p.Thr698=)	Episodic ataxia type 2;Familial hemiplegic migraine type 1;Neurodevelopmental;not provided;not specified	Papuan(HGDP)	0.209392	0.702372	Benign	T	0.0909091	0.129698	0.116673	0.121296	0.0814389	0.22361	0.13864	0.304328	0.315086	0.268657	0.30174	0.116131	0.122424	0.115616	0.115489	0.259497	0.152957	0.0828539	0.221698	0.141379	0.293928	0.114631	0.12487	0.111624	0.0625	0.0983607	0.290698	0.263441	0.146465	0.354369	0.247619	0.207447	0.0454545	0.136364	0.10989	0.228155
9	127262802	C	G	rs1110061	NR5A1	single nucleotide variant	NM_004959.4(NR5A1):c.437G>C (p.Gly146Ala)	not specified	YRI(1KG_phase3)	0.22924	0.701316	Benign	G	0.0159574	0.0106457	0.0214272	0.0143182	0.764003	0.0625515	0.0242557	0.347629	0.326167	0.220588	0.354292	0.00578278	0.0119778	0.00977326	0.00759141	0.0861454	0.0623249	0.744973	0.0919811	0.0243056	0.33419	0.00432526	0.0111819	0.0753676	0.770833	0.598361	0.116279	0.354839	0.0151515	0.31068	0.304762	0.0957447	0.909091	0.010101	0	0.0970874
16	67320223	G	A	rs3868142	PLEKHG4	single nucleotide variant	NM_001129727.2(PLEKHG4):c.2489G>A (p.Arg830His)	not specified	Ju_hoan_North(HuOrigin);Khomani(HuOrigin)	0.166814	0.696822	Likely_benign	A	0.0785124	0.0746092	0.0787552	0.0728205	0.570251	0.0655505	0.0680556	0.00402349	0.000261917	0	0.00506171	0.140163	0.078314	0.0637181	0.0921093	0.15162	0.0949821	0.563683	0.0805687	0.0655172	0.00577664	0.140346	0.0747141	0.128913	0.598958	0.57377	0.133721	0.00537634	0.0656566	0.00970874	0	0.143617	0.636364	0.106061	0.0604396	0.169903
11	94150790	T	C	rs2155209	MRE11	single nucleotide variant	NM_005591.3(MRE11):c.*2501A>G	Ataxia-telangiectasia-like disorder 1	Papuan(HGDP)	0.273769	0.69682	Benign	C	NA	NA	NA	NA	NA	NA	NA	NA	NA	NA	NA	NA	NA	NA	NA	NA	NA	0.133211	0.321934	0.351724	0.274422	0.332182	0.353361	0.334254	0.09375	0.0983607	0.22093	0.317204	0.313131	0.281553	0.247619	0.265957	0.0808081	0.328283	0.423077	0.305825
17	42152103	G	A	rs3815076	G6PC3	single nucleotide variant	NM_138387.3(G6PC3):c.381G>A (p.Thr127=)	Severe congenital neutropenia;not specified	Karitiana(HGDP)	0.268142	0.696144	Benign	A	0.0625	0.0658863	0.0937881	0.0717104	0.10654	0.394693	0.127755	0.722857	0.724174	0.703947	0.722708	0.13308	0.070495	0.0836459	0.0649659	0.191777	0.147212	0.105747	0.338443	0.113793	0.742912	0.123201	0.0746559	0.124309	0.0885417	0.0901639	0.267442	0.698925	0.0757576	0.728155	0.704762	0.228723	0.111111	0.121212	0.043956	0.174757
16	84209738	T	C	rs2288020	DNAAF1	single nucleotide variant	NM_178452.5(DNAAF1):c.1898T>C (p.Leu633Ser)	Ciliary dyskinesia;not specified	Karitiana(HGDP)	0.306063	0.693937	Benign	C	0.323529	0.362777	0.32521	0.347014	0.102585	0.472007	0.293667	0.374959	0.400315	0.427632	0.367653	0.363683	0.358408	0.302029	0.385699	0.269759	0.337205	0.105561	0.462175	0.288194	0.375323	0.360599	0.346184	0.331181	0.0520833	0.122951	0.238372	0.333333	0.393939	0.490291	0.361905	0.404255	0.0505051	0.338384	0.351648	0.26699
13	75861001	A	G	rs557337	TBC1D4	single nucleotide variant	NM_014832.4(TBC1D4):c.3824T>C (p.Val1275Ala)	not specified	BiakaPygmy(HGDP)	0.11606	0.693464	Likely_benign	G	0.0495868	0.0562306	0.0640688	0.0560398	0.503683	0.0545381	0.0645738	0.000333927	0	0	0.000427777	0.0413415	0.0584151	0.0499249	0.0632149	0.014479	0.0636394	0.488018	0.0648585	0.0517241	0	0.0460564	0.0586059	0.0882353	0.484375	0.442623	0.00581395	0	0.0505051	0	0	0.111702	0.611111	0.0454545	0.0824176	0.0291262
1	21904574	A	G	rs2242421	ALPL	single nucleotide variant	NM_000478.5(ALPL):c.*433A>G	Hypophosphatasia	Karitiana(HGDP)	0.235191	0.693381	Benign	G	NA	NA	NA	NA	NA	NA	NA	NA	NA	NA	NA	NA	NA	NA	NA	NA	NA	0.0209051	0.283688	0.106897	0.541237	0.113676	0.0857607	0.109982	0.00520833	0.0409836	0.313953	0.575269	0.10101	0.514563	0.552381	0.260638	0	0.10101	0.0934066	0.199029
22	51062938	C	T	rs5770953	ARSA	single nucleotide variant	NM_000487.5(ARSA):c.*635G>A	Metachromatic leukodystrophy	Karitiana(HGDP)	0.306953	0.693047	Benign	T	NA	NA	NA	NA	NA	NA	NA	NA	NA	NA	NA	NA	NA	NA	NA	NA	NA	0.421071	0.382075	0.244828	0.42268	0.198216	0.206793	0.226937	0.447917	0.434426	0.337209	0.462366	0.227273	0.359223	0.466667	0.303191	0.474747	0.156566	0.225275	0.334951
15	65255368	G	T	rs57438358	SPG21	single nucleotide variant	NM_016630.6(SPG21):c.*593A=	Spastic Paraplegia, Recessive	Ju_hoan_North(HuOrigin)	0.10546	0.689995	Likely_benign	T	NA	NA	NA	NA	NA	NA	NA	NA	NA	NA	NA	NA	NA	NA	NA	NA	NA	0.25563	0.0212264	0.0448276	0	0.00834773	0.0127108	0.0367647	0.25	0.303279	0.168605	0.00537634	0.010101	0	0	0.0212766	0.323232	0.020202	0.00549451	0.165049
15	55496853	G	A	rs3179664	RAB27A	single nucleotide variant	NM_004580.4(RAB27A):c.*852C>T	Griscelli disease	Hadza(HuOrigin)	0.287517	0.689755	Benign	A	NA	NA	NA	NA	NA	NA	NA	NA	NA	NA	NA	NA	NA	NA	NA	NA	NA	0.684192	0.140995	0.12069	0.107969	0.164364	0.1817	0.187269	0.786458	0.704918	0.215116	0.102151	0.191919	0.179612	0.128571	0.154255	0.722222	0.151515	0.159341	0.15534
1	213069738	C	T	rs12567728	FLVCR1	single nucleotide variant	NM_014053.3(FLVCR1):c.*1106C>T	Posterior column ataxia with retinitis pigmentosa	Karitiana(HGDP)	0.310323	0.689677	Benign	T	NA	NA	NA	NA	NA	NA	NA	NA	NA	NA	NA	NA	NA	NA	NA	NA	NA	0.179461	0.465721	0.334483	0.429587	0.155113	0.181984	0.197222	0.208333	0.245902	0.215116	0.489247	0.161616	0.42233	0.485714	0.462766	0.156566	0.156566	0.208791	0.179612
8	141262869	C	T	rs11166964	TRAPPC9	single nucleotide variant	NM_031466.7(TRAPPC9):c.2725+7G>A	Intellectual Disability, Recessive;not specified	Pima(HGDP)	0.096109	0.689605	Benign	T	0.133621	0.124515	0.106214	0.130812	0.0340376	0.244117	0.107711	0.00218317	0.00419287	0	0.00167131	0.18014	0.131274	0.138785	0.15283	0.0762867	0.123368	0.0356732	0.195035	0.103448	0.000641026	0.175691	0.142375	0.155331	0.0416667	0.057377	0.0813953	0	0.106061	0.00485437	0.0047619	0.138298	0.010101	0.161616	0.120879	0.106796
6	74348142	T	C	rs3757112	SLC17A5	single nucleotide variant	NM_012434.4(SLC17A5):c.606A>G (p.Ser202=)	Salla disease;not provided	Pima(HuOrigin);Pima(HGDP)	0.061357	0.688643	Benign	C	0.0462185	0.065845	0.0497387	0.0612423	0.0143561	0.290222	0.0439746	0.0484608	0.0762179	0.0657895	0.0409267	0.0386145	0.0608124	0.0697151	0.0562548	0.0650611	0.0751634	0.0137836	0.234043	0.0275862	0.0468549	0.0402994	0.0599144	0.0652574	0.0104167	0.0245902	0.0465116	0.0483871	0.0656566	0.092233	0.052381	0.106383	0	0.0353535	0.0274725	0.0339806
11	64519062	T	C	rs532747	PYGM	single nucleotide variant	NM_005609.3(PYGM):c.1827+7A>G	Glycogen storage disease, type V;not provided;not specified	Papuan(HuOrigin)	0.171313	0.68583	Benign	C	0.119835	0.0850787	0.0759868	0.0869664	0.0671917	0.292165	0.12366	0.35677	0.4099	0.335526	0.342926	0.11371	0.0844879	0.0745877	0.0850246	0.146982	0.119048	0.0661461	0.265957	0.134483	0.365335	0.117156	0.0916288	0.103131	0.0520833	0.0819672	0.197674	0.27957	0.111111	0.412621	0.352381	0.191489	0.0454545	0.0707071	0.0714286	0.150485
13	23755127	G	A	rs4770403	SGCG	single nucleotide variant	NM_000231.2(SGCG):c.-88G>A	Limb-Girdle Muscular Dystrophy, Recessive;Severe autosomal recessive muscular dystrophy of childhood - North African type	Papuan(HuOrigin)	0.137503	0.683926	Likely_benign	A	NA	NA	NA	NA	NA	NA	NA	NA	NA	NA	NA	NA	NA	NA	NA	NA	NA	0.0947344	0.112028	0.244828	0.143959	0.136939	0.170841	0.172794	0.125	0.131148	0.104651	0.155914	0.212121	0.169903	0.171429	0.106383	0.10101	0.217172	0.197802	0.116505
16	28855727	A	G	rs4788099	TUFM	single nucleotide variant	NM_003321.4(TUFM):c.817+13T>C	Combined oxidative phosphorylation deficiency	Papuan(HuOrigin)	0.317056	0.682944	Benign	G	0.384298	0.397807	0.303795	0.385813	0.271356	0.487449	0.274444	0.102673	0.144036	0.138158	0.0915268	0.425254	0.388169	0.36057	0.415403	0.228078	0.346869	0.256109	0.45283	0.251724	0.107465	0.421902	0.399831	0.375461	0.317708	0.221311	0.180233	0.102151	0.363636	0.165049	0.128571	0.462766	0.181818	0.363636	0.346154	0.291262
18	42532693	C	A	rs1064204	SETBP1	single nucleotide variant	NM_015559.3(SETBP1):c.3388C>A (p.Pro1130Thr)	Schinzel-Giedion syndrome;not provided;not specified	Pima(HGDP)	0.138763	0.682665	Benign	A	0.0702479	0.116319	0.126197	0.109554	0.036914	0.315511	0.116415	0.186358	0.234121	0.236842	0.173208	0.0761804	0.110252	0.11524	0.0941447	0.119741	0.129974	0.0455277	0.25772	0.163194	0.183162	0.0730725	0.100104	0.0865562	0.0208333	0.0409836	0.116279	0.150538	0.0909091	0.203883	0.209524	0.276596	0.020202	0.111111	0.115385	0.0873786
17	62493167	A	G	rs9897606	POLG2	single nucleotide variant	NM_007215.3(POLG2):c.-81T>C	Progressive External Ophthalmoplegia with Mitochondrial DNA Deletions	MSL(1KG_phase3)	0.237304	0.680343	Benign	G	NA	NA	NA	NA	NA	NA	NA	NA	NA	NA	NA	NA	NA	NA	NA	NA	NA	0.711814	0.202128	0.0793103	0.0352564	0.111015	0.109872	0.152214	0.755208	0.713115	0.0755814	0.00537634	0.0909091	0.038835	0.0190476	0.260638	0.818182	0.116162	0.115385	0.121359
1	169498975	T	C	rs6030	F5	single nucleotide variant	NM_000130.4(F5):c.5290A>G (p.Met1764Val)	Thrombophilia due to activated protein C resistance;not specified	Pima(HGDP)	0.32109	0.67891	Likely_benign	C	0.375	0.33134	0.341963	0.331896	0.191569	0.509955	0.244734	0.257642	0.286089	0.302632	0.249653	0.294028	0.328083	0.355964	0.308973	0.406495	0.35296	0.191034	0.477541	0.255172	0.238065	0.298215	0.33656	0.336096	0.171875	0.237705	0.430233	0.349462	0.30303	0.18932	0.27619	0.446809	0.176768	0.262626	0.318681	0.364078
5	176726635	G	A	rs3088050	NSD1	single nucleotide variant	NM_022455.4(NSD1):c.*4175G>A	Sotos Syndrome;Weaver syndrome	Karitiana(HuOrigin)	0.237908	0.678758	Benign	A	NA	NA	NA	NA	NA	NA	NA	NA	NA	NA	NA	NA	NA	NA	NA	NA	NA	0.0441176	0.37234	0.168966	0.424968	0.200865	0.215491	0.212707	0.0208333	0.0491803	0.331395	0.435484	0.191919	0.378641	0.428571	0.255319	0	0.19697	0.148352	0.364078
19	39068641	A	C	rs1468571	RYR1	single nucleotide variant	NM_000540.2(RYR1):c.14256A>C (p.Thr4752=)	Malignant hyperthermia susceptibility;Multiminicore Disease;Myopathy, Central Core;Neuromuscular disease, congenital, with uniform type 1 fiber;not provided;not specified	BiakaPygmy(HGDP)	0.107986	0.677728	Benign	C	0.0123967	0.0201091	0.0179099	0.0208455	0.300357	0.173044	0.0158825	0.0981075	0.108434	0.0723684	0.0956443	0.049103	0.0210383	0.0168792	0.0246479	0.0664075	0.051876	0.2997	0.1513	0.0241379	0.100775	0.051356	0.0203352	0.072744	0.291667	0.319672	0.116279	0.0483871	0.0151515	0.0970874	0.12381	0.154255	0.292929	0.0454545	0.0384615	0.0970874
11	64514506	A	G	rs569602	PYGM	single nucleotide variant	NM_005609.3(PYGM):c.2313-47T>C	not specified	Papuan(HuOrigin)	0.179765	0.677378	Benign	G	0.119835	0.0850427	0.0757867	0.0872841	0.0781678	0.292226	0.123384	0.384797	0.431568	0.342105	0.372737	0.113718	0.084669	0.075	0.085535	0.146034	0.119764	0.075437	0.266509	0.134483	0.398579	0.117426	0.0914111	0.104052	0.0729167	0.0901639	0.203488	0.322581	0.111111	0.441748	0.390476	0.191489	0.0454545	0.0707071	0.0714286	0.145631
9	130454553	T	C	rs1043433	STXBP1	single nucleotide variant	NM_003165.3(STXBP1):c.*1516T>C	Early Infantile Epileptic Encephalopathy, Autosomal Dominant	Taa_West(HuOrigin)	0.073546	0.676454	Benign	C	NA	NA	NA	NA	NA	NA	NA	NA	NA	NA	NA	NA	NA	NA	NA	NA	NA	0.194642	0.0106383	0.00689655	0.0713368	0.000287853	0.00103734	0.0174632	0.171875	0.122951	0	0.112903	0.00505051	0.0825243	0.0571429	0.0159574	0.29798	0	0	0
17	36046991	T	C	rs1058166	HNF1B	single nucleotide variant	NM_000458.3(HNF1B):c.*384A>G	Familial hypoplastic, glomerulocystic kidney	Damara(HuOrigin)	0.115407	0.676259	Benign	C	NA	NA	NA	NA	NA	NA	NA	NA	NA	NA	NA	NA	NA	NA	NA	NA	NA	0.452392	0.0661939	0.0448276	0.00192555	0.0506621	0.0602074	0.0782689	0.484375	0.368852	0.0348837	0	0.0353535	0	0	0.111702	0.479798	0.10101	0.0604396	0.038835
17	76472768	G	A	rs7405830	DNAH17	single nucleotide variant	NM_173628.3(DNAH17):c.8040C>T (p.Leu2680=)	not specified	MbutiPygmy(HGDP)	0.287644	0.673894	Benign	A	0.231092	0.197746	0.211687	0.197322	0.695028	0.229974	0.190224	0.289352	0.232949	0.227273	0.305519	0.205579	0.202413	0.212935	0.210845	0.248939	0.228576	0.683629	0.242317	0.186207	0.312741	0.214574	0.212115	0.260589	0.6875	0.688525	0.209302	0.333333	0.20202	0.247573	0.3	0.18617	0.838384	0.161616	0.186813	0.242718
22	41903813	A	C	rs137831	ACO2	single nucleotide variant	NM_001098.2(ACO2):c.192A>C (p.Thr64=)	not provided;not specified	Karitiana(HGDP);Pima(HGDP)	0.326225	0.673775	Benign	C	0.197479	0.204946	0.23464	0.207997	0.353157	0.646794	0.300359	0.572748	0.429848	0.366667	0.612831	0.259104	0.205378	0.203927	0.19032	0.373617	0.312151	0.355036	0.569575	0.289655	0.580645	0.257349	0.200533	0.250462	0.390625	0.311475	0.511628	0.682796	0.227273	0.567961	0.62381	0.478723	0.328283	0.217172	0.241758	0.393204
2	179587546	A	G	rs16866473	TTN	single nucleotide variant	NM_133378.4(TTN):c.18348T>C (p.Asp6116=)	Cardiovascular phenotype;Dilated Cardiomyopathy, Dominant;Distal myopathy Markesbery-Griggs type;Hereditary myopathy with early respiratory failure;Hypertrophic cardiomyopathy;Limb-Girdle Muscular Dystrophy, Recessive;Myopathy, early-onset, with fatal cardiomyopathy;not provided;not specified	Taa_West(HuOrigin)	0.107918	0.673332	Likely_benign	G	0.0371901	0.0257079	0.0199859	0.0260335	0.0898811	0.188548	0.0283526	0.0284694	0.00345745	0	0.0354494	0.0574953	0.0262704	0.0311796	0.0296216	0.175968	0.0589803	0.0868766	0.161939	0.0275862	0.0335917	0.0532834	0.0249514	0.0477941	0.104167	0.139344	0.215116	0.0430108	0.030303	0.0145631	0.00952381	0.148936	0.0909091	0.0707071	0.032967	0.184466
13	39422624	C	T	rs9548505	FREM2	single nucleotide variant	NM_207361.5(FREM2):c.6196C>T (p.Arg2066Cys)	Cryptophthalmos syndrome	Karitiana(HGDP)	0.113546	0.672168	Benign	T	0.144628	0.116418	0.091456	0.105824	0.141627	0.325545	0.110306	0.000598411	0.000788229	0	0.000554631	0.0717849	0.104732	0.100075	0.0905994	0.131835	0.120633	0.138799	0.300948	0.0965517	0.00128535	0.0619954	0.109655	0.115809	0.135417	0.139344	0.0872093	0	0.0959596	0.00485437	0	0.175532	0.0656566	0.0808081	0.0934066	0.135922
13	22276668	C	T	rs3715	FGF9	single nucleotide variant	NM_002010.2(FGF9):c.*1094C>T	Symphalangism-brachydactyly syndrome	MbutiPygmy(HGDP)	0.136183	0.671509	Benign	T	NA	NA	NA	NA	NA	NA	NA	NA	NA	NA	NA	NA	NA	NA	NA	NA	NA	0.47687	0.0766509	0.127586	0.0442308	0.172046	0.135302	0.164207	0.53125	0.516393	0.104651	0.0322581	0.121212	0.0291262	0.0714286	0.117021	0.520202	0.161616	0.0934066	0.0776699
4	71494619	G	A	rs1993579	ENAM	single nucleotide variant	NM_031889.2(ENAM):c.-123G>A	Amelogenesis Imperfecta, Dominant	ESN(1KG_phase3);LWK(1KG_phase3)	0.171954	0.671481	Benign	A	NA	NA	NA	NA	NA	NA	NA	NA	NA	NA	NA	NA	NA	NA	NA	NA	NA	0.642989	0.0778302	0.0931034	0.0166667	0.0426759	0.0414397	0.0882353	0.697917	0.639344	0.0755814	0.0376344	0.030303	0.00970874	0.0047619	0.111702	0.843434	0.0454545	0.0714286	0.0631068
9	139323201	A	G	rs1128877	INPP5E	single nucleotide variant	NM_019892.5(INPP5E):c.*926T>C	Joubert syndrome	Karitiana(HGDP)	0.150513	0.670915	Likely_benign	G	NA	NA	NA	NA	NA	NA	NA	NA	NA	NA	NA	NA	NA	NA	NA	NA	NA	0.0554917	0.22104	0.0965517	0.151866	0.0609896	0.116556	0.0992647	0.0572917	0.0737705	0.197674	0.139785	0.171717	0.150485	0.171429	0.234043	0	0.0707071	0.142857	0.169903
16	67318242	A	G	rs8044843	PLEKHG4	single nucleotide variant	NM_001129727.2(PLEKHG4):c.1574A>G (p.Asp525Gly)	not specified	BiakaPygmy(HGDP)	0.186574	0.670569	Likely_benign	G	0.110169	0.105231	0.113413	0.10398	0.637441	0.112056	0.086861	0.0237057	0.015715	0.027027	0.0257925	0.149823	0.110904	0.0895015	0.129193	0.182106	0.12078	0.633549	0.127962	0.0724138	0.0245478	0.149366	0.103716	0.156481	0.677083	0.598361	0.180233	0.0645161	0.106061	0.038835	0.0142857	0.170213	0.69697	0.131313	0.0824176	0.18932
18	32470291	G	A	rs9944927	DTNA	single nucleotide variant	NM_032975.3(DTNA):c.*2593G>A	not specified	Khomani(HuOrigin)	0.238746	0.670345	Benign	A	0.201299	0.206212	0.253399	0.211066	0.574557	0.13114	0.27842	0.0180849	0.017666	0	0.0182177	0.17692	0.208816	0.198582	0.200501	0.216198	0.221875	0.576967	0.14033	0.28125	0.00897436	0.188147	0.198518	0.247689	0.515625	0.532787	0.186047	0.0268817	0.237374	0.00970874	0.0047619	0.218085	0.616162	0.217172	0.208791	0.223301
6	76628176	A	C	rs1341567	MYO6	single nucleotide variant	NM_004999.3(MYO6):c.*3447A>C	Nonsyndromic Hearing Loss, Dominant;Nonsyndromic Hearing Loss, Recessive	YRI(1KG_phase3)	0.135443	0.670112	Benign	C	NA	NA	NA	NA	NA	NA	NA	NA	NA	NA	NA	NA	NA	NA	NA	NA	NA	0.612546	0.0436321	0.0137931	0	0.000575374	0.00499157	0.046875	0.635417	0.54918	0.0232558	0	0	0	0	0.0531915	0.79798	0	0	0.0145631
2	189898498	C	T	rs7586	COL5A2	single nucleotide variant	NM_000393.4(COL5A2):c.*298G>A	Ehlers-Danlos syndrome, type 7A	MbutiPygmy(HGDP)	0.06109	0.669679	Likely_benign	T	NA	NA	NA	NA	NA	NA	NA	NA	NA	NA	NA	NA	NA	NA	NA	NA	NA	0.135966	0.0318396	0.0517241	0.00192802	0.0467398	0.0412445	0.0432781	0.135417	0.0901639	0.0174419	0	0.0353535	0.00970874	0	0.0691489	0.126263	0.0555556	0.043956	0.0242718
14	32328830	C	T	rs10162515	NUBPL	single nucleotide variant	NM_025152.2(NUBPL):c.*444C>T	Mitochondrial complex I deficiency	ESN(1KG_phase3)	0.164037	0.669297	Likely_benign	T	NA	NA	NA	NA	NA	NA	NA	NA	NA	NA	NA	NA	NA	NA	NA	NA	NA	0.654361	0.0673759	0.0344828	0	0.00662061	0.0123833	0.046875	0.703125	0.581967	0.00581395	0	0.0151515	0	0	0.111702	0.833333	0.0151515	0	0
20	6056918	T	C	rs6053878	FERMT1	single nucleotide variant	NM_017671.4(FERMT1):c.*902A>G	Kindler's syndrome	MbutiPygmy(HGDP)	0.099938	0.669293	Likely_benign	C	NA	NA	NA	NA	NA	NA	NA	NA	NA	NA	NA	NA	NA	NA	NA	NA	NA	0.186509	0.0507075	0.062069	0.0096401	0.0273303	0.0561608	0.0588235	0.177083	0.122951	0.133721	0.00537634	0.0555556	0.00970874	0.00952381	0.0638298	0.212121	0.0606061	0.0549451	0.140777
16	23227580	C	T	rs9932505	SCNN1G	single nucleotide variant	NM_001039.3(SCNN1G):c.*790C>T	Pseudohypoaldosteronism type 1 autosomal recessive;Pseudoprimary hyperaldosteronism	Hadza(HuOrigin)	0.171771	0.669138	Benign	T	NA	NA	NA	NA	NA	NA	NA	NA	NA	NA	NA	NA	NA	NA	NA	NA	NA	0.23308	0.128842	0.227586	0.0661954	0.227691	0.229545	0.21719	0.244792	0.221311	0.0174419	0.016129	0.237374	0.0679612	0.0904762	0.138298	0.247475	0.232323	0.21978	0.0631068
15	63363402	G	A	rs11558748	TPM1	single nucleotide variant	NM_001018020.1(TPM1):c.*31G>A	not specified	CHD(HapMap);JPT(HapMap)	0.331113	0.668887	Benign	A	0	0.00512528	0.00137363	0.00979112	0.00671141	0	0.00308642	0.15	0.125	NA	0.152778	0.00478469	0.00547046	0	0.00377644	0.00964187	0.00740741	0.00239234	0	0	0.333333	0	0.00972222	0	0.333333	0.327869	0.412791	0.494624	0.383838	0.470874	0.47619	0.382979	0.267677	0.318182	0.362637	0.436893
6	51611470	T	C	rs2397060	PKHD1	single nucleotide variant	NM_138694.3(PKHD1):c.9998+49A>G	not specified	Ju_hoan_North(HuOrigin)	0.285837	0.668709	Benign	C	0.205128	0.138491	0.160793	0.149487	0.721756	0.145919	0.197456	0.146645	0.132055	0.217105	0.149727	0.170631	0.146312	0.166033	0.146187	0.23022	0.194735	0.717497	0.160757	0.231034	0.144872	0.17781	0.15157	0.191176	0.723958	0.639344	0.255814	0.209677	0.0757576	0.116505	0.152381	0.154255	0.828283	0.151515	0.164835	0.174757
6	132172368	A	C	rs1044498	ENPP1	single nucleotide variant	NM_006208.3(ENPP1):c.517A>C (p.Lys173Gln)	Arterial calcification of infancy;Diabetes mellitus type 2;Hypophosphatemic Rickets, Recessive;Insulin resistance, susceptibility to;Obesity;not specified	GWD(1KG_phase3)	0.269371	0.668682	Benign	C	0.14876	0.140254	0.164518	0.14404	0.786048	0.187872	0.219222	0.0976618	0.0980598	0.0592105	0.0979617	0.128338	0.146331	0.147301	0.15072	0.168768	0.181403	0.784612	0.217494	0.203448	0.0941935	0.138169	0.140947	0.20941	0.807292	0.688525	0.156977	0.0860215	0.131313	0.101942	0.114286	0.234043	0.909091	0.156566	0.0934066	0.213592
5	136955383	G	T	rs3813316	KLHL3	single nucleotide variant	NM_017415.2(KLHL3):c.*2404C>A	Pseudohypoaldosteronism type 1 autosomal dominant	Kharia(HuOrigin)	0.123621	0.668046	Benign	T	NA	NA	NA	NA	NA	NA	NA	NA	NA	NA	NA	NA	NA	NA	NA	NA	NA	0.0142496	0.153302	0.0344828	0.357881	0.0596198	0.0560893	0.0726103	0.0104167	0.0327869	0.215116	0.435484	0.0858586	0.398058	0.371429	0.111702	0	0.040404	0.0769231	0.135922
9	131095112	A	C	rs7850697	COQ4	single nucleotide variant	NM_016035.4(COQ4):c.533-17A>C	not specified	MbutiPygmy(HGDP)	0.293649	0.66789	Benign	C	0.177686	0.177864	0.199269	0.188424	0.705832	0.205612	0.277634	0.279221	0.292562	0.434211	0.274057	0.204482	0.180074	0.173034	0.166042	0.241327	0.230042	0.706504	0.21816	0.27931	0.266753	0.197406	0.171966	0.222325	0.697917	0.655738	0.238372	0.263441	0.207071	0.305825	0.257143	0.212766	0.823232	0.181818	0.203297	0.291262
16	23224416	G	A	rs13306653	SCNN1G	single nucleotide variant	NM_001039.3(SCNN1G):c.1432-7G>A	Pseudohypoaldosteronism type 1 autosomal recessive;Pseudoprimary hyperaldosteronism;not provided;not specified	Hadza(HuOrigin)	0.173323	0.667586	Benign	A	0.260331	0.223475	0.195478	0.215751	0.25363	0.0961083	0.23283	0.0625816	0.0591933	0.0328947	0.0637914	0.226811	0.215392	0.201873	0.211639	0.0805566	0.198827	0.244924	0.129147	0.227586	0.0670103	0.228481	0.230248	0.219557	0.255208	0.237705	0.0174419	0.016129	0.237374	0.0728155	0.0904762	0.138298	0.267677	0.232323	0.225275	0.0631068
4	71511259	G	C	rs7665492	ENAM	single nucleotide variant	NM_031889.2(ENAM):c.*687G>C	Amelogenesis Imperfecta, Dominant	ESN(1KG_phase3)	0.176048	0.667386	Benign	C	NA	NA	NA	NA	NA	NA	NA	NA	NA	NA	NA	NA	NA	NA	NA	NA	NA	0.633002	0.14133	0.0931034	0.0173522	0.0436164	0.041683	0.0898148	0.708333	0.647541	0.0755814	0.0430108	0.030303	0.00970874	0.0047619	0.143617	0.843434	0.0454545	0.0714286	0.0533981
16	8876692	C	T	rs7201586	ABAT	single nucleotide variant	NM_020686.5(ABAT):c.*1405C>T	Gamma-aminobutyric acid transaminase deficiency	BTQ(AAGC)	0.291001	0.667333	Benign	T	NA	NA	NA	NA	NA	NA	NA	NA	NA	NA	NA	NA	NA	NA	NA	NA	NA	0.25167	0.201651	0.196552	0.361825	0.283612	0.292778	0.25878	0.234375	0.262295	0.319767	0.301075	0.227273	0.305825	0.309524	0.234043	0.277778	0.257576	0.296703	0.257282
14	32329222	C	G	rs10147479	NUBPL	single nucleotide variant	NM_025152.2(NUBPL):c.*836C>G	Mitochondrial complex I deficiency	ESN(1KG_phase3)	0.201834	0.666853	Likely_benign	G	NA	NA	NA	NA	NA	NA	NA	NA	NA	NA	NA	NA	NA	NA	NA	NA	NA	0.694259	0.070922	0.0344828	0	0.00666667	0.0126302	0.0480591	0.739583	0.655738	0.00581395	0	0.0151515	0	0	0.111702	0.868687	0.0151515	0	0
15	42681199	G	A	rs1801449	CAPN3	single nucleotide variant	NM_000070.2(CAPN3):c.706G>A (p.Ala236Thr)	Limb-Girdle Muscular Dystrophy, Recessive;Limb-girdle muscular dystrophy, type 2A;not provided;not specified	BiakaPygmy(HGDP);Yoruba(HGDP)	0.166502	0.666832	Benign	A	0.0578512	0.0403402	0.0588696	0.0461206	0.643209	0.0761448	0.104861	0.12848	0.1174	0.0526316	0.13221	0.0945671	0.0454082	0.0621723	0.0449989	0.140155	0.083605	0.631093	0.0768322	0.106897	0.127892	0.0978699	0.0495133	0.120404	0.666667	0.655738	0.151163	0.172043	0.0353535	0.0970874	0.114286	0.0851064	0.767677	0.0505051	0.0164835	0.116505
17	62016704	A	G	rs2727278	SCN4A	single nucleotide variant	NM_000334.4(SCN4A):c.*1427T>C	Congenital Myasthenic Syndrome, Recessive;Hyperkalemic Periodic Paralysis;Hypokalemic periodic paralysis;Paramyotonia congenita of von Eulenburg;Potassium aggravated myotonia	YRI(1KG_phase3)	0.129867	0.666429	Benign	G	NA	NA	NA	NA	NA	NA	NA	NA	NA	NA	NA	NA	NA	NA	NA	NA	NA	0.583947	0.0412736	0.00689655	0.00192555	0	0.00155864	0.0267035	0.609375	0.590164	0	0	0	0	0.0047619	0.0585106	0.707071	0	0	0.00485437
17	62016860	A	T	rs2727277	SCN4A	single nucleotide variant	NM_000334.4(SCN4A):c.*1271T>A	Congenital Myasthenic Syndrome, Recessive;Hyperkalemic Periodic Paralysis;Hypokalemic periodic paralysis;Paramyotonia congenita of von Eulenburg;Potassium aggravated myotonia	YRI(1KG_phase3)	0.129965	0.666331	Benign	T	NA	NA	NA	NA	NA	NA	NA	NA	NA	NA	NA	NA	NA	NA	NA	NA	NA	0.583353	0.0413712	0.00689655	0.00192308	0	0.00155561	0.0266544	0.609375	0.590164	0	0	0	0	0.0047619	0.0585106	0.712121	0	0	0.00485437
3	133474328	G	A	rs12769	TF	single nucleotide variant	NM_001063.3(TF):c.624G>A (p.Ser208=)	Atransferrinemia	Onge(HuOrigin)	0.334593	0.665407	Benign	A	0.35124	0.316756	0.25632	0.313452	0.126646	0.455067	0.236842	0.419695	0.480094	0.493421	0.402915	0.302867	0.31087	0.293698	0.32398	0.410704	0.288141	0.13374	0.443396	0.217241	0.415484	0.313867	0.313515	0.297048	0.151042	0.0983607	0.383721	0.419355	0.328283	0.432039	0.457143	0.303191	0.0959596	0.308081	0.395604	0.427184
7	87056176	T	C	rs2230028	ABCB4	single nucleotide variant	NM_000443.3(ABCB4):c.1954A>G (p.Arg652Gly)	Familial Intrahepatic Cholestasis;Progressive familial intrahepatic cholestasis 3;Progressive intrahepatic cholestasis;not specified	BiakaPygmy(HGDP)	0.121141	0.664573	Benign	C	0.0743802	0.0721417	0.0800975	0.0776771	0.35439	0.0899045	0.0899702	0.0266311	0.0255937	0.0333333	0.026834	0.0724718	0.0737389	0.0910795	0.0670704	0.138698	0.102321	0.338479	0.0933806	0.110345	0.0275641	0.0757052	0.0847392	0.100184	0.4375	0.319672	0.127907	0.0430108	0.0858586	0.0242718	0.0190476	0.0904255	0.419192	0.0808081	0.0714286	0.126214
9	100201551	A	G	rs7853578	TDRD7	single nucleotide variant	NM_014290.2(TDRD7):c.588A>G (p.Gln196=)	Congenital cataract;not specified	Ju_hoan_North(HuOrigin)	0.086271	0.663729	Likely_benign	G	0.025	0.0321324	0.0303559	0.0308357	0.164275	0.0209277	0.028225	0.108403	0.0989474	0.0441176	0.111513	0.0340573	0.0320105	0.0254873	0.0346599	0.075709	0.0391218	0.168785	0.031401	0.0413793	0.0996144	0.0356932	0.0346995	0.0533708	0.130208	0.180328	0.0755814	0.166667	0.010101	0.0825243	0.0809524	0.0265957	0.146465	0.0454545	0.032967	0.0873786
2	73717656	A	G	rs10193972	ALMS1	single nucleotide variant	NM_015120.4(ALMS1):c.8573A>G (p.Asn2858Ser)	not specified	ESN(1KG_phase3)	0.25075	0.663392	Benign	G	0.25	0.239992	0.226874	0.235909	0.770293	0.406872	0.150677	0.00606702	0.0123166	0.0223881	0.00420947	0.232715	0.235958	0.249624	0.231995	0.160247	0.238907	0.765003	0.373522	0.155172	0.00451031	0.238479	0.235558	0.268877	0.765625	0.762295	0.127907	0.00537634	0.247475	0.00485437	0.00952381	0.351064	0.914141	0.212121	0.203297	0.179612
2	109513601	A	G	rs3827760	EDAR	single nucleotide variant	NM_022336.3(EDAR):c.1109T>C (p.Val370Ala)	Hair morphology 1, hair thickness;Hypohidrotic Ectodermal Dysplasia, Dominant;not specified	eas(gnomAD.genomes)	0.277644	0.663154	Benign	G	0.0172414	0.00529139	0.00378588	0.00807305	0.0113452	0.511039	0.0188566	0.919121	0.89759	0.787671	0.926176	0.0541952	0.00801219	0.0112867	0.0136409	0.00903141	0.0951597	0.0130914	0.425532	0.0103448	0.940798	0.0544041	0.0114152	0.0709024	0	0.0327869	0.0523256	0.897849	0	0.936893	0.904762	0.239362	0	0.0555556	0	0.0145631
17	36485753	G	C	rs35803744	GPR179	single nucleotide variant	NM_001004334.3(GPR179):c.3699G= (p.Leu1233=)	Congenital Stationary Night Blindness, Recessive	GWD(1KG_phase3)	0.221814	0.663142	Benign	C	0.115702	0.128211	0.177094	0.135712	0.729199	0.117766	0.177528	0.115196	0.141173	0.149254	0.1078	0.129769	0.133799	0.138514	0.121304	0.0887197	0.164906	0.711835	0.14218	0.203448	0.113753	0.119965	0.131504	0.17098	0.729167	0.606557	0.0755814	0.0698925	0.126263	0.140777	0.138095	0.223404	0.808081	0.121212	0.131868	0.11165
17	62018109	T	C	rs2228995	SCN4A	single nucleotide variant	NM_000334.4(SCN4A):c.*22A>G	Congenital Myasthenic Syndrome, Recessive;Hyperkalemic Periodic Paralysis;Hypokalemic periodic paralysis;Paramyotonia congenita of von Eulenburg;Potassium aggravated myotonia	YRI(1KG_phase3)	0.110117	0.663031	Benign	C	0.00543478	0.00170616	0.00570489	0.00180979	0.588608	0.029167	0.0119347	0.000432579	0	0	0.000571895	5.6224e-05	0.00178473	0	0.000365408	0.00375857	0.0225	0.575524	0.034279	0.00689655	0.00128205	0	0.00155824	0.0294659	0.609375	0.540984	0	0	0	0	0.0047619	0.0531915	0.752525	0	0	0.00485437
2	179578704	G	A	rs13398235	TTN	single nucleotide variant	NM_133378.4(TTN):c.22949C>T (p.Pro7650Leu)	Cardiovascular phenotype;Dilated Cardiomyopathy, Dominant;Distal myopathy Markesbery-Griggs type;Hereditary myopathy with early respiratory failure;Hypertrophic cardiomyopathy;Limb-Girdle Muscular Dystrophy, Recessive;Myopathy, early-onset, with fatal cardiomyopathy;not specified	Taa_West(HuOrigin)	0.118338	0.662912	Likely_benign	A	0.0371901	0.0257572	0.0198944	0.0264033	0.15241	0.190286	0.040863	0.0284884	0.00371747	0	0.0354235	0.0576315	0.0263728	0.0296769	0.0297444	0.167201	0.059788	0.15343	0.166274	0.037931	0.0342377	0.0535406	0.025081	0.0514706	0.15625	0.221311	0.197674	0.0430108	0.030303	0.0145631	0.00952381	0.164894	0.176768	0.0707071	0.032967	0.165049
3	150658264	G	A	rs16846663	CLRN1	single nucleotide variant	NM_001195794.1(CLRN1):c.472+4C>T	not specified	Chukchis(HuOrigin)	0.098015	0.662854	Benign	A	0.00649351	0.00257046	0.00976562	0.00564656	0.0404732	0.0629941	0.00313707	0.32308	0.325431	0.3	0.322626	0.0346756	0.00382967	0.00714286	0.00502513	0.0389941	0.0347087	0.0404319	0.0459906	0.00344828	0.31982	0.0429147	0.00673837	0.0275735	0.0208333	0.0409836	0.0988372	0.290323	0	0.320388	0.290476	0.0744681	0.0151515	0.0252525	0	0.0339806
19	19303802	T	C	rs1050483	RFXANK	single nucleotide variant	NM_003721.3(RFXANK):c.-116T>C	MHC Class II Deficiency	Karitiana(HGDP)	0.230011	0.662846	Likely_benign	C	NA	NA	NA	NA	NA	NA	NA	NA	NA	NA	NA	NA	NA	NA	NA	NA	NA	0.227586	0.292453	0.124138	0.401035	0.0726644	0.12854	0.133517	0.229167	0.237705	0.25	0.419355	0.0959596	0.34466	0.433333	0.244681	0.227273	0.040404	0.120879	0.242718
18	19763011	A	G	rs3764962	GATA6	single nucleotide variant	NM_005257.5(GATA6):c.1620+7A>G	not specified	YRI(1KG_phase3)	0.13818	0.662746	Likely_benign	G	0	0.0104879	0.024456	0.0144141	0.637971	0.0777797	0.0162795	0.0536938	0.0652858	0.0855263	0.0502913	0.0175187	0.0132256	0.0221471	0.010496	0.0312234	0.0496246	0.63018	0.0851064	0.00689655	0.0494859	0.0184332	0.0135538	0.0606618	0.661458	0.639344	0.0697674	0.0645161	0.010101	0.0339806	0.0380952	0.0691489	0.676768	0.0151515	0.0164835	0.00970874
16	67316234	C	T	rs11860295	PLEKHG4	single nucleotide variant	NM_001129727.2(PLEKHG4):c.1235C>T (p.Thr412Ile)	not specified	BiakaPygmy(HGDP)	0.14896	0.660564	Likely_benign	T	0.0701754	0.0746151	0.079479	0.0736339	0.581801	0.0660081	0.0680681	0.00404416	0.000262605	0	0.00509066	0.141404	0.0786787	0.064751	0.092393	0.151979	0.0957025	0.574245	0.0813679	0.0655172	0.00579897	0.140219	0.074428	0.129596	0.630208	0.581967	0.133721	0.00537634	0.0656566	0.00970874	0	0.143617	0.641414	0.106061	0.0604396	0.160194
10	27381349	T	C	rs2297145	ANKRD26	single nucleotide variant	NM_014915.2(ANKRD26):c.624A>G (p.Val208=)	Thrombocytopenia;not specified	Papuan(HuOrigin)	0.339469	0.660531	Likely_benign	C	0.15	0.158044	0.18279	0.163299	0.311892	0.19514	0.217261	0.548752	0.533876	0.61194	0.552232	0.252707	0.164158	0.202652	0.163179	0.371887	0.207532	0.323516	0.183215	0.165517	0.564036	0.248848	0.164979	0.242173	0.265625	0.311475	0.348837	0.473118	0.156566	0.582524	0.557143	0.196809	0.277778	0.282828	0.186813	0.398058
16	8875545	G	C	rs737695	ABAT	single nucleotide variant	NM_020686.5(ABAT):c.*258G>C	Gamma-aminobutyric acid transaminase deficiency	BTQ(AAGC)	0.340568	0.659432	Benign	C	NA	NA	NA	NA	NA	NA	NA	NA	NA	NA	NA	NA	NA	NA	NA	NA	NA	0.291474	0.376179	0.268966	0.391979	0.314623	0.336756	0.308688	0.359375	0.344262	0.337209	0.33871	0.267677	0.315534	0.333333	0.335106	0.323232	0.282828	0.318681	0.286408
6	32814975	T	C	rs1135216	TAP1	single nucleotide variant	NM_000593.5(TAP1):c.2090A>G (p.Asp697Gly)	PEPTIDE TRANSPORTER PSF1 POLYMORPHISM;not specified	Hadza(HuOrigin)	0.205801	0.657836	Benign	C	0.125	0.134723	0.145461	0.140501	0.23332	0.18608	0.158583	0.159116	0.143793	0.117647	0.163608	0.17637	0.145614	0.123862	0.170513	0.217628	0.166115	0.237526	0.161557	0.175862	0.165167	0.174827	0.149753	0.176199	0.239583	0.278689	0.180233	0.11828	0.111111	0.184466	0.12381	0.132979	0.272727	0.176768	0.148352	0.179612
11	76922946	G	A	rs11237123	MYO7A	single nucleotide variant	NM_000260.3(MYO7A):c.6318G>A (p.Lys2106=)	Nonsyndromic Hearing Loss, Dominant;Nonsyndromic Hearing Loss, Recessive;Retinitis pigmentosa-deafness syndrome;not specified	MbutiPygmy(HGDP)	0.188703	0.657451	Likely_benign	A	0.272727	0.195806	0.218936	0.209908	0.367573	0.0980989	0.145386	0.0695449	0.0500262	0.0149254	0.0753815	0.277231	0.200568	0.227648	0.185655	0.087272	0.180225	0.367796	0.127358	0.175862	0.0731707	0.277202	0.203846	0.20442	0.385417	0.352459	0.0581395	0.0967742	0.232323	0.0339806	0.0666667	0.170213	0.424242	0.237374	0.252747	0.0873786
17	3564400	T	A	rs222754	CTNS	single nucleotide variant	NM_004937.2(CTNS):c.*737T>A	Cystinosis;Nephropathic cystinosis	BTQ(AAGC)	0.342561	0.657439	Benign	A	NA	NA	NA	NA	NA	NA	NA	NA	NA	NA	NA	NA	NA	NA	NA	NA	NA	0.125316	0.340426	0.388889	0.534106	0.217779	0.281632	0.266174	0.0989583	0.114754	0.389535	0.494624	0.232323	0.480583	0.528571	0.303191	0.0606061	0.227273	0.269231	0.378641
11	101323133	A	C	rs7931399	TRPC6	single nucleotide variant	NM_004621.5(TRPC6):c.*553T>G	Focal segmental glomerulosclerosis	MbutiPygmy(HGDP)	0.265792	0.657285	Benign	C	NA	NA	NA	NA	NA	NA	NA	NA	NA	NA	NA	NA	NA	NA	NA	NA	NA	0.601841	0.159198	0.22069	0.0482005	0.158607	0.211848	0.199449	0.625	0.5	0.174419	0.0322581	0.277778	0.0194175	0.052381	0.265957	0.712121	0.247475	0.230769	0.208738
16	51172677	G	A	rs11645288	SALL1	single nucleotide variant	NM_002968.2(SALL1):c.3456C>T (p.His1152=)	Townes-Brocks syndrome 1;not specified	Hadza(HuOrigin)	0.161004	0.657178	Benign	A	0.173554	0.199166	0.250218	0.217822	0.180303	0.132048	0.26791	0.032786	0.0217391	0.0131579	0.0359173	0.257881	0.211239	0.26012	0.201164	0.142722	0.207071	0.181264	0.166274	0.241379	0.0397436	0.250863	0.219289	0.205882	0.171875	0.188525	0.110465	0.0376344	0.217172	0.0291262	0.0285714	0.170213	0.20202	0.242424	0.186813	0.131068
2	73680508	G	C	rs6546839	ALMS1	single nucleotide variant	NM_015120.4(ALMS1):c.6857G>C (p.Arg2286Pro)	not specified	GWD(1KG_phase3)	0.269046	0.655733	Benign	C	0.258333	0.240337	0.22842	0.237066	0.784161	0.408206	0.204187	0.00607378	0.0123815	0.0227273	0.00420887	0.232884	0.236723	0.253378	0.232262	0.160345	0.244441	0.778547	0.376777	0.203448	0.00452196	0.239068	0.236185	0.271639	0.786458	0.778689	0.133721	0.00537634	0.247475	0.00485437	0.00952381	0.356383	0.919192	0.212121	0.203297	0.179612
2	73677898	G	C	rs6546837	ALMS1	single nucleotide variant	NM_015120.4(ALMS1):c.4247G>C (p.Gly1416Ala)	not specified	GWD(1KG_phase3)	0.269525	0.655254	Benign	C	0.264706	0.242401	0.228064	0.237724	0.784413	0.412459	0.170557	0.00619952	0.01252	0.0223881	0.00430846	0.233061	0.237695	0.254511	0.232414	0.16262	0.24557	0.781482	0.387805	0.195652	0.00478142	0.256481	0.251766	0.28937	0.786458	0.778689	0.127907	0.00537634	0.247475	0.00485437	0.00952381	0.351064	0.919192	0.212121	0.203297	0.179612
13	52536114	C	T	rs9535809	ATP7B	single nucleotide variant	NM_001005918.2(ATP7B):c.1869+2894G>A	not specified	MbutiPygmy(HGDP)	0.153648	0.654044	Benign	T	NA	NA	NA	NA	NA	NA	NA	NA	NA	NA	NA	NA	NA	NA	NA	NA	NA	0.408525	0.217494	0.0689655	0.0584833	0.0809332	0.0669822	0.120626	0.380208	0.418033	0.156977	0.0268817	0.0505051	0.0436893	0.0809524	0.180851	0.550505	0.111111	0.0549451	0.11165
3	37034946	G	A	rs1800734	MLH1	single nucleotide variant	NM_000249.3(MLH1):c.-93G>A	Hereditary cancer-predisposing syndrome;Lynch syndrome;Lynch syndrome II;not specified	Onge(HuOrigin)	0.346666	0.653334	Benign	A	NA	NA	NA	NA	NA	NA	NA	NA	NA	NA	NA	NA	NA	NA	NA	NA	NA	0.168006	0.34434	0.362069	0.568123	0.243235	0.222237	0.244485	0.171875	0.213115	0.366279	0.494624	0.20202	0.567961	0.571429	0.271277	0.186869	0.287879	0.274725	0.378641
5	73218954	C	T	rs423333	ARHGEF28	single nucleotide variant	NM_001080479.2(ARHGEF28):c.4991C>T (p.Pro1664Leu)	not specified	Pima(HGDP)	0.239886	0.652971	Benign	T	0.168831	0.170529	0.154948	0.167098	0.525421	0.408167	0.139961	0.118135	0.120579	0.2	0.117415	0.159288	0.169316	0.168776	0.180798	0.308187	0.196847	0.502764	0.377358	0.117241	0.126289	0.159379	0.170542	0.203499	0.494792	0.57377	0.27907	0.0860215	0.191919	0.11165	0.195238	0.335106	0.631313	0.207071	0.203297	0.296117
11	66460527	C	T	rs639938	SPTBN2	single nucleotide variant	NM_006946.3(SPTBN2):c.4899G>A (p.Leu1633=)	Spinocerebellar Ataxia, Dominant;not provided	Chukchis(HuOrigin)	0.086802	0.652329	Likely_benign	T	0.108333	0.0474302	0.0323535	0.0546295	0.0521167	0.0571106	0.025	0.112356	0.123887	0.0986842	0.109447	0.136164	0.0567293	0.053973	0.0847367	0.0696041	0.0643952	0.0532966	0.0601415	0.0241379	0.100386	0.147381	0.0752207	0.0837937	0.0729167	0.0409836	0.0988372	0.0860215	0.0454545	0.150485	0.166667	0.0691489	0.0454545	0.141414	0.0604396	0.0728155
2	233633460	G	A	rs1801251	KCNJ13	single nucleotide variant	NM_002242.4(KCNJ13):c.524C>T (p.Thr175Ile)	Leber congenital amaurosis	Onge(HuOrigin);Papuan(HuOrigin);Papuan(HGDP)	0.347939	0.652061	Likely_benign	A	0.256198	0.355978	0.320533	0.338833	0.26488	0.251267	0.336609	0.325795	0.254727	0.263158	0.345323	0.238314	0.339511	0.322532	0.324779	0.636481	0.343677	0.267878	0.299054	0.331034	0.356684	0.231124	0.3246	0.306066	0.255208	0.311475	0.639535	0.397849	0.323232	0.296117	0.361905	0.308511	0.242424	0.207071	0.351648	0.684466
2	73679990	T	A	rs6724782	ALMS1	single nucleotide variant	NM_015120.4(ALMS1):c.6339T>A (p.Ser2113Arg)	not specified	GWD(1KG_phase3)	0.26865	0.651704	Benign	A	0.262712	0.240295	0.228075	0.236749	0.784045	0.407957	0.203626	0.00608123	0.0124602	0.0223881	0.00420887	0.232706	0.23666	0.255295	0.232342	0.160331	0.244426	0.778327	0.374704	0.203448	0.00449294	0.23863	0.23662	0.27214	0.786458	0.778689	0.127907	0.00537634	0.247475	0.00485437	0.00952381	0.356383	0.919192	0.212121	0.203297	0.179612
16	48258198	C	T	rs17822931	ABCC11	single nucleotide variant	NM_032583.3(ABCC11):c.538G>A (p.Gly180Arg)	Apocrine gland secretion, variation in;Axillary odor;Colostrum secretion	TBN(AAGC)	0.348525	0.651475	Benign	T	0.157025	0.126965	0.0982594	0.126115	0.0266593	0.161664	0.107668	0.869778	0.987159	0.828947	0.839137	0.235202	0.128753	0.132132	0.147559	0.406033	0.169113	0.0302021	0.156028	0.106897	0.871465	0.244246	0.142477	0.189338	0.046875	0.0491803	0.546512	0.537634	0.131313	0.970874	0.842857	0.106383	0	0.242424	0.10989	0.398058
6	76625079	T	C	rs699186	MYO6	single nucleotide variant	NM_004999.3(MYO6):c.*350T>C	Nonsyndromic Hearing Loss, Dominant;Nonsyndromic Hearing Loss, Recessive	Karitiana(HuOrigin)	0.349708	0.650292	Likely_benign	C	NA	NA	NA	NA	NA	NA	NA	NA	NA	NA	NA	NA	NA	NA	NA	NA	NA	0.185718	0.568558	0.448276	0.373874	0.399827	0.394853	0.382136	0.135417	0.278689	0.360465	0.446237	0.338384	0.315534	0.442857	0.5	0.19697	0.378788	0.373626	0.475728
5	176637240	G	T	rs3733875	NSD1	single nucleotide variant	NM_022455.4(NSD1):c.1840G>T (p.Val614Leu)	Neurodevelopmental;Sotos Syndrome;Weaver syndrome;not specified	Eskimo(HuOrigin)	0.236478	0.649886	Benign	T	0.233051	0.114293	0.100357	0.118817	0.074788	0.234814	0.112286	0.516535	0.497375	0.378378	0.52318	0.184298	0.118418	0.125	0.130502	0.214693	0.153538	0.0726103	0.205189	0.103448	0.51943	0.197353	0.142347	0.170956	0.0833333	0.0901639	0.319767	0.5	0.0858586	0.567961	0.514286	0.138298	0.0505051	0.161616	0.131868	0.252427
2	233632766	T	C	rs8192539	KCNJ13	single nucleotide variant	NM_002242.4(KCNJ13):c.*135A>G	Leber congenital amaurosis	Papuan(HGDP)	0.174413	0.649117	Likely_benign	C	NA	NA	NA	NA	NA	NA	NA	NA	NA	NA	NA	NA	NA	NA	NA	NA	NA	0.0913373	0.163915	0.131034	0.115039	0.12867	0.171705	0.160846	0.078125	0.131148	0.331395	0.182796	0.176768	0.092233	0.138095	0.175532	0.0707071	0.126263	0.17033	0.42233
9	4576774	G	A	rs1471786	SLC1A1	single nucleotide variant	NM_004170.5(SLC1A1):c.1193+11G>A	Dicarboxylic aminoaciduria	Karitiana(HuOrigin)	0.185531	0.647803	Benign	A	0.136364	0.124298	0.0758789	0.120994	0.124539	0.27629	0.0529716	0.427958	0.420639	0.348684	0.430731	0.244659	0.121899	0.100825	0.141451	0.128569	0.148172	0.124742	0.248821	0.0517241	0.442857	0.251152	0.13259	0.161765	0.0885417	0.172131	0.209302	0.38172	0.141414	0.42233	0.419048	0.255319	0.0959596	0.262626	0.104396	0.135922
2	73679280	A	G	rs6546838	ALMS1	single nucleotide variant	NM_015120.4(ALMS1):c.5629A>G (p.Ile1877Val)	not specified	ESN(1KG_phase3)	0.261501	0.64759	Benign	G	0.264463	0.240593	0.228152	0.236739	0.770946	0.406684	0.186419	0.00607242	0.0124011	0.0223881	0.00420647	0.233033	0.236778	0.254129	0.232428	0.160446	0.241476	0.765358	0.371734	0.171329	0.00451031	0.239481	0.236935	0.268089	0.765625	0.762295	0.127907	0.00537634	0.247475	0.00485437	0.00952381	0.356383	0.909091	0.212121	0.203297	0.179612
3	155571275	T	C	rs3804769	SLC33A1	single nucleotide variant	NM_004733.3(SLC33A1):c.512A>G (p.Asp171Gly)	Spastic paraplegia, autosomal dominant;not specified	BTQ(AAGC)	0.103178	0.646822	Benign	C	0.0454545	0.0530781	0.0558261	0.0559502	0.11369	0.0711105	0.0380036	0.186698	0.173913	0.131579	0.190664	0.0532151	0.0558321	0.0547226	0.0603521	0.158729	0.0586701	0.107751	0.0839243	0.0277778	0.200517	0.0535098	0.0538102	0.072744	0.140625	0.147541	0.180233	0.150538	0.0656566	0.135922	0.185714	0.0691489	0.151515	0.0808081	0.043956	0.15534
10	27830456	A	G	rs11597728	RAB18	single nucleotide variant	NM_021252.4(RAB18):c.*3476A>G	Warburg micro syndrome	Papuan(HGDP)	0.236033	0.64632	Benign	G	0.130769	0.151802	0.187793	0.166135	0.189717	0.27661	0.171856	0.328476	0.293897	0.5	0.335828	0.163558	0.157471	0.186992	0.157963	0.255923	0.193216	0.190884	0.251196	0.172414	0.314863	0.168113	0.149359	0.173832	0.166667	0.213115	0.296512	0.365591	0.166667	0.320388	0.342857	0.228723	0.171717	0.191919	0.192308	0.199029
4	41746460	C	T	rs6826373	PHOX2B	single nucleotide variant	NM_003924.3(PHOX2B):c.*1364G>A	Congenital central hypoventilation;Neuroblastoma	MbutiPygmy(HGDP)	0.354237	0.645763	Benign	T	NA	NA	NA	NA	NA	NA	NA	NA	NA	NA	NA	NA	NA	NA	NA	NA	NA	0.705184	0.229314	0.427083	0.172237	0.377016	0.328785	0.340406	0.760417	0.639344	0.337209	0.139785	0.388889	0.18932	0.161905	0.31383	0.737374	0.363636	0.302198	0.427184
6	132213001	G	A	rs9493120	ENPP1	single nucleotide variant	NM_006208.3(ENPP1):c.*1350G>A	Arterial calcification of infancy;Hypophosphatemic Rickets, Recessive	MbutiPygmy(HGDP)	0.085686	0.645083	Benign	A	NA	NA	NA	NA	NA	NA	NA	NA	NA	NA	NA	NA	NA	NA	NA	NA	NA	0.300163	0.0644769	0.0275862	0.00064433	0.0153657	0.0431622	0.0663551	0.328125	0.295082	0.0348837	0	0.0606061	0	0	0.0744681	0.247475	0.0151515	0.043956	0.0242718
22	50297435	T	C	rs1321	ALG12	single nucleotide variant	NM_024105.3(ALG12):c.*51A>G	Congenital disorder of glycosylation	BiakaPygmy(HGDP)	0.332383	0.643808	Benign	C	0.232759	0.201064	0.219383	0.209227	0.743538	0.152181	0.305234	0.133118	0.130688	0.176471	0.133347	0.164831	0.205006	0.200848	0.200285	0.428104	0.232439	0.731592	0.199292	0.303448	0.130631	0.176267	0.207559	0.241252	0.78125	0.663934	0.383721	0.16129	0.247475	0.150485	0.214286	0.223404	0.868687	0.166667	0.197802	0.378641
15	43028749	T	A	rs4265781	CDAN1	single nucleotide variant	NM_138477.2(CDAN1):c.320A>T (p.Gln107Leu)	Congenital dyserythropoietic anemia;Congenital dyserythropoietic anemia, type I;not specified	YRI(1KG_phase3)	0.352177	0.643193	Benign	A	0.215909	0.224676	0.284281	0.231044	0.846863	0.139705	0.322416	0.276375	0.296844	0	0.270943	0.244533	0.228699	0.207692	0.220183	0.433022	0.274961	0.839991	0.180693	0.318182	0.22987	0.258497	0.225708	0.304554	0.911458	0.844262	0.360465	0.274194	0.212121	0.271845	0.209524	0.223404	0.984848	0.212121	0.21978	0.524272
17	44067382	T	C	rs2258689	MAPT	single nucleotide variant	NM_001123066.3(MAPT):c.1321T>C (p.Tyr441His)	not provided;not specified	Papuan(HGDP)	0.327464	0.643124	Benign	C	0.181818	0.19864	0.200522	0.205975	0.14501	0.377784	0.204563	0.63196	0.626768	0.565789	0.634031	0.290981	0.20905	0.219476	0.232453	0.32864	0.263441	0.151759	0.354953	0.182759	0.63543	0.286413	0.215381	0.264273	0.125	0.229508	0.406977	0.645161	0.186869	0.665049	0.6	0.271277	0.181818	0.257576	0.181319	0.378641
4	169606649	C	A	rs62333891	PALLD	single nucleotide variant	NM_001166108.1(PALLD):c.1274C>A (p.Thr425Asn)	Carcinoma of pancreas	Karitiana(HuOrigin)	0.107201	0.642799	Benign	A	0.0702479	0.0790721	0.053382	0.0768685	0.177104	0.272312	0.0231151	0.0818745	0.079099	0.0460526	0.0829867	0.154954	0.0804231	0.0666667	0.100222	0.0794683	0.0963168	0.181891	0.222877	0.0104167	0.100641	0.148244	0.0784657	0.11326	0.203125	0.188525	0.0988372	0.0591398	0.0707071	0.0631068	0.12381	0.207447	0.212121	0.136364	0.0989011	0.0679612
4	71510836	C	G	rs7664896	ENAM	single nucleotide variant	NM_031889.2(ENAM):c.*264C>G	Amelogenesis Imperfecta, Dominant	LWK(1KG_phase3)	0.155293	0.642687	Benign	G	NA	NA	NA	NA	NA	NA	NA	NA	NA	NA	NA	NA	NA	NA	NA	NA	NA	0.580046	0.136792	0.09375	0.0166881	0.0434407	0.0412612	0.0847145	0.645833	0.614754	0.0755814	0.0430108	0.030303	0.00970874	0.0047619	0.132979	0.782828	0.0454545	0.0714286	0.0533981
13	23908034	A	G	rs2737700	SACS	single nucleotide variant	NM_014363.5(SACS):c.9981T>C (p.Ala3327=)	Spastic ataxia Charlevoix-Saguenay type;not provided;not specified	Onge(HuOrigin)	0.357657	0.642343	Likely_benign	G	0.402542	0.449236	0.413165	0.439655	0.167162	0.426558	0.376542	0.396856	0.387376	0.453333	0.398779	0.449755	0.442182	0.422297	0.448977	0.39549	0.425738	0.174747	0.456161	0.368966	0.375644	0.454545	0.445823	0.40884	0.15625	0.163934	0.453488	0.451613	0.454545	0.34466	0.4	0.425532	0.0707071	0.414141	0.467033	0.378641
6	32010732	T	G	rs1135809	TNXB	single nucleotide variant	NM_019105.6(TNXB):c.11915A>C (p.Asn3972Thr)	not specified	nfe_seu(gnomAD.exomes);nfe_bgr(gnomAD.exomes)	0.357796	0.642204	Benign	G	0.362069	0.407368	1	0.476562	0.25177	0.522401	0.652448	0.24114	0.316901	NA	0.217604	0.351429	0.420694	1	0	0.375127	0.421277	0	NA	NA	NA	0	0	NA	0.239583	0.311475	0.523256	0.204301	0.454545	0.242718	0.161905	0.457447	0.262626	0.439394	0.434066	0.461165
2	31749714	C	T	rs1042578	SRD5A2	single nucleotide variant	NM_000348.3(SRD5A2):c.*1552G>A	3-Oxo-5 alpha-steroid delta 4-dehydrogenase deficiency;not provided	Ju_hoan_North(HuOrigin)	0.176074	0.642108	Benign	T	NA	NA	NA	NA	NA	NA	NA	NA	NA	NA	NA	NA	NA	NA	NA	NA	NA	0.242867	0.0931604	0.288194	0.0835476	0.1327	0.119956	0.133272	0.286458	0.204918	0.180233	0.123656	0.0757576	0.101942	0.114286	0.154255	0.257576	0.111111	0.153846	0.135922
4	55152040	C	T	rs2228230	PDGFRA	single nucleotide variant	NM_006206.5(PDGFRA):c.2472C>T (p.Val824=)	Gastrointestinal stroma tumor;Idiopathic hypereosinophilic syndrome;not specified	Onge(HuOrigin)	0.177649	0.640533	Benign	T	0.103306	0.148752	0.124717	0.139992	0.329355	0.314195	0.0740373	0.140659	0.120807	0.210526	0.145175	0.12701	0.141931	0.109738	0.144448	0.217403	0.153997	0.327114	0.293144	0.0659722	0.132391	0.123489	0.137649	0.165746	0.322917	0.270492	0.30814	0.16129	0.171717	0.160194	0.147619	0.159574	0.39899	0.126263	0.181319	0.23301
4	16020162	C	T	rs2286455	PROM1	single nucleotide variant	NM_006017.2(PROM1):c.786G>A (p.Ala262=)	Cone-Rod Dystrophy, Dominant;Retinal Macular Dystrophy;Retinitis Pigmentosa, Recessive;Stargardt Disease, Dominant;not specified	Pima(HGDP)	0.14526	0.640454	Likely_benign	T	0.0974576	0.105514	0.133187	0.1148	0.0436474	0.201622	0.130367	0.246853	0.250543	0.295455	0.245319	0.118004	0.114739	0.148163	0.120218	0.193237	0.127593	0.0440974	0.179669	0.165517	0.238739	0.12212	0.122421	0.122243	0.015625	0.0409836	0.197674	0.204301	0.0707071	0.213592	0.180952	0.106383	0.030303	0.10101	0.0659341	0.237864
6	135621600	C	G	rs4896141	AHI1	single nucleotide variant	NM_017651.4(AHI1):c.3485+38G>C	not specified	YRI(1KG_phase3)	0.169746	0.640439	Benign	G	0.087963	0.0689982	0.0629445	0.0693913	0.61254	0.0904857	0.0442055	0.0656259	0.083433	0.059322	0.0599576	0.0257465	0.0678776	0.0634991	0.0649173	0.101403	0.0794716	0.607784	0.106383	0.0482759	0.0616967	0.0264535	0.0670264	0.102778	0.682292	0.540984	0.0988372	0.0537634	0.0606061	0.0728155	0.0666667	0.111702	0.747475	0.030303	0.0769231	0.101942
15	43023482	T	C	rs12917189	CDAN1	single nucleotide variant	NM_138477.4(CDAN1):c.1787A>G (p.Gln596Arg)	Congenital dyserythropoietic anemia;Congenital dyserythropoietic anemia, type I;not specified	BiakaPygmy(HuOrigin);Damara(HuOrigin);Ju_hoan_North(HuOrigin);Mandenka(HuOrigin);BantuKenya(HGDP);BiakaPygmy(HGDP)	0.359944	0.640056	Benign	C	0.239669	0.204544	0.208225	0.210205	0.8455	0.125882	0.301349	0.261446	0.27187	0.210526	0.259223	0.250486	0.206929	0.236704	0.202978	0.435226	0.252525	0.835787	0.167453	0.303448	0.231314	0.255472	0.209644	0.299263	0.911458	0.844262	0.360465	0.284946	0.19697	0.276699	0.209524	0.212766	0.984848	0.217172	0.192308	0.524272
9	27556780	G	A	rs10122902	C9orf72	single nucleotide variant	NM_001256054.2(C9orf72):c.870C>T (p.Ser290=)	Amyotrophic Lateral Sclerosis/Frontotemporal Dementia;Amyotrophic lateral sclerosis and/or frontotemporal dementia 1	Karitiana(HGDP)	0.217329	0.639814	Benign	A	0.220833	0.197896	0.187401	0.204407	0.183317	0.330876	0.147804	0.313751	0.270964	0.197368	0.326304	0.231535	0.206913	0.210428	0.23218	0.259314	0.214145	0.187227	0.28184	0.127586	0.308237	0.237464	0.199715	0.229705	0.166667	0.180328	0.302326	0.284946	0.136364	0.325243	0.338095	0.196809	0.146465	0.191919	0.142857	0.228155
22	44324730	C	T	rs738408	PNPLA3	single nucleotide variant	NM_025225.2(PNPLA3):c.447C>T (p.Pro149=)	Susceptibility to Nonalcoholic Fatty Liver Disease	Nganasans(HuOrigin)	0.269957	0.639134	Likely_benign	T	0.260331	0.221487	0.277536	0.233723	0.136526	0.550434	0.218769	0.381168	0.421646	0.506579	0.369112	0.226093	0.228577	0.251874	0.209708	0.221383	0.279647	0.139042	0.50237	0.239583	0.381323	0.226382	0.224318	0.232472	0.130208	0.172131	0.244186	0.231183	0.217172	0.383495	0.390476	0.409574	0.126263	0.171717	0.252747	0.31068
10	27317840	C	T	rs10829163	ANKRD26	single nucleotide variant	NM_014915.2(ANKRD26):c.3913G>A (p.Val1305Ile)	Thrombocytopenia;not specified	Papuan(HGDP)	0.302188	0.638988	Likely_benign	T	0.140496	0.136956	0.168047	0.144382	0.226502	0.181697	0.194052	0.550409	0.529831	0.61194	0.55542	0.239015	0.144726	0.18858	0.143017	0.349931	0.184385	0.226007	0.169811	0.155172	0.567481	0.23206	0.148765	0.225599	0.213542	0.270492	0.337209	0.483871	0.116162	0.587379	0.571429	0.18617	0.186869	0.272727	0.153846	0.373786
2	29445458	G	T	rs3795850	ALK	single nucleotide variant	NM_004304.4(ALK):c.3375C>A (p.Gly1125=)	Hereditary cancer-predisposing syndrome;Neuroblastoma 3;Neuroblastoma Susceptibility;not provided;not specified	Karitiana(HGDP)	0.363031	0.636969	Likely_benign	T	0.256198	0.211637	0.202239	0.210501	0.258587	0.596178	0.160636	0.737313	0.712788	0.697368	0.744254	0.314511	0.213349	0.181852	0.227196	0.390738	0.272965	0.253749	0.536643	0.2	0.74031	0.31394	0.213608	0.28321	0.244792	0.303279	0.563953	0.731183	0.217172	0.694175	0.728571	0.303191	0.20202	0.333333	0.236264	0.402913
6	38729511	T	C	rs61748600	DNAH8	single nucleotide variant	NM_001206927.1(DNAH8):c.1549T>C (p.Tyr517His)	not specified	Eskimo(HuOrigin)	0.113119	0.636881	Benign	C	0.175258	0.153163	0.126808	0.15182	0.0568217	0.267976	0.108818	0.0106399	0.0198437	0.0202703	0.00745527	0.11963	0.14575	0.13341	0.139802	0.0531784	0.130407	0.05881	0.251179	0.12069	0.0128205	0.125435	0.155293	0.140481	0.0625	0.057377	0.0348837	0.016129	0.186869	0.0291262	0.00952381	0.223404	0.040404	0.136364	0.159341	0.0145631
5	1255520	G	A	rs33954691	TERT	single nucleotide variant	NM_198253.2(TERT):c.3039C>T (p.His1013=)	Aplastic anemia;Dyskeratosis Congenita, Recessive;Dyskeratosis congenita autosomal dominant;Idiopathic fibrosing alveolitis, chronic form;not specified	Karitiana(HuOrigin)	0.154821	0.636846	Benign	A	0.125	0.104694	0.105933	0.103023	0.0206825	0.243664	0.122317	0.178484	0.2923	0.335821	0.145976	0.094429	0.101767	0.0960961	0.0941262	0.164074	0.124298	0.022941	0.242317	0.141379	0.156812	0.0940736	0.101012	0.10386	0	0.0327869	0.197674	0.0913978	0.141414	0.179612	0.133333	0.132979	0	0.10101	0.0989011	0.116505
19	11687908	G	A	rs62638747	ACP5	single nucleotide variant	NM_001111035.2(ACP5):c.225C>T (p.Phe75=)	not specified	Papuan(HuOrigin)	0.07841	0.635876	Benign	A	0.0991736	0.124437	0.136996	0.125	0.0382675	0.0647875	0.122743	0.0205502	0.0251441	0.0328947	0.0192041	0.150291	0.12196	0.135307	0.106582	0.093748	0.127445	0.0346375	0.0625	0.151724	0.024453	0.166379	0.123375	0.11489	0.0364583	0.0245902	0.0697674	0.016129	0.111111	0.0194175	0.0380952	0.0904255	0.020202	0.161616	0.10989	0.0970874
1	209788514	G	A	rs2566	LAMB3	single nucleotide variant	NM_000228.2(LAMB3):c.*102C>T	Epidermolysis bullosa, junctional	Karitiana(HuOrigin)	0.322702	0.635632	Benign	A	NA	NA	NA	NA	NA	NA	NA	NA	NA	NA	NA	NA	NA	NA	NA	NA	NA	0.250058	0.406398	0.175862	0.348446	0.269297	0.279431	0.28321	0.21875	0.229508	0.337209	0.349462	0.267677	0.354369	0.380952	0.420213	0.232323	0.242424	0.32967	0.23301
1	6533393	G	C	rs61741379	PLEKHG5	single nucleotide variant	NM_020631.4(PLEKHG5):c.713C>G (p.Thr238Ser)	Distal spinal muscular atrophy;not specified	GWD(1KG_phase3)	0.200667	0.635616	Benign	C	0.229592	0.133217	0.171161	0.146934	0.644538	0.0990447	0.142129	0.00716382	0.0114784	0.0357143	0.00598802	0.167869	0.140636	0.155009	0.146928	0.162131	0.156911	0.64215	0.128538	0.144828	0.00192555	0.162061	0.145082	0.1875	0.671875	0.598361	0.151163	0.00537634	0.126263	0.00970874	0	0.180851	0.717172	0.126263	0.131868	0.281553
4	5690902	T	C	rs4689278	EVC2	single nucleotide variant	NM_147127.4(EVC2):c.688A>G (p.Ser230Gly)	Ellis-van Creveld Syndrome;not specified	Onge(HuOrigin)	0.274506	0.634584	Benign	C	0.173554	0.214347	0.244516	0.209049	0.195952	0.252327	0.219885	0.39789	0.353588	0.315789	0.410484	0.230716	0.213898	0.224138	0.204791	0.260419	0.234039	0.191139	0.268322	0.227586	0.397815	0.228999	0.207776	0.226103	0.21875	0.245902	0.273256	0.489247	0.222222	0.407767	0.319048	0.260638	0.242424	0.227273	0.181319	0.223301
3	67411103	C	T	rs902320	SUCLG2	single nucleotide variant	NM_001177599.1(SUCLG2):c.1273G>A (p.Val425Ile)	not specified	Papuan(HGDP)	0.218804	0.634137	Benign	T	0.337662	0.263697	0.202255	0.253725	0.188248	0.232475	0.139577	0.259923	0.268266	0.1	0.258495	0.352841	0.260741	0.190647	0.332258	0.22383	0.217734	0.205747	0.257075	0.127586	0.260618	0.330933	0.291018	0.267035	0.182292	0.172131	0.22093	0.247312	0.262626	0.291262	0.304762	0.196809	0.171717	0.348485	0.291209	0.174757
17	32579788	A	G	rs1024611	CCL2	single nucleotide variant	NG_012123.1:g.2493A>G	Coronary artery disease, development of, in hiv;Coronary artery disease, modifier of;Mycobacterium tuberculosis, susceptibility to;Spina bifida, susceptibility to	Karitiana(HGDP)	0.366424	0.633576	Pathogenic	G	NA	NA	NA	NA	NA	NA	NA	NA	NA	NA	NA	NA	NA	NA	NA	NA	NA	0.195492	0.489362	0.241379	0.559923	0.350029	0.27501	0.31768	0.223958	0.270492	0.412791	0.413978	0.323232	0.635922	0.595238	0.414894	0.207071	0.363636	0.324176	0.26699
15	89754954	G	A	rs950541	RLBP1	single nucleotide variant	NM_000326.4(RLBP1):c.684+20C>T	not specified	Onge(HuOrigin)	0.275678	0.633413	Benign	A	0.454545	0.385815	0.347113	0.385312	0.173926	0.239516	0.331911	0.190479	0.187271	0.171053	0.191534	0.43264	0.383309	0.417417	0.38865	0.37424	0.351828	0.180753	0.261792	0.3	0.178434	0.416235	0.41243	0.385609	0.104167	0.172131	0.366279	0.193548	0.383838	0.203883	0.214286	0.255319	0.126263	0.444444	0.362637	0.38835
12	103232766	C	T	rs1801153	PAH	single nucleotide variant	NM_000277.2(PAH):c.*187G>A	Phenylketonuria	BantuKenya(HGDP);Mandenka(HGDP)	0.230381	0.633256	Benign	T	NA	NA	NA	NA	NA	NA	NA	NA	NA	NA	NA	NA	NA	NA	NA	NA	NA	0.58128	0.385071	0.182759	0.00641849	0.192396	0.201648	0.233826	0.640625	0.622951	0.133721	0.0107527	0.232323	0.00485437	0.00952381	0.297872	0.59596	0.181818	0.175824	0.116505
11	64503363	G	A	rs10897524	RASGRP2	single nucleotide variant	NM_153819.1(RASGRP2):c.1173+12C>T	not specified	Papuan(HuOrigin)	0.22414	0.633003	Benign	A	0.121739	0.0946023	0.100106	0.0983899	0.212276	0.303035	0.140553	0.396087	0.440252	0.359155	0.384621	0.114821	0.0948116	0.0924789	0.0886061	0.154085	0.13719	0.20422	0.278436	0.144828	0.410668	0.118444	0.0987269	0.117811	0.229167	0.155738	0.209302	0.33871	0.121212	0.466019	0.390476	0.218085	0.19697	0.0707071	0.0769231	0.145631
7	4833639	A	C	rs2880933	AP5Z1	single nucleotide variant	NM_014855.3(AP5Z1):c.*2623A>C	Spastic Paraplegia, Recessive	YRI(1KG_phase3)	0.297717	0.632838	Benign	C	NA	NA	NA	NA	NA	NA	NA	NA	NA	NA	NA	NA	NA	NA	NA	NA	NA	0.777688	0.125	0.217241	0.0621795	0.0569948	0.117819	0.146026	0.880208	0.704918	0.290698	0.0376344	0.116162	0.0339806	0.0666667	0.148936	0.90404	0.030303	0.17033	0.291262
11	123500759	C	T	rs2027767	SCN3B	single nucleotide variant	NM_018400.3(SCN3B):c.*3748G>A	Brugada syndrome	MbutiPygmy(HGDP)	0.290621	0.632456	Likely_benign	T	NA	NA	NA	NA	NA	NA	NA	NA	NA	NA	NA	NA	NA	NA	NA	NA	NA	0.437788	0.171395	0.175862	0.370347	0.235328	0.197688	0.240809	0.489583	0.336066	0.162791	0.268817	0.121212	0.378641	0.357143	0.180851	0.505051	0.20202	0.175824	0.339806
11	121181848	A	G	rs2115925	SC5D	single nucleotide variant	NM_006918.4(SC5D):c.*3627A>G	Lathosterolosis	BTQ(AAGC)	0.200955	0.632378	Benign	G	NA	NA	NA	NA	NA	NA	NA	NA	NA	NA	NA	NA	NA	NA	NA	NA	NA	0.104937	0.206856	0.0655172	0.2638	0.078053	0.0763745	0.0902394	0.119792	0.0983607	0.19186	0.22043	0.0959596	0.320388	0.247619	0.159574	0.121212	0.0757576	0.0824176	0.0728155
17	7592168	C	G	rs2287499	TP53;WRAP53	single nucleotide variant	NM_018081.2(WRAP53):c.202C>G (p.Arg68Gly)	Dyskeratosis Congenita, Recessive;Li-Fraumeni syndrome;not specified	YRI(1KG_phase3)	0.302872	0.632313	Benign	G	0.1375	0.111956	0.13201	0.12278	0.773168	0.202325	0.113419	0.309216	0.23363	0.209459	0.330258	0.0608945	0.117924	0.140555	0.113119	0.262448	0.163299	0.767126	0.214623	0.100694	0.328794	0.0635788	0.119935	0.168199	0.833333	0.745902	0.267442	0.424731	0.121212	0.296117	0.280952	0.207447	0.924242	0.10101	0.142857	0.213592
16	8873456	T	C	rs1079348	ABAT	single nucleotide variant	NM_020686.5(ABAT):c.1381+9T>C	Gamma-aminobutyric acid transaminase deficiency;not provided	BTQ(AAGC)	0.327563	0.63077	Benign	C	0.322314	0.291138	0.300632	0.298631	0.437801	0.228286	0.310526	0.352498	0.312991	0.309211	0.363459	0.230777	0.289755	0.304069	0.270445	0.342601	0.294243	0.431598	0.240521	0.258621	0.382924	0.223533	0.292333	0.275322	0.416667	0.401639	0.377907	0.349462	0.272727	0.320388	0.347619	0.244681	0.520202	0.212121	0.307692	0.271845
17	46020698	C	T	rs11079804	PNPO	single nucleotide variant	NM_018129.3(PNPO):c.165C>T (p.Ser55=)	Pyridoxal 5'-phosphate-dependent epilepsy;Seizures;not provided;not specified	Onge(HuOrigin)	0.187786	0.630396	Benign	T	0.169421	0.167093	0.171451	0.17126	0.0691522	0.297523	0.203373	0.185916	0.197486	0.157895	0.183148	0.125647	0.166781	0.167667	0.158792	0.245166	0.182959	0.0655267	0.271327	0.196552	0.190231	0.123201	0.170021	0.161142	0.0677083	0.0655738	0.261628	0.145161	0.171717	0.252427	0.17619	0.132979	0.030303	0.146465	0.142857	0.262136
18	48609968	A	G	rs12456284	SMAD4	single nucleotide variant	NM_005359.5(SMAD4):c.*5131A>G	Juvenile Polyposis;Myhre syndrome;Osler hemorrhagic telangiectasia syndrome	Papuan(HuOrigin)	0.263121	0.629736	Benign	G	NA	NA	NA	NA	NA	NA	NA	NA	NA	NA	NA	NA	NA	NA	NA	NA	NA	0.0514588	0.266588	0.293103	0.335927	0.283024	0.243872	0.236499	0.0104167	0.0737705	0.139535	0.301075	0.212121	0.393204	0.333333	0.212766	0	0.282828	0.197802	0.169903
10	73558952	C	T	rs4747195	CDH23	single nucleotide variant	NM_022124.5(CDH23):c.7139C>T (p.Pro2380Leu)	Nonsyndromic Hearing Loss, Recessive;Retinitis pigmentosa-deafness syndrome;not specified	Pima(HGDP)	0.298947	0.629624	Likely_benign	T	0.22314	0.2848	0.222534	0.256421	0.245898	0.428389	0.210338	0.529628	0.506286	0.574627	0.535561	0.346772	0.268837	0.196469	0.285924	0.229243	0.280734	0.250461	0.404255	0.196552	0.532342	0.3365	0.260754	0.286506	0.260417	0.286885	0.343023	0.494624	0.272727	0.514563	0.485714	0.244681	0.212121	0.328283	0.32967	0.300971
2	215876371	T	C	rs10198064	ABCA12	single nucleotide variant	NM_173076.2(ABCA12):c.2124A>G (p.Ala708=)	Congenital ichthyosiform erythroderma;not specified	Khomani(HuOrigin)	0.234888	0.628748	Benign	C	0.0371901	0.089771	0.133792	0.0907563	0.624046	0.25444	0.123239	0.0414356	0.0406397	0.0657895	0.0413894	0.0340017	0.0885829	0.112734	0.0622273	0.161058	0.152692	0.6172	0.268322	0.144828	0.0425258	0.0339471	0.0804128	0.105166	0.739583	0.532787	0.156977	0.0430108	0.0959596	0.038835	0.0380952	0.260638	0.666667	0.030303	0.0604396	0.169903
6	24534193	C	A	rs1054899	ALDH5A1	single nucleotide variant	NM_001080.3(ALDH5A1):c.*253C>A	Succinate-semialdehyde dehydrogenase deficiency	MbutiPygmy(HGDP)	0.333169	0.628369	Benign	A	NA	NA	NA	NA	NA	NA	NA	NA	NA	NA	NA	NA	NA	NA	NA	NA	NA	0.629804	0.250591	0.358621	0.190629	0.373993	0.336976	0.376611	0.5625	0.590164	0.302326	0.134409	0.308081	0.184466	0.22381	0.287234	0.691919	0.444444	0.384615	0.291262
17	3563963	C	G	rs2873624	CTNS	single nucleotide variant	NM_001031681.2(CTNS):c.1138C>G (p.Pro380Ala)	Cystinosis;Nephropathic cystinosis;not provided;not specified	BTQ(AAGC)	0.288585	0.628082	Benign	G	0.225	0.256809	0.240157	0.244365	0.0421546	0.319136	0.268765	0.514309	0.454688	0.440789	0.530881	0.211777	0.249207	0.244352	0.247357	0.226744	0.242498	0.0456946	0.297872	0.289655	0.528351	0.207661	0.246237	0.22417	0.03125	0.0491803	0.226744	0.483871	0.191919	0.480583	0.509524	0.255319	0	0.207071	0.225275	0.174757
2	152496526	A	G	rs6713162	NEB	single nucleotide variant	NM_004543.4(NEB):c.8734T>C (p.Ser2912Pro)	Nemaline Myopathy, Recessive;not provided;not specified	Papuan(HGDP)	0.372085	0.627915	Benign	G	0.136364	0.157495	0.15856	0.158824	0.643522	0.13831	0.247017	0.59399	0.576298	0.708955	0.597704	0.140191	0.157999	0.149775	0.158638	0.342571	0.215917	0.636468	0.136792	0.255172	0.591377	0.141705	0.156177	0.191529	0.645833	0.622951	0.406977	0.693548	0.186869	0.61165	0.6	0.138298	0.722222	0.166667	0.175824	0.31068
1	114438951	A	G	rs1217401	AP4B1	single nucleotide variant	NM_006594.4(AP4B1):c.1439T>C (p.Leu480Ser)	Neurodevelopmental;not specified	Mandenka(HuOrigin)	0.313465	0.627712	Benign	G	0.301653	0.311643	0.320894	0.319209	0.720273	0.170531	0.409587	0.0602245	0.0739661	0.171053	0.0554631	0.269632	0.314737	0.313109	0.312007	0.321226	0.315129	0.703687	0.22695	0.427083	0.0462131	0.2654	0.319037	0.3125	0.760417	0.745902	0.255814	0.0430108	0.308081	0.092233	0.0666667	0.335106	0.823232	0.20202	0.307692	0.296117
16	28898793	T	C	rs6565259	ATP2A1	single nucleotide variant	NM_173201.3(ATP2A1):c.678T>C (p.Thr226=)	Brody myopathy;not specified	Karitiana(HGDP)	0.336656	0.627629	Benign	C	0.359504	0.365291	0.286994	0.356288	0.521902	0.492657	0.24474	0.133751	0.172023	0.171053	0.123284	0.4026	0.356545	0.334209	0.375756	0.209368	0.341591	0.501736	0.450472	0.231034	0.141192	0.398847	0.37234	0.363051	0.567708	0.557377	0.168605	0.16129	0.353535	0.203883	0.147619	0.457447	0.489899	0.363636	0.32967	0.247573
1	207269919	C	T	rs8942	C4BPB	single nucleotide variant	NM_001017365.2(C4BPB):c.462C>T (p.Asn154=)	not specified	MSL(1KG_phase3)	0.319677	0.627382	Benign	T	0.191667	0.16566	0.233712	0.184115	0.795044	0.21468	0.276083	0.161673	0.16446	0.177632	0.160771	0.113683	0.178588	0.234809	0.162694	0.256104	0.221271	0.789758	0.222222	0.27931	0.168164	0.1178	0.163788	0.192804	0.838542	0.729508	0.197674	0.139785	0.176768	0.160194	0.157143	0.25	0.944444	0.111111	0.148352	0.247573
5	90001368	T	G	rs6880570	ADGRV1	single nucleotide variant	NM_032119.4(ADGRV1):c.8538T>G (p.Leu2846=)	not specified	Papuan(HGDP)	0.226288	0.626653	Benign	G	0.128099	0.120067	0.146759	0.131847	0.338801	0.14347	0.215095	0.408792	0.339454	0.30597	0.428622	0.170768	0.126252	0.153529	0.117801	0.200811	0.162467	0.345561	0.143868	0.210345	0.414948	0.171758	0.123718	0.146409	0.338542	0.360656	0.226744	0.553763	0.10101	0.364078	0.442857	0.175532	0.449495	0.151515	0.126374	0.174757
1	171083174	C	T	rs909530	FMO3	single nucleotide variant	NM_006894.5(FMO3):c.855C>T (p.Asn285=)	Trimethylaminuria;not specified	Nama(HuOrigin);Taa_West(HuOrigin)	0.310995	0.626505	Benign	T	0.252066	0.247775	0.178647	0.242577	0.440121	0.387945	0.187412	0.366273	0.374868	0.348684	0.364193	0.28222	0.245614	0.198496	0.279808	0.23524	0.24636	0.439227	0.36052	0.213793	0.379022	0.296083	0.25769	0.299263	0.432292	0.352459	0.302326	0.268817	0.277778	0.334951	0.414286	0.31383	0.474747	0.267677	0.269231	0.179612
2	84852011	C	T	rs11676670	DNAH6	single nucleotide variant	NM_001370.1(DNAH6):c.4354-15C>T	not specified	Taa_West(HuOrigin)	0.154763	0.626487	Benign	T	0.0518868	0.080293	0.0852619	0.0777102	0.447107	0.0724265	0.0688533	0.0107013	0.01606	0	0.00961538	0.0478736	0.0790109	0.0736776	0.0693674	0.113595	0.0888012	0.449069	0.0790094	0.0655172	0.00898588	0.0454807	0.0712247	0.0965074	0.447917	0.401639	0.0988372	0.016129	0.0555556	0.00970874	0.00952381	0.106383	0.464646	0.030303	0.0879121	0.0728155
5	121799505	T	C	rs11326	SNCAIP	single nucleotide variant	NM_005460.3(SNCAIP):c.*314T>C	Parkinson Disease, Dominant/Recessive	Papuan(HGDP)	0.108812	0.626482	Likely_benign	C	NA	NA	NA	NA	NA	NA	NA	NA	NA	NA	NA	NA	NA	NA	NA	NA	NA	0.0429885	0.148936	0.1	0.127564	0.162442	0.143441	0.136029	0.0208333	0.106557	0.122093	0.150538	0.126263	0.116505	0.119048	0.0851064	0.020202	0.161616	0.17033	0.126214
11	108018716	A	C	rs2280332	ACAT1	single nucleotide variant	NM_000019.3(ACAT1):c.*599A>C	Deficiency of acetyl-CoA acetyltransferase	Papuan(HuOrigin)	0.338201	0.626085	Benign	C	NA	NA	NA	NA	NA	NA	NA	NA	NA	NA	NA	NA	NA	NA	NA	NA	NA	0.449538	0.188679	0.196552	0.625	0.214862	0.205764	0.26107	0.447917	0.434426	0.418605	0.741935	0.232323	0.582524	0.633333	0.159574	0.520202	0.267677	0.197802	0.339806
2	47709704	T	C	rs2042649	MSH2	single nucleotide variant	NM_000251.2(MSH2):c.2635-214T>C	Lynch syndrome	BTQ(AAGC)	0.166049	0.625618	Benign	C	NA	NA	NA	NA	NA	NA	NA	NA	NA	NA	NA	NA	NA	NA	NA	NA	NA	0.0266422	0.168632	0.0758621	0.544459	0.114607	0.103218	0.122468	0.0104167	0.0409836	0.22093	0.698925	0.0858586	0.456311	0.461905	0.138298	0	0.0505051	0.0934066	0.121359
11	44283238	G	A	rs7116335	ALX4	single nucleotide variant	NM_021926.4(ALX4):c.*3166C>T	Enlarged parietal foramina	Karitiana(HGDP)	0.303223	0.625349	Benign	A	NA	NA	NA	NA	NA	NA	NA	NA	NA	NA	NA	NA	NA	NA	NA	NA	NA	0.0867816	0.492908	0.182759	0.405405	0.298044	0.263001	0.274492	0.0885417	0.106557	0.395349	0.483871	0.292929	0.402913	0.395238	0.382979	0.040404	0.29798	0.269231	0.38835
16	55519607	C	T	rs1053605	MMP2	single nucleotide variant	NM_004530.5(MMP2):c.750C>T (p.Thr250=)	Multicentric Osteolysis-Nodulosis-Arthropathy (MONA) Spectrum Disorders	Papuan(HuOrigin)	0.089051	0.625235	Likely_benign	T	0.0661157	0.0691346	0.0662378	0.0680366	0.0470595	0.032439	0.0614087	0.151299	0.11341	0.111842	0.161744	0.0520747	0.067875	0.064093	0.0667713	0.120982	0.0663082	0.0436636	0.0318396	0.0517241	0.131748	0.0471807	0.0695455	0.0615809	0.046875	0.0327869	0.174419	0.204301	0.0858586	0.145631	0.161905	0.0425532	0.040404	0.0555556	0.0714286	0.145631
14	90509564	C	T	rs9488	TDP1	single nucleotide variant	NM_018319.3(TDP1):c.*77C>T	Autosomal recessive cerebellar ataxia	BantuKenya(HGDP)	0.147833	0.624895	Benign	T	NA	NA	NA	NA	NA	NA	NA	NA	NA	NA	NA	NA	NA	NA	NA	NA	NA	0.541167	0.0695755	0.124138	0.0282051	0.0426267	0.0413046	0.0716912	0.604167	0.47541	0.0988372	0.0268817	0.0454545	0.0485437	0.0285714	0.12766	0.742424	0.020202	0.021978	0.135922
7	100782460	G	A	rs1050955	SERPINE1	single nucleotide variant	NM_000602.4(SERPINE1):c.*1737G>A	Plasminogen activator inhibitor type 1 deficiency	Karitiana(HGDP)	0.339681	0.624604	Benign	A	NA	NA	NA	NA	NA	NA	NA	NA	NA	NA	NA	NA	NA	NA	NA	NA	NA	0.233878	0.412048	0.25	0.447809	0.165571	0.21742	0.239332	0.28125	0.188525	0.348837	0.526882	0.212121	0.456311	0.47619	0.398936	0.247475	0.181818	0.21978	0.354369
5	176637149	G	A	rs3733874	NSD1	single nucleotide variant	NM_022455.4(NSD1):c.1749G>A (p.Glu583=)	Neurodevelopmental;Sotos Syndrome;Weaver syndrome;not specified	Nganasans(HuOrigin)	0.239244	0.624393	Benign	A	0.2375	0.114689	0.100908	0.119144	0.0801101	0.234009	0.111792	0.516041	0.496854	0.371622	0.522651	0.184154	0.118707	0.125379	0.13069	0.214579	0.152066	0.0797885	0.205189	0.103448	0.519506	0.197353	0.14219	0.171271	NA	NA	NA	NA	NA	NA	NA	NA	NA	NA	NA	NA
4	102751076	G	A	rs10516487	BANK1	single nucleotide variant	NM_017935.4(BANK1):c.182G>A (p.Arg61His)	Systemic lupus erythmatosus, association with	Hadza(HuOrigin)	0.240145	0.623491	Uncertain_significance	A	0.279167	0.31231	0.294968	0.301067	0.238342	0.17471	0.350457	0.166775	0.106862	0.105263	0.183287	0.320976	0.297108	0.30997	0.267705	0.188359	0.273054	0.23913	0.193853	0.317241	0.164744	0.325723	0.294962	0.276753	0.171875	0.172131	0.156977	0.274194	0.267677	0.160194	0.195238	0.218085	0.20202	0.292929	0.346154	0.218447
2	179443540	A	G	rs10497517	TTN	single nucleotide variant	NM_133378.4(TTN):c.60513T>C (p.His20171=)	Cardiovascular phenotype;Dilated Cardiomyopathy, Dominant;Distal myopathy Markesbery-Griggs type;Hereditary myopathy with early respiratory failure;Hypertrophic cardiomyopathy;Limb-Girdle Muscular Dystrophy, Recessive;Myopathy, early-onset, with fatal cardiomyopathy;not specified	MbutiPygmy(HGDP)	0.108013	0.622756	Likely_benign	G	0.0495868	0.0349067	0.034894	0.0353808	0.197162	0.209206	0.0354425	0.0276221	0.00430571	0	0.0340763	0.0579129	0.0353851	0.0353649	0.036242	0.183288	0.0703073	0.194068	0.180851	0.0310345	0.0286086	0.0532221	0.0317038	0.0589319	0.255208	0.188525	0.209302	0.0537634	0.040404	0.0145631	0.0142857	0.164894	0.227273	0.0808081	0.0494505	0.199029
5	89988504	A	G	rs2366926	ADGRV1	single nucleotide variant	NM_032119.3(ADGRV1):c.7034A>G (p.Asn2345Ser)	not specified	Karitiana(HGDP)	0.342013	0.622273	Benign	G	0.318182	0.342295	0.321603	0.323829	0.207169	0.58028	0.266379	0.369006	0.463978	0.522727	0.341748	0.334821	0.332655	0.292296	0.336443	0.321332	0.359898	0.209726	0.519002	0.3	0.35843	0.322581	0.32322	0.355166	0.208333	0.311475	0.296512	0.268817	0.338384	0.42233	0.395238	0.441489	0.136364	0.29798	0.346154	0.305825
8	55541450	G	A	rs446227	RP1	single nucleotide variant	NM_006269.1(RP1):c.5008G>A (p.Ala1670Thr)	Retinitis Pigmentosa, Dominant;not provided;not specified	Papuan(HuOrigin)	0.27188	0.620977	Likely_benign	A	0.258333	0.258846	0.278813	0.261628	0.0953028	0.313924	0.227372	0.441164	0.402829	0.421053	0.451526	0.199298	0.257877	0.26779	0.241656	0.234257	0.258012	0.0940299	0.320755	0.217241	0.447607	0.20023	0.255556	0.235727	0.0520833	0.0983607	0.273256	0.462366	0.242424	0.417476	0.457143	0.260638	0.0505051	0.212121	0.263736	0.247573
6	32797168	G	A	rs241442	TAP2	single nucleotide variant	NM_000544.3(TAP2):c.1932+9C>T	not specified	Karitiana(HuOrigin)	0.296032	0.620635	Benign	A	0.333333	0.250805	0.268835	0.268849	0.169124	0.283113	0.344719	0.351061	0.378788	0.318841	0.343489	0.34073	0.251657	0.278807	0.215754	0.389105	0.286221	0.179089	0.280142	0.382759	0.347097	0.334778	0.267822	0.304428	0.171875	0.172131	0.465116	0.301075	0.267677	0.383495	0.366667	0.265957	0.176768	0.338384	0.247253	0.456311
21	35884525	G	A	rs11702354	KCNE1	single nucleotide variant	NM_000219.5(KCNE1):c.-577C>T	Jervell and Lange-Nielsen syndrome;Long QT syndrome;Romano-Ward syndrome	Karitiana(HuOrigin)	0.296469	0.620198	Benign	A	NA	NA	NA	NA	NA	NA	NA	NA	NA	NA	NA	NA	NA	NA	NA	NA	NA	0.122557	0.408019	0.227586	0.504516	0.227273	0.25276	0.238007	0.109375	0.114754	0.22093	0.548387	0.247475	0.57767	0.504762	0.297872	0.0808081	0.237374	0.296703	0.101942
22	19882984	T	G	rs5992495	TXNRD2	single nucleotide variant	NM_006440.4(TXNRD2):c.895A>C (p.Ser299Arg)	Cardiovascular phenotype;not specified	Yoruba(HGDP)	0.190343	0.61918	Benign	G	0.140496	0.165249	0.184659	0.171838	0.521337	0.138425	0.186431	0.0632651	0.0605029	0.0522388	0.0641227	0.11934	0.166327	0.182296	0.152181	0.204027	0.185662	0.516594	0.12766	0.190972	0.0584082	0.131549	0.158793	0.189114	0.578125	0.434426	0.186047	0.0430108	0.207071	0.0728155	0.0380952	0.234043	0.621212	0.191919	0.153846	0.237864
19	3586543	G	A	rs8113232	GIPC3	single nucleotide variant	NM_133261.2(GIPC3):c.276G>A (p.Leu92=)	not specified	BantuKenya(HGDP)	0.153566	0.619161	Benign	A	0.075	0.13105	0.113466	0.124155	0.532453	0.0816321	0.113754	0.0485643	0.0508119	0.0657895	0.0477875	0.0874132	0.125922	0.107062	0.127598	0.125882	0.123449	0.515798	0.0947867	0.110345	0.0476804	0.0852535	0.117223	0.158379	0.557292	0.516393	0.116279	0.0376344	0.151515	0.0339806	0.0333333	0.138298	0.575758	0.126263	0.17033	0.208738
7	73470714	G	A	rs2071307	ELN	single nucleotide variant	NM_000501.3(ELN):c.1264G>A (p.Gly422Ser)	Cutis laxa, autosomal dominant;Supravalvar aortic stenosis;not specified	Papuan(HuOrigin)	0.27394	0.618917	Benign	A	0.371901	0.404013	0.412031	0.408325	0.163775	0.218259	0.459028	0.11058	0.145888	0.164474	0.100666	0.353816	0.409839	0.395802	0.421864	0.241327	0.371824	0.165938	0.241135	0.431034	0.114046	0.361303	0.392419	0.356354	0.130208	0.188525	0.197674	0.0483871	0.378788	0.126214	0.114286	0.255319	0.111111	0.313131	0.450549	0.208738
6	32818774	T	C	rs1057141	TAP1	single nucleotide variant	NM_000593.5(TAP1):c.1177A>G (p.Ile393Val)	PEPTIDE TRANSPORTER PSF1 POLYMORPHISM;not specified	Hadza(HuOrigin)	0.244759	0.618877	Benign	C	0.155	0.159199	0.163149	0.164734	0.261914	0.185673	0.200802	0.228606	0.165532	0.137681	0.246299	0.202625	0.170481	0.145372	0.200254	0.276121	0.193485	0.269808	0.168632	0.213793	0.234496	0.2	0.170155	0.208103	0.255208	0.286885	0.22093	0.295699	0.126263	0.208738	0.185714	0.12234	0.29798	0.19697	0.164835	0.223301
10	73558886	G	A	rs4747194	CDH23	single nucleotide variant	NM_022124.5(CDH23):c.7073G>A (p.Arg2358Gln)	Nonsyndromic Hearing Loss, Recessive;Retinitis pigmentosa-deafness syndrome;not specified	Pima(HGDP)	0.310744	0.617827	Likely_benign	A	0.22314	0.286022	0.226295	0.258583	0.267571	0.43107	0.221104	0.529896	0.506548	0.574627	0.535832	0.347199	0.270448	0.198872	0.28652	0.258864	0.286329	0.26939	0.409198	0.210345	0.532903	0.336406	0.262492	0.288214	0.276042	0.295082	0.372093	0.494624	0.277778	0.514563	0.485714	0.25	0.247475	0.333333	0.32967	0.325243
4	126336703	T	C	rs17009618	FAT4	single nucleotide variant	NM_024582.4(FAT4):c.6585T>C (p.Asn2195=)	not specified	Papuan(HGDP)	0.206095	0.617434	Benign	C	0.116667	0.121965	0.145645	0.132488	0.132767	0.321453	0.170804	0.241124	0.23812	0.184211	0.242512	0.128616	0.127456	0.142054	0.120962	0.270105	0.16917	0.13742	0.28487	0.151724	0.257419	0.132048	0.13121	0.160221	0.119792	0.163934	0.27907	0.231183	0.141414	0.213592	0.247619	0.260638	0.191919	0.156566	0.0879121	0.237864
2	73829372	C	T	rs1052162	ALMS1	single nucleotide variant	NM_015120.4(ALMS1):c.12178C>T (p.Leu4060=)	not specified	ESN(1KG_phase3)	0.26837	0.615468	Benign	T	0.256198	0.239049	0.225166	0.235296	0.72227	0.402198	0.150685	0.00566079	0.0118421	0.0263158	0.00381415	0.231747	0.235338	0.24925	0.232245	0.159067	0.235544	0.719292	0.372038	0.151724	0.0045045	0.237752	0.235275	0.25974	0.6875	0.729508	0.133721	0.00537634	0.252525	0.00485437	0.00952381	0.340426	0.883838	0.212121	0.203297	0.174757
22	43032870	G	T	rs2285141	CYB5R3	single nucleotide variant	NM_000398.6(CYB5R3):c.22-18C>A	not specified	Burmese(Estonian_Biocentre)	0.2186	0.614734	Benign	T	0.148305	0.0925573	0.0949647	0.104449	0.0908464	0.0829891	0.0783962	0.589357	0.568654	0.506757	0.595701	0.154161	0.102569	0.11013	0.119055	0.188202	0.130751	0.0934483	0.0801887	0.0965517	0.591969	0.15879	0.117441	0.131919	0.109375	0.0983607	0.337209	0.645161	0.0858586	0.587379	0.561905	0.0585106	0.111111	0.181818	0.0879121	0.223301
3	10140671	G	A	rs7626117	FANCD2	single nucleotide variant	NM_033084.4(FANCD2):c.*37G>A	Fanconi anemia	MSL(1KG_phase3)	0.297239	0.614526	Benign	A	0.206612	0.181089	0.175763	0.186836	0.764895	0.206975	0.171993	0.0894296	0.106132	0.0460526	0.0854624	0.147678	0.179493	0.16967	0.170607	0.232096	0.19696	0.746255	0.256501	0.186207	0.0920206	0.16091	0.183	0.22048	0.807292	0.770492	0.133721	0.0322581	0.171717	0.106796	0.0857143	0.218085	0.873737	0.111111	0.214286	0.203883
9	123220829	A	G	rs2501727	CDK5RAP2	single nucleotide variant	NM_018249.5(CDK5RAP2):c.2274T>C (p.Asp758=)	Primary Microcephaly, Recessive;Primary autosomal recessive microcephaly 3;not specified	Ju_hoan_North(HuOrigin)	0.226469	0.61444	Likely_benign	G	0.11157	0.0977338	0.107516	0.101124	0.364973	0.152779	0.0883287	0.318558	0.348819	0.381579	0.3099	0.109361	0.102352	0.105322	0.108602	0.137994	0.124511	0.351196	0.141844	0.1	0.300645	0.110887	0.0962112	0.118081	0.348958	0.221311	0.215116	0.247312	0.0707071	0.300971	0.314286	0.132979	0.373737	0.111111	0.126374	0.140777
3	38802251	A	G	rs7641844	SCN10A	single nucleotide variant	NM_006514.3(SCN10A):c.884-13T>C	not specified	BTQ(AAGC)	0.386387	0.613613	Benign	G	0.330508	0.270777	0.279782	0.279202	0.347584	0.290728	0.372328	0.686641	0.69164	0.705479	0.685129	0.267699	0.278489	0.290977	0.287632	0.352485	0.301082	0.343462	0.290094	0.355172	0.702964	0.259067	0.287181	0.290441	0.296875	0.352459	0.343023	0.693548	0.277778	0.723301	0.685714	0.223404	0.30303	0.207071	0.263736	0.432039
1	196946775	T	C	rs9427662	CFHR5	single nucleotide variant	NM_030787.3(CFHR5):c.-20T>C	Mesangiocapillary glomerulonephritis, type II	Mandenka(HGDP)	0.113696	0.613577	Benign	C	0.0867769	0.0937426	0.085928	0.0931043	0.4362	0.0588864	0.0927763	0.000217486	0	0	0.000277316	0.0697846	0.0939424	0.0719101	0.101102	0.100627	0.0952381	0.438435	0.0813679	0.0758621	0	0.0607719	0.0877967	0.0863971	0.463542	0.377049	0.0813953	0	0.0656566	0	0	0.12766	0.479798	0.0858586	0.0494505	0.135922
14	23861811	A	G	rs365990	MYH6	single nucleotide variant	NM_002471.3(MYH6):c.3302T>C (p.Val1101Ala)	Atrial septal defect;Cardiovascular phenotype;Dilated Cardiomyopathy, Dominant;Hypertrophic cardiomyopathy;not specified	Papuan(HGDP)	0.328486	0.612691	Likely_benign	G	0.31405	0.367207	0.400191	0.369934	0.626615	0.234432	0.454266	0.166576	0.14484	0.105263	0.172976	0.265135	0.363541	0.381648	0.332517	0.309584	0.358214	0.63169	0.286747	0.486111	0.159561	0.27768	0.366597	0.355535	0.635417	0.54918	0.226744	0.123656	0.292929	0.18932	0.171429	0.382979	0.707071	0.267677	0.395604	0.364078
5	89989779	G	A	rs16876822	ADGRV1	single nucleotide variant	NM_032119.3(ADGRV1):c.7206G>A (p.Glu2402=)	not provided;not specified	Karitiana(HuOrigin)	0.345703	0.61263	Benign	A	0.318182	0.343022	0.322124	0.324974	0.20874	0.581773	0.268145	0.368116	0.464628	0.514925	0.340598	0.336089	0.333907	0.292986	0.33922	0.322542	0.364035	0.210235	0.520095	0.3	0.358065	0.322767	0.323606	0.354512	0.208333	0.311475	0.296512	0.268817	0.338384	0.42233	0.395238	0.441489	0.136364	0.29798	0.346154	0.305825
14	94843083	G	A	rs877081	SERPINA1	single nucleotide variant	NM_001127701.1(SERPINA1):c.*1703C>T	Alpha-1-antitrypsin deficiency	Onge(HuOrigin)	0.16033	0.612397	Likely_benign	A	NA	NA	NA	NA	NA	NA	NA	NA	NA	NA	NA	NA	NA	NA	NA	NA	NA	0.0613814	0.123821	0.1	0.28599	0.111111	0.130237	0.131434	0.0885417	0.0655738	0.337209	0.38172	0.151515	0.315534	0.266667	0.0904255	0.0757576	0.10101	0.10989	0.330097
7	107561392	G	A	rs8440	DLD	single nucleotide variant	NM_000108.4(DLD):c.*1688G>A	Leigh syndrome;Maple syrup urine disease;Pyruvate dehydrogenase complex deficiency	BTQ(AAGC)	0.304428	0.612239	Likely_benign	A	NA	NA	NA	NA	NA	NA	NA	NA	NA	NA	NA	NA	NA	NA	NA	NA	NA	0.10949	0.351896	0.355172	0.320645	0.387737	0.423512	0.356747	0.135417	0.122951	0.337209	0.301075	0.424242	0.349515	0.319048	0.319149	0.0252525	0.363636	0.39011	0.320388
7	107560651	G	T	rs7777259	DLD	single nucleotide variant	NM_000108.4(DLD):c.*947G>T	Leigh syndrome;Maple syrup urine disease;Pyruvate dehydrogenase complex deficiency	BTQ(AAGC)	0.304569	0.612097	Likely_benign	T	NA	NA	NA	NA	NA	NA	NA	NA	NA	NA	NA	NA	NA	NA	NA	NA	NA	0.11037	0.3487	0.355172	0.322436	0.387896	0.423527	0.358856	0.135417	0.122951	0.331395	0.306452	0.429293	0.349515	0.32381	0.319149	0.030303	0.363636	0.384615	0.315534
17	38457151	G	A	rs13706	CDC6	single nucleotide variant	NM_001254.4(CDC6):c.1321G>A (p.Val441Ile)	Meier-Gorlin syndrome;not specified	Mandenka(HuOrigin)	0.211457	0.612072	Benign	A	0.0785124	0.104584	0.121412	0.114527	0.475698	0.139917	0.0980159	0.352561	0.430854	0.440789	0.330907	0.118025	0.109264	0.12397	0.104018	0.0987195	0.131485	0.468829	0.120283	0.148276	0.342139	0.11565	0.0961089	0.125	0.494792	0.385246	0.0930233	0.322581	0.111111	0.300971	0.395238	0.212766	0.545455	0.0858586	0.126374	0.092233
3	170732300	G	A	rs5400	SLC2A2	single nucleotide variant	NM_000340.1(SLC2A2):c.329C>T (p.Thr110Ile)	Fanconi-Bickel syndrome;not provided;not specified	MbutiPygmy(HGDP)	0.157261	0.61197	Benign	A	0.136364	0.129289	0.157235	0.137069	0.461184	0.117402	0.138023	0.00554649	0.00393288	0.0328947	0.00568497	0.131236	0.134426	0.157046	0.127229	0.155213	0.147327	0.457442	0.145047	0.117241	0.00320924	0.139401	0.132849	0.178309	0.46875	0.385246	0.19186	0.00537634	0.141414	0.0194175	0.00952381	0.223404	0.565657	0.116162	0.0934066	0.165049
5	89979750	G	T	rs16868972	ADGRV1	single nucleotide variant	NM_032119.4(ADGRV1):c.6012G>T (p.Leu2004Phe)	not specified	Onge(HuOrigin)	0.251713	0.611923	Benign	T	0.140496	0.129804	0.166281	0.145316	0.437046	0.159206	0.245262	0.409447	0.343008	0.30597	0.42853	0.176572	0.137981	0.168548	0.126994	0.222524	0.184097	0.438394	0.15684	0.248276	0.415375	0.17664	0.133744	0.162362	0.442708	0.418033	0.232558	0.55914	0.111111	0.359223	0.452381	0.212766	0.585859	0.151515	0.148352	0.203883
16	1841033	G	A	rs17559	IGFALS	single nucleotide variant	NM_004970.2(IGFALS):c.1386C>T (p.Tyr462=)	Acid-labile subunit deficiency	Papuan(HGDP)	0.182592	0.611526	Benign	A	0.122222	0.100525	0.0887808	0.0992634	0.445335	0.0668026	0.0887344	0.140924	0.142895	0.125	0.140489	0.0671893	0.0940231	0.0823587	0.0810539	0.320715	0.114954	0.455489	0.0825472	0.0931034	0.145349	0.0759494	0.104638	0.115809	0.463542	0.45082	0.302326	0.145161	0.116162	0.169903	0.152381	0.117021	0.530303	0.0555556	0.104396	0.276699
6	100836784	C	A	rs13201004	SIM1	single nucleotide variant	NM_005068.2(SIM1):c.*1453G>T	Schaaf-yang syndrome	Papuan(HuOrigin)	0.102999	0.611286	Likely_benign	A	NA	NA	NA	NA	NA	NA	NA	NA	NA	NA	NA	NA	NA	NA	NA	NA	NA	0.0948771	0.113208	0.124138	0.129344	0.0934983	0.134324	0.121771	0.09375	0.0901639	0.0755814	0.247312	0.0909091	0.135922	0.157143	0.106383	0.0808081	0.0909091	0.0934066	0.0873786
15	43016547	T	C	rs3742987	CDAN1	single nucleotide variant	NM_138477.2(CDAN1):c.*142A>G	Congenital dyserythropoietic anemia	YRI(1KG_phase3)	0.384188	0.611182	Benign	C	NA	NA	NA	NA	NA	NA	NA	NA	NA	NA	NA	NA	NA	NA	NA	NA	NA	0.839343	0.179245	0.326389	0.228149	0.257192	0.225519	0.304067	0.911458	0.844262	0.366279	0.284946	0.212121	0.262136	0.2	0.228723	0.984848	0.212121	0.21978	0.509709
2	215910724	T	G	rs11890512	ABCA12	single nucleotide variant	NM_173076.2(ABCA12):c.709A>C (p.Asn237His)	Congenital ichthyosiform erythroderma	Yoruba(HGDP)	0.079568	0.610908	Benign	G	0.0168067	0.0129496	0.011838	0.0147751	0.478562	0.0502466	0.00308703	0.000217746	0	0	0.000277469	0.00798811	0.0135061	0.0157539	0.0133768	0.0315566	0.0300493	0.470276	0.057783	0	0	0.00546605	0.0148528	0.0404412	0.552083	0.459016	0.0232558	0	0.0151515	0	0	0.0585106	0.59596	0.010101	0.010989	0.0291262
2	179600648	C	T	rs2742347	TTN	single nucleotide variant	NM_133378.4(TTN):c.10793G>A (p.Arg3598Lys)	Cardiovascular phenotype;Dilated Cardiomyopathy, Dominant;Distal myopathy Markesbery-Griggs type;Hereditary myopathy with early respiratory failure;Hypertrophic cardiomyopathy;Limb-Girdle Muscular Dystrophy, Recessive;Myopathy, early-onset, with fatal cardiomyopathy;not specified	MbutiPygmy(HGDP)	0.120107	0.610662	Likely_benign	T	0.0289256	0.0503893	0.0404812	0.0430872	0.215485	0.252174	0.0716985	0.208937	0.248813	0.171642	0.198517	0.0523531	0.0475485	0.0364388	0.0526641	0.0421541	0.0813183	0.220304	0.211584	0.0793103	0.186528	0.0584341	0.0466338	0.0656192	0.197917	0.204918	0.0523256	0.145161	0.0757576	0.218447	0.228571	0.117021	0.257576	0.0555556	0.043956	0.0145631
16	8875763	T	C	rs1731071	ABAT	single nucleotide variant	NM_020686.5(ABAT):c.*476T>C	Gamma-aminobutyric acid transaminase deficiency	BTQ(AAGC)	0.389416	0.610584	Benign	C	NA	NA	NA	NA	NA	NA	NA	NA	NA	NA	NA	NA	NA	NA	NA	NA	NA	0.441584	0.391253	0.313793	0.389105	0.317108	0.35148	0.326208	0.453125	0.47541	0.383721	0.33871	0.277778	0.330097	0.333333	0.37234	0.510101	0.282828	0.346154	0.305825
2	27592423	C	T	rs7602534	EIF2B4	single nucleotide variant	NM_001034116.1(EIF2B4):c.76-7G>A	Leukoencephalopathy with vanishing white matter;not provided;not specified	Pima(HGDP)	0.353863	0.610423	Benign	T	0.371901	0.381472	0.305459	0.36891	0.483141	0.552931	0.332738	0.147216	0.118052	0.0986842	0.155366	0.42793	0.378949	0.308614	0.426379	0.400281	0.387097	0.493209	0.546099	0.310345	0.152005	0.429476	0.385176	0.400369	0.552083	0.508197	0.395349	0.177419	0.409091	0.11165	0.17619	0.345745	0.5	0.459596	0.340659	0.485437
16	89986154	G	A	rs885479	MC1R	single nucleotide variant	NM_002386.3(MC1R):c.488G>A (p.Arg163Gln)	Malignant Melanoma Susceptibility;not specified	Buryats(Estonian_Biocentre);Koryaks(Estonian_Biocentre)	0.223215	0.610119	Benign	A	0.0603448	0.0460511	0.0233422	0.0426672	0.0166107	0.396537	0.0344	0.639636	0.754979	0.783333	0.606923	0.226988	0.0482227	0.0293675	0.0709582	0.0375229	0.111333	0.0186335	0.329009	0.0381944	0.624352	0.21145	0.055404	0.132353	0.015625	0.0491803	0.0755814	0.532258	0.0808081	0.640777	0.595238	0.207447	0	0.171717	0.0769231	0.0145631
12	1983782	C	T	rs758160	CACNA2D4	single nucleotide variant	NM_172364.4(CACNA2D4):c.1866G>A (p.Pro622=)	Cone dystrophy 3;not specified	Papuan(HuOrigin)	0.104238	0.610047	Likely_benign	T	0.152893	0.103352	0.0928007	0.102472	0.138196	0.0450383	0.107839	0.0329958	0.0683604	0.0671642	0.0230385	0.0831168	0.101495	0.119083	0.098857	0.133453	0.0965289	0.148148	0.0330189	0.12069	0.0192555	0.0696603	0.110953	0.0994475	0.109375	0.188525	0.110465	0.0215054	0.131313	0.0194175	0.0333333	0.0585106	0.151515	0.116162	0.0934066	0.150485
5	89979698	C	T	rs4916685	ADGRV1	single nucleotide variant	NM_032119.3(ADGRV1):c.5960C>T (p.Pro1987Leu)	not specified	Karitiana(HGDP)	0.35443	0.609856	Benign	T	0.326446	0.343921	0.325466	0.327595	0.252338	0.583967	0.270006	0.36918	0.465481	0.514925	0.341569	0.335836	0.33574	0.297736	0.340597	0.323246	0.36532	0.25046	0.521277	0.3	0.356868	0.322869	0.323827	0.356618	0.270833	0.327869	0.296512	0.268817	0.338384	0.42233	0.395238	0.441489	0.176768	0.29798	0.351648	0.305825
1	66067109	T	C	rs1805134	LEPR	single nucleotide variant	NM_002303.5(LEPR):c.1029T>C (p.Ser343=)	Leptin receptor deficiency;Monogenic Non-Syndromic Obesity;not provided	BTQ(AAGC)	0.223513	0.60982	Likely_benign	C	0.191667	0.197714	0.227154	0.208444	0.33872	0.123872	0.300338	0.0595846	0.0620744	0.111842	0.0583749	0.225504	0.211381	0.232384	0.227983	0.339641	0.226455	0.325667	0.145735	0.336806	0.0545571	0.237917	0.213654	0.230699	0.338542	0.303279	0.348837	0.0698925	0.217172	0.0485437	0.0428571	0.159574	0.39899	0.262626	0.17033	0.378641
15	43017426	T	G	rs16957091	CDAN1	single nucleotide variant	NM_138477.4(CDAN1):c.3474A>C (p.Leu1158=)	Congenital dyserythropoietic anemia;not specified	YRI(HapMap)	0.38846	0.609077	Benign	G	0.241667	0.22297	0.231472	0.22727	0.850418	0.145666	0.321032	0.26052	0.272656	0.217105	0.257765	0.248359	0.223651	0.256015	0.213558	0.435997	0.265472	0.839581	0.181604	0.327586	0.230968	0.25878	0.225897	0.307904	0.911458	0.844262	0.366279	0.27957	0.212121	0.26699	0.2	0.228723	0.984848	0.212121	0.214286	0.509709
2	179414318	C	T	rs747122	TTN	single nucleotide variant	NM_133378.4(TTN):c.84427G>A (p.Val28143Met)	Cardiovascular phenotype;Dilated Cardiomyopathy, Dominant;Distal myopathy Markesbery-Griggs type;Hereditary myopathy with early respiratory failure;Hypertrophic cardiomyopathy;Limb-Girdle Muscular Dystrophy, Recessive;Myopathy, early-onset, with fatal cardiomyopathy;not specified	MbutiPygmy(HGDP)	0.121775	0.608995	Likely_benign	T	0.0495868	0.0323734	0.0331272	0.0335109	0.25895	0.206647	0.0354221	0.0275117	0.00447368	0	0.0340131	0.0577496	0.0334338	0.0349887	0.0348155	0.182074	0.0685752	0.251034	0.180425	0.0310345	0.0288832	0.0535098	0.030197	0.0588235	0.302083	0.254098	0.203488	0.0483871	0.0353535	0.0145631	0.0142857	0.180851	0.318182	0.0808081	0.043956	0.194175
6	32796751	T	C	rs241447	TAP2	single nucleotide variant	NM_000544.3(TAP2):c.1993G= (p.Ala665=)	not specified	Karitiana(HGDP)	0.320021	0.60855	Benign	C	0.340909	0.253734	0.292808	0.277863	0.176106	0.354616	0.345343	0.359465	0.382118	0.265625	0.355097	0.341973	0.261575	0.259036	0.222145	0.394051	0.298317	0.179963	0.327381	0.386207	0.354756	0.334775	0.268835	0.305709	0.177083	0.180328	0.465116	0.301075	0.267677	0.38835	0.37619	0.303191	0.176768	0.338384	0.247253	0.456311
4	88929305	G	A	rs2728118	PKD2	single nucleotide variant	NM_000297.3(PKD2):c.420G>A (p.Gly140=)	Polycystic kidney disease, autosomal dominant;not provided;not specified	eas_jpn(gnomAD.exomes)	0.141647	0.608353	Likely_benign	A	0.0833333	0.111026	0.0755008	0.0961173	0.03125	0.27737	0.06538	0.289644	0.392683	0.75	0.275684	0.0762608	0.102168	0.0634921	0.0795602	0.063422	0.115132	0.0265549	0.187811	0.0827586	0.264175	0.0726002	0.103263	0.10452	0.0260417	0.0491803	0.0697674	0.172043	0.0858586	0.281553	0.2	0.228723	0.00505051	0.0959596	0.120879	0.0242718
6	32796685	A	G	rs241448	TAP2	single nucleotide variant	NM_000544.3(TAP2):c.2059C= (p.Gln687=)	not specified	Karitiana(HGDP)	0.3211	0.607471	Benign	G	0.346591	0.253847	0.294397	0.278907	0.210384	0.356343	0.343271	0.361455	0.384737	0.274194	0.357078	0.343468	0.262015	0.238693	0.222008	0.393973	0.299444	0.214385	0.329762	0.381944	0.354839	0.335063	0.269181	0.305915	0.203125	0.204918	0.465116	0.301075	0.267677	0.383495	0.37619	0.303191	0.232323	0.338384	0.247253	0.456311
16	8875858	A	C	rs1641031	ABAT	single nucleotide variant	NM_020686.5(ABAT):c.*571A>C	Gamma-aminobutyric acid transaminase deficiency	BTQ(AAGC)	0.392646	0.607354	Benign	C	NA	NA	NA	NA	NA	NA	NA	NA	NA	NA	NA	NA	NA	NA	NA	NA	NA	0.435675	0.41253	0.313793	0.37859	0.317003	0.348935	0.328067	0.453125	0.47541	0.383721	0.33871	0.277778	0.325243	0.333333	0.393617	0.510101	0.282828	0.346154	0.305825
8	101225559	C	G	rs2514681	SPAG1	single nucleotide variant	NM_172218.2(SPAG1):c.1338C>G (p.Ala446=)	not specified	eas_kor(gnomAD.exomes)	0.392754	0.607246	Benign	G	0.34	0.411661	0.403915	0.408517	0.213675	0.584118	0.397069	0.52765	1	NA	0.525463	0.375	0.412735	0.340426	0.494208	0.356275	0.439744	0.213477	0.489362	0.328358	0.505837	0.342936	0.344309	0.354043	0.182292	0.204918	0.331395	0.548387	0.343434	0.553398	0.457143	0.388298	0.161616	0.388889	0.401099	0.26699
14	35181786	T	C	rs9789	CFL2	single nucleotide variant	NM_021914.7(CFL2):c.*285A>G	Nemaline Myopathy, Recessive	Xuun(HuOrigin)	0.277622	0.606993	Benign	C	0.12	0.155058	0.200249	0.163041	0.572868	0.147955	0.210583	0.185533	0.167559	0.0454545	0.189767	0.125509	0.15868	0.184397	0.150814	0.256358	0.190005	0.560617	0.166274	0.231034	0.194337	0.127807	0.156952	0.175875	0.635417	0.565574	0.232558	0.268817	0.156566	0.165049	0.190476	0.143617	0.585859	0.131313	0.186813	0.34466
9	139323311	T	C	rs8413	INPP5E	single nucleotide variant	NM_019892.5(INPP5E):c.*816A>G	Joubert syndrome	Pima(HGDP)	0.357489	0.606797	Benign	C	NA	NA	NA	NA	NA	NA	NA	NA	NA	NA	NA	NA	NA	NA	NA	NA	NA	0.382841	0.514151	0.372414	0.185161	0.330455	0.414555	0.356089	0.395833	0.393443	0.354651	0.16129	0.494949	0.194175	0.219048	0.56383	0.439394	0.313131	0.450549	0.373786
2	179582327	C	T	rs13390491	TTN	single nucleotide variant	TTN:c.25274G>A (p.Ser8425Asn)	Cardiovascular phenotype;Dilated Cardiomyopathy, Dominant;Distal myopathy Markesbery-Griggs type;Hereditary myopathy with early respiratory failure;Hypertrophic cardiomyopathy;Limb-Girdle Muscular Dystrophy, Recessive;Myopathy, early-onset, with fatal cardiomyopathy;not specified	Papuan(HGDP)	0.216833	0.606697	Likely_benign	T	0.144628	0.155039	0.165951	0.151224	0.165153	0.173194	0.122231	0.429737	0.401128	0.432836	0.437356	0.0955156	0.149705	0.148232	0.132331	0.221704	0.16544	0.163567	0.1875	0.1	0.42153	0.0857801	0.149501	0.142726	0.171875	0.180328	0.25	0.505376	0.131313	0.393204	0.461905	0.180851	0.171717	0.0909091	0.208791	0.218447
17	73942150	A	G	rs3682	ACOX1	single nucleotide variant	NM_004035.6(ACOX1):c.*679T>C	Pseudoneonatal adrenoleukodystrophy	Hadza(HuOrigin);MbutiPygmy(HGDP)	0.393504	0.606496	Benign	G	NA	NA	NA	NA	NA	NA	NA	NA	NA	NA	NA	NA	NA	NA	NA	NA	NA	0.849139	0.307783	0.388889	0.195232	0.242512	0.323915	0.348708	0.817708	0.836066	0.27907	0.166667	0.348485	0.257282	0.195238	0.388298	0.914141	0.191919	0.357143	0.26699
8	144992103	T	C	rs6558406	PLEC	single nucleotide variant	NM_000445.4(PLEC):c.11967A>G (p.Thr3989=)	not specified	BiakaPygmy(HGDP);MbutiPygmy(HGDP);Yoruba(HGDP)	0.393505	0.606495	Benign	C	0.340336	0.455148	0.476174	0.444124	0.866688	0.291795	0.471724	0.154382	0.16396	0.141791	0.151888	0.426591	0.445892	0.463359	0.419043	0.38615	0.437748	0.854801	0.371158	0.455172	0.144974	0.419792	0.431433	0.442486	0.895833	0.836066	0.383721	0.16129	0.464646	0.165049	0.171429	0.446809	0.969697	0.39899	0.467033	0.364078
3	172835125	T	C	rs1515442	SPATA16	single nucleotide variant	NM_031955.5(SPATA16):c.397A>G (p.Met133Val)	Spermatogenic Failure	Taa_West(HuOrigin)	0.362531	0.606219	Benign	C	0.27686	0.266996	0.269104	0.278913	0.661376	0.280503	0.240024	0.381867	0.40766	0.375	0.375121	0.253188	0.272256	0.268567	0.274571	0.321018	0.285318	0.651973	0.316351	0.224138	0.397021	0.25374	0.270135	0.303309	0.723958	0.614754	0.383721	0.295699	0.277778	0.402913	0.404762	0.319149	0.782828	0.227273	0.241758	0.359223
17	18047189	G	A	rs2272571	MYO15A	single nucleotide variant	NM_016239.3(MYO15A):c.6052G>A (p.Gly2018Arg)	Nonsyndromic Hearing Loss, Recessive;not specified	Karitiana(HGDP);Pima(HGDP)	0.25096	0.606183	Likely_benign	A	0.146018	0.117483	0.0887564	0.109413	0.149895	0.356459	0.111014	0.507693	0.508746	0.403226	0.508523	0.171506	0.111776	0.101643	0.110377	0.157024	0.154563	0.142611	0.310142	0.124138	0.519305	0.183573	0.134161	0.173713	0.166667	0.188525	0.232558	0.505376	0.146465	0.514563	0.561905	0.244681	0.156566	0.166667	0.131868	0.126214
4	55130078	T	C	rs2229307	PDGFRA	single nucleotide variant	NM_006206.5(PDGFRA):c.612T>C (p.Asn204=)	Gastrointestinal stroma tumor;Idiopathic hypereosinophilic syndrome;not specified	Onge(HuOrigin)	0.212437	0.605745	Benign	C	0.0826446	0.129669	0.108396	0.117079	0.259583	0.41378	0.0712438	0.178715	0.140157	0.206667	0.188619	0.124618	0.121532	0.0938438	0.122681	0.223559	0.147627	0.258633	0.364387	0.0729167	0.18	0.119584	0.116349	0.154696	0.28125	0.237705	0.30814	0.204301	0.116162	0.223301	0.171429	0.170213	0.277778	0.10101	0.164835	0.23301
1	237796837	G	A	rs10802626	RYR2	single nucleotide variant	NM_001035.2(RYR2):c.6556-41G>A	not specified	Papuan(HuOrigin)	0.394315	0.605685	Benign	A	0.264463	0.342441	0.316344	0.335247	0.512857	0.390626	0.207726	0.464735	0.449659	0.328358	0.470147	0.364618	0.335548	0.314801	0.336036	0.339512	0.340093	0.50875	0.401891	0.173611	0.466624	0.368088	0.347464	0.338235	0.453125	0.516393	0.389535	0.537634	0.343434	0.529126	0.452381	0.425532	0.540404	0.323232	0.296703	0.402913
15	75183935	G	A	rs11638130	MPI	single nucleotide variant	NM_002435.2(MPI):c.345+15G>A	Congenital disorder of glycosylation;Congenital disorder of glycosylation type 1B;not specified	Icelandic(HuOrigin)	0.228356	0.604978	Benign	A	0.413223	0.549606	0.436422	0.507793	0.0859308	0.349326	0.395448	0.115782	0.132792	0.164474	0.110764	0.401996	0.519868	0.417541	0.534336	0.130546	0.423466	0.0935128	0.362028	0.437931	0.112468	0.390138	0.492973	0.380295	0.0729167	0.0819672	0.151163	0.0698925	0.606061	0.092233	0.133333	0.489362	0	0.409091	0.56044	0.092233
4	126372742	G	A	rs1567047	FAT4	single nucleotide variant	NM_024582.4(FAT4):c.10571G>A (p.Gly3524Asp)	not specified	Karitiana(HuOrigin)	0.270264	0.604736	Benign	A	0.318182	0.292583	0.305101	0.291976	0.0590769	0.246126	0.269621	0.419748	0.417715	0.394737	0.420549	0.242354	0.286362	0.301802	0.259587	0.292625	0.270486	0.0627154	0.275	0.260417	0.419355	0.25734	0.289631	0.237523	0.0416667	0.0655738	0.313953	0.354839	0.237374	0.412621	0.385714	0.297872	0.0151515	0.282828	0.307692	0.184466
9	139266496	C	T	rs4077515	CARD9	single nucleotide variant	NM_052813.4(CARD9):c.35G>A (p.Ser12Asn)	Familial Candidiasis, Recessive;not specified	Pima(HGDP)	0.359736	0.604549	Benign	T	0.446903	0.434854	0.365199	0.414689	0.283629	0.536054	0.357086	0.298167	0.290569	0.286667	0.300292	0.418056	0.425695	0.347464	0.458074	0.325841	0.412054	0.284628	0.501179	0.386207	0.282861	0.412104	0.432096	0.39779	0.270833	0.368852	0.401163	0.387097	0.494949	0.286408	0.314286	0.547872	0.227273	0.363636	0.417582	0.417476
19	13007458	C	T	rs11085825	GCDH	single nucleotide variant	NM_000159.3(GCDH):c.852+223C>T	Glutaric aciduria, type 1	Karitiana(HuOrigin)	0.312442	0.604225	Likely_pathogenic	T	NA	NA	NA	NA	NA	NA	NA	NA	NA	NA	NA	NA	NA	NA	NA	NA	NA	0.208085	0.42654	0.262069	0.14129	0.297344	0.360736	0.337316	0.213542	0.237705	0.203488	0.182796	0.318182	0.135922	0.0952381	0.37766	0.19697	0.358586	0.302198	0.286408
6	49398115	C	T	rs9381784	MMUT	single nucleotide variant	NM_000255.3(MMUT):c.*1326G>A	Methylmalonic acidemia	Karitiana(HGDP);Pima(HGDP)	0.395864	0.604136	Benign	T	NA	NA	NA	NA	NA	NA	NA	NA	NA	NA	NA	NA	NA	NA	NA	NA	NA	0.064312	0.568019	0.413194	0.532216	0.385147	0.35513	0.346507	0.0625	0.114754	0.360465	0.526882	0.328283	0.592233	0.561905	0.521277	0	0.363636	0.351648	0.330097
1	6508712	T	C	rs77656032	ESPN	single nucleotide variant	NM_031475.2(ESPN):c.1476T>C (p.Cys492=)	not specified	LWK(1KG_phase3)	0.163814	0.603863	Benign	C	0.106061	0.0616434	0.0774527	0.0625	0.561351	0.0605579	0.0658144	0.00917569	0.00897436	0	0.00925015	0.0388255	0.0621496	0.0554745	0.0565651	0.0686067	0.0805178	0.599746	0.0985748	0.0798611	0.0115533	0.043956	0.0659369	0.0878505	0.645833	0.590164	0.0755814	0.016129	0.0555556	0.0339806	0.00952381	0.117021	0.727273	0.040404	0.043956	0.126214
18	32444040	G	A	rs1617318	DTNA	single nucleotide variant	NM_001392.4(DTNA):c.*35005G>A	Left ventricular noncompaction cardiomyopathy;not specified	BiakaPygmy(HGDP)	0.277471	0.603481	Benign	A	0.370536	0.328451	0.339839	0.332224	0.512795	0.166758	0.322023	0.0479587	0.041757	0.0446429	0.0496876	0.363892	0.333723	0.348768	0.342033	0.275081	0.319479	0.508539	0.20283	0.324138	0.0418275	0.348302	0.35231	0.353591	0.505208	0.434426	0.244186	0.0322581	0.30303	0.0582524	0.052381	0.255319	0.545455	0.363636	0.340659	0.291262
5	33951693	C	G	rs16891982	SLC45A2	single nucleotide variant	NM_016180.4(SLC45A2):c.1122C= (p.Phe374=)	not specified	fin(gnomAD.genomes)	0.380384	0.602931	Benign	G	0.975207	0.969222	0.881284	0.948586	0.147797	0.381371	0.910101	0.0016857	0.00104767	0	0.0018724	0.98226	0.955166	0.866942	0.981593	0.0970144	0.736808	0.159709	0.425708	0.90625	0.00514139	0.983314	0.965305	0.808118	0.0885417	0.213115	0.0406977	0	0.979798	0.0145631	0.0047619	0.638298	0	0.959596	0.978022	0.0873786
11	118895686	C	T	rs8192696	SLC37A4	single nucleotide variant	NM_001164277.1(SLC37A4):c.1224G>A (p.Thr408=)	not specified	Khomani(HuOrigin)	0.261222	0.602414	Benign	T	0.225	0.223924	0.21073	0.20708	0.356487	0.149336	0.189998	0.0901036	0.0843437	0.126866	0.0913112	0.22549	0.210738	0.18595	0.196094	0.294464	0.219484	0.335824	0.175708	0.193103	0.0730769	0.234177	0.205631	0.234375	0.375	0.319672	0.27907	0.0645161	0.222222	0.0533981	0.0571429	0.265957	0.308081	0.277778	0.192308	0.325243
16	31193942	C	A	rs741810	FUS	single nucleotide variant	NM_004960.3(FUS):c.147C>A (p.Gly49=)	Amyotrophic Lateral Sclerosis, Dominant;Amyotrophic lateral sclerosis type 6;not specified	Karitiana(HGDP)	0.254988	0.602155	Benign	A	0.31405	0.316873	0.245132	0.299135	0.0633612	0.378086	0.19623	0.249429	0.193033	0.25	0.264351	0.376051	0.308092	0.2397	0.339175	0.511889	0.318833	0.0657713	0.332547	0.213793	0.249357	0.386939	0.32167	0.358456	0.0520833	0.0409836	0.604651	0.317204	0.29798	0.145631	0.27619	0.345745	0.0252525	0.388889	0.285714	0.558252
6	116446576	A	G	rs1064583	COL10A1	single nucleotide variant	NM_000493.3(COL10A1):c.80T>C (p.Met27Thr)	Metaphyseal chondrodysplasia;not specified	Xuun(HuOrigin)	0.397953	0.602047	Benign	G	0.384298	0.397659	0.377826	0.380438	0.724219	0.230998	0.434895	0.210993	0.26087	0.302632	0.196825	0.362187	0.3857	0.380524	0.376636	0.354109	0.38563	0.711853	0.264775	0.431034	0.184041	0.357719	0.37729	0.356354	0.786458	0.639344	0.418605	0.268817	0.40404	0.218447	0.242857	0.351064	0.782828	0.388889	0.417582	0.354369
16	4387261	A	C	rs3810817	GLIS2	single nucleotide variant	NM_032575.2(GLIS2):c.1311A>C (p.Ala437=)	Nephronophthisis;not specified	MSL(1KG_phase3)	0.209891	0.601873	Benign	C	0.102273	0.121093	0.139497	0.117149	0.606073	0.219444	0.151486	0.108106	0.0868448	0.0869565	0.112856	0.134964	0.119971	0.118984	0.109712	0.151269	0.151152	0.607374	0.211085	0.137931	0.092545	0.143022	0.118084	0.17739	0.661458	0.57377	0.139535	0.129032	0.131313	0.0679612	0.12381	0.239362	0.621212	0.141414	0.10989	0.179612
2	179558366	T	C	rs2042995	TTN	single nucleotide variant	NM_133378.4(TTN):c.27832A>G (p.Ile9278Val)	Cardiovascular phenotype;Dilated Cardiomyopathy, Dominant;Distal myopathy Markesbery-Griggs type;Hereditary myopathy with early respiratory failure;Hypertrophic cardiomyopathy;Limb-Girdle Muscular Dystrophy, Recessive;Myopathy, early-onset, with fatal cardiomyopathy;not specified	Papuan(HGDP)	0.398418	0.601582	Likely_benign	C	0.218487	0.225262	0.237329	0.226146	0.55808	0.429699	0.266626	0.573743	0.527632	0.545455	0.586782	0.251682	0.227028	0.229781	0.226261	0.479608	0.298684	0.550241	0.419431	0.224138	0.565469	0.24424	0.227621	0.285055	0.5625	0.54918	0.569767	0.672043	0.217172	0.504854	0.6	0.37234	0.666667	0.252525	0.258242	0.475728
4	123664445	C	T	rs2292493	BBS12	single nucleotide variant	NM_152618.2(BBS12):c.1398C>T (p.Gly466=)	Bardet-Biedl syndrome;not specified	BTQ(AAGC)	0.31514	0.601527	Benign	T	0.0991736	0.0815838	0.127021	0.0936552	0.139596	0.379316	0.150298	0.661953	0.614458	0.651316	0.674643	0.0802589	0.0892289	0.139264	0.0745007	0.344309	0.171554	0.143021	0.334906	0.127586	0.652706	0.078053	0.0892625	0.13628	0.151042	0.131148	0.395349	0.693548	0.0858586	0.582524	0.661905	0.260638	0.116162	0.0505051	0.0879121	0.305825
17	3566232	C	T	rs7093	CTNS	single nucleotide variant	NM_004937.2(CTNS):c.*2569C>T	Cystinosis;Nephropathic cystinosis	BTQ(AAGC)	0.398474	0.601526	Benign	T	NA	NA	NA	NA	NA	NA	NA	NA	NA	NA	NA	NA	NA	NA	NA	NA	NA	0.215353	0.421986	0.503448	0.527671	0.287975	0.390643	0.344383	0.140625	0.213115	0.436047	0.516129	0.378788	0.42233	0.514286	0.398936	0.222222	0.30303	0.412088	0.427184
18	28649042	T	C	rs1893963	DSC2	single nucleotide variant	NM_024422.4(DSC2):c.2326A>G (p.Ile776Val)	Arrhythmogenic right ventricular cardiomyopathy;Arrhythmogenic right ventricular cardiomyopathy, type 11;Cardiovascular phenotype;not specified	MbutiPygmy(HGDP)	0.129434	0.601335	Likely_benign	C	0.0619835	0.0862471	0.0646987	0.0833441	0.416051	0.176154	0.100437	0.0999782	0.0884979	0.0986842	0.103023	0.0577936	0.0834582	0.0607196	0.0898752	0.0669911	0.090835	0.399609	0.160377	0.110345	0.10116	0.0578251	0.0800571	0.103704	0.432292	0.442623	0.0697674	0.0645161	0.121212	0.11165	0.0714286	0.175532	0.454545	0.10101	0.131868	0.0582524
1	185958737	A	G	rs7539719	HMCN1	single nucleotide variant	NM_031935.2(HMCN1):c.3166A>G (p.Thr1056Ala)	Macular degeneration	LWK(1KG_phase3)	0.121104	0.601118	Likely_benign	G	0.00826446	0.019814	0.0267142	0.0188307	0.504123	0.0329883	0.0158856	0.00610221	0.00502912	0.00657895	0.00637826	0.0134448	0.0195896	0.0202247	0.0170328	0.0437083	0.0362035	0.504964	0.0510689	0.0137931	0.00706941	0.0141048	0.0159761	0.0444444	0.578125	0.442623	0.0697674	0.0107527	0.010101	0.00970874	0.0047619	0.0638298	0.656566	0.020202	0.00549451	0.0242718
1	66036441	A	G	rs1137100	LEPR	single nucleotide variant	NM_002303.5(LEPR):c.326A>G (p.Lys109Arg)	LEPTIN RECEPTOR POLYMORPHISM;Leptin receptor deficiency;Monogenic Non-Syndromic Obesity;not specified	Han(HGDP)	0.325697	0.600774	Benign	G	0.361607	0.26729	0.197376	0.258274	0.163173	0.306729	0.164336	0.823717	0.810435	0.753425	0.828103	0.369332	0.259245	0.216331	0.278186	0.157055	0.263291	0.168006	0.29669	0.103448	0.825806	0.354755	0.283089	0.291513	0.1875	0.196721	0.168605	0.822581	0.30303	0.805825	0.842857	0.287234	0.141414	0.40404	0.247253	0.165049
6	35425416	A	G	rs13214239	FANCE	single nucleotide variant	NM_021922.2(FANCE):c.900+39A>G	not specified	Karitiana(HuOrigin)	0.399235	0.600765	Benign	G	0.579167	0.557695	0.501697	0.547549	0.129062	0.632118	0.349262	0.356931	0.408399	0.346667	0.343303	0.600761	0.554733	0.541332	0.582811	0.42971	0.498017	0.135089	0.594563	0.375862	0.337646	0.610855	0.579214	0.551565	0.0885417	0.155738	0.424419	0.268817	0.580808	0.398058	0.366667	0.590426	0.020202	0.606061	0.593407	0.461165
2	26676395	G	T	rs12623642	DRC1	single nucleotide variant	NM_145038.4(DRC1):c.1897G>T (p.Val633Phe)	not specified	Pima(HGDP)	0.185013	0.600701	Benign	T	0.0702479	0.067871	0.0553315	0.0628264	0.0329718	0.355037	0.085737	0.58676	0.613994	0.6	0.57939	0.0515535	0.0634439	0.0634384	0.0608512	0.0954498	0.101737	0.0323691	0.293632	0.0931034	0.605943	0.0512083	0.0705943	0.0782689	0.03125	0.0327869	0.0988372	0.489247	0.0909091	0.65534	0.652381	0.207447	0.010101	0.0656566	0.0879121	0.116505
5	89985882	A	G	rs10037067	ADGRV1	single nucleotide variant	NM_032119.4(ADGRV1):c.6695A>G (p.Tyr2232Cys)	not specified	Karitiana(HGDP)	0.364203	0.600083	Benign	G	0.327273	0.345104	0.327249	0.323069	0.290832	0.574189	0.269698	0.365261	0.455298	0.491071	0.337336	0.333022	0.334913	0.301456	0.332814	0.321297	0.359984	0.285895	0.524823	0.3	0.357786	0.322497	0.323388	0.358195	0.3125	0.385246	0.296512	0.268817	0.338384	0.42233	0.395238	0.441489	0.217172	0.29798	0.351648	0.305825
16	2125937	C	G	rs1800715	TSC2	single nucleotide variant	NM_000548.4(TSC2):c.2639+44C>G	Tuberous sclerosis syndrome;not specified	GWD(1KG_phase3)	0.139294	0.599644	Benign	G	0.0913043	0.0815664	0.0824099	0.0819905	0.554096	0.0694959	0.101041	0.000326797	0	0	0.000416551	0.110089	0.084588	0.0694864	0.0949245	0.063628	0.0950345	0.553025	0.0793839	0.113793	0.000642674	0.113191	0.0762294	0.101103	0.536458	0.491803	0.0465116	0	0.0959596	0	0	0.0957447	0.60101	0.136364	0.0659341	0.0776699
17	11532835	A	G	rs9895535	DNAH9	single nucleotide variant	NM_001372.3(DNAH9):c.1452A>G (p.Glu484=)	not specified	Taa_West(HuOrigin)	0.369356	0.599394	Benign	G	0.270833	0.298222	0.309424	0.298218	0.731754	0.219648	0.255209	0.145172	0.131744	0.0986842	0.149216	0.367046	0.300281	0.265367	0.305864	0.316287	0.309058	0.715846	0.22695	0.272414	0.142119	0.357637	0.293283	0.337017	0.791667	0.639344	0.319767	0.123656	0.287879	0.11165	0.161905	0.276596	0.813131	0.308081	0.351648	0.271845
14	76045362	T	C	rs2287015	FLVCR2	single nucleotide variant	NM_017791.2(FLVCR2):c.47T>C (p.Val16Ala)	Proliferative vasculopathy and hydranencephaly-hydrocephaly syndrome;not specified	Damara(HuOrigin)	0.400678	0.599322	Benign	C	0.235537	0.219434	0.240261	0.223733	0.676434	0.369037	0.277183	0.573029	0.579885	0.593333	0.571003	0.234821	0.220373	0.240255	0.206981	0.394173	0.279987	0.671835	0.34434	0.288194	0.565977	0.238754	0.226888	0.263352	0.671875	0.606557	0.430233	0.55914	0.212121	0.587379	0.566667	0.37766	0.782828	0.217172	0.181319	0.26699
20	57253275	C	T	rs11578	STX16	single nucleotide variant	NM_001001433.2(STX16):c.*1928C>T	Pseudohypoaldosteronism type 1 autosomal dominant	Papuan(HGDP)	0.224544	0.598985	Benign	T	NA	NA	NA	NA	NA	NA	NA	NA	NA	NA	NA	NA	NA	NA	NA	NA	NA	0.173099	0.163915	0.256944	0.242931	0.296488	0.278009	0.272059	0.223958	0.237705	0.180233	0.177419	0.328283	0.262136	0.238095	0.202128	0.136364	0.338384	0.291209	0.174757
5	127594414	A	T	rs13305	FBN2	single nucleotide variant	NM_001999.3(FBN2):c.*733T>A	Congenital contractural arachnodactyly	YRI(1KG_phase3)	0.188572	0.598465	Benign	T	NA	NA	NA	NA	NA	NA	NA	NA	NA	NA	NA	NA	NA	NA	NA	NA	NA	0.638633	0.110849	0.0793103	0.0321337	0.136364	0.127595	0.151934	0.697917	0.565574	0.0581395	0.0645161	0.126263	0.0533981	0.0190476	0.148936	0.767677	0.126263	0.126374	0.165049
1	207646322	G	A	rs1048971	CR2	single nucleotide variant	NM_001006658.2(CR2):c.1776G>A (p.Leu592=)	Systemic lupus erythematosus 9;not specified	Nama(HuOrigin)	0.37052	0.59823	Benign	A	0.338843	0.36515	0.347401	0.347056	0.704062	0.228841	0.300576	0.209476	0.252099	0.217105	0.198128	0.311703	0.358036	0.315592	0.368754	0.287235	0.340946	0.691546	0.24763	0.302083	0.196382	0.302821	0.345624	0.303867	0.682292	0.713115	0.174419	0.145161	0.323232	0.213592	0.161905	0.324468	0.767677	0.287879	0.412088	0.291262
21	35883489	C	T	rs2834502	KCNE1	single nucleotide variant	NM_000219.5(KCNE1):c.-252G>A	Jervell and Lange-Nielsen syndrome;Long QT syndrome;Romano-Ward syndrome	Karitiana(HGDP)	0.29529	0.597567	Benign	T	NA	NA	NA	NA	NA	NA	NA	NA	NA	NA	NA	NA	NA	NA	NA	NA	NA	0.0530669	0.402123	0.196552	0.515484	0.237766	0.242399	0.244465	0.0416667	0.0819672	0.22093	0.596774	0.222222	0.582524	0.566667	0.292553	0	0.247475	0.28022	0.106796
6	7580958	A	G	rs2076299	DSP	single nucleotide variant	NM_004415.3(DSP):c.4535A>G (p.Tyr1512Cys)	Arrhythmogenic right ventricular cardiomyopathy;Cardiovascular phenotype;Ectodermal dysplasia skin fragility syndrome;Epidermolysis bullosa, lethal acantholytic;Skin fragility woolly hair syndrome;not specified	Onge(HuOrigin)	0.175402	0.597325	Benign	G	0.0458333	0.0382101	0.0416448	0.0410238	0.294778	0.226038	0.0842337	0.291208	0.287585	0.280822	0.292275	0.063459	0.0416312	0.0447032	0.0474349	0.139221	0.0841795	0.286305	0.196934	0.062069	0.290968	0.0647296	0.0385562	0.0790441	0.322917	0.237705	0.226744	0.274194	0.0353535	0.305825	0.295238	0.207447	0.338384	0.0454545	0.0549451	0.126214
6	5260936	A	C	rs2224391	LYRM4	single nucleotide variant	NM_020408.5(LYRM4):c.31T>G (p.Ser11Ala)	not provided;not specified	MbutiPygmy(HGDP)	0.326373	0.596703	Benign	C	0.274038	0.253944	0.272234	0.258429	0.782365	0.36052	0.256194	0.264876	0.255539	0.186047	0.26809	0.212164	0.253438	0.265217	0.215856	0.172581	0.285151	0.779898	0.35967	0.244828	0.254204	0.218045	0.24827	0.281885	0.786458	0.713115	0.180233	0.27957	0.232323	0.305825	0.22381	0.356383	0.868687	0.237374	0.247253	0.145631
11	31809070	C	T	rs662702	PAX6	single nucleotide variant	NM_000280.4(PAX6):c.*2412G>A	Aniridia, Cerebellar Ataxia, And Intellectual Disability;Anophthalmia;Congenital aniridia;Foveal hypoplasia and presenile cataract syndrome;Irido-corneo-trabecular dysgenesis;Keratitis, hereditary;Wilms tumor, aniridia, genitourinary anomalies, and mental retardation syndrome	PI-MW(PASNP)	0.166625	0.596533	Benign	T	NA	NA	NA	NA	NA	NA	NA	NA	NA	NA	NA	NA	NA	NA	NA	NA	NA	0.306533	0.211584	0.110345	0.213368	0.0837169	0.0573058	0.0782689	0.328125	0.213115	0.0988372	0.182796	0.0757576	0.179612	0.204762	0.132979	0.29798	0.0757576	0.032967	0.0436893
18	3164385	C	T	rs11659820	MYOM1	single nucleotide variant	NM_003803.3(MYOM1):c.1392G>A (p.Arg464=)	Cardiovascular phenotype;not specified	Taa_West(HuOrigin)	0.184845	0.596405	Benign	T	0.169421	0.214409	0.212144	0.212032	0.26388	0.153713	0.191436	0.00534091	0.00844773	0.00746269	0.00445972	0.147805	0.21	0.212443	0.199249	0.173237	0.193074	0.269514	0.164303	0.168966	0.000641026	0.137752	0.189657	0.186691	0.223958	0.278689	0.116279	0	0.272727	0.0339806	0.0047619	0.154255	0.257576	0.191919	0.236264	0.150485
10	96058298	C	T	rs3765524	PLCE1	single nucleotide variant	NM_016341.3(PLCE1):c.5330C>T (p.Thr1777Ile)	Nephrotic syndrome;Nephrotic syndrome, type 3;not specified	Taa_West(HuOrigin)	0.309996	0.596254	Benign	T	0.367769	0.272235	0.347982	0.298043	0.420736	0.164118	0.423192	0.227339	0.247632	0.208955	0.222016	0.203386	0.281078	0.357839	0.237435	0.261961	0.300726	0.413419	0.183215	0.416667	0.218147	0.198962	0.295167	0.275322	0.4375	0.418033	0.232558	0.27957	0.272727	0.18932	0.214286	0.25	0.444444	0.217172	0.313187	0.228155
9	129459662	G	T	rs28687510	LMX1B	single nucleotide variant	NM_002316.3(LMX1B):c.*932G>T	Nail-patella syndrome	Taa_West(HuOrigin)	0.216281	0.596219	Benign	T	NA	NA	NA	NA	NA	NA	NA	NA	NA	NA	NA	NA	NA	NA	NA	NA	NA	0.302334	0.20283	0.0586207	0.367742	0.143843	0.108048	0.124309	0.302083	0.278689	0.127907	0.387097	0.126263	0.31068	0.395238	0.164894	0.323232	0.106061	0.159341	0.0582524
15	43016475	A	G	rs3742988	CDAN1	single nucleotide variant	NM_138477.2(CDAN1):c.*214T>C	Congenital dyserythropoietic anemia	YRI(1KG_phase3)	0.399169	0.596202	Benign	G	NA	NA	NA	NA	NA	NA	NA	NA	NA	NA	NA	NA	NA	NA	NA	NA	NA	0.835824	0.164692	0.302083	0.228387	0.240069	0.203829	0.290976	0.911458	0.844262	0.354651	0.284946	0.19697	0.262136	0.2	0.218085	0.984848	0.20202	0.192308	0.504854
19	38996990	T	C	rs2229146	RYR1	single nucleotide variant	NM_000540.2(RYR1):c.8589T>C (p.Ser2863=)	Malignant hyperthermia susceptibility;Multiminicore Disease;Myopathy, Central Core;Neuromuscular disease, congenital, with uniform type 1 fiber;not provided;not specified	Papuan(HGDP)	0.374636	0.595952	Benign	C	0.239669	0.253648	0.288124	0.262779	0.439446	0.394123	0.245734	0.340311	0.318491	0.243421	0.347109	0.304629	0.261403	0.264243	0.260449	0.458252	0.309121	0.439366	0.347981	0.237931	0.379199	0.299422	0.251599	0.297597	0.484375	0.442623	0.401163	0.403226	0.272727	0.305825	0.395238	0.398936	0.494949	0.313131	0.318681	0.514563
1	64095111	A	G	rs855314	PGM1	single nucleotide variant	NM_002633.2(PGM1):c.262A>G (p.Ile88Val)	Congenital disorder of glycosylation;Congenital disorder of glycosylation type 1t;not provided;not specified	Ju_hoan_North(HuOrigin)	0.131492	0.595781	Likely_benign	G	0.152893	0.150456	0.15555	0.149619	0.247078	0.0695577	0.13148	0.00717781	0.000524384	0	0.00901276	0.132252	0.150663	0.15904	0.149193	0.094787	0.128637	0.246322	0.0898345	0.119718	0.00641849	0.123705	0.148586	0.13628	0.239583	0.278689	0.0523256	0	0.151515	0.00485437	0.0142857	0.138298	0.262626	0.136364	0.126374	0.0970874
1	156106185	T	C	rs505058	LMNA	single nucleotide variant	NM_005572.3(LMNA):c.1338T>C (p.Asp446=)	Cardiovascular phenotype;Charcot-Marie-Tooth disease type 2B1;Charcot-Marie-Tooth disease, type 2;Congenital muscular dystrophy, LMNA-related;Dilated Cardiomyopathy, Dominant;Emery-Dreifuss muscular dystrophy;Emery-Dreifuss muscular dystrophy 3, autosomal recessive;Familial partial lipodystrophy;Hutchinson-Gilford syndrome;Lethal tight skin contracture syndrome;Limb-Girdle Muscular Dystrophy, Rec…	ESN(1KG_phase3)	0.187054	0.595774	Benign	C	0.0726496	0.0685044	0.115175	0.0788795	0.639922	0.0746869	0.132037	0.0197801	0.0159287	0.0202703	0.0208092	0.0558559	0.0734305	0.129339	0.0505833	0.143605	0.0976431	0.62868	0.0872642	0.1	0.0199742	0.0691244	0.0702608	0.0902394	0.635417	0.639344	0.0988372	0.0322581	0.0808081	0.0194175	0.00952381	0.132979	0.782828	0.0656566	0.0714286	0.0825243
16	14041958	T	C	rs1799801	ERCC4	single nucleotide variant	NM_005236.2(ERCC4):c.2505T>C (p.Ser835=)	Xeroderma pigmentosum;not specified	Papuan(HuOrigin)	0.261409	0.595734	Benign	C	0.254167	0.292831	0.317722	0.29731	0.172656	0.232903	0.312426	0.240157	0.242528	0.276316	0.239149	0.235487	0.294486	0.307952	0.2826	0.313492	0.292333	0.173683	0.266509	0.317241	0.242268	0.233736	0.282021	0.272059	0.177083	0.147541	0.238372	0.263441	0.262626	0.208738	0.22381	0.223404	0.126263	0.247475	0.28022	0.31068
11	101454488	G	C	rs3824934	TRPC6	single nucleotide variant	NM_004621.5(TRPC6):c.-254C>G	Focal segmental glomerulosclerosis	BTQ(AAGC)	0.237994	0.595339	Benign	C	NA	NA	NA	NA	NA	NA	NA	NA	NA	NA	NA	NA	NA	NA	NA	NA	NA	0.038011	0.20922	0.12069	0.478177	0.103458	0.0896171	0.118566	0.0104167	0.0655738	0.290698	0.462366	0.0858586	0.470874	0.428571	0.101064	0.0151515	0.106061	0.0659341	0.237864
11	76868372	T	C	rs762667	MYO7A	single nucleotide variant	NM_000260.3(MYO7A):c.783T>C (p.Gly261=)	Nonsyndromic Hearing Loss, Dominant;Nonsyndromic Hearing Loss, Recessive;Retinitis pigmentosa-deafness syndrome;not specified	MbutiPygmy(HGDP)	0.405111	0.594889	Benign	C	0.418803	0.358357	0.334923	0.372108	0.77494	0.469727	0.326201	0.324471	0.368407	0.301587	0.312573	0.455205	0.360069	0.341985	0.360703	0.223803	0.363621	0.765362	0.483491	0.315972	0.321705	0.473487	0.386224	0.406654	0.78125	0.795082	0.180233	0.354839	0.373737	0.368932	0.319048	0.478723	0.878788	0.434343	0.340659	0.257282
3	170715830	G	A	rs5398	SLC2A2	single nucleotide variant	NM_000340.1(SLC2A2):c.1437C>T (p.Phe479=)	Fanconi-Bickel syndrome;not provided;not specified	MbutiPygmy(HGDP)	0.328484	0.594593	Benign	A	0.281513	0.295701	0.317753	0.297769	0.602063	0.285337	0.316093	0.234887	0.22	0.269737	0.238446	0.26177	0.299382	0.3263	0.296554	0.282153	0.307389	0.605221	0.326241	0.275862	0.225974	0.274063	0.290247	0.323475	0.59375	0.508197	0.290698	0.258065	0.287879	0.203883	0.238095	0.351064	0.661616	0.262626	0.241758	0.237864
22	18572431	G	A	rs5992169	PEX26	single nucleotide variant	NM_017929.5(PEX26):c.*1590G>A	Zellweger syndrome	Karitiana(HGDP)	0.119982	0.594303	Likely_benign	A	NA	NA	NA	NA	NA	NA	NA	NA	NA	NA	NA	NA	NA	NA	NA	NA	NA	0.149977	0.276596	0.0965517	0.0667522	0.0402994	0.0654036	0.0652574	0.192708	0.057377	0.0465116	0.0591398	0.0808081	0.0291262	0.0761905	0.196809	0.212121	0.0505051	0.0549451	0.0728155
11	64527080	T	C	rs477549	PYGM	single nucleotide variant	NM_005609.3(PYGM):c.243+48A>G	not specified	Papuan(HGDP)	0.229337	0.594192	Benign	C	0.121739	0.0941928	0.101756	0.0987874	0.371956	0.31521	0.144171	0.378902	0.417453	0.423077	0.368271	0.112979	0.095217	0.0925362	0.0897861	0.198135	0.144228	0.367589	0.29717	0.148276	0.371928	0.1178	0.0982595	0.128913	0.3125	0.377049	0.273256	0.327957	0.121212	0.412621	0.366667	0.218085	0.40404	0.0707071	0.0769231	0.18932
8	55539057	G	A	rs444772	RP1	single nucleotide variant	NM_006269.1(RP1):c.2615G>A (p.Arg872His)	Retinitis Pigmentosa, Dominant;not specified	Papuan(HGDP)	0.288462	0.593891	Likely_benign	A	0.266667	0.274204	0.304043	0.27857	0.159445	0.328452	0.233605	0.44076	0.402778	0.412162	0.451118	0.209722	0.274415	0.284048	0.255951	0.243804	0.277577	0.161595	0.336493	0.22069	0.449032	0.209919	0.270207	0.251386	0.0989583	0.180328	0.27907	0.462366	0.242424	0.417476	0.457143	0.297872	0.116162	0.212121	0.274725	0.26699
5	149447771	G	A	rs34928010	CSF1R	single nucleotide variant	NM_005211.3(CSF1R):c.1626+7C>T	Hereditary diffuse leukoencephalopathy with spheroids	BTQ(AAGC)	0.156212	0.593788	Benign	A	0.0526316	0.0428059	0.0382725	0.0410774	0.270952	0.289965	0.0773102	0.176745	0.138494	0.113333	0.187588	0.0370251	0.0413313	0.0493921	0.0398145	0.122291	0.078	0.265398	0.248821	0.0896552	0.168823	0.032853	0.043625	0.0718232	0.260417	0.172131	0.127907	0.204301	0.030303	0.199029	0.185714	0.154255	0.363636	0.030303	0.043956	0.15534
11	61722645	C	A	rs1109748	BEST1	single nucleotide variant	NM_004183.3(BEST1):c.219C>A (p.Ile73=)	Retinitis Pigmentosa, Recessive;Vitelliform macular dystrophy type 2;Vitreoretinochoroidopathy;not provided;not specified	eas_jpn(gnomAD.exomes)	0.268259	0.593583	Benign	A	0.104167	0.0751789	0.0666087	0.0760041	0.0846873	0.300873	0.0404923	0.680191	0.749738	0.861842	0.65987	0.0698577	0.0766708	0.0925094	0.0824277	0.514505	0.14658	0.0850551	0.252358	0.0551724	0.664499	0.0743945	0.0728464	0.129834	0.0677083	0.0819672	0.575581	0.483871	0.0505051	0.68932	0.604762	0.18617	0.111111	0.0808081	0.115385	0.57767
21	44473425	G	A	rs706209	CBS	single nucleotide variant	NM_000071.2(CBS):c.*565C>T	Homocystinuria	Onge(HuOrigin)	0.40719	0.59281	Benign	A	NA	NA	NA	NA	NA	NA	NA	NA	NA	NA	NA	NA	NA	NA	NA	NA	NA	0.18536	0.283688	0.468966	0.587291	0.478123	0.476456	0.448339	0.177083	0.221311	0.366279	0.548387	0.378788	0.650485	0.566667	0.382979	0.121212	0.439394	0.5	0.485437
8	55541513	T	C	rs414352	RP1	single nucleotide variant	NM_006269.1(RP1):c.5071T>C (p.Ser1691Pro)	Retinitis Pigmentosa, Dominant;not specified	Papuan(HGDP)	0.29051	0.591843	Likely_benign	C	0.264463	0.2744	0.303565	0.278844	0.187231	0.329392	0.233829	0.441279	0.402829	0.421053	0.451671	0.209685	0.274623	0.28427	0.256352	0.241214	0.277596	0.188564	0.337264	0.22069	0.449163	0.209724	0.270005	0.260185	0.125	0.188525	0.27907	0.462366	0.242424	0.417476	0.457143	0.297872	0.141414	0.212121	0.274725	0.257282
8	42274264	G	C	rs6841	SLC20A2	single nucleotide variant	NM_006749.4(SLC20A2):c.*1057C>G	Idiopathic basal ganglia calcification 1	LWK(1KG_phase3)	0.156227	0.591248	Benign	C	NA	NA	NA	NA	NA	NA	NA	NA	NA	NA	NA	NA	NA	NA	NA	NA	NA	0.51497	0.0648585	0.0517241	0.0872914	0.111463	0.0532909	0.102941	0.557292	0.401639	0.0930233	0.134409	0.040404	0.0728155	0.1	0.0797872	0.626263	0.106061	0.043956	0.0873786
10	96066341	A	G	rs2274223	PLCE1	single nucleotide variant	NM_016341.3(PLCE1):c.5780A>G (p.His1927Arg)	Nephrotic syndrome;Nephrotic syndrome, type 3;not specified	Taa_West(HuOrigin)	0.31523	0.59102	Benign	G	0.384298	0.305593	0.365719	0.328293	0.350077	0.168955	0.436581	0.228967	0.248951	0.208955	0.223727	0.222078	0.310454	0.381006	0.265244	0.282727	0.318077	0.344728	0.186761	0.42069	0.217224	0.214738	0.326107	0.296875	0.34375	0.368852	0.255814	0.27957	0.313131	0.18932	0.219048	0.25	0.388889	0.237374	0.340659	0.242718
10	16982244	G	T	rs2271463	CUBN	single nucleotide variant	NM_001081.3(CUBN):c.5343-8C>A	Megaloblastic anemia	Papuan(HuOrigin)	0.23066	0.590769	Benign	T	0.092437	0.175565	0.18655	0.176727	0.222466	0.17119	0.196973	0.288533	0.294596	0.429577	0.285536	0.208125	0.1765	0.192105	0.172502	0.231141	0.185203	0.221685	0.174528	0.193103	0.290116	0.200576	0.172095	0.180556	0.21875	0.262295	0.284884	0.290323	0.19697	0.242718	0.285714	0.12766	0.207071	0.217172	0.159341	0.179612
8	144990528	A	G	rs7014582	PLEC	single nucleotide variant	NM_000445.4(PLEC):c.13542T>C (p.Ala4514=)	not specified	Yoruba(HGDP)	0.409517	0.590483	Benign	G	0.310127	0.43593	0.46501	0.427636	0.848492	0.288373	0.471396	0.152886	0.163346	0.134615	0.150007	0.410817	0.427666	0.450533	0.398276	0.361991	0.421897	0.837064	0.365566	0.455172	0.144416	0.405889	0.416124	0.435305	0.885417	0.803279	0.366279	0.155914	0.444444	0.15534	0.171429	0.441489	0.959596	0.388889	0.417582	0.349515
6	110107517	T	C	rs9885672	FIG4	single nucleotide variant	NM_014845.5(FIG4):c.1961T>C (p.Val654Ala)	Amyotrophic Lateral Sclerosis, Dominant;Charcot-Marie-Tooth disease, type IV;not specified	MbutiPygmy(HGDP)	0.371061	0.590477	Benign	C	0.1375	0.143763	0.182508	0.151463	0.695152	0.27073	0.251985	0.406213	0.358456	0.381579	0.419082	0.222546	0.149811	0.175412	0.14074	0.444615	0.226397	0.696137	0.267139	0.217241	0.420951	0.233026	0.157482	0.242647	0.744792	0.680328	0.436047	0.430108	0.141414	0.417476	0.366667	0.297872	0.858586	0.257576	0.0879121	0.417476
3	58413405	T	C	rs1126737	PDHB	single nucleotide variant	NM_000925.3(PDHB):c.*356A>G	Pyruvate dehydrogenase complex deficiency	eas_jpn(gnomAD.exomes)	0.40959	0.59041	Benign	C	0.313725	0.243953	0.253311	0.257884	0.0714548	0.318182	0.159091	0.818149	0.796574	1	0.824238	0.316922	0.24857	0.29	0.284024	0.400016	0.300452	0.076082	0.317967	0.141379	0.831177	0.304977	0.258587	0.277574	0.0520833	0.0737705	0.563953	0.849462	0.29798	0.800971	0.795238	0.329787	0.040404	0.29798	0.214286	0.398058
16	2140010	A	G	rs7203729	PKD1	single nucleotide variant	NM_001009944.2(PKD1):c.12630T>C (p.Pro4210=)	Polycystic kidney disease, adult type;not specified	GWD(1KG_phase3)	0.201662	0.590374	Benign	G	0.21875	0.186048	0.224387	0.187544	0.648215	0.127325	0.251402	0.000281595	0	0	0.00036169	0.223921	0.188358	0.200337	0.176044	0.0924007	0.19673	0.65263	0.139151	0.241379	0.000641849	0.22764	0.180713	0.210866	0.708333	0.532787	0.0581395	0	0.181818	0	0	0.265957	0.742424	0.257576	0.153846	0.0970874
2	179582537	G	T	rs2627043	TTN	single nucleotide variant	TTN:c.25064C>A (p.Ala8355Glu)	Cardiovascular phenotype;Dilated Cardiomyopathy, Dominant;Distal myopathy Markesbery-Griggs type;Hereditary myopathy with early respiratory failure;Hypertrophic cardiomyopathy;Limb-Girdle Muscular Dystrophy, Recessive;Myopathy, early-onset, with fatal cardiomyopathy;not specified	Ju_hoan_North(HuOrigin)	0.38706	0.590213	Likely_benign	T	0.202586	0.205494	0.209107	0.201256	0.422715	0.411524	0.200299	0.667468	0.653621	0.6	0.671946	0.201619	0.202518	0.199234	0.196844	0.430438	0.26868	0.426664	0.393868	0.189655	0.646641	0.193725	0.200571	0.238007	0.427083	0.459016	0.523256	0.698925	0.19697	0.626214	0.7	0.356383	0.479798	0.217172	0.263736	0.412621
16	8875861	A	G	rs1641032	ABAT	single nucleotide variant	NM_020686.5(ABAT):c.*574A>G	Gamma-aminobutyric acid transaminase deficiency	BTQ(AAGC)	0.409829	0.590171	Benign	G	NA	NA	NA	NA	NA	NA	NA	NA	NA	NA	NA	NA	NA	NA	NA	NA	NA	0.435963	0.41253	0.313793	0.378927	0.317003	0.349425	0.329314	0.453125	0.47541	0.383721	0.33871	0.277778	0.330097	0.333333	0.398936	0.510101	0.282828	0.346154	0.305825
13	32927894	C	T	rs9943876	BRCA2	single nucleotide variant	NM_000059.3(BRCA2):c.7008-1104C>T	Breast-ovarian cancer, familial 2	Karitiana(HGDP)	0.267208	0.589935	Benign	T	NA	NA	NA	NA	NA	NA	NA	NA	NA	NA	NA	NA	NA	NA	NA	NA	NA	0.297909	0.349882	0.244828	0.169666	0.343984	0.306764	0.301471	0.255208	0.368852	0.27907	0.155914	0.328283	0.179612	0.17619	0.37234	0.333333	0.318182	0.324176	0.330097
10	69905300	G	A	rs2817760	MYPN	single nucleotide variant	NM_032578.3(MYPN):c.1130+17G>A	Dilated cardiomyopathy 1KK;not specified	ESN(1KG_phase3)	0.223927	0.589204	Benign	A	0.0791667	0.0772522	0.0991808	0.0793322	0.656743	0.191351	0.0978347	0.17802	0.183106	0.173333	0.176724	0.113732	0.0777365	0.0855214	0.0664039	0.143655	0.128389	0.643515	0.175708	0.141379	0.172704	0.120173	0.0748767	0.130755	0.708333	0.639344	0.104651	0.145161	0.0606061	0.169903	0.180952	0.212766	0.813131	0.111111	0.0714286	0.101942
11	77825275	A	G	rs10899440	ALG8	single nucleotide variant	NM_024079.4(ALG8):c.673+37T>C	not specified	BTQ(AAGC)	0.36942	0.588913	Benign	G	0.491525	0.452274	0.472025	0.455122	0.184582	0.367634	0.404088	0.358698	0.316552	0.266667	0.370815	0.547151	0.459427	0.46003	0.470146	0.406961	0.437582	0.191918	0.398585	0.409722	0.383075	0.547055	0.449695	0.417127	0.161458	0.188525	0.47093	0.360215	0.449495	0.383495	0.395238	0.414894	0.146465	0.484848	0.406593	0.38835
21	44473446	A	G	rs706208	CBS	single nucleotide variant	NM_000071.2(CBS):c.*544T>C	Homocystinuria	Onge(HuOrigin)	0.411607	0.588393	Benign	G	NA	NA	NA	NA	NA	NA	NA	NA	NA	NA	NA	NA	NA	NA	NA	NA	NA	0.185202	0.283019	0.468966	0.583763	0.478136	0.47603	0.448435	0.177083	0.221311	0.372093	0.553763	0.378788	0.650485	0.566667	0.382979	0.121212	0.439394	0.5	0.485437
11	46897446	G	A	rs2306033	LRP4	single nucleotide variant	NM_002334.3(LRP4):c.3608C>T (p.Ala1203Val)	Syndactyly Cenani Lenz type	Pima(HGDP)	0.233052	0.588376	Benign	A	0.165289	0.128934	0.0806508	0.128132	0.0284923	0.398061	0.0562723	0.622307	0.620283	0.618421	0.622884	0.241746	0.124545	0.118441	0.132771	0.194648	0.152089	0.0300622	0.330189	0.0793103	0.617419	0.242232	0.141361	0.173432	0.0104167	0.0327869	0.238372	0.709677	0.0959596	0.514563	0.647619	0.202128	0	0.207071	0.10989	0.179612
9	21864535	A	G	rs3802394	MTAP	single nucleotide variant	NM_002451.3(MTAP):c.*2522A>G	Diaphyseal medullary stenosis with malignant fibrous histiocytoma	Karitiana(HGDP)	0.304614	0.588243	Benign	G	NA	NA	NA	NA	NA	NA	NA	NA	NA	NA	NA	NA	NA	NA	NA	NA	NA	0.16659	0.416076	0.189655	0.395619	0.21445	0.218774	0.254596	0.104167	0.270492	0.215116	0.392473	0.227273	0.446602	0.390476	0.425532	0.0454545	0.151515	0.186813	0.26699
7	21603886	A	G	rs4392792	DNAH11	single nucleotide variant	NM_001277115.1(DNAH11):c.1065A>G (p.Pro355=)	Ciliary dyskinesia;not specified	Karitiana(HuOrigin)	0.203761	0.587905	Likely_benign	G	0.0826446	0.0320142	0.0406404	0.0383461	0.236461	0.329719	0.0235727	0.330139	0.297581	0.246269	0.33978	0.0582799	0.0370588	0.0627348	0.0390414	0.136477	0.0898671	0.227973	0.276596	0.037931	0.336563	0.0569948	0.044622	0.0983456	0.223958	0.237705	0.186047	0.446237	0.030303	0.305825	0.319048	0.234043	0.242424	0.0353535	0.0274725	0.116505
14	65241228	A	G	rs229592	SPTB	single nucleotide variant	NM_001355436.2(SPTB):c.4860T>C (p.Ile1620=)	Elliptocytosis;Spherocytosis, Dominant;not specified	MbutiPygmy(HGDP)	0.412798	0.587202	Likely_benign	G	0.268868	0.239318	0.279139	0.251503	0.76363	0.324571	0.284247	0.467012	0.508118	0.511364	0.457438	0.34085	0.24516	0.266467	0.241355	0.29905	0.31875	0.758824	0.341608	0.310345	0.457419	0.331892	0.248597	0.301105	0.796875	0.754098	0.319767	0.33871	0.217172	0.519417	0.504762	0.303191	0.853535	0.313131	0.247253	0.402913
10	102568983	A	C	rs1800898	PAX2	single nucleotide variant	NM_000278.4(PAX2):c.909A>C (p.Pro303=)	Renal coloboma syndrome;not provided;not specified	ESN(1KG_phase3)	0.31208	0.58691	Benign	C	0.226891	0.282719	0.325183	0.284574	0.748521	0.194072	0.250645	0.098564	0.097957	0.126667	0.0984323	0.176443	0.282289	0.318045	0.256889	0.3225	0.271778	0.744575	0.224057	0.255172	0.0771208	0.186744	0.264496	0.252768	0.796875	0.672131	0.226744	0.102151	0.277778	0.0776699	0.0952381	0.265957	0.89899	0.207071	0.21978	0.26699
2	27323385	C	T	rs1131375	KHK	single nucleotide variant	NM_000221.2(KHK):c.*767C>T	Fructosuria, essential	Karitiana(HGDP)	0.341774	0.586798	Benign	T	0.392857	0.367207	0.382284	0.379616	0.178994	0.605137	0.379076	0.231518	0.280177	0.176471	0.220362	0.343541	0.372702	0.413223	0.376896	0.317158	0.387304	0.184763	0.582547	0.403448	0.243557	0.349741	0.377909	0.371771	0.192708	0.188525	0.331395	0.177419	0.368687	0.364078	0.228571	0.393617	0.111111	0.353535	0.340659	0.242718
11	46745003	C	T	rs5896	F2	single nucleotide variant	NM_000506.4(F2):c.494C>T (p.Thr165Met)	Hereditary factor II deficiency disease;Venous thrombosis;not specified	Pima(HGDP)	0.234704	0.586724	Likely_benign	T	0.169421	0.133352	0.0863359	0.132463	0.0292959	0.400098	0.0758929	0.606715	0.611315	0.613333	0.605428	0.24249	0.128678	0.127715	0.134988	0.201542	0.155853	0.0302647	0.336085	0.0931034	0.598446	0.243797	0.144857	0.173432	0.0104167	0.0409836	0.232558	0.682796	0.10101	0.495146	0.638095	0.207447	0	0.207071	0.10989	0.199029
1	207967719	T	C	rs7144	CD46	single nucleotide variant	NM_002389.4(CD46):c.*897T>C	Atypical hemolytic uremic syndrome	Karitiana(HuOrigin)	0.330236	0.586431	Benign	C	NA	NA	NA	NA	NA	NA	NA	NA	NA	NA	NA	NA	NA	NA	NA	NA	NA	0.41682	0.523697	0.306897	0.145887	0.43318	0.396816	0.384191	0.416667	0.483607	0.261628	0.0806452	0.414141	0.165049	0.114286	0.489362	0.409091	0.459596	0.373626	0.330097
16	2125788	C	T	rs13331451	TSC2	single nucleotide variant	NM_000548.4(TSC2):c.2546-12C>T	Tuberous sclerosis syndrome;not specified	GWD(1KG_phase3)	0.130408	0.586406	Benign	T	0.0745614	0.0684125	0.0662629	0.0683038	0.548653	0.0637122	0.0734441	0.000327118	0	0	0.000417246	0.0974081	0.0711509	0.0550459	0.0825956	0.0477622	0.0791721	0.548662	0.0770142	0.0689655	0.00064433	0.0989613	0.0649688	0.0904059	0.510417	0.516393	0.0290698	0	0.0757576	0	0	0.0904255	0.60101	0.126263	0.0549451	0.0631068
11	75283653	C	A	rs6704	SERPINH1	single nucleotide variant	NM_001235.3(SERPINH1):c.*525C>A	Osteogenesis Imperfecta, Recessive	BTQ(AAGC)	0.33115	0.585517	Benign	A	NA	NA	NA	NA	NA	NA	NA	NA	NA	NA	NA	NA	NA	NA	NA	NA	NA	0.340935	0.344048	0.293103	0.171594	0.37464	0.335045	0.3407	0.354167	0.344262	0.52907	0.150538	0.272727	0.145631	0.195238	0.393617	0.348485	0.353535	0.263736	0.533981
2	47698702	A	G	rs17036614	MSH2	single nucleotide variant	NM_000251.2(MSH2):c.1759+501A>G	Lynch syndrome	BTQ(AAGC)	0.164798	0.585202	Benign	G	NA	NA	NA	NA	NA	NA	NA	NA	NA	NA	NA	NA	NA	NA	NA	NA	NA	0.0266299	0.168632	0.0758621	0.530928	0.116292	0.103683	0.121547	0.0104167	0.0409836	0.22093	0.650538	0.0858586	0.461165	0.452381	0.138298	0	0.0505051	0.0934066	0.11165
3	122003769	A	G	rs1042636	CASR	single nucleotide variant	NM_001178065.1(CASR):c.2998A>G (p.Arg1000Gly)	Familial hypocalciuric hypercalcemia;Hypocalcemia;Hypoparathyroidism familial isolated;Neonatal severe hyperparathyroidism;not specified	Nganasans(Estonian_Biocentre)	0.200792	0.584922	Benign	G	0.0950413	0.0760973	0.049226	0.069657	0.0419025	0.269594	0.0400794	0.530085	0.506027	0.546053	0.5363	0.106341	0.074335	0.0614693	0.0892105	0.207481	0.115171	0.0461751	0.229953	0.062069	0.507079	0.11191	0.0849326	0.121547	0.0260417	0.0409836	0.302326	0.494624	0.0707071	0.524272	0.566667	0.138298	0.0454545	0.0858586	0.104396	0.296117
2	203431804	A	G	rs3731696	BMPR2	single nucleotide variant	NM_001204.6(BMPR2):c.*7135A>G	Primary pulmonary hypertension	BTQ(AAGC)	0.123528	0.584806	Benign	G	NA	NA	NA	NA	NA	NA	NA	NA	NA	NA	NA	NA	NA	NA	NA	NA	NA	0.0234267	0.145047	0.0655172	0.121622	0.12205	0.124368	0.102941	0.00520833	0.0409836	0.215116	0.209677	0.141414	0.101942	0.109524	0.180851	0	0.151515	0.153846	0.218447
16	23200848	T	C	rs5735	SCNN1G	single nucleotide variant	NM_001039.3(SCNN1G):c.474T>C (p.Ile158=)	Pseudohypoaldosteronism type 1 autosomal recessive;Pseudoprimary hyperaldosteronism;not provided;not specified	Karitiana(HuOrigin)	0.291359	0.583641	Benign	C	0.38843	0.310573	0.304503	0.311351	0.156804	0.436253	0.30496	0.172067	0.150864	0.151316	0.177898	0.367156	0.31401	0.321964	0.3254	0.269517	0.312378	0.148944	0.414894	0.32069	0.180128	0.354143	0.334654	0.299263	0.125	0.139344	0.267442	0.16129	0.338384	0.160194	0.204762	0.276596	0.111111	0.39899	0.346154	0.194175
13	39264690	T	C	rs2496425	FREM2	single nucleotide variant	NM_207361.5(FREM2):c.3209T>C (p.Phe1070Ser)	Cryptophthalmos syndrome;not specified	MbutiPygmy(HGDP)	0.416425	0.583575	Benign	C	0.177686	0.262603	0.277343	0.259406	0.762766	0.435014	0.317857	0.398663	0.362493	0.361842	0.408625	0.314218	0.26644	0.288231	0.274776	0.291781	0.321987	0.755643	0.412736	0.327586	0.434194	0.317319	0.266524	0.340993	0.807292	0.704918	0.284884	0.403226	0.29798	0.393204	0.480952	0.398936	0.868687	0.252525	0.21978	0.315534
5	127873605	T	C	rs7732639	FBN2	single nucleotide variant	NM_001999.3(FBN2):c.-309A>G	Congenital contractural arachnodactyly	ESN(1KG_phase3)	0.376164	0.583432	Benign	C	NA	NA	NA	NA	NA	NA	NA	NA	NA	NA	NA	NA	NA	NA	NA	NA	NA	0.810699	0.246429	0.268966	0.147815	0.285755	0.301915	0.321627	0.869792	0.778689	0.273256	0.204301	0.277778	0.199029	0.152381	0.329787	0.959596	0.318182	0.324176	0.354369
19	33333155	G	A	rs2287881	SLC7A9	single nucleotide variant	NM_014270.4(SLC7A9):c.1143C>T (p.Ala381=)	Cystinuria	Papuan(HGDP)	0.211083	0.583035	Likely_benign	A	0.181818	0.198842	0.187348	0.190739	0.319569	0.122831	0.139881	0.192952	0.156627	0.25	0.20197	0.225213	0.19535	0.177154	0.200681	0.250033	0.188132	0.324517	0.153302	0.162069	0.197419	0.223949	0.196016	0.221402	0.28125	0.278689	0.226744	0.198925	0.19697	0.199029	0.242857	0.159574	0.29798	0.237374	0.302198	0.286408
2	179638721	C	T	rs4894048	TTN	single nucleotide variant	NM_133378.4(TTN):c.7174G>A (p.Gly2392Ser)	Cardiovascular phenotype;Dilated Cardiomyopathy, Dominant;Distal myopathy Markesbery-Griggs type;Hereditary myopathy with early respiratory failure;Hypertrophic cardiomyopathy;Limb-Girdle Muscular Dystrophy, Recessive;Myopathy, early-onset, with fatal cardiomyopathy;not provided;not specified	Pima(HGDP)	0.059905	0.582952	Likely_benign	T	0.0247934	0.0225021	0.0180534	0.0226227	0.0946345	0.187449	0.0339758	0.0187323	0.00475185	0	0.0226012	0.0560894	0.0233436	0.0236132	0.0278288	0.152349	0.0566623	0.0915671	0.165094	0.0243056	0.0218228	0.0541475	0.022117	0.046875	0.0885417	0.155738	0.168605	0.0215054	0.0252525	0.0145631	0.00952381	0.154255	0.0808081	0.0707071	0.0274725	0.15534
13	39266484	G	A	rs1868463	FREM2	single nucleotide variant	NM_207361.5(FREM2):c.5003G>A (p.Arg1668His)	Cryptophthalmos syndrome;not specified	Papuan(HGDP)	0.123391	0.582491	Likely_benign	A	0.0338983	0.0472424	0.0746136	0.0509897	0.0433598	0.0365579	0.145674	0.235323	0.26637	0.297297	0.226389	0.018515	0.0505078	0.0538287	0.0444581	0.179168	0.0756231	0.0448276	0.0518868	0.12069	0.223157	0.0218642	0.0452366	0.0597426	0.0416667	0.0901639	0.215116	0.263441	0.0505051	0.271845	0.219048	0.037234	0.0606061	0.020202	0.0384615	0.228155
16	89998930	C	T	rs28593634	TUBB3	single nucleotide variant	NM_006086.3(TUBB3):c.58-49C>T	not specified	GWD(1KG_phase3)	0.129918	0.582472	Likely_benign	T	0.05	0.0662457	0.122203	0.0769358	0.482129	0.0694275	0.0984378	0.000871365	0.000787815	0.0266667	0.000624826	0.0285289	0.0738474	0.115849	0.0570639	0.123853	0.0982554	0.48011	0.0851064	0.113793	0	0.0333717	0.0626945	0.0974265	0.494792	0.47541	0.145349	0.00537634	0.0808081	0	0	0.0638298	0.479798	0.010101	0.0824176	0.165049
19	11687195	C	T	rs2229531	ACP5	single nucleotide variant	NM_001111035.2(ACP5):c.598G>A (p.Val200Met)	not specified	Papuan(HGDP)	0.094145	0.582326	Benign	T	0.0897436	0.118671	0.120611	0.117157	0.0269192	0.0613079	0.0884761	0.0839165	0.0744625	0.0902778	0.0863681	0.131445	0.114729	0.124431	0.102217	0.0925877	0.118867	0.0281674	0.0601415	0.127586	0.0917843	0.146313	0.116139	0.109375	0.0104167	0.0163934	0.0988372	0.150538	0.111111	0.0728155	0.119048	0.0744681	0.010101	0.141414	0.104396	0.0970874
17	1657653	G	A	rs1057335	SERPINF2	single nucleotide variant	NM_000934.3(SERPINF2):c.1301G>A (p.Arg434Lys)	not specified	Papuan(HGDP)	0.21215	0.581968	Benign	A	0.2125	0.184886	0.168696	0.182197	0.209671	0.26492	0.171797	0.142981	0.122053	0.157895	0.148364	0.184116	0.182938	0.178036	0.18717	0.375024	0.200424	0.215271	0.247642	0.193103	0.137532	0.174539	0.189666	0.20941	0.244792	0.172131	0.290698	0.155914	0.237374	0.121359	0.114286	0.234043	0.191919	0.146465	0.214286	0.432039
21	43792869	C	T	rs13047838	TMPRSS3	single nucleotide variant	NM_024022.2(TMPRSS3):c.*2G>A	Nonsyndromic Hearing Loss, Recessive;not specified	Papuan(HuOrigin)	0.275179	0.581964	Likely_benign	T	0.181818	0.214177	0.248957	0.213382	0.0725271	0.157482	0.257242	0.566416	0.546719	0.572368	0.571557	0.188765	0.211381	0.21964	0.18738	0.350666	0.235342	0.070771	0.168632	0.225694	0.555627	0.183468	0.198349	0.22037	0.078125	0.0983607	0.401163	0.575269	0.252525	0.5	0.604762	0.154255	0.010101	0.19697	0.258242	0.378641
10	54525509	A	C	rs2506	MBL2	single nucleotide variant	NM_000242.2(MBL2):c.*2388T>G	Mannose-binding protein deficiency	Taa_West(HuOrigin)	0.293174	0.581826	Likely_benign	C	NA	NA	NA	NA	NA	NA	NA	NA	NA	NA	NA	NA	NA	NA	NA	NA	NA	0.539295	0.191038	0.172414	0.263835	0.237875	0.234549	0.235185	0.583333	0.434426	0.244186	0.252688	0.257576	0.26699	0.27619	0.292553	0.636364	0.232323	0.236264	0.145631
17	41218805	A	G	rs8176236	BRCA1	single nucleotide variant	NM_007294.3(BRCA1):c.5074+820T>C	Breast-ovarian cancer, familial 1	Ju_hoan_North(HuOrigin)	0.100002	0.581816	Benign	G	NA	NA	NA	NA	NA	NA	NA	NA	NA	NA	NA	NA	NA	NA	NA	NA	NA	0.348984	0.016129	0.0142857	0	0.00225952	0.00744167	0.0265748	0.34375	0.327869	0.0232558	0	0.00505051	0	0	0.0531915	0.454545	0	0.00549451	0.0291262
2	158593357	A	G	rs12997	ACVR1	single nucleotide variant	NM_001105.4(ACVR1):c.*686T>C	Progressive myositis ossificans	MSL(1KG_phase3)	0.39482	0.58165	Benign	G	NA	NA	NA	NA	NA	NA	NA	NA	NA	NA	NA	NA	NA	NA	NA	NA	NA	0.840069	0.248821	0.313793	0.334833	0.229131	0.283156	0.286372	0.864583	0.868852	0.209302	0.327957	0.287879	0.296117	0.309524	0.260638	0.964646	0.207071	0.340659	0.165049
1	116239633	T	G	rs4348723	CASQ2;VANGL1	single nucleotide variant	NM_138959.2(VANGL1):c.*5633T>G	Catecholaminergic polymorphic ventricular tachycardia;Caudal dysgenesis syndrome;Neural tube defect	BTQ(AAGC)	0.252448	0.580885	Likely_benign	G	NA	NA	NA	NA	NA	NA	NA	NA	NA	NA	NA	NA	NA	NA	NA	NA	NA	0.28463	0.29717	0.151724	0.356959	0.213998	0.204722	0.199449	0.317708	0.229508	0.27907	0.467742	0.247475	0.305825	0.409524	0.287234	0.287879	0.186869	0.214286	0.208738
20	43957510	G	A	rs985586	RBPJL	single nucleotide variant	NM_002999.3(SDC4):c.446-1455C>T	Diabetes mellitus type 2	Onge(HuOrigin)	0.283094	0.580543	Benign	A	NA	NA	NA	NA	NA	NA	NA	NA	NA	NA	NA	NA	NA	NA	NA	NA	NA	0.32919	0.154762	0.17931	0.393041	0.25748	0.234464	0.267035	0.302083	0.303279	0.209302	0.510753	0.262626	0.427184	0.419048	0.234043	0.434343	0.30303	0.296703	0.218447
5	233734	C	G	rs1041949	SDHA	single nucleotide variant	NM_004168.3(SDHA):c.1038C>G (p.Ser346=)	Hereditary cancer-predisposing syndrome;Leigh syndrome;Mitochondrial complex II deficiency;Pheochromocytoma;not specified	MSL(1KG_phase3)	0.195938	0.580533	Likely_benign	G	0.0785124	0.132695	0.144211	0.126735	0.575181	0.190933	0.174405	0.0607807	0.053955	0.0131579	0.0630893	0.0860906	0.128374	0.11236	0.118466	0.0905736	0.152443	0.557998	0.182783	0.165517	0.0494223	0.0834773	0.112279	0.133272	0.614583	0.631148	0.116279	0.0483871	0.111111	0.0631068	0.052381	0.228723	0.621212	0.0757576	0.131868	0.0582524
17	56290334	T	C	rs3826300	MKS1	single nucleotide variant	NM_017777.3(MKS1):c.858+9A>G	Bardet-Biedl syndrome;Meckel-Gruber syndrome;not specified	MbutiPygmy(HGDP)	0.419554	0.580446	Benign	C	0.524793	0.432873	0.412895	0.448906	0.803228	0.27724	0.453932	0.208366	0.16527	0.164179	0.220519	0.526206	0.445846	0.453794	0.475979	0.438922	0.427441	0.79447	0.300708	0.448276	0.207254	0.513817	0.455924	0.474122	0.822917	0.713115	0.331395	0.247312	0.409091	0.179612	0.214286	0.382979	0.919192	0.565657	0.428571	0.466019
10	43623812	C	T	rs17028	RET	single nucleotide variant	NM_020975.5(RET):c.*95C>T	Hirschsprung Disease, Dominant;Multiple endocrine neoplasia;Pheochromocytoma;Renal adysplasia	Karitiana(HuOrigin)	0.169571	0.580429	Likely_benign	T	NA	NA	NA	NA	NA	NA	NA	NA	NA	NA	NA	NA	NA	NA	NA	NA	NA	0.0405467	0.159198	0.196552	0.252896	0.282096	0.218985	0.226015	0.015625	0.0491803	0.186047	0.231183	0.191919	0.242718	0.22381	0.170213	0	0.267677	0.186813	0.101942
18	3126811	A	G	rs1071600	MYOM1	single nucleotide variant	NM_003803.3(MYOM1):c.2879T>C (p.Ile960Thr)	Cardiovascular phenotype;not specified	Papuan(HGDP)	0.243106	0.580423	Benign	G	0.141667	0.133195	0.177623	0.146295	0.267871	0.231704	0.156387	0.320494	0.357445	0.393939	0.309719	0.183564	0.143231	0.160768	0.139135	0.242867	0.184298	0.26583	0.228774	0.151724	0.304516	0.184801	0.141577	0.162684	0.328125	0.229508	0.244186	0.301075	0.171717	0.364078	0.295238	0.202128	0.30303	0.141414	0.142857	0.223301
9	4299453	C	T	rs7852293	GLIS3	single nucleotide variant	NM_001042413.1(GLIS3):c.-131G>A	Diabetes mellitus, neonatal, with congenital hypothyroidism	YRI(1KG_phase3)	0.340886	0.58041	Benign	T	NA	NA	NA	NA	NA	NA	NA	NA	NA	NA	NA	NA	NA	NA	NA	NA	NA	0.779466	0.341232	0.317241	0.186452	0.243228	0.28577	0.290976	0.875	0.754098	0.267442	0.139785	0.30303	0.184466	0.195238	0.462766	0.818182	0.29798	0.285714	0.213592
3	111368813	C	T	rs3733176	CD96	single nucleotide variant	NM_198196.2(CD96):c.*160C>T	C syndrome	Ju_hoan_North(HuOrigin)	0.260621	0.580288	Benign	T	NA	NA	NA	NA	NA	NA	NA	NA	NA	NA	NA	NA	NA	NA	NA	NA	NA	0.445697	0.232861	0.193103	0.272144	0.238479	0.176551	0.217311	0.489583	0.377049	0.226744	0.317204	0.207071	0.218447	0.32381	0.180851	0.520202	0.19697	0.197802	0.252427
15	23046404	T	C	rs12902722	NIPA1	single nucleotide variant	NM_144599.4(NIPA1):c.*2425A>G	Spastic paraplegia, autosomal dominant	BTQ(AAGC)	0.211393	0.580274	Benign	C	NA	NA	NA	NA	NA	NA	NA	NA	NA	NA	NA	NA	NA	NA	NA	NA	NA	0.0276693	0.163915	0.158621	0.441214	0.0610599	0.126817	0.103131	0.015625	0.0245902	0.19186	0.370968	0.166667	0.427184	0.485714	0.148936	0	0.0757576	0.164835	0.179612
2	225362478	C	T	rs3738952	CUL3	single nucleotide variant	NM_003590.4(CUL3):c.1699G>A (p.Val567Ile)	Pseudohypoaldosteronism type 1 autosomal dominant;not specified	Koryaks(Estonian_Biocentre)	0.153072	0.580261	Benign	T	0.0578512	0.093078	0.0963918	0.0903295	0.0255416	0.211717	0.0641255	0.270119	0.337368	0.246667	0.252636	0.0971323	0.095016	0.0858965	0.104348	0.195167	0.127371	0.0305747	0.1875	0.0862069	0.270914	0.0923254	0.0871625	0.129151	0	0.0655738	0.226744	0.22043	0.0757576	0.257282	0.247619	0.180851	0.00505051	0.0959596	0.0714286	0.203883
9	101908915	G	A	rs334354	TGFBR1	single nucleotide variant	NM_004612.3(TGFBR1):c.1255+24G>A	not specified	Onge(HuOrigin)	0.28338	0.580256	Benign	A	0.22314	0.201187	0.195694	0.198627	0.246647	0.230013	0.195808	0.441929	0.471579	0.493421	0.433574	0.143583	0.195224	0.173538	0.183377	0.222073	0.205815	0.256319	0.232311	0.206897	0.421053	0.136521	0.213534	0.19761	0.239583	0.319672	0.215116	0.521505	0.19697	0.461165	0.328571	0.276596	0.191919	0.176768	0.247253	0.23301
3	64082964	C	T	rs26939	PRICKLE2	single nucleotide variant	NM_198859.3(PRICKLE2):c.*1763G>A	Progressive myoclonic epilepsy	Karitiana(HGDP)	0.384157	0.580129	Benign	T	NA	NA	NA	NA	NA	NA	NA	NA	NA	NA	NA	NA	NA	NA	NA	NA	NA	0.226467	0.464539	0.293103	0.4375	0.379678	0.374594	0.37477	0.223958	0.254098	0.5	0.467742	0.348485	0.432039	0.366667	0.452128	0.20202	0.353535	0.362637	0.475728
11	77850517	C	A	rs10793289	ALG8	single nucleotide variant	NM_024079.4(ALG8):c.95+23G>T	not specified	BTQ(AAGC)	0.378291	0.580042	Benign	A	0.518692	0.455271	0.473129	0.463334	0.188186	0.370274	0.41526	0.372756	0.339613	0.37234	0.379673	0.547662	0.45977	0.47012	0.481166	0.414131	0.433678	0.195268	0.395981	0.427083	0.395379	0.549048	0.456544	0.424354	0.161458	0.196721	0.488372	0.365591	0.459596	0.417476	0.409524	0.414894	0.146465	0.484848	0.412088	0.38835
2	170096018	G	A	rs830973	LRP2	single nucleotide variant	NM_004525.3(LRP2):c.4294+19C>T	not specified	Karitiana(HGDP)	0.420296	0.579704	Benign	A	0.363636	0.303019	0.327412	0.323123	0.393675	0.583194	0.352649	0.465688	0.455998	0.421053	0.468724	0.303281	0.313151	0.348576	0.307295	0.570999	0.349527	0.398086	0.547393	0.362069	0.47426	0.297173	0.319675	0.328729	0.411458	0.352459	0.622093	0.467742	0.292929	0.451456	0.47619	0.409574	0.419192	0.373737	0.307692	0.587379
2	27688601	C	T	rs1647276	IFT172	single nucleotide variant	NM_015662.2(IFT172):c.1829+12G>A	not specified	Pima(HGDP)	0.384642	0.579644	Benign	T	0.376033	0.384873	0.310889	0.372883	0.672613	0.56447	0.338633	0.151644	0.115911	0.0986842	0.161606	0.428168	0.382508	0.30997	0.42902	0.421556	0.396636	0.679801	0.554502	0.317241	0.157014	0.430925	0.388274	0.415285	0.734375	0.696721	0.453488	0.188172	0.409091	0.121359	0.180952	0.361702	0.717172	0.459596	0.362637	0.514563
13	20713651	A	G	rs60759737	GJA3	single nucleotide variant	NM_021954.3(GJA3):c.*2469T>C	Zonular Pulverulent Cataract	Damara(HuOrigin)	0.128773	0.579561	Benign	G	NA	NA	NA	NA	NA	NA	NA	NA	NA	NA	NA	NA	NA	NA	NA	NA	NA	0.337057	0.0919811	0.0655172	0	0.199482	0.141059	0.176471	0.390625	0.303279	0.0988372	0	0.111111	0	0	0.0904255	0.39899	0.181818	0.126374	0.121359
4	9922130	C	T	rs3733591	SLC2A9	single nucleotide variant	NM_020041.2(SLC2A9):c.881G>A (p.Arg294His)	Familial renal hypouricemia	BTQ(AAGC)	0.295858	0.579142	Benign	T	0.198347	0.188714	0.161557	0.189377	0.0668064	0.223228	0.157367	0.671388	0.703207	0.730263	0.662361	0.240455	0.189372	0.19283	0.20223	0.362511	0.220953	0.0691672	0.238208	0.131034	0.643686	0.228555	0.195079	0.233886	0.0208333	0.114754	0.436047	0.709677	0.186869	0.660194	0.671429	0.159574	0.040404	0.232323	0.164835	0.407767
2	27667297	A	G	rs4803	IFT172	single nucleotide variant	NM_015662.2(IFT172):c.*2T>C	not specified	Pima(HGDP)	0.385337	0.578949	Benign	G	0.372881	0.384827	0.306749	0.372027	0.671662	0.562463	0.339036	0.152148	0.119098	0.10274	0.161372	0.426913	0.381178	0.308647	0.426618	0.420572	0.39465	0.679797	0.558057	0.3125	0.157861	0.430259	0.38899	0.411439	0.734375	0.696721	0.453488	0.188172	0.409091	0.121359	0.180952	0.361702	0.717172	0.459596	0.362637	0.514563
3	100944932	A	G	rs75852013	IMPG2	single nucleotide variant	NM_016247.3(IMPG2):c.*881T>C	Retinitis Pigmentosa, Recessive	Onge(HuOrigin)	0.148359	0.578913	Likely_benign	G	NA	NA	NA	NA	NA	NA	NA	NA	NA	NA	NA	NA	NA	NA	NA	NA	NA	0.12112	0.0891566	0.143357	0.184655	0.0894953	0.129472	0.11236	0.109375	0.0819672	0.19186	0.182796	0.10101	0.140777	0.2	0.101064	0.106061	0.131313	0.0989011	0.169903
10	90984990	G	A	rs2297472	LIPA	single nucleotide variant	NM_000235.3(LIPA):c.539-5C>T	Wolman disease;not provided;not specified	Karitiana(HGDP)	0.349723	0.578849	Benign	A	0.210744	0.187545	0.190211	0.191438	0.100629	0.4716	0.237438	0.737725	0.768989	0.716216	0.729658	0.26104	0.192691	0.201274	0.202503	0.314694	0.263235	0.103869	0.43026	0.251724	0.737821	0.25072	0.188262	0.237132	0.130208	0.114754	0.354651	0.591398	0.191919	0.757282	0.733333	0.260638	0.106061	0.287879	0.225275	0.300971
17	1554770	A	G	rs1802491	PRPF8	single nucleotide variant	NM_006445.3(PRPF8):c.6588T>C (p.His2196=)	Retinitis Pigmentosa, Dominant	LWK(1KG_phase3)	0.168873	0.578602	Likely_benign	G	0.0661157	0.0554029	0.0877955	0.0675379	0.557593	0.0530211	0.133161	0.0700228	0.0495024	0.0460526	0.0757072	0.0769089	0.062255	0.0925094	0.05269	0.0964918	0.0861564	0.550726	0.0744681	0.151724	0.0669241	0.0754608	0.0610801	0.0930018	0.578125	0.516393	0.0813953	0.0967742	0.0707071	0.101942	0.0904762	0.0638298	0.641414	0.0757576	0.043956	0.140777
6	129670548	C	T	rs17057158	LAMA2	single nucleotide variant	NM_000426.3(LAMA2):c.4523+19C>T	Merosin deficient congenital muscular dystrophy;not specified	Karitiana(HGDP)	0.100054	0.578517	Benign	T	0.053719	0.0539507	0.0840153	0.0628113	0.112458	0.189489	0.0846902	0.0312806	0.00972149	0.0394737	0.036883	0.0491811	0.0607318	0.082084	0.0568443	0.1332	0.0881682	0.111635	0.16152	0.0972222	0.029525	0.0522648	0.0545242	0.0755064	0.104167	0.122951	0.110465	0.0537634	0.0909091	0.0242718	0.0333333	0.111702	0.111111	0.0555556	0.0714286	0.126214
14	88407888	A	G	rs398607	GALC	single nucleotide variant	NM_000153.3(GALC):c.1685T>C (p.Ile562Thr)	Galactosylceramide beta-galactosidase deficiency;not specified	Papuan(HuOrigin);Papuan(HGDP)	0.421593	0.578407	Benign	G	0.441176	0.478967	0.447957	0.469834	0.610026	0.316426	0.485168	0.175128	0.165354	0.230769	0.177268	0.479281	0.474854	0.460961	0.487611	0.420442	0.445071	0.597398	0.34279	0.496552	0.141276	0.481546	0.468758	0.464022	0.619792	0.622951	0.389535	0.225806	0.484848	0.169903	0.242857	0.367021	0.621212	0.434343	0.521978	0.393204
2	172330393	A	G	rs3731983	DCAF17	single nucleotide variant	NM_025000.3(DCAF17):c.999A>G (p.Gln333=)	Hypogonadism, diabetes mellitus, alopecia, mental retardation and electrocardiographic abnormalities;not specified	Chukchis(HuOrigin)	0.247714	0.578373	Benign	G	0.235294	0.195816	0.191352	0.196798	0.166543	0.358488	0.259281	0.17428	0.24934	0.309211	0.153131	0.209429	0.196225	0.207271	0.196858	0.286476	0.215715	0.171724	0.331354	0.241379	0.148718	0.207998	0.199792	0.205882	0.203125	0.139344	0.255814	0.107527	0.19697	0.199029	0.142857	0.239362	0.151515	0.227273	0.142857	0.257282
4	104640935	A	G	rs3733632	TACR3	single nucleotide variant	NM_001059.2(TACR3):c.-103T>C	Isolated GnRH Deficiency	Yoruba(HGDP)	0.326489	0.578273	Benign	G	NA	NA	NA	NA	NA	NA	NA	NA	NA	NA	NA	NA	NA	NA	NA	NA	NA	0.730592	0.228673	0.144828	0.358892	0.169257	0.152366	0.201287	0.744792	0.704918	0.389535	0.354839	0.176768	0.291262	0.32381	0.191489	0.883838	0.156566	0.175824	0.383495
1	94466659	A	G	rs1801555	ABCA4	single nucleotide variant	NM_000350.2(ABCA4):c.6285T>C (p.Asp2095=)	Cone-Rod Dystrophy, Recessive;Macular degeneration;Retinitis Pigmentosa, Recessive;Stargardt Disease, Recessive;not provided;not specified	ESN(1KG_phase3)	0.224836	0.578195	Benign	G	0.0982906	0.115643	0.158992	0.119891	0.664897	0.0987154	0.192843	0.148596	0.13937	0.164474	0.150867	0.0736576	0.115374	0.147147	0.0873794	0.167767	0.147011	0.64752	0.111111	0.182759	0.154884	0.0702765	0.111061	0.158041	0.703125	0.606557	0.203488	0.16129	0.111111	0.15534	0.185714	0.111702	0.80303	0.0606061	0.115385	0.145631
2	74690378	C	T	rs1063588	MOGS	single nucleotide variant	NM_006302.2(MOGS):c.715G>A (p.Asp239Asn)	Congenital disorder of glycosylation;not specified	Jehai.Affx(NegPyg)	0.398206	0.577985	Benign	T	0.0826446	0.135648	0.140554	0.133333	0.734918	0.25252	0.125	0.840972	0.84966	0.850746	0.838514	0.135516	0.137155	0.125281	0.144324	0.280047	0.203068	0.732019	0.264775	0.134483	0.840645	0.1322	0.125959	0.183579	0.770833	0.696721	0.395349	0.83871	0.126263	0.839806	0.809524	0.255319	0.883838	0.161616	0.153846	0.271845
15	28228644	G	A	rs12910433	OCA2	single nucleotide variant	NM_000275.2(OCA2):c.1365-15C>T	Oculocutaneous albinism;not specified	Estonians(Estonian_Biocentre)	0.388739	0.577928	Benign	A	0.720833	0.7057	0.626719	0.703229	0.177336	0.371299	0.592949	0.144574	0.104243	0.0657895	0.156081	0.742302	0.713684	0.635784	0.785102	0.356284	0.594493	0.179171	0.412322	0.617241	0.155084	0.745826	0.719667	0.669444	0.125	0.213115	0.337209	0.204301	0.707071	0.092233	0.171429	0.510638	0.121212	0.782828	0.71978	0.334951
16	78458750	G	A	rs4130513	WWOX	single nucleotide variant	NM_016373.3(WWOX):c.606-17G>A	not specified	YRI(1KG_phase3)	0.223127	0.577799	Benign	A	0.0619835	0.0666842	0.0794417	0.0716749	0.613591	0.117093	0.130794	0.186137	0.156888	0.0970149	0.194952	0.090542	0.0721044	0.084021	0.0769938	0.148049	0.115995	0.603552	0.117925	0.124138	0.186615	0.0960875	0.0735237	0.14733	0.677083	0.622951	0.186047	0.236559	0.0454545	0.218447	0.180952	0.111702	0.722222	0.0858586	0.0659341	0.169903
2	179406003	C	A	rs3731750	TTN	single nucleotide variant	NM_133378.4(TTN):c.90091+6G>T	Dilated Cardiomyopathy, Dominant;Distal myopathy Markesbery-Griggs type;Hereditary myopathy with early respiratory failure;Hypertrophic cardiomyopathy;Limb-Girdle Muscular Dystrophy, Recessive;Myopathy, early-onset, with fatal cardiomyopathy;not specified	Papuan(HGDP)	0.422231	0.577769	Likely_benign	A	0.238889	0.214547	0.238129	0.213631	0.537356	0.413388	0.259971	0.702358	0.639816	0.693878	0.715354	0.274953	0.215426	0.227913	0.213833	0.495165	0.302442	0.531365	0.408983	0.232639	0.69112	0.269031	0.22742	0.297422	0.546875	0.508197	0.633721	0.83871	0.20202	0.650485	0.714286	0.388298	0.631313	0.308081	0.230769	0.495146
3	10091035	T	C	rs10222446	FANCD2	single nucleotide variant	NM_001018115.2(FANCD2):c.1414-23T>C	not specified	MSL(1KG_phase3)	0.339953	0.577694	Benign	C	0.228395	0.214887	0.153882	0.178097	0.758698	0.157549	0.252292	0.0913773	0.105853	0.031746	0.0883343	0.121411	0.182249	0.160661	0.147893	0.125894	0.2	0.77042	0.317188	0.334951	0.197635	0.304938	0.332601	0.329208	0.8125	0.786885	0.226744	0.252688	0.323232	0.237864	0.304762	0.31383	0.878788	0.30303	0.362637	0.257282
22	41914593	C	T	rs203319	ACO2	single nucleotide variant	NM_001098.2(ACO2):c.1032+17C>T	not specified	Maya(HuOrigin);Pima(HuOrigin);Taa_West(HuOrigin);Xuun(HuOrigin)	0.422387	0.577613	Likely_benign	T	0.198347	0.204942	0.240261	0.208509	0.550905	0.656809	0.317226	0.573782	0.430854	0.368421	0.613784	0.258779	0.206316	0.203371	0.191366	0.381603	0.322923	0.549665	0.584906	0.3	0.578023	0.256062	0.200653	0.266605	0.53125	0.491803	0.517442	0.682796	0.227273	0.567961	0.619048	0.473404	0.494949	0.217172	0.241758	0.402913
4	72433545	A	C	rs1062677	SLC4A4	single nucleotide variant	NM_003759.3(SLC4A4):c.*77A>C	Renal tubular acidosis, proximal, with ocular abnormalities and mental retardation	Karitiana(HGDP)	0.173199	0.576801	Benign	C	0.149533	0.206039	0.144089	0.18472	0.123714	0.38339	0.120785	0.104678	0.0797788	0.0357143	0.112129	0.141528	0.193752	0.141811	0.191881	0.207959	0.189702	0.131379	0.345606	0.110345	0.0922266	0.138617	0.186694	0.158041	0.125	0.114754	0.226744	0.177419	0.252525	0.135922	0.0809524	0.281915	0.0959596	0.141414	0.175824	0.184466
1	197070776	C	T	rs10922162	ASPM	single nucleotide variant	NM_018136.4(ASPM):c.7605G>A (p.Val2535=)	Primary Microcephaly, Recessive;Primary autosomal recessive microcephaly 5;not specified	BTQ(AAGC)	0.340038	0.576629	Benign	T	0.180672	0.160471	0.155052	0.15968	0.0394867	0.464778	0.183387	0.705536	0.696665	0.638158	0.70857	0.24831	0.156761	0.154798	0.148128	0.276652	0.217348	0.0402114	0.407801	0.158621	0.713351	0.246398	0.165757	0.213235	0.0260417	0.0737705	0.418605	0.66129	0.151515	0.631068	0.714286	0.297872	0.010101	0.257576	0.164835	0.305825
16	2140454	T	C	rs3087632	PKD1	single nucleotide variant	NM_001009944.2(PKD1):c.12276A>G (p.Ala4092=)	Polycystic kidney disease, adult type;not specified	GWD(1KG_phase3)	0.197907	0.576429	Benign	C	0.207207	0.179548	0.219738	0.182639	0.640476	0.125611	0.254966	0.000218794	0	0	0.00027894	0.22166	0.183108	0.197628	0.171482	0.0965809	0.195479	0.648225	0.14033	0.255172	0.000642674	0.223374	0.175648	0.209559	0.708333	0.532787	0.0581395	0	0.176768	0	0	0.260638	0.737374	0.247475	0.153846	0.0970874
3	14193889	C	T	rs2227998	XPC	single nucleotide variant	NM_004628.4(XPC):c.2061G>A (p.Arg687=)	Xeroderma pigmentosum;not specified	Hadza(HuOrigin)	0.241754	0.576427	Benign	T	0.3125	0.267184	0.224069	0.257282	0.30499	0.312086	0.234478	0.0394309	0.052396	0.00746269	0.0362017	0.228691	0.258655	0.225965	0.264287	0.288574	0.239712	0.300069	0.3026	0.248276	0.0358974	0.226671	0.261206	0.239411	0.395833	0.262295	0.313953	0.0483871	0.222222	0.0436893	0.0238095	0.260638	0.318182	0.217172	0.258242	0.218447
7	114333664	C	T	rs1058335	FOXP2	single nucleotide variant	NM_014491.3(FOXP2):c.*3683C>T	Speech-language disorder 1	BTQ(AAGC)	0.216117	0.57555	Benign	T	0.261538	0.199465	0.206271	0.204938	0.034299	0.279046	0.211563	0.409135	0.349785	0.2	0.422493	0.262395	0.201695	0.237288	0.2	0.19836	0.23884	0.0384615	0.276596	0.237931	0.414304	0.269342	0.210035	0.224074	0.0416667	0.0819672	0.203488	0.446237	0.176768	0.378641	0.457143	0.170213	0	0.242424	0.208791	0.247573
21	43905887	C	T	rs2839536	RSPH1	single nucleotide variant	NM_080860.3(RSPH1):c.393G>A (p.Ala131=)	not specified	PEL(1KG_phase3)	0.289417	0.575289	Benign	T	0.380165	0.412007	0.352557	0.383568	0.124569	0.672642	0.343651	0.193487	0.175223	0.144737	0.198835	0.38856	0.386797	0.333833	0.370437	0.291776	0.386445	0.130605	0.591017	0.348276	0.192407	0.380184	0.396776	0.378676	0.109375	0.221311	0.30814	0.193548	0.434343	0.169903	0.2	0.5	0.0454545	0.333333	0.461538	0.383495
5	13717471	T	C	rs2277046	DNAH5	single nucleotide variant	NM_001369.2(DNAH5):c.12658A>G (p.Thr4220Ala)	Ciliary dyskinesia;not specified	Dolgans(Estonian_Biocentre)	0.197539	0.575188	Likely_benign	C	0.1	0.0831508	0.0523834	0.0843545	0.0208615	0.30672	0.0691711	0.386775	0.485286	0.421053	0.360747	0.138387	0.0834246	0.0751315	0.0971124	0.179466	0.12688	0.0249253	0.265957	0.0517241	0.357143	0.139241	0.09375	0.123389	0.0104167	0.0491803	0.203488	0.225806	0.0757576	0.441748	0.380952	0.180851	0	0.126263	0.0604396	0.203883
7	75616105	G	A	rs17685	POR	single nucleotide variant	NM_000941.2(POR):c.*306G>A	Antley-Bixler syndrome with genital anomalies and disordered steroidogenesis	BTQ(AAGC)	0.299926	0.575074	Likely_benign	A	NA	NA	NA	NA	NA	NA	NA	NA	NA	NA	NA	NA	NA	NA	NA	NA	NA	0.179039	0.192217	0.227586	0.358612	0.395737	0.28722	0.306066	0.171875	0.229508	0.325581	0.376344	0.292929	0.325243	0.366667	0.223404	0.19697	0.308081	0.252747	0.34466
2	73677833	A	G	rs6546836	ALMS1	single nucleotide variant	NM_015120.4(ALMS1):c.4182A>G (p.Gln1394=)	not specified	ESN(1KG_phase3)	0.253293	0.57499	Benign	G	0.2625	0.239928	0.225852	0.235931	0.713141	0.403317	0.150964	0.00606566	0.012336	0.0223881	0.00420647	0.233043	0.236058	0.253383	0.232432	0.160207	0.236694	0.704551	0.375297	0.152778	0.00452196	0.239055	0.236097	0.262037	0.703125	0.721311	0.127907	0.00537634	0.247475	0.00485437	0.00952381	0.351064	0.828283	0.212121	0.203297	0.179612
22	50302850	A	G	rs4075331	ALG12	single nucleotide variant	NM_024105.3(ALG12):c.768+42T>C	not specified	LWK(1KG_phase3)	0.308877	0.574962	Benign	G	0.2375	0.201887	0.218935	0.209308	0.74176	0.152248	0.305125	0.133584	0.129825	0.166667	0.134226	0.165541	0.205191	0.200826	0.199724	0.428296	0.233497	0.731777	0.198113	0.303448	0.131783	0.176182	0.207487	0.240331	0.78125	0.663934	0.383721	0.16129	0.247475	0.150485	0.204762	0.223404	0.868687	0.166667	0.197802	0.378641
2	179395958	T	C	rs3813250	TTN	single nucleotide variant	NM_133378.4(TTN):c.97680A>G (p.Ala32560=)	Cardiovascular phenotype;Dilated Cardiomyopathy, Dominant;Distal myopathy Markesbery-Griggs type;Hereditary myopathy with early respiratory failure;Hypertrophic cardiomyopathy;Limb-Girdle Muscular Dystrophy, Recessive;Myopathy, early-onset, with fatal cardiomyopathy;not specified	Papuan(HGDP)	0.425134	0.574866	Likely_benign	C	0.231405	0.219664	0.24526	0.225769	0.544762	0.42709	0.281213	0.70257	0.651912	0.679104	0.716588	0.277871	0.225941	0.234586	0.226866	0.514805	0.307476	0.539428	0.411557	0.234483	0.68961	0.269585	0.229091	0.302583	0.546875	0.52459	0.633721	0.83871	0.207071	0.645631	0.709524	0.388298	0.631313	0.308081	0.236264	0.495146
3	46902129	T	G	rs2227294	MYL3	single nucleotide variant	NM_000258.2(MYL3):c.307+37A>C	not specified	MSL(1KG_phase3)	0.390304	0.574402	Benign	G	0.0913043	0.115383	0.135789	0.119963	0.785059	0.323123	0.230608	0.379256	0.401786	0.330882	0.373726	0.137658	0.119718	0.132931	0.118145	0.399332	0.199076	0.782453	0.311321	0.213793	0.369537	0.136809	0.119255	0.198895	0.807292	0.745902	0.424419	0.33871	0.146465	0.407767	0.409524	0.276596	0.939394	0.151515	0.10989	0.446602
2	182401752	G	A	rs1047307	CERKL	single nucleotide variant	NM_201548.4(CERKL):c.*1159C>T	Retinitis Pigmentosa, Recessive	Onge(HuOrigin)	0.425736	0.574264	Likely_benign	A	0.365079	0.352667	0.396022	0.367719	0.230949	0.355935	0.410981	0.486281	0.460879	0.5	0.491912	0.276891	0.358153	0.349057	0.348401	0.623802	0.38886	0.222554	0.366348	0.444828	0.490347	0.289914	0.34961	0.349908	0.177083	0.254098	0.604651	0.478495	0.328283	0.466019	0.442857	0.25	0.176768	0.267677	0.269231	0.684466
2	179427536	T	C	rs3829746	TTN	single nucleotide variant	NM_133378.4(TTN):c.75619A>G (p.Ile25207Val)	Cardiovascular phenotype;Dilated Cardiomyopathy, Dominant;Distal myopathy Markesbery-Griggs type;Hereditary myopathy with early respiratory failure;Hypertrophic cardiomyopathy;Limb-Girdle Muscular Dystrophy, Recessive;Myopathy, early-onset, with fatal cardiomyopathy;not specified	Papuan(HGDP)	0.425771	0.574229	Likely_benign	C	0.233333	0.21997	0.243955	0.226386	0.544712	0.42604	0.28125	0.70371	0.653782	0.669231	0.717065	0.277336	0.22593	0.235671	0.226193	0.51526	0.308283	0.539443	0.410377	0.234483	0.693108	0.269142	0.229102	0.302583	0.546875	0.508197	0.633721	0.83871	0.207071	0.65534	0.714286	0.388298	0.636364	0.308081	0.236264	0.495146
1	197102745	A	G	rs4915344	ASPM	single nucleotide variant	NM_018136.4(ASPM):c.2174-20T>C	Primary autosomal recessive microcephaly 5;not specified	BTQ(AAGC)	0.343204	0.573463	Benign	G	0.176471	0.160015	0.155133	0.159828	0.0421307	0.463933	0.182616	0.70526	0.697065	0.635135	0.708159	0.249164	0.156626	0.15503	0.148027	0.281461	0.218361	0.0432637	0.404028	0.158621	0.710696	0.24611	0.165715	0.214154	0.0260417	0.0819672	0.418605	0.66129	0.151515	0.635922	0.714286	0.297872	0.020202	0.257576	0.164835	0.305825
2	170099895	A	C	rs2075255	LRP2	single nucleotide variant	NM_004525.2(LRP2):c.3550+18T>G	not specified	BTQ(AAGC)	0.343236	0.57343	Benign	C	0.446281	0.456181	0.508565	0.482251	0.737814	0.678296	0.571344	0.483885	0.471144	0.440789	0.487712	0.390139	0.468353	0.534134	0.447326	0.748888	0.51126	0.73093	0.667062	0.555172	0.485602	0.386939	0.467185	0.48244	0.0833333	0.057377	0	0.0268817	0.010101	0.00485437	0.0238095	0.00531915	0.0656566	0	0.00549451	0
12	12871099	T	G	rs2066827	CDKN1B	single nucleotide variant	NM_004064.4(CDKN1B):c.326T>G (p.Val109Gly)	Hereditary cancer-predisposing syndrome;Multiple endocrine neoplasia;not specified	BantuKenya(HGDP)	0.290684	0.572952	Likely_benign	G	0.213675	0.238573	0.277309	0.24146	0.726231	0.153072	0.259872	0.038327	0.0290728	0.0666667	0.0405518	0.252879	0.248061	0.254393	0.257886	0.3169	0.271617	0.725299	0.201651	0.255172	0.0444015	0.236751	0.231828	0.251845	0.796875	0.704918	0.255814	0.0591398	0.232323	0.0485437	0.0333333	0.239362	0.813131	0.257576	0.236264	0.315534
19	38996066	A	G	rs2915953	RYR1	single nucleotide variant	NM_000540.2(RYR1):c.8400+28A>G	not provided;not specified	Papuan(HuOrigin)	0.392796	0.57149	Benign	G	0.227679	0.244673	0.266601	0.249004	0.419467	0.381963	0.240676	0.327306	0.300428	0.225352	0.335791	0.290516	0.244645	0.245726	0.222355	0.451545	0.301688	0.438867	0.347156	0.234483	0.381443	0.289988	0.247954	0.292435	0.484375	0.442623	0.401163	0.403226	0.247475	0.305825	0.395238	0.398936	0.494949	0.30303	0.318681	0.514563
13	20715801	C	A	rs1886176	GJA3	single nucleotide variant	NM_021954.3(GJA3):c.*319G>T	Zonular Pulverulent Cataract	Papuan(HGDP)	0.252077	0.571452	Benign	A	NA	NA	NA	NA	NA	NA	NA	NA	NA	NA	NA	NA	NA	NA	NA	NA	NA	0.211712	0.163121	0.265517	0.360825	0.224108	0.260728	0.227695	0.192708	0.286885	0.255814	0.430108	0.292929	0.305825	0.361905	0.218085	0.156566	0.277778	0.197802	0.31068
19	14030689	T	C	rs10410239	CC2D1A	single nucleotide variant	NM_017721.4(CC2D1A):c.1281T>C (p.Gly427=)	Neurodevelopmental;not specified	YRI(1KG_phase3)	0.350082	0.571214	Likely_benign	C	0.183333	0.206345	0.202508	0.209965	0.755544	0.366514	0.181321	0.299131	0.261555	0.268657	0.309643	0.168183	0.207361	0.202703	0.208745	0.267545	0.255706	0.749133	0.36643	0.174825	0.326797	0.163112	0.199358	0.246269	0.75	0.721311	0.331395	0.301075	0.257576	0.281553	0.333333	0.303191	0.909091	0.161616	0.241758	0.291262
21	47575372	C	T	rs2277820	FTCD	single nucleotide variant	NM_006657.2(FTCD):c.54+12G>A	GLUTAMATE FORMIMINOTRANSFERASE DEFICIENCY;not specified	Karitiana(HGDP)	0.429002	0.570998	Benign	T	0.273913	0.281074	0.274622	0.28192	0.107697	0.606257	0.252802	0.822817	0.825996	0.736842	0.822882	0.385757	0.276655	0.292646	0.262612	0.45218	0.338429	0.11489	0.528302	0.255172	0.818123	0.385435	0.292911	0.325	0.0729167	0.163934	0.482558	0.747312	0.313131	0.830097	0.809524	0.356383	0.106061	0.409091	0.241758	0.427184
16	10989219	C	G	rs2229317	CIITA	single nucleotide variant	NM_000246.3(CIITA):c.133C>G (p.Leu45Val)	Bare lymphocyte syndrome 2	PEL(1KG_phase3)	0.152567	0.570962	Benign	G	0.0208333	0.011019	0.00991132	0.0126517	0.0649766	0.485429	0.00833499	0.334585	0.369303	0.296053	0.325791	0.0236443	0.012205	0.0205993	0.0136635	0.0689227	0.0731986	0.0682602	0.409198	0.0103448	0.338689	0.0235903	0.014206	0.0643382	0.0833333	0.057377	0.0988372	0.27957	0	0.383495	0.347619	0.244681	0.0555556	0.0151515	0.00549451	0.038835
6	152651759	C	G	rs3734365	SYNE1	single nucleotide variant	NM_033071.3(SYNE1):c.13848G>C (p.Leu4616=)	Cerebellar ataxia;Emery-Dreifuss muscular dystrophy;not specified	BTQ(AAGC)	0.179073	0.570927	Benign	G	0.0913043	0.0596573	0.0618421	0.0622581	0.0399876	0.0645787	0.0476048	0.425298	0.400839	0.450704	0.431552	0.0707823	0.0601349	0.0696629	0.0564164	0.132164	0.0851657	0.0386734	0.0613208	0.0482759	0.447097	0.0716753	0.0644283	0.0662983	0.0625	0.057377	0.127907	0.548387	0.0606061	0.475728	0.428571	0.0585106	0.0353535	0.0606061	0.0714286	0.18932
3	189587091	A	G	rs6789961	TP63	single nucleotide variant	NM_003722.4(TP63):c.1130-22A>G	not specified	Nama(HuOrigin)	0.273075	0.570675	Benign	G	0.181818	0.219708	0.259489	0.219428	0.593227	0.134761	0.264811	0.156093	0.163757	0.125	0.154412	0.209852	0.218557	0.250563	0.194794	0.185196	0.231799	0.592469	0.179669	0.293103	0.15276	0.203395	0.207781	0.225599	0.635417	0.516393	0.186047	0.150538	0.191919	0.160194	0.147619	0.234043	0.646465	0.232323	0.164835	0.165049
16	19547503	C	T	rs3751821	CCP110	single nucleotide variant	NM_001199022.2(CCP110):c.512C>T (p.Pro171Leu)	not specified	Karitiana(HGDP)	0.215053	0.570661	Benign	T	0.05	0.0719165	0.0852916	0.070418	0.298326	0.289393	0.0555776	0.417962	0.41802	0.401316	0.418123	0.0694072	0.0695317	0.0858965	0.0562146	0.125727	0.112671	0.300253	0.247045	0.0586207	0.412031	0.0734447	0.0727167	0.11489	0.328125	0.303279	0.145349	0.387097	0.0656566	0.349515	0.395238	0.271277	0.348485	0.0656566	0.0549451	0.145631
14	94849201	C	T	rs709932	SERPINA1	single nucleotide variant	NM_001127701.1(SERPINA1):c.374G>A (p.Arg125His)	Alpha-1-antitrypsin deficiency;PI M2;PI M4;not specified	Papuan(HGDP)	0.164659	0.570635	Likely_benign	T	0.157025	0.158892	0.202244	0.167539	0.0331692	0.10786	0.162103	0.206647	0.177859	0.197368	0.214355	0.120621	0.16403	0.187781	0.148993	0.268977	0.166123	0.0362718	0.13948	0.155172	0.204108	0.128596	0.156368	0.149171	0.0416667	0.057377	0.331395	0.247312	0.146465	0.228155	0.17619	0.101064	0	0.106061	0.159341	0.325243
6	132211763	G	A	rs1044548	ENPP1	single nucleotide variant	NM_006208.3(ENPP1):c.*112G>A	Arterial calcification of infancy;Hypophosphatemic Rickets, Recessive	MbutiPygmy(HGDP)	0.083305	0.570541	Benign	A	NA	NA	NA	NA	NA	NA	NA	NA	NA	NA	NA	NA	NA	NA	NA	NA	NA	0.296203	0.0648585	0.0275862	0.000641026	0.0149856	0.0433316	0.0652574	0.328125	0.295082	0.0348837	0	0.0606061	0	0	0.0744681	0.247475	0.0151515	0.043956	0.0242718
2	149270710	A	G	rs16828708	MBD5	single nucleotide variant	NM_018328.4(MBD5):c.*200A>G	Intellectual Disability, Dominant	Karitiana(HGDP)	0.429584	0.570416	Likely_benign	G	NA	NA	NA	NA	NA	NA	NA	NA	NA	NA	NA	NA	NA	NA	NA	NA	NA	0.255806	0.488152	0.293103	0.833333	0.193836	0.256913	0.274816	0.239583	0.295082	0.552326	0.758065	0.287879	0.830097	0.847619	0.484043	0.313131	0.19697	0.214286	0.475728
7	21779278	A	G	rs9639393	DNAH11	single nucleotide variant	NM_001277115.1(DNAH11):c.7901A>G (p.Asn2634Ser)	Ciliary dyskinesia;not specified	Papuan(HGDP)	0.400322	0.570266	Benign	G	0.65	0.646809	0.619575	0.641641	0.261457	0.464682	0.531188	0.0626673	0.0782974	0.141791	0.0576593	0.641231	0.639137	0.640496	0.632193	0.550885	0.565254	0.273922	0.454976	0.537931	0.060567	0.647008	0.63921	0.565498	0.197917	0.319672	0.418605	0.0537634	0.666667	0.0728155	0.0761905	0.595745	0.207071	0.626263	0.60989	0.485437
3	58413662	G	A	rs7230	PDHB	single nucleotide variant	NM_000925.3(PDHB):c.*99C>T	Pyruvate dehydrogenase complex deficiency	BTQ(AAGC)	0.346668	0.569999	Benign	A	0.328829	0.244527	0.242882	0.263663	0.0716242	0.33443	0.157617	0.816637	0.791419	0.775	0.823149	0.324695	0.254378	0.283879	0.285423	0.393162	0.285097	0.075977	0.31872	0.141379	0.82732	0.305476	0.259276	0.277574	0.0520833	0.0737705	0.563953	0.849462	0.29798	0.800971	0.795238	0.329787	0.040404	0.29798	0.214286	0.398058
22	50301476	T	C	rs8135963	ALG12	single nucleotide variant	NM_024105.3(ALG12):c.885A>G (p.Ala295=)	Congenital disorder of glycosylation;not specified	LWK(HapMap)	0.325528	0.569927	Benign	C	0.2375	0.20209	0.218908	0.208931	0.741781	0.152261	0.305164	0.134096	0.128624	0.171053	0.135146	0.164951	0.205148	0.199775	0.199801	0.426439	0.233127	0.731221	0.199292	0.303448	0.133676	0.176081	0.207499	0.239852	0.78125	0.663934	0.383721	0.16129	0.247475	0.150485	0.214286	0.223404	0.868687	0.166667	0.197802	0.368932
2	179454394	A	G	rs1560221	TTN	single nucleotide variant	NM_133378.4(TTN):c.54354T>C (p.Tyr18118=)	Cardiovascular phenotype;Dilated Cardiomyopathy, Dominant;Distal myopathy Markesbery-Griggs type;Hereditary myopathy with early respiratory failure;Hypertrophic cardiomyopathy;Limb-Girdle Muscular Dystrophy, Recessive;Myopathy, early-onset, with fatal cardiomyopathy;not specified	Papuan(HGDP)	0.430424	0.569576	Likely_benign	G	0.231405	0.220447	0.247216	0.227033	0.542636	0.430162	0.287625	0.711034	0.660032	0.679104	0.725043	0.278227	0.226867	0.23985	0.226676	0.520073	0.30988	0.536858	0.411137	0.241379	0.701581	0.268987	0.229686	0.302583	0.552083	0.508197	0.651163	0.844086	0.212121	0.660194	0.733333	0.393617	0.636364	0.308081	0.236264	0.509709
2	98994134	A	G	rs2279859	CNGA3	single nucleotide variant	NM_001298.2(CNGA3):c.102-16A>G	not specified	Hadza(HuOrigin)	0.089748	0.569343	Benign	G	0.110169	0.0857136	0.11079	0.091529	0.0465161	0.0489354	0.15979	0.146046	0.134179	0.166667	0.149016	0.0744065	0.0879381	0.120565	0.0741229	0.0606869	0.0955339	0.0488281	0.0437352	0.189655	0.147172	0.0745109	0.0857551	0.0810313	0.046875	0.0655738	0.0465116	0.107527	0.0555556	0.0970874	0.185714	0.0478723	0.040404	0.0757576	0.0549451	0.0291262
15	91525197	C	T	rs2301826	PRC1	single nucleotide variant	NM_003981.3(PRC1):c.282G>A (p.Thr94=)	Familial cancer of breast	MbutiPygmy(HGDP)	0.392251	0.569287	Uncertain_significance	T	0.235537	0.198025	0.207811	0.206462	0.699631	0.369675	0.241167	0.500652	0.501572	0.414474	0.501317	0.228021	0.201878	0.229963	0.19687	0.366431	0.264754	0.686349	0.347156	0.210345	0.50129	0.213545	0.216649	0.296875	0.723958	0.680328	0.383721	0.494624	0.191919	0.553398	0.514286	0.271277	0.787879	0.247475	0.197802	0.349515
3	124466520	C	T	rs10934685	UMPS	single nucleotide variant	NM_000373.3(UMPS):c.*3589C>T	Orotic aciduria	Onge(HuOrigin)	0.248989	0.569193	Benign	T	0.284615	0.272458	0.354714	0.294865	0.184358	0.292454	0.403656	0.377876	0.283191	0.5	0.39841	0.220758	0.28184	0.290323	0.278068	0.185193	0.306864	0.176356	0.274764	0.431034	0.369677	0.22251	0.287513	0.282689	0.166667	0.139344	0.232558	0.397849	0.343434	0.398058	0.371429	0.31383	0.121212	0.242424	0.269231	0.165049
19	38995975	G	A	rs2915952	RYR1	single nucleotide variant	NM_000540.2(RYR1):c.8337G>A (p.Glu2779=)	Malignant hyperthermia susceptibility;Multiminicore Disease;Myopathy, Central Core;Neuromuscular disease, congenital, with uniform type 1 fiber;not provided;not specified	Papuan(HuOrigin)	0.395183	0.569102	Benign	A	0.228448	0.246338	0.27748	0.255028	0.433914	0.390097	0.241258	0.338237	0.31756	0.24	0.344753	0.29403	0.252999	0.261977	0.250098	0.455691	0.302951	0.438076	0.347877	0.234483	0.381105	0.290155	0.247368	0.291897	0.484375	0.442623	0.401163	0.403226	0.247475	0.305825	0.395238	0.398936	0.494949	0.30303	0.318681	0.514563
14	70477508	C	T	rs3825739	SMOC1	single nucleotide variant	NM_001034852.2(SMOC1):c.702C>T (p.Ala234=)	not specified	Karitiana(HGDP)	0.216785	0.56893	Benign	T	0.247934	0.192875	0.13585	0.179125	0.0390625	0.342055	0.148244	0.41219	0.44264	0.368421	0.40459	0.170193	0.181124	0.156414	0.186347	0.201313	0.187785	0.0408819	0.319575	0.117241	0.398196	0.1729	0.190325	0.176471	0.015625	0.0245902	0.226744	0.349462	0.171717	0.432039	0.442857	0.276596	0	0.20202	0.164835	0.237864
3	37030175	C	A	rs9311149	MLH1	single nucleotide variant	NM_000249.3(MLH1):c.-4864C>A	Lynch syndrome	Xuun(HuOrigin)	0.315689	0.568927	Benign	A	NA	NA	NA	NA	NA	NA	NA	NA	NA	NA	NA	NA	NA	NA	NA	NA	NA	0.621226	0.408983	0.465517	0.0752896	0.449221	0.514857	0.478664	0.604167	0.631148	0.215116	0.0645161	0.59596	0.0825243	0.0666667	0.5	0.550505	0.414141	0.450549	0.252427
2	179583496	T	G	rs16866465	TTN	single nucleotide variant	TTN:c.24431A>C (p.Glu8144Ala)	Cardiovascular phenotype;Dilated Cardiomyopathy, Dominant;Distal myopathy Markesbery-Griggs type;Hereditary myopathy with early respiratory failure;Hypertrophic cardiomyopathy;Limb-Girdle Muscular Dystrophy, Recessive;Myopathy, early-onset, with fatal cardiomyopathy;not provided;not specified	Papuan(HuOrigin)	0.21687	0.568845	Likely_benign	G	0.144628	0.155676	0.166608	0.151507	0.152132	0.173423	0.12306	0.430983	0.400948	0.440299	0.439024	0.0959413	0.150245	0.147633	0.13314	0.222538	0.164733	0.152369	0.187943	0.1	0.424419	0.0857307	0.149838	0.144177	0.15625	0.172131	0.25	0.510753	0.131313	0.393204	0.461905	0.180851	0.151515	0.0909091	0.208791	0.218447
19	38997214	T	G	rs2960345	RYR1	single nucleotide variant	NM_000540.2(RYR1):c.8692+28T>G	not provided;not specified	Papuan(HuOrigin)	0.395629	0.568657	Benign	G	0.247748	0.246846	0.285689	0.257602	0.438026	0.392643	0.242712	0.340515	0.318468	0.246667	0.347388	0.295243	0.256461	0.262162	0.256811	0.458161	0.304987	0.437486	0.349057	0.234483	0.376943	0.290035	0.247594	0.291897	0.484375	0.442623	0.401163	0.403226	0.247475	0.305825	0.395238	0.398936	0.494949	0.30303	0.318681	0.514563
2	48914615	C	G	rs62137532	LHCGR	single nucleotide variant	NM_000233.3(LHCGR):c.*221G>C	Gonadotropin-independent familial sexual precocity;Hypergonadotropic hypogonadism;Leydig cell agenesis	BTQ(AAGC)	0.181389	0.568611	Benign	G	NA	NA	NA	NA	NA	NA	NA	NA	NA	NA	NA	NA	NA	NA	NA	NA	NA	0.1273	0.199764	0.137931	0.0641026	0.244233	0.229805	0.21547	0.130208	0.172131	0.27907	0.0806452	0.242424	0.0631068	0.0809524	0.196809	0.0808081	0.242424	0.192308	0.23301
7	75544455	A	C	rs3823884	POR	single nucleotide variant	NM_000941.2(POR):c.-47A>C	Antley-Bixler syndrome with genital anomalies and disordered steroidogenesis	MSL(1KG_phase3)	0.402707	0.567881	Benign	C	NA	NA	NA	NA	NA	NA	NA	NA	NA	NA	NA	NA	NA	NA	NA	NA	NA	0.829758	0.405437	0.217241	0.280645	0.248848	0.271633	0.334871	0.875	0.918033	0.348837	0.306452	0.242424	0.31068	0.233333	0.319149	0.959596	0.262626	0.324176	0.393204
1	100656494	A	G	rs11166413	DBT	single nucleotide variant	NM_001918.3(DBT):c.*5317T>C	Maple syrup urine disease	Papuan(HGDP)	0.314814	0.567539	Benign	G	NA	NA	NA	NA	NA	NA	NA	NA	NA	NA	NA	NA	NA	NA	NA	NA	NA	0.0915461	0.420804	0.358621	0.214653	0.421947	0.410042	0.387454	0.0677083	0.106557	0.27907	0.274194	0.414141	0.242718	0.257143	0.37766	0.0151515	0.424242	0.379121	0.325243
14	102514227	T	C	rs13749	DYNC1H1	single nucleotide variant	NM_001376.4(DYNC1H1):c.13080T>C (p.Thr4360=)	Charcot-Marie-Tooth disease, type 2;Intellectual Disability, Dominant;Neurodevelopmental;Spinocerebellar Ataxia, Dominant;not specified	MbutiPygmy(HGDP)	0.278649	0.567504	Likely_benign	C	0.0867769	0.161487	0.20842	0.163887	0.596782	0.248858	0.24722	0.287836	0.290204	0.25	0.287608	0.123938	0.163431	0.177528	0.145503	0.254311	0.21312	0.593445	0.274232	0.268966	0.276554	0.122543	0.150822	0.201852	0.625	0.614754	0.273256	0.317204	0.121212	0.291262	0.32381	0.244681	0.636364	0.131313	0.115385	0.281553
8	27328511	G	A	rs2472553	CHRNA2	single nucleotide variant	NM_000742.3(CHRNA2):c.65C>T (p.Thr22Ile)	Nocturnal frontal lobe epilepsy;Seizures;not specified	Evenkis(Estonian_Biocentre)	0.199205	0.567462	Benign	A	0.140496	0.131686	0.107435	0.132404	0.17424	0.194332	0.0654809	0.449624	0.535097	0.5	0.426417	0.166158	0.131233	0.114779	0.141189	0.12696	0.140783	0.165748	0.17217	0.0655172	0.445019	0.170507	0.139379	0.170037	0.130208	0.155738	0.180233	0.263441	0.151515	0.495146	0.5	0.234043	0.227273	0.191919	0.126374	0.199029
1	6526183	G	A	rs3007417	PLEKHG5	single nucleotide variant	NM_020631.4(PLEKHG5):c.*1440C>T	Distal spinal muscular atrophy	GWD(1KG_phase3)	0.127899	0.566792	Benign	A	0.0652174	0.0572999	0.108439	0.0674098	0.502017	0.0509572	0.0938691	0.00042517	0.000814332	0	0.000288517	0.0627907	0.0702497	0.0626959	0.0784615	0.0790761	0.081323	0.493192	0.0805687	0.113793	0	0.0821284	0.0668498	0.103896	0.510417	0.401639	0.0697674	0	0.0505051	0	0	0.106383	0.590909	0.0656566	0.0494505	0.165049
5	89938434	G	T	rs1344030	ADGRV1	single nucleotide variant	NM_032119.3(ADGRV1):c.2241-19G>T	not specified	Papuan(HGDP)	0.227515	0.566603	Benign	T	0.182203	0.146176	0.155966	0.158248	0.201229	0.140991	0.222048	0.403651	0.37369	0.310345	0.412855	0.19146	0.153225	0.180408	0.154216	0.225188	0.17451	0.207606	0.1513	0.213793	0.409149	0.195164	0.159407	0.163904	0.239583	0.245902	0.261628	0.483871	0.151515	0.373786	0.461905	0.154255	0.272727	0.176768	0.131868	0.179612
1	158626378	C	T	rs857691	SPTA1	single nucleotide variant	NM_003126.3(SPTA1):c.2874G>A (p.Leu958=)	Elliptocytosis;Hereditary pyropoikilocytosis;Spherocytosis, Recessive;not specified	BiakaPygmy(HGDP)	0.362042	0.56653	Likely_benign	T	0.260331	0.246242	0.256669	0.245785	0.721153	0.371666	0.238332	0.425385	0.398781	0.335821	0.4334	0.334609	0.254234	0.252063	0.276145	0.156753	0.286823	0.707289	0.387707	0.244828	0.450904	0.332853	0.254283	0.28125	0.6875	0.688525	0.19186	0.478495	0.292929	0.349515	0.466667	0.382979	0.792929	0.308081	0.230769	0.184466
19	39002725	A	G	rs2071089	RYR1	single nucleotide variant	NM_000540.2(RYR1):c.9186A>G (p.Pro3062=)	Malignant hyperthermia susceptibility;Multiminicore Disease;Myopathy, Central Core;Neuromuscular disease, congenital, with uniform type 1 fiber;not provided;not specified	Papuan(HuOrigin)	0.397773	0.566513	Benign	G	0.241667	0.24854	0.281003	0.25963	0.437894	0.391035	0.243641	0.339295	0.318825	0.243421	0.345742	0.305581	0.257726	0.262879	0.259767	0.457698	0.305909	0.438235	0.350236	0.234483	0.380491	0.301441	0.251756	0.293519	0.484375	0.442623	0.401163	0.403226	0.247475	0.300971	0.4	0.398936	0.494949	0.313131	0.318681	0.509709
8	133637659	G	A	rs2293979	LRRC6	single nucleotide variant	NM_012472.5(LRRC6):c.695C>T (p.Thr232Ile)	Ciliary dyskinesia;Ciliary dyskinesia, primary, 19;not specified	MbutiPygmy(HGDP)	0.433713	0.566287	Benign	A	0.446281	0.417143	0.400298	0.412133	0.840279	0.240754	0.375348	0.297266	0.220317	0.203947	0.318581	0.336822	0.413309	0.392938	0.41601	0.419221	0.404605	0.830384	0.25237	0.365517	0.288486	0.337464	0.424148	0.425277	0.869792	0.770492	0.406977	0.360215	0.429293	0.296117	0.271429	0.393617	0.90404	0.338384	0.384615	0.378641
9	214864	C	T	rs2236547	DOCK8	single nucleotide variant	NM_203447.3(DOCK8):c.-113C>T	Hyper-IgE syndrome	BTQ(AAGC)	0.308734	0.566266	Benign	T	0.229412	0.188461	0.211766	0.204329	0.286359	0.353058	0.243611	0.388843	0.323434	0.341463	0.407557	0.171617	0.196792	0.228453	0.191591	0.327496	0.241799	0.28464	0.299287	0.203448	0.389392	0.180035	0.20687	0.218401	0.307292	0.360656	0.343023	0.478495	0.20202	0.373786	0.419048	0.287234	0.333333	0.217172	0.225275	0.368932
21	43160723	A	G	rs73369674	RIPK4	single nucleotide variant	NM_020639.2(RIPK4):c.*275T>C	Popliteal pterygium syndrome	Ju_hoan_North(HuOrigin)	0.0703	0.566063	Likely_benign	G	NA	NA	NA	NA	NA	NA	NA	NA	NA	NA	NA	NA	NA	NA	NA	NA	NA	0.172414	0.0106132	0.00344828	0	0	0.000907559	0.0119705	0.15625	0.0983607	0	0	0	0	0	0.037234	0.191919	0	0	0
14	37146475	C	T	rs11847165	PAX9	single nucleotide variant	NM_006194.3(PAX9):c.*818C>T	Selective tooth agenesis	Karitiana(HuOrigin)	0.225824	0.565843	Likely_benign	T	NA	NA	NA	NA	NA	NA	NA	NA	NA	NA	NA	NA	NA	NA	NA	NA	NA	0.205421	0.382143	0.186207	0.205769	0.224337	0.150624	0.197222	0.25	0.188525	0.186047	0.182796	0.166667	0.262136	0.233333	0.265957	0.186869	0.19697	0.126374	0.174757
5	127593732	C	T	rs1050687	FBN2	single nucleotide variant	NM_001999.3(FBN2):c.*1415G>A	Congenital contractural arachnodactyly	LWK(1KG_phase3)	0.176935	0.565489	Benign	T	NA	NA	NA	NA	NA	NA	NA	NA	NA	NA	NA	NA	NA	NA	NA	NA	NA	0.5947	0.102871	0.0763889	0.0320513	0.131143	0.127397	0.145472	0.625	0.508197	0.0581395	0.0645161	0.126263	0.0533981	0.0190476	0.143617	0.732323	0.126263	0.126374	0.165049
18	55314211	T	C	rs1968274	ATP8B1	single nucleotide variant	NM_005603.6(ATP8B1):c.*1509A>G	Familial Intrahepatic Cholestasis	Nganasans(HuOrigin)	0.298416	0.56522	Benign	C	NA	NA	NA	NA	NA	NA	NA	NA	NA	NA	NA	NA	NA	NA	NA	NA	NA	0.28578	0.346698	0.203448	0.444516	0.258362	0.211244	0.236162	0.296875	0.237705	0.238372	0.387097	0.212121	0.495146	0.5	0.228723	0.328283	0.30303	0.214286	0.262136
11	75277757	C	G	rs650241	SERPINH1	single nucleotide variant	NM_001235.3(SERPINH1):c.363C>G (p.Ser121=)	Osteogenesis Imperfecta, Recessive;not specified	BTQ(AAGC)	0.35158	0.565087	Benign	G	0.39899	0.304479	0.300786	0.31806	0.438015	0.374794	0.297713	0.188082	0.204641	0.201754	0.183458	0.375178	0.310632	0.33209	0.313288	0.473412	0.343928	0.439903	0.354953	0.297203	0.183805	0.373921	0.335759	0.347145	0.479167	0.459016	0.52907	0.193548	0.282828	0.179612	0.204762	0.398936	0.439394	0.353535	0.263736	0.533981
12	57442139	A	G	rs2270737	MYO1A	single nucleotide variant	NM_005379.3(MYO1A):c.-20-12T>C	Nonsyndromic Hearing Loss, Dominant	Ju_hoan_North(HuOrigin)	0.139641	0.564904	Likely_benign	G	0.0900901	0.0821161	0.0690582	0.0861788	0.111161	0.0896975	0.0763791	0.187164	0.137783	0.0972222	0.2012	0.102558	0.0842968	0.0710445	0.0935715	0.10057	0.0906814	0.111966	0.121462	0.0896552	0.186856	0.098389	0.0777115	0.0882353	0.140625	0.139344	0.133721	0.263441	0.0858586	0.18932	0.195238	0.12766	0.141414	0.136364	0.126374	0.194175
4	114294308	T	C	rs2293324	ANK2	single nucleotide variant	NM_001148.4(ANK2):c.11673T>C (p.His3891=)	Cardiac arrhythmia, ankyrin B-related;Cardiovascular phenotype;Long QT syndrome;not specified	LWK(1KG_phase3)	0.25339	0.564792	Likely_benign	C	0.15	0.152154	0.191538	0.16154	0.653619	0.177991	0.204649	0.137942	0.155082	0.125	0.133564	0.120427	0.156267	0.190637	0.137696	0.147155	0.199249	0.642332	0.183962	0.168966	0.1491	0.113061	0.161412	0.180147	0.604167	0.606557	0.162791	0.134409	0.171717	0.179612	0.133333	0.164894	0.732323	0.141414	0.120879	0.106796
1	41466803	G	A	rs12718433	CTPS1	single nucleotide variant	NM_001905.4(CTPS1):c.1094+14G>A	not specified	Karitiana(HuOrigin)	0.351917	0.56475	Benign	A	0.356522	0.416415	0.402696	0.42325	0.159674	0.556171	0.407109	0.40628	0.382289	0.434211	0.412924	0.413111	0.419927	0.385932	0.43331	0.332121	0.425846	0.152324	0.546099	0.427586	0.422879	0.417484	0.411035	0.419742	0.151042	0.245902	0.30814	0.435484	0.378788	0.412621	0.452381	0.531915	0.0808081	0.388889	0.478022	0.276699
8	144991176	T	C	rs6558405	PLEC	single nucleotide variant	NM_000445.4(PLEC):c.12894A>G (p.Ser4298=)	not specified	YRI(1KG_phase3)	0.398662	0.564301	Benign	C	0.345455	0.437672	0.470771	0.42959	0.851389	0.290071	0.467424	0.153257	0.163436	0.142857	0.150566	0.41148	0.430379	0.450612	0.401184	0.363336	0.428548	0.840171	0.365248	0.458333	0.143316	0.403347	0.41596	0.434259	0.885417	0.803279	0.372093	0.16129	0.444444	0.160194	0.171429	0.441489	0.959596	0.388889	0.417582	0.349515
10	55955444	T	G	rs4935502	PCDH15	single nucleotide variant	NM_033056.3(PCDH15):c.1304A>C (p.Asp435Ala)	Nonsyndromic Hearing Loss, Recessive;Retinitis pigmentosa-deafness syndrome;not specified	eas_jpn(gnomAD.exomes)	0.357034	0.564018	Likely_benign	G	0.157025	0.133185	0.158082	0.143176	0.129983	0.288525	0.139143	0.842818	0.880115	0.921053	0.832131	0.143794	0.142676	0.164419	0.148266	0.349183	0.208129	0.129655	0.248227	0.141379	0.84126	0.148041	0.137472	0.172794	0.104167	0.147541	0.476744	0.854839	0.106061	0.849515	0.814286	0.239362	0.146465	0.146465	0.126374	0.398058
3	43761637	T	C	rs12491747	ABHD5	single nucleotide variant	NM_016006.5(ABHD5):c.*1613T>C	Triglyceride storage disease with ichthyosis	Khomani(HuOrigin)	0.163581	0.563691	Likely_benign	C	NA	NA	NA	NA	NA	NA	NA	NA	NA	NA	NA	NA	NA	NA	NA	NA	NA	0.141382	0.110849	0.0551724	0.122751	0.0166858	0.0430979	0.0598527	0.197917	0.139344	0.22093	0.0806452	0.040404	0.135922	0.104762	0.0744681	0.166667	0.010101	0.0549451	0.23301
7	140449150	T	C	rs9648696	BRAF	single nucleotide variant	NM_004333.4(BRAF):c.1929A>G (p.Gly643=)	Cardio-facio-cutaneous syndrome;Noonan syndrome;Noonan syndrome with multiple lentigines;Rasopathy;not provided;not specified	MSL(1KG_phase3)	0.271618	0.563676	Benign	C	0.175	0.140635	0.191294	0.152805	0.680478	0.103478	0.209988	0.186535	0.135553	0.0723684	0.20122	0.149172	0.144731	0.197299	0.115662	0.31447	0.183797	0.67504	0.126478	0.206897	0.205392	0.151899	0.140854	0.179228	0.630208	0.655738	0.389535	0.236559	0.131313	0.213592	0.180952	0.180851	0.752525	0.131313	0.131868	0.31068
2	179438866	C	T	rs10164753	TTN	single nucleotide variant	NM_133378.4(TTN):c.64289G>A (p.Arg21430His)	Cardiovascular phenotype;Dilated Cardiomyopathy, Dominant;Distal myopathy Markesbery-Griggs type;Hereditary myopathy with early respiratory failure;Hypertrophic cardiomyopathy;Limb-Girdle Muscular Dystrophy, Recessive;Myopathy, early-onset, with fatal cardiomyopathy;not specified	MbutiPygmy(HGDP)	0.090411	0.563435	Likely_benign	T	0.0495868	0.0313884	0.0320388	0.0324372	0.0778826	0.200191	0.0297927	0.0275978	0.00454303	0	0.0340131	0.0577423	0.0325781	0.0338346	0.0345999	0.181583	0.0637027	0.0818975	0.169834	0.0275862	0.0293734	0.0532221	0.0292364	0.0496324	0.135417	0.057377	0.203488	0.0537634	0.0353535	0.0145631	0.0142857	0.148936	0.10101	0.0808081	0.043956	0.199029
3	123411589	G	A	rs40305	MYLK	single nucleotide variant	NM_053025.3(MYLK):c.3558C>T (p.Thr1186=)	Aortic aneurysm, familial thoracic 7;Cardiovascular phenotype;Thoracic aortic aneurysm and aortic dissection;not provided;not specified	BedouinB(HuOrigin)	0.384731	0.562638	Likely_benign	A	0.75	0.770809	0.77162	0.757153	0.154135	0.449396	0.767322	0.0438825	0.0301205	0.0131579	0.0478502	0.635994	0.760866	0.757871	0.744889	0.479647	0.649658	0.170321	0.51533	0.734483	0.0490323	0.634083	0.743171	0.621521	0.109375	0.147541	0.331395	0.0806452	0.79798	0.0582524	0.0761905	0.574468	0.0252525	0.611111	0.82967	0.533981
21	47545768	G	A	rs1042917	COL6A2	single nucleotide variant	NM_001849.3(COL6A2):c.2039G>A (p.Arg680His)	Collagen VI-related myopathy;Myosclerosis;not provided;not specified	Karitiana(HGDP)	0.437508	0.562492	Benign	A	0.52193	0.497169	0.472295	0.505927	0.240947	0.653376	0.519598	0.439571	0.425092	0.355263	0.444305	0.622733	0.502237	0.454236	0.523925	0.326713	0.516661	0.250635	0.599291	0.562069	0.446104	0.597118	0.520516	0.552778	0.182292	0.295082	0.302326	0.5	0.510101	0.432039	0.385714	0.617021	0.166667	0.636364	0.450549	0.330097
7	138429851	T	C	rs6467797	ATP6V0A4	single nucleotide variant	NM_020632.2(ATP6V0A4):c.1478+17A>G	not specified	BiakaPygmy(HGDP)	0.247233	0.562291	Benign	C	0.239669	0.171657	0.208312	0.185931	0.460364	0.101642	0.192102	0.287843	0.259172	0.210526	0.296242	0.172478	0.178286	0.195131	0.164421	0.132806	0.190228	0.46069	0.121462	0.168966	0.289575	0.173775	0.173699	0.20864	0.453125	0.42623	0.180233	0.360215	0.20202	0.305825	0.3	0.117021	0.434343	0.166667	0.214286	0.092233
11	75282882	G	A	rs585821	SERPINH1	single nucleotide variant	NM_001235.3(SERPINH1):c.1011G>A (p.Leu337=)	Osteogenesis Imperfecta, Recessive;not specified	BTQ(AAGC)	0.354696	0.56197	Benign	A	0.400862	0.303005	0.300174	0.317587	0.445993	0.371156	0.296565	0.185042	0.2022	0.203947	0.180289	0.374259	0.309512	0.333082	0.311364	0.47749	0.342363	0.445865	0.351415	0.3	0.185328	0.373848	0.335736	0.343808	0.479167	0.47541	0.52907	0.193548	0.282828	0.169903	0.204762	0.404255	0.454545	0.353535	0.263736	0.533981
12	4771682	G	A	rs2267549	NDUFA9	single nucleotide variant	NM_005002.4(NDUFA9):c.553-17G>A	not specified	Karitiana(HGDP)	0.402367	0.561918	Benign	A	0.4	0.448269	0.400576	0.442188	0.225588	0.573984	0.376193	0.34002	0.366702	0.335526	0.333032	0.494813	0.444488	0.413109	0.464034	0.387193	0.427776	0.23775	0.548463	0.306897	0.344072	0.482421	0.444098	0.430812	0.177083	0.229508	0.360465	0.284946	0.429293	0.373786	0.333333	0.484043	0.151515	0.469697	0.412088	0.38835
18	47383243	C	T	rs1942418	MYO5B	single nucleotide variant	NM_001080467.2(MYO5B):c.3962G>A (p.Gly1321Glu)	Diarrhea with Microvillus Atrophy;not specified	Chukchis(HuOrigin)	0.155504	0.561887	Benign	T	0.0666667	0.0467917	0.0514551	0.0500195	0.0547662	0.383852	0.0447776	0.292716	0.357892	0.373134	0.2742	0.0578386	0.04781	0.0573893	0.0440962	0.101523	0.0933377	0.0541533	0.329009	0.0241379	0.29768	0.0561313	0.0465101	0.0848708	0.0572917	0.106557	0.127907	0.150538	0.0454545	0.291262	0.238095	0.196809	0.0454545	0.0555556	0.0769231	0.174757
14	74424938	T	C	rs3180946	COQ6	single nucleotide variant	NM_182476.2(COQ6):c.570T>C (p.His190=)	not provided;not specified	Papuan(HGDP)	0.261658	0.561872	Benign	C	0.487603	0.428236	0.399391	0.413015	0.0770887	0.320768	0.408712	0.0321844	0.0565741	0.0723684	0.025305	0.462025	0.418259	0.404726	0.4174	0.23491	0.368438	0.0832568	0.333726	0.392361	0.0296774	0.450806	0.429535	0.403137	0.0625	0.0983607	0.156977	0.0322581	0.40404	0.0436893	0.047619	0.361702	0.00505051	0.373737	0.450549	0.262136
12	58023981	C	A	rs715930	B4GALNT1	single nucleotide variant	NM_001478.4(B4GALNT1):c.666G>T (p.Leu222=)	not specified	Karitiana(HuOrigin)	0.188557	0.561443	Benign	A	0.198347	0.216927	0.151686	0.199632	0.271318	0.331124	0.122643	0.145514	0.134625	0.0921053	0.14896	0.207405	0.208102	0.175655	0.232157	0.140967	0.20616	0.282343	0.291274	0.113793	0.157861	0.209724	0.200688	0.214549	0.270833	0.295082	0.168605	0.0698925	0.252525	0.18932	0.138095	0.223404	0.191919	0.242424	0.208791	0.199029
1	6529443	A	G	rs730600	PLEKHG5	single nucleotide variant	NM_020631.4(PLEKHG5):c.2001T>C (p.Ser667=)	Distal spinal muscular atrophy;not specified	GWD(1KG_phase3)	0.208768	0.561144	Benign	G	0.22314	0.133967	0.165623	0.144969	0.592151	0.0936452	0.141567	0.00407786	0.00969094	0.0197368	0.00242685	0.168068	0.142287	0.166917	0.139014	0.176084	0.154886	0.591139	0.121462	0.148276	0	0.162925	0.145704	0.1875	0.619792	0.516393	0.180233	0	0.121212	0.00970874	0	0.175532	0.641414	0.126263	0.126374	0.300971
17	36486004	T	C	rs55727040	GPR179	single nucleotide variant	NM_001004334.3(GPR179):c.3448A>G (p.Lys1150Glu)	Congenital Stationary Night Blindness, Recessive	GWD(1KG_phase3)	0.102761	0.560956	Benign	C	0.0289256	0.0506857	0.0921614	0.0556736	0.416105	0.070839	0.0558577	0.000223514	0	0	0.000286821	0.0145207	0.0537794	0.0592453	0.0395485	0.0258603	0.0910317	0.401175	0.0896226	0.0689655	0	0.0126655	0.050986	0.0680147	0.447917	0.311475	0.0290698	0	0.0656566	0	0	0.12234	0.444444	0.0151515	0.0549451	0.0291262
7	140449071	C	G	rs3789806	BRAF	single nucleotide variant	NM_004333.4(BRAF):c.1992+16G>C	Rasopathy;not provided;not specified	MSL(1KG_phase3)	0.268585	0.560827	Benign	G	0.170833	0.139092	0.1822	0.150703	0.674182	0.0994259	0.204988	0.185689	0.13505	0.0723684	0.200264	0.148785	0.142308	0.192943	0.114614	0.312582	0.179134	0.669922	0.120567	0.196552	0.204108	0.151698	0.139148	0.177716	0.630208	0.655738	0.389535	0.236559	0.131313	0.213592	0.180952	0.164894	0.747475	0.131313	0.131868	0.300971
7	810219	T	C	rs4720951	DNAAF5	single nucleotide variant	NM_017802.3(DNAAF5):c.1895T>C (p.Val632Ala)	not specified	BTQ(AAGC)	0.397643	0.560691	Benign	C	0.470833	0.469481	0.498603	0.47619	0.350838	0.399838	0.467376	0.337779	0.338135	0.310811	0.337962	0.514041	0.471467	0.486038	0.455713	0.365582	0.452762	0.349896	0.406398	0.431034	0.349032	0.522478	0.465517	0.456722	0.291667	0.409836	0.436047	0.392473	0.414141	0.349515	0.395238	0.457447	0.368687	0.474747	0.43956	0.334951
8	15508200	T	C	rs1035972	TUSC3	single nucleotide variant	NM_006765.3(TUSC3):c.309-6T>C	Congenital disorder of glycosylation;not specified	Papuan(HGDP)	0.351211	0.560553	Likely_benign	C	0.413223	0.364566	0.333391	0.35646	0.174582	0.373605	0.334226	0.427523	0.410639	0.375	0.432543	0.439313	0.358807	0.361798	0.362669	0.235807	0.351369	0.178317	0.353428	0.310345	0.438224	0.439551	0.385995	0.381434	0.192708	0.229508	0.261628	0.451613	0.419192	0.432039	0.466667	0.303191	0.156566	0.419192	0.384615	0.169903
3	124467209	G	A	rs11927687	UMPS	single nucleotide variant	NM_000373.3(UMPS):c.*4278G>A	Orotic aciduria	Onge(HuOrigin)	0.258383	0.559799	Benign	A	0.284615	0.272464	0.352804	0.294567	0.187479	0.292468	0.403732	0.377756	0.283191	0.5	0.398269	0.221047	0.281644	0.288618	0.277124	0.185126	0.306824	0.179614	0.272512	0.437063	0.368726	0.222126	0.287619	0.285846	0.166667	0.139344	0.232558	0.397849	0.343434	0.398058	0.37619	0.31383	0.126263	0.242424	0.269231	0.165049
2	179427186	A	G	rs2366751	TTN	single nucleotide variant	NM_133378.4(TTN):c.75969T>C (p.Gly25323=)	Cardiovascular phenotype;Dilated Cardiomyopathy, Dominant;Distal myopathy Markesbery-Griggs type;Hereditary myopathy with early respiratory failure;Hypertrophic cardiomyopathy;Limb-Girdle Muscular Dystrophy, Recessive;Myopathy, early-onset, with fatal cardiomyopathy;not specified	Papuan(HuOrigin);Papuan(HGDP)	0.440491	0.559509	Likely_benign	G	0.231405	0.218687	0.24392	0.224705	0.543748	0.425003	0.279447	0.704183	0.652703	0.681818	0.718042	0.276533	0.225082	0.235515	0.226448	0.514165	0.306184	0.539959	0.410377	0.234483	0.691958	0.269275	0.22905	0.302947	0.546875	0.516393	0.633721	0.83871	0.207071	0.65534	0.714286	0.388298	0.636364	0.308081	0.236264	0.495146
8	144993377	A	G	rs6992333	PLEC	single nucleotide variant	NM_000445.4(PLEC):c.10693T>C (p.Leu3565=)	not specified	YRI(1KG_phase3)	0.394278	0.559426	Benign	G	0.347107	0.43263	0.461835	0.424263	0.844957	0.288263	0.473972	0.145043	0.147983	0.149254	0.144202	0.406349	0.425288	0.457294	0.396199	0.363137	0.424678	0.833333	0.365248	0.451389	0.142303	0.395389	0.40883	0.426199	0.880208	0.803279	0.354651	0.139785	0.434343	0.145631	0.161905	0.446809	0.934343	0.388889	0.417582	0.364078
3	70016904	C	T	rs704246	MITF	single nucleotide variant	NM_000248.3(MITF):c.*2505C>T	Tietz syndrome;Waardenburg syndrome	Papuan(HuOrigin)	0.297728	0.559415	Benign	T	NA	NA	NA	NA	NA	NA	NA	NA	NA	NA	NA	NA	NA	NA	NA	NA	NA	0.347305	0.32109	0.270833	0.233633	0.263673	0.280543	0.296875	0.359375	0.295082	0.313953	0.263441	0.277778	0.305825	0.252381	0.37766	0.30303	0.257576	0.241758	0.276699
2	179430997	G	A	rs3731746	TTN	single nucleotide variant	NM_133378.4(TTN):c.72158C>T (p.Thr24053Met)	Cardiovascular phenotype;Dilated Cardiomyopathy, Dominant;Distal myopathy Markesbery-Griggs type;Hereditary myopathy with early respiratory failure;Hypertrophic cardiomyopathy;Limb-Girdle Muscular Dystrophy, Recessive;Myopathy, early-onset, with fatal cardiomyopathy;not specified	Papuan(HGDP)	0.293528	0.559413	Likely_benign	A	0.165289	0.161137	0.189028	0.167787	0.337232	0.185367	0.229912	0.613203	0.564576	0.626866	0.62623	0.172611	0.165241	0.182945	0.156595	0.303412	0.20814	0.336013	0.211584	0.165517	0.609091	0.163018	0.171709	0.211786	0.291667	0.295082	0.377907	0.731183	0.131313	0.57767	0.619048	0.223404	0.409091	0.176768	0.17033	0.286408
2	127826533	A	G	rs1060743	BIN1	single nucleotide variant	NM_139343.2(BIN1):c.486T>C (p.Thr162=)	Autosomal recessive centronuclear myopathy;not specified	Onge(HuOrigin)	0.349927	0.559164	Likely_benign	G	0.239669	0.301692	0.303777	0.29805	0.240618	0.395128	0.283701	0.440687	0.393138	0.322368	0.45452	0.295869	0.301994	0.264419	0.310792	0.445773	0.310688	0.246952	0.358491	0.313793	0.433634	0.301555	0.288441	0.270718	0.255208	0.270492	0.47093	0.489247	0.308081	0.402913	0.538095	0.335106	0.227273	0.242424	0.302198	0.325243
21	43805637	C	T	rs2839501	TMPRSS3	single nucleotide variant	NM_024022.2(TMPRSS3):c.453G>A (p.Val151=)	Nonsyndromic Hearing Loss, Recessive;not specified	GWD(1KG_phase3)	0.387807	0.559096	Likely_benign	T	0.301653	0.360395	0.374218	0.356354	0.823244	0.299838	0.375893	0.267117	0.233807	0.328947	0.275236	0.280736	0.35794	0.347191	0.35031	0.292298	0.363755	0.814355	0.324292	0.355172	0.283312	0.276339	0.344465	0.355699	0.880208	0.655738	0.238372	0.268817	0.308081	0.23301	0.266667	0.367021	0.944444	0.272727	0.368132	0.364078
2	219562675	G	A	rs1863704	STK36	single nucleotide variant	NM_015690.4(STK36):c.3008G>A (p.Gly1003Asp)	not specified	Papuan(HuOrigin)	0.226849	0.558865	Benign	A	0.330579	0.393142	0.379154	0.36847	0.0636151	0.341177	0.343254	0.0605632	0.0793609	0.0723684	0.0554631	0.400564	0.382374	0.358427	0.385819	0.279854	0.350603	0.0657925	0.352594	0.362069	0.0571245	0.396601	0.383221	0.356354	0.0260417	0.172131	0.244186	0.0483871	0.338384	0.0582524	0.0380952	0.265957	0	0.358586	0.357143	0.291262
2	26507076	A	T	rs2303893	HADHB	single nucleotide variant	NM_000183.2(HADHB):c.1149+4A>T	Mitochondrial trifunctional protein deficiency;not specified	CHB(1KG_phase3)	0.261585	0.558803	Benign	T	0.0743802	0.0630953	0.0498434	0.0571945	0.0302079	0.371284	0.083846	0.759978	0.78968	0.743421	0.752288	0.0608808	0.0572439	0.047191	0.0519749	0.0582163	0.105932	0.0337543	0.320331	0.0655172	0.763192	0.0613479	0.0612113	0.0726103	0.03125	0.0409836	0.0988372	0.672043	0.0757576	0.820388	0.752381	0.244681	0.0151515	0.0656566	0.104396	0.0339806
16	2140680	T	C	rs10960	PKD1	single nucleotide variant	NM_001009944.2(PKD1):c.12133A>G (p.Ile4045Val)	Polycystic kidney disease, adult type;not specified	GWD(1KG_phase3)	0.184737	0.558626	Benign	C	0.208333	0.178089	0.219831	0.182208	0.581076	0.122275	0.255108	0.000274695	0	0	0.00035068	0.221564	0.182809	0.200613	0.172924	0.0919536	0.18997	0.592576	0.134434	0.248276	0.000643501	0.222895	0.175618	0.202952	0.604167	0.47541	0.0581395	0	0.171717	0	0	0.244681	0.626263	0.247475	0.148352	0.0970874
17	7606722	C	G	rs7640	WRAP53	single nucleotide variant	NM_018081.2(WRAP53):c.1565C>G (p.Ala522Gly)	Dyskeratosis Congenita, Recessive;not specified	YRI(1KG_phase3)	0.422898	0.558584	Benign	G	0.233333	0.203095	0.195701	0.211505	0.824941	0.265856	0.199245	0.420597	0.353358	0.309211	0.439575	0.205817	0.205458	0.203843	0.206311	0.445588	0.256368	0.818529	0.284198	0.189655	0.453595	0.213915	0.220354	0.274492	0.869792	0.786885	0.377907	0.467742	0.212121	0.470874	0.419048	0.265957	0.964646	0.232323	0.225275	0.417476
10	43615505	G	A	rs2472737	RET	single nucleotide variant	NM_020975.4(RET):c.2608-24G>A	not specified	Karitiana(HuOrigin)	0.191603	0.558397	Benign	A	0.239316	0.227588	0.203302	0.214054	0.149822	0.153092	0.123565	0.233136	0.203577	0.146667	0.241931	0.289268	0.226117	0.222905	0.248286	0.1595	0.197347	0.149034	0.161557	0.178322	0.253866	0.27618	0.222222	0.236648	0.125	0.122951	0.209302	0.231183	0.207071	0.242718	0.219048	0.207447	0.0858586	0.262626	0.175824	0.116505
2	179421694	A	G	rs9808377	TTN	single nucleotide variant	NM_133378.4(TTN):c.80483T>C (p.Ile26828Thr)	Cardiovascular phenotype;Dilated Cardiomyopathy, Dominant;Distal myopathy Markesbery-Griggs type;Hereditary myopathy with early respiratory failure;Hypertrophic cardiomyopathy;Limb-Girdle Muscular Dystrophy, Recessive;Myopathy, early-onset, with fatal cardiomyopathy;not specified	Papuan(HuOrigin);Papuan(HGDP)	0.44161	0.55839	Likely_benign	G	0.231405	0.216916	0.242424	0.224019	0.543416	0.424138	0.279769	0.703878	0.653369	0.679104	0.7175	0.277458	0.223873	0.234786	0.225604	0.514548	0.305537	0.540189	0.407801	0.234483	0.69131	0.269031	0.22732	0.300738	0.546875	0.516393	0.633721	0.83871	0.20202	0.65534	0.714286	0.388298	0.636364	0.308081	0.230769	0.490291
7	94030899	T	C	rs1800222	COL1A2	single nucleotide variant	NM_000089.3(COL1A2):c.246T>C (p.Asp82=)	Ehlers-Danlos syndrome, procollagen proteinase deficient;Osteogenesis Imperfecta, Dominant;not specified	MbutiPygmy(HGDP)	0.249497	0.558196	Benign	C	0.0966387	0.113145	0.161555	0.125188	0.524637	0.133325	0.148746	0.39018	0.434806	0.447368	0.377523	0.110538	0.12145	0.146772	0.11009	0.0849088	0.154119	0.518921	0.121011	0.14539	0.390827	0.0972012	0.119673	0.155754	0.536458	0.409836	0.0697674	0.354839	0.10101	0.383495	0.409524	0.170213	0.686869	0.171717	0.164835	0.101942
11	64572602	G	A	rs2071313	MEN1	single nucleotide variant	NM_000244.3(MEN1):c.1269C>T (p.Asp423=)	Hereditary cancer-predisposing syndrome;Hyperparathyroidism;Multiple endocrine neoplasia;Multiple endocrine neoplasia, type 1;not specified	Onge(HuOrigin)	0.350896	0.558195	Likely_benign	A	0.436975	0.412354	0.422172	0.422364	0.0818551	0.340388	0.346024	0.383611	0.37978	0.348684	0.384994	0.439313	0.420718	0.420617	0.431494	0.490919	0.39618	0.0863375	0.327014	0.351724	0.385013	0.438687	0.424633	0.421731	0.0572917	0.114754	0.488372	0.295699	0.393939	0.446602	0.361905	0.388298	0.00505051	0.429293	0.417582	0.470874
22	42321251	A	G	rs7290134	TNFRSF13C	single nucleotide variant	NM_052945.3(TNFRSF13C):c.*120T>C	Common Variable Immune Deficiency, Recessive	MSL(1KG_phase3)	0.418439	0.558032	Benign	G	NA	NA	NA	NA	NA	NA	NA	NA	NA	NA	NA	NA	NA	NA	NA	NA	NA	0.821297	0.556604	0.255245	0.109314	0.175707	0.211863	0.271218	0.8125	0.786885	0.27907	0.0913978	0.247475	0.140777	0.119048	0.468085	0.954545	0.176768	0.241758	0.495146
1	116240026	G	A	rs6428677	CASQ2;VANGL1	single nucleotide variant	NM_138959.2(VANGL1):c.*6026G>A	Catecholaminergic polymorphic ventricular tachycardia;Caudal dysgenesis syndrome;Neural tube defect	BTQ(AAGC)	0.275305	0.558028	Likely_benign	A	NA	NA	NA	NA	NA	NA	NA	NA	NA	NA	NA	NA	NA	NA	NA	NA	NA	0.287175	0.298349	0.152778	0.357326	0.214121	0.205215	0.197974	0.317708	0.229508	0.27907	0.467742	0.247475	0.296117	0.404762	0.292553	0.287879	0.186869	0.214286	0.208738
3	124464642	T	G	rs10934684	UMPS	single nucleotide variant	NM_000373.3(UMPS):c.*1711T>G	Orotic aciduria	Onge(HuOrigin)	0.260412	0.557769	Benign	G	0.287879	0.272492	0.354264	0.29506	0.194974	0.292782	0.403903	0.377707	0.283191	0.5	0.3982	0.220758	0.281922	0.290323	0.278357	0.185356	0.307365	0.184029	0.273585	0.427083	0.369032	0.22251	0.28723	0.2869	0.177083	0.139344	0.232558	0.397849	0.343434	0.398058	0.37619	0.31383	0.126263	0.242424	0.269231	0.165049
16	23403744	A	G	rs8057712	COG7	single nucleotide variant	NM_153603.3(COG7):c.2103T>C (p.Pro701=)	Congenital disorder of glycosylation;not specified	Ju_hoan_North(HuOrigin)	0.10181	0.557281	Likely_benign	G	0.0206612	0.0257243	0.0447748	0.0308	0.228431	0.0922285	0.0728464	0.0226704	0.0322158	0.0197368	0.0201747	0.0260556	0.0291225	0.0423221	0.0244584	0.0536974	0.0493646	0.217881	0.0969267	0.062069	0.0231065	0.0241657	0.0261963	0.0505515	0.234375	0.172131	0.0581395	0	0.0353535	0.0291262	0.0190476	0.0744681	0.257576	0.0252525	0.00549451	0.0582524
2	71838443	C	T	rs11558179	DYSF	single nucleotide variant	NM_003494.3(DYSF):c.3972C>T (p.Asn1324=)	Limb-Girdle Muscular Dystrophy, Recessive;Miyoshi myopathy;not specified	GWD(1KG_phase3)	0.128897	0.556944	Benign	T	0.0666667	0.0513406	0.0536679	0.0524709	0.490183	0.0932611	0.0829686	0.0365071	0.0479811	0.0526316	0.033301	0.0434964	0.0530507	0.0447032	0.0569752	0.0538527	0.0792484	0.480978	0.0943396	0.0758621	0.030888	0.0518135	0.0618751	0.0808824	0.453125	0.516393	0.0465116	0.00537634	0.0353535	0.0582524	0.0380952	0.106383	0.580808	0.0454545	0.0164835	0.038835
10	73558852	A	G	rs4747193	CDH23	single nucleotide variant	NM_022124.5(CDH23):c.7055-16A>G	not specified	Pima(HuOrigin)	0.371643	0.556929	Benign	G	0.216102	0.293178	0.239409	0.267303	0.450867	0.443941	0.232621	0.621876	0.621006	0.686567	0.621494	0.348708	0.277677	0.214989	0.289096	0.269803	0.30377	0.44589	0.427896	0.213793	0.626933	0.33727	0.268656	0.298713	0.463542	0.434426	0.372093	0.526882	0.282828	0.606796	0.580952	0.281915	0.459596	0.333333	0.32967	0.325243
12	13717508	G	A	rs1806201	GRIN2B	single nucleotide variant	NM_000834.3(GRIN2B):c.2664C>T (p.Thr888=)	Intellectual Disability, Dominant;Neurodevelopmental;not provided;not specified	BTQ(AAGC)	0.318324	0.556676	Likely_benign	A	0.291667	0.266714	0.273834	0.277595	0.0990735	0.328727	0.332804	0.522512	0.496595	0.559211	0.528988	0.372201	0.271068	0.284091	0.267682	0.417266	0.310705	0.101658	0.304245	0.341379	0.501292	0.362903	0.278876	0.303506	0.03125	0.131148	0.418605	0.478495	0.237374	0.509709	0.552381	0.244681	0.0606061	0.358586	0.21978	0.378641
16	89998957	C	T	rs2302897	TUBB3	single nucleotide variant	NM_006086.3(TUBB3):c.58-22C>T	not specified	GWD(1KG_phase3)	0.151863	0.556101	Likely_benign	T	0.05	0.0664919	0.123076	0.0770439	0.477171	0.0690852	0.0983819	0.00125109	0.000786164	0.0263158	0.00110988	0.028759	0.0741266	0.116629	0.0572985	0.12433	0.0980681	0.476661	0.0837264	0.113793	0.000643501	0.0333717	0.0623297	0.0974265	0.494792	0.47541	0.145349	0.00537634	0.0757576	0	0	0.0691489	0.464646	0.010101	0.0824176	0.165049
5	1279790	C	T	rs10069690	TERT	single nucleotide variant	NM_198253.2(TERT):c.1951-205G>A	Chronic osteomyelitis;Dyskeratosis congenita, autosomal dominant, 2;Idiopathic fibrosing alveolitis, chronic form	Ju_hoan_North(HuOrigin)	0.330545	0.555819	Benign	T	NA	NA	NA	NA	NA	NA	NA	NA	NA	NA	NA	NA	NA	NA	NA	NA	NA	0.589986	0.219858	0.296552	0.155327	0.297921	0.264736	0.277164	0.645833	0.52459	0.273256	0.177419	0.282828	0.194175	0.109524	0.239362	0.666667	0.343434	0.230769	0.339806
3	77089395	T	C	rs3923745	ROBO2	single nucleotide variant	NM_002942.4(ROBO2):c.-542T>C	Vesicoureteral reflux	MbutiPygmy(HGDP)	0.406077	0.555461	Benign	C	NA	NA	NA	NA	NA	NA	NA	NA	NA	NA	NA	NA	NA	NA	NA	NA	NA	0.678267	0.381797	0.303448	0.380983	0.333142	0.3621	0.380996	0.776042	0.672131	0.412791	0.403226	0.338384	0.334951	0.409524	0.398936	0.747475	0.308081	0.296703	0.42233
15	45385496	A	T	rs4775744	DUOX2	single nucleotide variant	NM_014080.4(DUOX2):c.*852T>A	Congenital hypothyroidism	ESN(1KG_phase3)	0.182343	0.555031	Likely_benign	T	NA	NA	NA	NA	NA	NA	NA	NA	NA	NA	NA	NA	NA	NA	NA	NA	NA	0.567935	0.14033	0.0862069	0.0430039	0.074266	0.0887201	0.120626	0.609375	0.57377	0.0406977	0.0322581	0.0555556	0.0436893	0.052381	0.148936	0.737374	0.0707071	0.0989011	0.0291262
6	57055354	C	T	rs1040461	RAB23	single nucleotide variant	NM_183227.2(RAB23):c.619G>A (p.Gly207Ser)	Carpenter syndrome	MbutiPygmy(HGDP)	0.099069	0.554777	Likely_benign	T	0.0958333	0.0786762	0.0549269	0.080763	0.182025	0.111333	0.0370113	0.0949766	0.0620744	0.0394737	0.104271	0.167868	0.0810544	0.0670915	0.09801	0.0794081	0.0828441	0.187572	0.0978774	0.0482759	0.108974	0.164553	0.0881895	0.0965074	0.192708	0.196721	0.0988372	0.134409	0.0808081	0.0728155	0.0761905	0.117021	0.237374	0.166667	0.0769231	0.0631068
21	47536546	C	T	rs762438	COL6A2	single nucleotide variant	NM_001849.3(COL6A2):c.928-19C>T	not specified	Karitiana(HGDP)	0.445785	0.554215	Benign	T	0.544643	0.512736	0.483769	0.521547	0.242946	0.657093	0.529958	0.426586	0.427449	0.361842	0.427041	0.637731	0.517907	0.461009	0.542439	0.35796	0.527058	0.249482	0.602594	0.568966	0.432903	0.61399	0.532491	0.557196	0.203125	0.295082	0.313953	0.483871	0.535354	0.407767	0.371429	0.606383	0.156566	0.651515	0.467033	0.359223
8	143992859	G	A	rs72499120	CYP11B2	single nucleotide variant	NM_000498.3(CYP11B2):c.*537C>T	Corticosterone methyloxidase type 1 deficiency;Corticosterone methyloxidase type 2 deficiency;Hyperaldosteronism, familial, type I	Chukchis(HuOrigin)	0.185285	0.553846	Benign	A	NA	NA	NA	NA	NA	NA	NA	NA	NA	NA	NA	NA	NA	NA	NA	NA	NA	0.0514588	0.106132	0.0381944	0.494852	0.0492228	0.0291942	0.0542279	0.0520833	0.057377	0.25	0.532258	0.0151515	0.514563	0.480952	0.106383	0.0656566	0.0505051	0.0164835	0.126214
3	129253473	A	G	rs2855558	RHO	single nucleotide variant	NM_000539.3(RHO):c.*912A>G	Congenital Stationary Night Blindness, Dominant;Retinitis Pigmentosa, Dominant/Recessive	BiakaPygmy(HuOrigin);Ju_hoan_North(HuOrigin);Mandenka(HuOrigin)	0.446199	0.553801	Benign	G	NA	NA	NA	NA	NA	NA	NA	NA	NA	NA	NA	NA	NA	NA	NA	NA	NA	0.812673	0.261792	0.272414	0.669459	0.0734024	0.139232	0.188192	0.885417	0.745902	0.465116	0.698925	0.166667	0.57767	0.666667	0.297872	0.954545	0.0707071	0.153846	0.364078
18	29122799	G	A	rs2278792	DSG2	single nucleotide variant	NM_001943.4(DSG2):c.2318G>A (p.Arg773Lys)	Arrhythmogenic right ventricular cardiomyopathy;Cardiovascular phenotype;Dilated Cardiomyopathy, Dominant;not specified	Nganasans(Estonian_Biocentre)	0.267677	0.553751	Likely_benign	A	0.288462	0.261887	0.209952	0.255854	0.0722207	0.281327	0.168785	0.466582	0.500526	0.463636	0.455719	0.335317	0.255072	0.203498	0.268869	0.24653	0.249463	0.0776583	0.310096	0.192308	0.442857	0.341657	0.260567	0.254735	0.046875	0.057377	0.296512	0.456989	0.282828	0.441748	0.442857	0.260638	0.0252525	0.333333	0.230769	0.213592
10	55949151	G	A	rs16905686	PCDH15	single nucleotide variant	NM_033056.3(PCDH15):c.1306-4123C>T	not specified	eas_jpn(gnomAD.exomes)	0.387212	0.553466	Benign	A	0.163462	0.134956	0.151112	0.142013	0.12286	0.287953	0.145153	0.841275	0.874912	0.940678	0.829801	0.140559	0.138136	0.163012	0.130117	0.348748	0.210782	0.125259	0.251781	0.141379	0.839538	0.148062	0.137038	0.173148	0.104167	0.147541	0.482558	0.854839	0.106061	0.849515	0.809524	0.239362	0.146465	0.146465	0.120879	0.393204
10	55582905	G	T	rs10825114	PCDH15	single nucleotide variant	NM_033056.3(PCDH15):c.4581C>A (p.Pro1527=)	Nonsyndromic Hearing Loss, Recessive;Retinitis pigmentosa-deafness syndrome;not specified	JPT(HapMap)	0.291747	0.553386	Likely_benign	T	0.0375	0.0480171	0.0502263	0.0514887	0.180397	0.337509	0.0456621	0.732003	0.77999	0.815789	0.718416	0.0690613	0.0524109	0.056015	0.0613135	0.239105	0.128306	0.184887	0.283019	0.0448276	0.732648	0.0719217	0.0560675	0.104779	0.197917	0.172131	0.331395	0.591398	0.040404	0.68932	0.752381	0.164894	0.212121	0.0555556	0.0384615	0.218447
1	57340727	C	A	rs652785	C8A	single nucleotide variant	NM_000562.2(C8A):c.277C>A (p.Gln93Lys)	COMPLEMENT COMPONENT 8, ALPHA SUBUNIT, A/B POLYMORPHISM;not specified	BTQ(AAGC)	0.363671	0.552996	Benign	A	0.384298	0.384955	0.38768	0.38389	0.206208	0.210554	0.40957	0.466167	0.39075	0.348684	0.487137	0.351891	0.381799	0.401873	0.369545	0.498103	0.36225	0.207443	0.215802	0.40625	0.453608	0.331797	0.379805	0.379374	0.197917	0.237705	0.465116	0.623656	0.343434	0.436893	0.509524	0.308511	0.121212	0.393939	0.313187	0.446602
17	1565461	A	G	rs3814969	PRPF8	single nucleotide variant	NM_006445.3(PRPF8):c.3775-14T>C	Retinitis Pigmentosa, Dominant	LWK(1KG_phase3)	0.149169	0.552851	Likely_benign	G	0.0211864	0.0187796	0.0308405	0.0251756	0.533753	0.0349207	0.0621025	0.0715606	0.0502881	0.0460526	0.0774619	0.0313226	0.0229022	0.0348221	0.0221626	0.0866767	0.0510171	0.524637	0.0471698	0.0486111	0.0688546	0.0285303	0.0236675	0.0672192	0.552083	0.467213	0.0697674	0.0967742	0.030303	0.101942	0.0904762	0.0425532	0.626263	0.0151515	0.0164835	0.131068
9	140638461	T	C	rs1129768	EHMT1	single nucleotide variant	NM_024757.4(EHMT1):c.1089T>C (p.Gly363=)	Chromosome 9q deletion syndrome;Neurodevelopmental;not specified	ESN(1KG_phase3)	0.391601	0.552843	Benign	C	0.392562	0.350399	0.378219	0.361136	0.80548	0.571871	0.434002	0.115807	0.11891	0.131579	0.114819	0.27674	0.354864	0.364114	0.343085	0.362977	0.394909	0.800944	0.581368	0.403448	0.110897	0.27618	0.361773	0.376838	0.859375	0.745902	0.343023	0.123656	0.383838	0.101942	0.119048	0.521277	0.944444	0.232323	0.313187	0.339806
5	67522722	C	T	rs706713	PIK3R1	single nucleotide variant	NM_181523.2(PIK3R1):c.219C>T (p.Tyr73=)	not specified	Nganasans(HuOrigin)	0.40191	0.552635	Likely_benign	T	0.256198	0.238656	0.193883	0.230007	0.412936	0.39203	0.200119	0.699685	0.76022	0.76	0.683035	0.260974	0.234282	0.229182	0.250364	0.326549	0.271967	0.409353	0.366983	0.227586	0.681057	0.268279	0.239826	0.246753	0.432292	0.5	0.406977	0.521505	0.232323	0.771845	0.714286	0.308511	0.494949	0.328283	0.230769	0.38835
2	27315252	G	A	rs2304681	KHK	single nucleotide variant	NM_000221.2(KHK):c.145G>A (p.Val49Ile)	Fructosuria, essential	Karitiana(HGDP)	0.376799	0.551773	Benign	A	0.408333	0.368839	0.398729	0.3825	0.316921	0.623727	0.387664	0.234389	0.274489	0.210526	0.224018	0.333898	0.378193	0.410045	0.375633	0.310952	0.391702	0.325057	0.595519	0.406897	0.244859	0.340242	0.383966	0.371296	0.328125	0.336066	0.325581	0.172043	0.373737	0.354369	0.228571	0.398936	0.30303	0.348485	0.346154	0.237864
8	144992361	T	C	rs7822511	PLEC	single nucleotide variant	NM_000445.4(PLEC):c.11709A>G (p.Pro3903=)	not specified	YRI(1KG_phase3)	0.401964	0.551739	Benign	C	0.335165	0.439676	0.458224	0.428582	0.850059	0.289739	0.443129	0.183109	0.205249	0.222222	0.176712	0.413729	0.428881	0.452734	0.398404	0.361835	0.418991	0.836749	0.362884	0.42069	0.170308	0.404679	0.413106	0.430168	0.875	0.795082	0.360465	0.166667	0.434343	0.174757	0.17619	0.457447	0.934343	0.383838	0.417582	0.359223
1	205884274	T	C	rs6669481	SLC26A9	single nucleotide variant	NM_134325.2(SLC26A9):c.2410A>G (p.Arg804Gly)	not specified	Damara(HuOrigin)	0.115008	0.551658	Benign	C	0.116667	0.0940502	0.12524	0.1008	0.417036	0.0708616	0.110733	0	0	0	0	0.102724	0.0982754	0.10165	0.0897249	0.0215184	0.0981002	0.414586	0.0898345	0.144828	0	0.107719	0.0921944	0.111624	0.4375	0.401639	0.0116279	0	0.10101	0	0	0.106383	0.484848	0.10101	0.0659341	0.0194175
16	16170568	C	T	rs4148351	ABCC1	single nucleotide variant	NM_004996.3(ABCC1):c.1988+310C>T	Familial cancer of breast	Koryaks(Estonian_Biocentre)	0.148362	0.551638	Uncertain_significance	T	NA	NA	NA	NA	NA	NA	NA	NA	NA	NA	NA	NA	NA	NA	NA	NA	NA	0.0478491	0.0896226	0.148276	0.101542	0.169452	0.129882	0.158088	0.0625	0.0655738	0.162791	0.0591398	0.126263	0.0485437	0.0809524	0.0851064	0.0656566	0.156566	0.159341	0.257282
12	8667897	A	G	rs4304840	CLEC4D	single nucleotide variant	NM_080387.4(CLEC4D):c.94A>G (p.Ser32Gly)	not specified	Damara(HuOrigin)	0.28183	0.551503	Benign	G	0.2	0.219467	0.275844	0.228673	0.565322	0.150029	0.2729	0.139635	0.16151	0.118421	0.134044	0.202308	0.229927	0.260886	0.225201	0.230243	0.245156	0.560624	0.196682	0.227586	0.156371	0.213295	0.209005	0.22048	0.567708	0.508197	0.267442	0.0591398	0.222222	0.165049	0.17619	0.164894	0.651515	0.242424	0.225275	0.247573
17	8792093	G	A	rs16957702	PIK3R5	single nucleotide variant	NM_001142633.2(PIK3R5):c.1011C>T (p.Asp337=)	not specified	Xuun(HuOrigin)	0.217844	0.551387	Likely_benign	A	0.168142	0.309816	0.319077	0.302193	0.295216	0.242622	0.322412	0.00070837	0.000785752	0	0.00069512	0.191326	0.307759	0.304841	0.307704	0.161778	0.278036	0.283743	0.254137	0.313793	0.00128205	0.208309	0.286114	0.264706	0.34375	0.45082	0.122093	0	0.277778	0	0.0047619	0.255319	0.277778	0.212121	0.307692	0.169903
4	114257201	C	T	rs3736575	ANK2	single nucleotide variant	NM_001148.4(ANK2):c.3579C>T (p.Arg1193=)	Cardiovascular phenotype;Long QT syndrome;not specified	LWK(1KG_phase3)	0.20623	0.551346	Likely_benign	T	0.0932203	0.0990367	0.105254	0.101044	0.563198	0.139084	0.099	0.119564	0.142407	0.0986842	0.113744	0.0615698	0.0989734	0.104135	0.0932379	0.130345	0.132907	0.546965	0.132701	0.062069	0.135135	0.064479	0.104002	0.121072	0.520833	0.491803	0.151163	0.123656	0.106061	0.135922	0.128571	0.143617	0.611111	0.0707071	0.0989011	0.092233
17	76988785	G	A	rs11891	CANT1	single nucleotide variant	NM_138793.3(CANT1):c.*847C>T	Desbuquois Dysplasia	Ju_hoan_North(HuOrigin)	0.153431	0.551114	Benign	A	0.0941176	0.0888928	0.0727889	0.0890218	0.196225	0.0595449	0.0847319	0.329962	0.314834	0.328947	0.334252	0.101286	0.0870013	0.0791107	0.0884233	0.123593	0.089673	0.188493	0.06974	0.0931034	0.330323	0.102992	0.090048	0.109375	0.177083	0.106557	0.19186	0.236559	0.0757576	0.300971	0.319048	0.101064	0.19697	0.111111	0.0879121	0.135922
2	47703500	T	C	rs2303428	MSH2	single nucleotide variant	NM_000251.2(MSH2):c.2006-6T>C	Hereditary cancer-predisposing syndrome;Lynch syndrome;Lynch syndrome I;not specified	BTQ(AAGC)	0.240968	0.550698	Benign	C	0.107438	0.10074	0.0906555	0.0939135	0.0213775	0.0793113	0.0948601	0.354927	0.301837	0.361842	0.368892	0.104791	0.0994964	0.101873	0.107688	0.134457	0.107539	0.0263218	0.0896226	0.0758621	0.366152	0.116226	0.102918	0.116728	0.0208333	0.0409836	0.186047	0.505376	0.0858586	0.262136	0.304762	0.111702	0	0.0505051	0.0934066	0.106796
17	41244936	G	A	rs799917	BRCA1	single nucleotide variant	NM_007294.3(BRCA1):c.2612C>T (p.Pro871Leu)	Breast-ovarian cancer, familial 1;Familial cancer of breast;Hereditary breast and ovarian cancer syndrome;Hereditary cancer-predisposing syndrome;not provided;not specified	Damara(HuOrigin);Xuun(HuOrigin);MbutiPygmy(HGDP)	0.449594	0.550406	Benign	A	0.347107	0.337905	0.348876	0.337859	0.825314	0.348438	0.376935	0.378902	0.303824	0.256579	0.400069	0.403721	0.333797	0.336207	0.31537	0.531642	0.377778	0.808479	0.34434	0.327586	0.368047	0.395677	0.347984	0.414365	0.838542	0.737705	0.523256	0.5	0.363636	0.349515	0.37619	0.515957	0.944444	0.358586	0.324176	0.509709
7	75615006	C	T	rs1057868	POR	single nucleotide variant	NM_000941.2(POR):c.1508C>T (p.Ala503Val)	Antley-Bixler syndrome with genital anomalies and disordered steroidogenesis;not specified	BTQ(AAGC)	0.325124	0.549876	Likely_benign	T	0.296296	0.282268	0.279082	0.288569	0.183913	0.281741	0.260505	0.373725	0.434104	0.359375	0.356626	0.409191	0.287156	0.287199	0.298801	0.353817	0.304282	0.181756	0.258865	0.255172	0.381258	0.40985	0.294908	0.312155	0.177083	0.229508	0.319767	0.365591	0.30303	0.339806	0.395238	0.345745	0.19697	0.313131	0.263736	0.34466
11	119213303	C	T	rs11217241	C1QTNF5;MFRP	single nucleotide variant	NM_031433.3(MFRP):c.1387+3G>A	Microphthalmia, isolated 6;Retinal degeneration;not specified	Papuan(HGDP)	0.185452	0.549842	Likely_benign	T	0.0434783	0.0691976	0.0659311	0.0661278	0.0706287	0.21784	0.0435887	0.437239	0.392538	0.39726	0.449579	0.100197	0.0690908	0.0671527	0.0741218	0.418785	0.11191	0.066582	0.175355	0.0451389	0.433719	0.0991926	0.0700703	0.0924214	0.078125	0.163934	0.5	0.516129	0.0808081	0.441748	0.447619	0.101064	0.0252525	0.0959596	0.0714286	0.470874
1	6526465	C	G	rs2986754	PLEKHG5	single nucleotide variant	NM_020631.4(PLEKHG5):c.*1158G>C	Distal spinal muscular atrophy	GWD(1KG_phase3)	0.140704	0.549561	Benign	G	NA	NA	NA	NA	NA	NA	NA	NA	NA	NA	NA	NA	NA	NA	NA	NA	NA	0.509706	0.0837264	0.113793	0	0.0279217	0.0634251	0.0909926	0.520833	0.409836	0.0755814	0	0.0555556	0	0	0.101064	0.59596	0.0454545	0.0604396	0.165049
5	233572	A	G	rs7710005	SDHA	single nucleotide variant	NM_004168.3(SDHA):c.896-20A>G	not specified	GWD(1KG_phase3)	0.189671	0.549267	Benign	G	0.0785124	0.13258	0.143428	0.126371	0.542031	0.19025	0.163492	0.0607807	0.053955	0.0131579	0.0630893	0.0862372	0.128233	0.112734	0.118772	0.0905201	0.149723	0.526999	0.181604	0.158621	0.0487805	0.0837169	0.112811	0.132353	0.578125	0.581967	0.116279	0.0483871	0.111111	0.0679612	0.052381	0.223404	0.580808	0.0757576	0.131868	0.0582524
5	228362	T	C	rs2115272	SDHA	single nucleotide variant	NM_004168.3(SDHA):c.684T>C (p.Asn228=)	Hereditary cancer-predisposing syndrome;Leigh syndrome;Mitochondrial complex II deficiency;Pheochromocytoma;not specified	GWD(1KG_phase3)	0.189698	0.54924	Likely_benign	C	0.0785124	0.132313	0.143155	0.126141	0.544873	0.189903	0.163492	0.0607807	0.053955	0.0131579	0.0630893	0.0862053	0.128017	0.11236	0.118723	0.0905082	0.150359	0.528315	0.181604	0.158621	0.0487805	0.0834292	0.112987	0.132841	0.578125	0.590164	0.116279	0.0483871	0.111111	0.0631068	0.052381	0.223404	0.580808	0.0757576	0.131868	0.0582524
11	75279846	C	T	rs649257	SERPINH1	single nucleotide variant	NM_001235.3(SERPINH1):c.693C>T (p.Thr231=)	Osteogenesis Imperfecta, Recessive;not specified	BTQ(AAGC)	0.367573	0.549094	Benign	T	0.396694	0.303563	0.299878	0.317668	0.448509	0.371812	0.295892	0.186915	0.204295	0.203947	0.182133	0.375312	0.309871	0.331835	0.312165	0.473378	0.342946	0.449885	0.351415	0.298611	0.184278	0.373991	0.335418	0.346296	0.479167	0.47541	0.52907	0.193548	0.282828	0.179612	0.204762	0.404255	0.454545	0.353535	0.263736	0.533981
12	6060960	G	A	rs2270151	VWF	single nucleotide variant	NM_000552.4(VWF):c.8155+50C>T	not specified	Onge(HuOrigin)	0.132734	0.549085	Benign	A	0.140496	0.157895	0.162515	0.156547	0.0702683	0.0781241	0.207225	0.191333	0.181509	0.105263	0.194841	0.117617	0.156135	0.158052	0.149946	0.102562	0.150538	0.075528	0.0931604	0.22069	0.203728	0.120035	0.148242	0.116667	0.0364583	0.057377	0.104651	0.188172	0.161616	0.228155	0.17619	0.12766	0.0757576	0.19697	0.164835	0.0970874
1	6527333	A	G	rs14708	PLEKHG5	single nucleotide variant	NM_020631.4(PLEKHG5):c.*290T>C	Distal spinal muscular atrophy	GWD(1KG_phase3)	0.216469	0.549018	Benign	G	NA	NA	NA	NA	NA	NA	NA	NA	NA	NA	NA	NA	NA	NA	NA	NA	NA	0.587958	0.123821	0.142361	0	0.163119	0.145017	0.1814	0.635417	0.52459	0.145349	0	0.131313	0.0145631	0.0047619	0.170213	0.641414	0.126263	0.126374	0.271845
8	90946056	A	G	rs9995	NBN	single nucleotide variant	NM_002485.4(NBN):c.*1754T>C	Microcephaly, normal intelligence and immunodeficiency	TH-MA(PASNP)	0.340043	0.548845	Benign	G	NA	NA	NA	NA	NA	NA	NA	NA	NA	NA	NA	NA	NA	NA	NA	NA	NA	0.297583	0.285545	0.251724	0.392169	0.318602	0.342129	0.339483	0.307292	0.385246	0.296512	0.489247	0.30303	0.354369	0.452381	0.324468	0.267677	0.262626	0.313187	0.354369
3	50341326	C	T	rs12488302	HYAL1	single nucleotide variant	NM_153281.1(HYAL1):c.-132G>A	Deficiency of hyaluronoglucosaminidase	Han(HuOrigin)	0.148588	0.548381	Benign	T	NA	NA	NA	NA	NA	NA	NA	NA	NA	NA	NA	NA	NA	NA	NA	NA	NA	0.0083831	0.372642	0.00344828	0.648196	0.0550432	0.00759444	0.0561694	0	0.0163934	0.0290698	0.682796	0.00505051	0.597087	0.671429	0.170213	0	0.0505051	0.00549451	0.00485437
14	65246623	T	C	rs1626923	SPTB	single nucleotide variant	NM_001355436.2(SPTB):c.4293A>G (p.Arg1431=)	Elliptocytosis;Spherocytosis, Dominant;not specified	Ju_hoan_North(HuOrigin)	0.383803	0.548015	Likely_benign	C	0.285124	0.322545	0.34447	0.323709	0.637637	0.189811	0.326636	0.363795	0.339969	0.322368	0.370543	0.299149	0.321882	0.34861	0.306289	0.408779	0.328319	0.629659	0.211085	0.306897	0.357969	0.30317	0.31467	0.310662	0.651042	0.614754	0.412791	0.413978	0.343434	0.334951	0.37619	0.175532	0.717172	0.287879	0.32967	0.490291
6	137519780	T	C	rs3799488	IFNGR1	single nucleotide variant	NM_000416.2(IFNGR1):c.862-4A>G	Familial Atypical Mycobacteriosis, Autosomal Recessive;not specified	Karitiana(HGDP)	0.130839	0.547733	Benign	C	0.144737	0.1136	0.116134	0.118377	0.0196995	0.109662	0.148981	0.259422	0.273847	0.320312	0.255031	0.10484	0.118007	0.116988	0.125288	0.0981214	0.116264	0.0191822	0.104953	0.165517	0.248072	0.107266	0.116429	0.123389	0.0104167	0.0409836	0.145349	0.236559	0.146465	0.208738	0.266667	0.159574	0	0.131313	0.0989011	0.11165
17	80377690	T	G	rs1141463	HEXD	single nucleotide variant	NM_173620.2(HEXD):c.15T>G (p.Thr5=)	not specified	Taa_West(HuOrigin)	0.452342	0.547658	Benign	G	0.289916	0.296667	0.30102	0.301155	0.634715	0.419659	0.298528	0.700302	0.66999	0.671642	0.708872	0.250371	0.293942	0.317395	0.275632	0.26635	0.329017	0.624195	0.390995	0.317241	0.704516	0.238027	0.291591	0.301471	0.614583	0.590164	0.267442	0.790323	0.308081	0.728155	0.661905	0.351064	0.707071	0.29798	0.340659	0.218447
3	48624611	C	T	rs2255532	COL7A1	single nucleotide variant	NM_000094.3(COL7A1):c.3139+12G>A	Dystrophic epidermolysis bullosa;not specified	MbutiPygmy(HGDP)	0.375445	0.547632	Benign	T	0.310924	0.328348	0.27906	0.317744	0.772705	0.193715	0.374451	0.152966	0.117724	0.118421	0.162679	0.446896	0.325607	0.3125	0.352444	0.360566	0.332239	0.772979	0.2109	0.389655	0.149418	0.440346	0.350782	0.363469	0.786458	0.721311	0.290698	0.22043	0.292929	0.18932	0.166667	0.244681	0.893939	0.388889	0.357143	0.378641
15	58837957	A	G	rs6082	LIPC	single nucleotide variant	NM_000236.2(LIPC):c.591A>G (p.Gly197=)	Hepatic lipase deficiency	BTQ(AAGC)	0.202465	0.547535	Benign	G	0.0413223	0.0799382	0.0566185	0.0757586	0.0917928	0.20683	0.0789839	0.417918	0.44814	0.486667	0.409198	0.106373	0.078098	0.0483146	0.0907456	0.103881	0.0971317	0.0919844	0.176887	0.0965517	0.395619	0.113479	0.0753309	0.108856	0.0833333	0.0819672	0.19186	0.311828	0.0757576	0.446602	0.433333	0.12766	0.0959596	0.0707071	0.0659341	0.145631
9	107361452	C	G	rs75081605	OR13C5	single nucleotide variant	NM_001004482.1(OR13C5):c.243G>C (p.Thr81=)	not specified	eas_jpn(gnomAD.exomes)	0.400311	0.54745	Benign	G	0.438679	0.403071	0.286067	0.372986	0.628907	0.613086	0.311724	0.907797	0.926593	0.947761	0.902621	0.448957	0.36999	0.361162	0.341905	0.460157	0.421935	0.632002	0.569307	0.327338	0.897015	0.449821	0.42703	0.458904	0.270833	0.204918	0.337209	0.456989	0.126263	0.461165	0.438095	0.196809	0.368687	0.171717	0.142857	0.140777
3	33038183	A	G	rs12167	GLB1	single nucleotide variant	NM_000404.3(GLB1):c.*354T>C	GM1 gangliosidosis;Morquio syndrome	Karitiana(HGDP)	0.238453	0.547262	Likely_benign	G	NA	NA	NA	NA	NA	NA	NA	NA	NA	NA	NA	NA	NA	NA	NA	NA	NA	0.084271	0.295724	0.189655	0.179768	0.300865	0.277879	0.267956	0.03125	0.0983607	0.19186	0.11828	0.277778	0.262136	0.161905	0.37234	0.0555556	0.378788	0.318681	0.296117
15	45385916	C	T	rs10851420	DUOX2	single nucleotide variant	NM_014080.4(DUOX2):c.*432G>A	Congenital hypothyroidism	YRI(HapMap)	0.196628	0.547214	Likely_benign	T	NA	NA	NA	NA	NA	NA	NA	NA	NA	NA	NA	NA	NA	NA	NA	NA	NA	0.565668	0.123821	0.0689655	0.0429487	0.0725806	0.0751104	0.108656	0.609375	0.57377	0.0406977	0.0322581	0.0505051	0.0436893	0.052381	0.0957447	0.737374	0.0707071	0.0714286	0.0291262
17	59534987	T	G	rs3744447	TBX4	single nucleotide variant	NM_018488.3(TBX4):c.276T>G (p.Ala92=)	Ischiopatellar dysplasia;not specified	Papuan(HuOrigin)	0.202788	0.547212	Benign	G	0.195833	0.159427	0.150313	0.159164	0.115967	0.200816	0.174439	0.332445	0.358753	0.434211	0.324407	0.281238	0.159961	0.146067	0.167114	0.196753	0.190414	0.117505	0.190307	0.144828	0.350515	0.279827	0.171211	0.18232	0.135417	0.0901639	0.19186	0.263441	0.171717	0.378641	0.3	0.180851	0.141414	0.277778	0.164835	0.228155
16	14044717	C	A	rs11075223	ERCC4	single nucleotide variant	NM_005236.2(ERCC4):c.*2513C>A	Xeroderma pigmentosum	Papuan(HGDP)	0.276356	0.547173	Benign	A	NA	NA	NA	NA	NA	NA	NA	NA	NA	NA	NA	NA	NA	NA	NA	NA	NA	0.225966	0.241135	0.385417	0.231959	0.306517	0.334719	0.30037	0.244792	0.204918	0.238372	0.247312	0.323232	0.203883	0.22381	0.276596	0.171717	0.318182	0.346154	0.252427
10	54525849	T	C	rs2099902	MBL2	single nucleotide variant	NM_000242.2(MBL2):c.*2048A>G	Mannose-binding protein deficiency	BiakaPygmy(HGDP)	0.262359	0.547165	Likely_benign	C	NA	NA	NA	NA	NA	NA	NA	NA	NA	NA	NA	NA	NA	NA	NA	NA	NA	0.537581	0.188544	0.172414	0.261349	0.238013	0.232643	0.235622	0.583333	0.434426	0.25	0.252688	0.257576	0.26699	0.27619	0.292553	0.636364	0.232323	0.236264	0.145631
8	48710955	A	G	rs7830743	PRKDC	single nucleotide variant	NM_006904.6(PRKDC):c.10301T>C (p.Ile3434Thr)	not specified	Pima(HuOrigin);Pima(HGDP)	0.131412	0.54716	Benign	G	0.0223214	0.0549766	0.0722927	0.0553587	0.280771	0.324737	0.0935252	0.0688658	0.0746975	0.132812	0.0665335	0.0388044	0.0542297	0.0682171	0.0430957	0.16477	0.0990462	0.275569	0.26533	0.0931034	0.0693196	0.0333717	0.0449715	0.0744485	0.260417	0.254098	0.197674	0.0806452	0.030303	0.0825243	0.047619	0.148936	0.318182	0.0505051	0.032967	0.262136
22	50498389	C	A	rs35730155	MLC1	single nucleotide variant	NM_015166.3(MLC1):c.*1623G>T	Megalencephalic leukoencephalopathy with subcortical cysts	Papuan(HuOrigin)	0.16731	0.546975	Likely_benign	A	NA	NA	NA	NA	NA	NA	NA	NA	NA	NA	NA	NA	NA	NA	NA	NA	NA	0.185373	0.165094	0.15625	0.212629	0.107081	0.135661	0.121324	0.1875	0.221311	0.151163	0.123656	0.156566	0.237864	0.2	0.164894	0.161616	0.111111	0.126374	0.101942
7	143016928	C	T	rs6962852	CLCN1	single nucleotide variant	NM_000083.2(CLCN1):c.261C>T (p.Thr87=)	Myotonia congenita;not specified	MbutiPygmy(HGDP)	0.299637	0.546517	Benign	T	0.219008	0.307402	0.382803	0.317833	0.574188	0.164836	0.380456	0.0440905	0.0366684	0.0328947	0.046173	0.22534	0.314224	0.32397	0.290656	0.314835	0.305737	0.567365	0.204492	0.37931	0.0572716	0.229683	0.295366	0.28453	0.588542	0.483607	0.296512	0.0322581	0.308081	0.0631068	0.047619	0.228723	0.641414	0.282828	0.324176	0.199029
4	126408586	C	T	rs17009825	FAT4	single nucleotide variant	NM_024582.4(FAT4):c.12903C>T (p.Asp4301=)	not specified	MbutiPygmy(HGDP)	0.068948	0.546436	Benign	T	0.0916667	0.0683761	0.0726101	0.0694705	0.133539	0.035673	0.100635	0.00451627	0.000526039	0	0.00561564	0.0810848	0.069001	0.0584708	0.0687333	0.0498301	0.0732702	0.140115	0.0507075	0.12069	0.00577664	0.0852044	0.0677043	0.0762868	0.114583	0.147541	0.0116279	0.016129	0.0757576	0.00485437	0.0047619	0.0478723	0.121212	0.0858586	0.0714286	0.038835
10	73578882	T	C	rs4747203	CDH23;PSAP	single nucleotide variant	NM_002778.3(PSAP):c.1351-14A>G	Atypical Gaucher Disease;CDH23-Related Disorders;Combined saposin deficiency;Galactosylceramide beta-galactosidase deficiency;Metachromatic leukodystrophy;not provided;not specified	Pima(HuOrigin)	0.382138	0.546433	Likely_benign	C	0.220833	0.290477	0.241031	0.265756	0.449963	0.44467	0.238632	0.621906	0.621657	0.671053	0.621452	0.352162	0.276895	0.21639	0.290645	0.267916	0.304718	0.440967	0.438389	0.213793	0.627097	0.347638	0.268171	0.29558	0.463542	0.45082	0.354651	0.526882	0.282828	0.61165	0.585714	0.287234	0.464646	0.333333	0.324176	0.330097
3	179118998	C	T	rs3774225	GNB4	single nucleotide variant	NM_021629.3(GNB4):c.*3G>A	not specified	BTQ(AAGC)	0.203763	0.546237	Benign	T	0.155462	0.169885	0.201799	0.173035	0.130279	0.283052	0.172421	0.220616	0.184737	0.210526	0.230253	0.154626	0.174448	0.184072	0.170611	0.199275	0.195724	0.12997	0.288915	0.210345	0.23518	0.142157	0.167922	0.16636	0.119792	0.147541	0.215116	0.290323	0.166667	0.199029	0.195238	0.18617	0.126263	0.131313	0.175824	0.213592
11	44283925	A	G	rs897004	ALX4	single nucleotide variant	NM_021926.4(ALX4):c.*2479T>C	Enlarged parietal foramina	Karitiana(HuOrigin)	0.328829	0.546171	Benign	G	NA	NA	NA	NA	NA	NA	NA	NA	NA	NA	NA	NA	NA	NA	NA	NA	NA	0.136353	0.502364	0.186207	0.410853	0.319988	0.287979	0.29797	0.171875	0.139344	0.401163	0.467742	0.308081	0.412621	0.4	0.382979	0.0959596	0.313131	0.28022	0.393204
14	20942744	A	G	rs1713420	PNP	single nucleotide variant	NM_000270.3(PNP):c.285+10A>G	Purine-nucleoside phosphorylase deficiency;not specified	MbutiPygmy(HGDP)	0.184615	0.546154	Benign	G	0.161157	0.204719	0.216934	0.201065	0.317824	0.145422	0.185813	0.107481	0.129125	0.177632	0.101012	0.185057	0.206181	0.17603	0.213388	0.157663	0.199478	0.314286	0.15566	0.190972	0.117117	0.18894	0.189465	0.183579	0.291667	0.344262	0.145349	0.129032	0.181818	0.0970874	0.0857143	0.12766	0.338384	0.186869	0.230769	0.116505
22	19751829	C	T	rs2301558	TBX1	single nucleotide variant	NM_080647.1(TBX1):c.664C>T (p.Leu222=)	Cardiovascular phenotype;not provided;not specified	BiakaPygmy(HGDP)	0.287426	0.545907	Benign	T	0.204348	0.238483	0.267132	0.241397	0.584767	0.274865	0.255412	0.116854	0.102987	0.112676	0.120579	0.238007	0.239289	0.28299	0.221792	0.364611	0.282324	0.581087	0.274882	0.248276	0.119201	0.226094	0.234247	0.26107	0.614583	0.590164	0.372093	0.139785	0.176768	0.145631	0.1	0.319149	0.60101	0.181818	0.203297	0.315534
4	2826912	C	G	rs16843413	SH3BP2	single nucleotide variant	NM_003023.4(SH3BP2):c.417C>G (p.Pro139=)	Fibrous dysplasia of jaw;not specified	BTQ(AAGC)	0.121163	0.545504	Benign	G	0.0491071	0.0663168	0.077865	0.0640166	0.259953	0.141096	0.0629139	0.0599228	0.060253	0.0392157	0.0600211	0.0170148	0.0628225	0.0565903	0.0429987	0.112242	0.0864246	0.264292	0.137972	0.0689655	0.0532734	0.0175691	0.0602026	0.058011	0.3125	0.204918	0.127907	0.0752688	0.0353535	0.0728155	0.0714286	0.0851064	0.237374	0.020202	0.0659341	0.126214
17	73938957	C	T	rs2608880	ACOX1	single nucleotide variant	NM_004035.6(ACOX1):c.*3872G>A	Pseudoneonatal adrenoleukodystrophy	MSL(1KG_phase3)	0.378375	0.545155	Benign	T	NA	0.325526	0.311111	0.316327	0.888889	NA	0.166667	0	NA	NA	0	0.28125	0.323882	0.5	0.307692	NA	0.464286	0.790976	0.29669	0.393103	0.196382	0.24121	0.323667	0.341912	0.739583	0.745902	0.27907	0.16129	0.348485	0.257282	0.195238	0.382979	0.858586	0.191919	0.357143	0.26699
5	37173930	A	C	rs10076911	CPLANE1	single nucleotide variant	NM_023073.3(CPLANE1):c.6098T>G (p.Phe2033Cys)	Joubert syndrome;Joubert syndrome 17;not specified	MbutiPygmy(HGDP)	0.147302	0.545006	Benign	C	0.0991736	0.102043	0.139391	0.110042	0.311024	0.18784	0.165873	0.0786126	0.0631221	0.0460526	0.083056	0.129712	0.107993	0.147191	0.0974284	0.103802	0.130832	0.311034	0.183215	0.17931	0.0739075	0.127733	0.110419	0.131434	0.328125	0.245902	0.145349	0.193548	0.0757576	0.0679612	0.0666667	0.148936	0.348485	0.10101	0.0989011	0.131068
8	145001031	T	C	rs55895668	PLEC	single nucleotide variant	NM_000445.4(PLEC):c.4046A>G (p.His1349Arg)	not specified	YRI(1KG_phase3)	0.390575	0.54461	Benign	C	0.344538	0.432116	0.460021	0.423019	0.834564	0.282659	0.470588	0.14533	0.155398	0.149254	0.142551	0.406416	0.424777	0.458145	0.396981	0.358814	0.418432	0.825702	0.364387	0.465517	0.138065	0.395617	0.409866	0.425551	0.869792	0.795082	0.343023	0.123656	0.434343	0.145631	0.157143	0.430851	0.934343	0.388889	0.417582	0.354369
5	251469	G	A	rs1139449	SDHA	single nucleotide variant	NM_004168.3(SDHA):c.1680G>A (p.Thr560=)	Hereditary cancer-predisposing syndrome;Leigh syndrome;Mitochondrial complex II deficiency;Pheochromocytoma;not specified	GWD(1KG_phase3)	0.194333	0.544605	Likely_benign	A	0.0769231	0.130055	0.133846	0.120913	0.528562	0.182193	0.159892	0.058563	0.0529906	0.0131579	0.0605278	0.0842718	0.123084	0.109886	0.111363	0.0885191	0.144592	0.529385	0.178487	0.15625	0.048906	0.0834292	0.112295	0.130314	0.578125	0.590164	0.116279	0.0483871	0.111111	0.0631068	0.052381	0.223404	0.585859	0.0757576	0.131868	0.0582524
8	144996029	A	G	rs7833924	PLEC	single nucleotide variant	NM_000445.4(PLEC):c.8041T>C (p.Ser2681Pro)	not specified	ESN(1KG_phase3)	0.389839	0.544504	Benign	G	0.331522	0.431636	0.456943	0.421791	0.834437	0.28192	0.471964	0.143691	0.154955	0.1625	0.140457	0.40655	0.422844	0.453797	0.394608	0.359372	0.414879	0.825937	0.365248	0.465278	0.140103	0.396373	0.410505	0.428835	0.869792	0.795082	0.343023	0.11828	0.439394	0.145631	0.157143	0.430851	0.934343	0.388889	0.417582	0.354369
15	75189591	G	A	rs12593975	MPI	single nucleotide variant	NM_002435.2(MPI):c.1053+31G>A	not specified	BTQ(AAGC)	0.205857	0.544143	Benign	A	0.0252101	0.0499259	0.0592748	0.0524899	0.0641754	0.191504	0.0660828	0.360285	0.356731	0.326667	0.361578	0.103009	0.0528581	0.0570143	0.0549981	0.338092	0.116601	0.0574223	0.188679	0.0517241	0.33871	0.109285	0.0567091	0.101289	0.03125	0.0901639	0.406977	0.370968	0.0555556	0.349515	0.357143	0.0638298	0.0555556	0.0909091	0.0494505	0.402913
22	44342325	C	T	rs2294919	PNPLA3	single nucleotide variant	NM_025225.2(PNPLA3):c.*63C>T	Susceptibility to Nonalcoholic Fatty Liver Disease	BTQ(AAGC)	0.247603	0.544064	Likely_benign	T	NA	NA	NA	NA	NA	NA	NA	NA	NA	NA	NA	NA	NA	NA	NA	NA	NA	0.150149	0.171801	0.2	0.339768	0.210541	0.242623	0.243094	0.140625	0.196721	0.261628	0.456989	0.292929	0.368932	0.3	0.234043	0.0959596	0.207071	0.291209	0.262136
4	100510859	T	C	rs991811	MTTP	single nucleotide variant	NM_000253.3(MTTP):c.453T>C (p.Gly151=)	Abetalipoproteinaemia;not specified	BantuKenya(HGDP)	0.456051	0.543949	Benign	C	0.285124	0.355969	0.415216	0.356464	0.768715	0.264777	0.578702	0.648199	0.710831	0.671053	0.631433	0.207931	0.353302	0.377436	0.316173	0.418393	0.390013	0.760875	0.330569	0.565517	0.610682	0.208405	0.337695	0.311808	0.776042	0.721311	0.465116	0.655914	0.262626	0.718447	0.628571	0.351064	0.853535	0.176768	0.302198	0.466019
5	125887715	T	G	rs12514417	ALDH7A1	single nucleotide variant	NM_001182.4(ALDH7A1):c.1315A>C (p.Lys439Gln)	Pyridoxine-dependent epilepsy;Seizures;not specified	Koryaks(Estonian_Biocentre)	0.122855	0.543811	Likely_benign	G	0.0991736	0.0932513	0.0733345	0.0882924	0.0454825	0.241063	0.0767779	0.142312	0.0954138	0.131579	0.154775	0.133167	0.0908338	0.0802099	0.0986434	0.078894	0.101568	0.0401149	0.198582	0.0689655	0.151476	0.129246	0.0945648	0.100184	0.0208333	0.0409836	0.0872093	0.182796	0.0959596	0.121359	0.195238	0.0851064	0.0353535	0.126263	0.104396	0.0533981
17	59940633	C	T	rs4988340	BRIP1	single nucleotide variant	NM_032043.2(BRIP1):c.-31+12G>A	Fanconi anemia;Neoplasm of the breast;not specified	Karitiana(HGDP)	0.313431	0.543712	Likely_benign	T	NA	NA	NA	NA	NA	NA	NA	NA	NA	NA	NA	NA	NA	NA	NA	NA	NA	0.117308	0.421801	0.263889	0.258687	0.236872	0.28277	0.323148	0.0729167	0.180328	0.5	0.387097	0.242424	0.242718	0.204762	0.281915	0.0606061	0.257576	0.362637	0.601942
3	180365956	G	A	rs6769457	CCDC39	single nucleotide variant	NM_181426.2(CCDC39):c.1359C>T (p.Ser453=)	Ciliary dyskinesia;Ciliary dyskinesia, primary, 14;not specified	ESN(1KG_phase3)	0.264592	0.543489	Benign	A	0.229167	0.226176	0.251677	0.232544	0.654627	0.230873	0.191277	0.00330606	0.000263158	0	0.00416906	0.236837	0.229275	0.221719	0.221514	0.200354	0.247159	0.642066	0.240566	0.21875	0.00513479	0.241359	0.229104	0.277675	0.697917	0.606557	0.151163	0.00537634	0.247475	0	0	0.308511	0.808081	0.247475	0.203297	0.242718
2	179444939	C	T	rs2303838	TTN	single nucleotide variant	NM_133378.4(TTN):c.59371G>A (p.Val19791Ile)	Cardiovascular phenotype;Dilated Cardiomyopathy, Dominant;Distal myopathy Markesbery-Griggs type;Hereditary myopathy with early respiratory failure;Hypertrophic cardiomyopathy;Limb-Girdle Muscular Dystrophy, Recessive;Myopathy, early-onset, with fatal cardiomyopathy;not specified	Papuan(HGDP)	0.30956	0.543381	Likely_benign	T	0.175	0.169409	0.203573	0.176129	0.335102	0.19229	0.236837	0.610603	0.562535	0.606061	0.623069	0.172835	0.173674	0.196617	0.162152	0.326264	0.216839	0.332374	0.215802	0.173611	0.604058	0.162536	0.178066	0.216912	0.286458	0.295082	0.412791	0.731183	0.136364	0.57767	0.633333	0.234043	0.409091	0.181818	0.181319	0.300971
6	52303361	G	A	rs3804505	EFHC1	single nucleotide variant	NM_018100.3(EFHC1):c.545G>A (p.Arg182His)	Juvenile myoclonic epilepsy;Myoclonic epilepsy, juvenile 1;not specified	Papuan(HuOrigin)	0.063864	0.543278	Benign	A	0.0625	0.0603169	0.04654	0.0569653	0.0103023	0.0533905	0.0481437	0.0821009	0.0712415	0.0460526	0.0853557	0.0870007	0.0598618	0.0566392	0.0687108	0.0686985	0.057862	0.0132093	0.0554245	0.0344828	0.0823681	0.0915371	0.0656939	0.0735294	0	0.0245902	0.0697674	0.0860215	0.030303	0.0679612	0.0952381	0.037234	0	0.0555556	0.0824176	0.0776699
11	46940118	G	A	rs111383894	LRP4	single nucleotide variant	NM_002334.3(LRP4):c.-188C>T	Syndactyly Cenani Lenz type	GWD(1KG_phase3)	0.098809	0.542784	Benign	A	NA	NA	NA	NA	NA	NA	NA	NA	NA	NA	NA	NA	NA	NA	NA	NA	NA	0.471677	0.0344828	0	0	0	0.000598892	0.0396825	0.5	0.409836	0	0	0	0	0	0.0585106	0.621212	0	0	0
3	15492150	C	T	rs3846128	COLQ	single nucleotide variant	NM_005677.3(COLQ):c.*1001G>A	Congenital Myasthenic Syndrome, Recessive	Papuan(HuOrigin)	0.385811	0.54276	Benign	T	NA	NA	NA	NA	NA	NA	NA	NA	NA	NA	NA	NA	NA	NA	NA	NA	NA	0.337791	0.361702	0.444828	0.503222	0.322107	0.374789	0.351476	0.317708	0.360656	0.372093	0.548387	0.353535	0.412621	0.5	0.324468	0.333333	0.378788	0.406593	0.34466
4	100512412	T	C	rs982424	MTTP	single nucleotide variant	NM_000253.3(MTTP):c.522T>C (p.Cys174=)	Abetalipoproteinaemia;not specified	Papuan(HGDP)	0.134143	0.542327	Benign	C	0.0371901	0.0663406	0.0540564	0.0597931	0.250492	0.0687681	0.0557872	0.192692	0.243973	0.263158	0.178383	0.0450051	0.0622722	0.0607196	0.0626531	0.113319	0.0734574	0.249253	0.071934	0.062069	0.164736	0.0446429	0.0568521	0.0707721	0.244792	0.221311	0.203488	0.225806	0.0454545	0.281553	0.180952	0.12766	0.252525	0.0353535	0.0494505	0.135922
6	158569886	T	C	rs9356399	SERAC1	single nucleotide variant	NM_032861.3(SERAC1):c.355+11A>G	not specified	Karitiana(HGDP)	0.457856	0.542144	Benign	C	0.55	0.477214	0.514688	0.487444	0.261851	0.667087	0.526679	0.420943	0.527998	0.573333	0.389997	0.455505	0.477431	0.524812	0.444057	0.439349	0.499327	0.264179	0.620567	0.524138	0.409499	0.463134	0.48694	0.476059	0.192708	0.286885	0.389535	0.376344	0.464646	0.441748	0.404762	0.569149	0.171717	0.444444	0.532967	0.383495
12	121435427	G	A	rs2464196	HNF1A	single nucleotide variant	NM_000545.6(HNF1A):c.1460G>A (p.Ser487Asn)	Maturity onset diabetes mellitus in young;not provided;not specified	Papuan(HGDP)	0.370086	0.541679	Benign	A	0.334746	0.29466	0.334014	0.307522	0.119413	0.371112	0.46197	0.486206	0.553619	0.626667	0.466732	0.312394	0.306291	0.359166	0.306154	0.416606	0.337649	0.122044	0.353774	0.468966	0.481959	0.314154	0.303859	0.335175	0.09375	0.180328	0.395349	0.349462	0.29798	0.466019	0.47619	0.361702	0.151515	0.277778	0.32967	0.441748
6	110106234	A	G	rs10499054	FIG4	single nucleotide variant	NM_014845.5(FIG4):c.1948+3A>G	Amyotrophic Lateral Sclerosis, Dominant;Amyotrophic lateral sclerosis type 11;Charcot-Marie-Tooth disease, type 4J;Charcot-Marie-Tooth disease, type IV;not specified	Orcadians(HuOrigin)	0.420011	0.541527	Benign	G	0.65	0.682938	0.641787	0.670804	0.188401	0.438383	0.55456	0.331571	0.325289	0.315789	0.333403	0.55583	0.671887	0.641304	0.671962	0.356909	0.573183	0.191298	0.482227	0.576389	0.343669	0.551993	0.657392	0.570772	0.171875	0.172131	0.348837	0.311828	0.691919	0.339806	0.352381	0.505319	0.0606061	0.535354	0.752747	0.354369
7	148106477	C	G	rs77025884	CNTNAP2	single nucleotide variant	NM_014141.5(CNTNAP2):c.3716-6C>G	Pitt-Hopkins-like syndrome 1;not specified	SSIP(SGVP)	0.069702	0.541409	Benign	G	0.0833333	0.105526	0.0632911	0.0572896	0.123321	0.0366374	0.0526992	0.0557992	0.0359431	0.00961538	0.0622473	0.0738406	0.0762865	0.022449	0.0687345	0.110406	0.0788635	0.000116117	0	0.00793651	0	0	0.00226711	0.00484496	NA	NA	NA	NA	NA	NA	NA	NA	NA	NA	NA	NA
12	13764774	G	A	rs1805482	GRIN2B	single nucleotide variant	NM_000834.4(GRIN2B):c.1665C>T (p.Ser555=)	Intellectual Disability, Dominant;Mental retardation, autosomal dominant 6;Neurodevelopmental;not provided;not specified	Pima(HGDP)	0.208963	0.541037	Likely_benign	A	0.210744	0.34406	0.345799	0.329016	0.160985	0.390765	0.301211	0.0122362	0.0207132	0.0131579	0.00998475	0.184313	0.330814	0.297378	0.309506	0.174343	0.299804	0.170267	0.392435	0.313793	0.0102564	0.18365	0.301273	0.274401	0.182292	0.229508	0.0813953	0.00537634	0.378788	0.0242718	0	0.441489	0.126263	0.181818	0.379121	0.194175
15	49103244	T	C	rs2304546	CEP152	single nucleotide variant	NM_014985.3(CEP152):c.-94A>G	Primary Microcephaly, Recessive;Seckel syndrome	Maya(HGDP)	0.173316	0.54097	Benign	C	NA	NA	NA	NA	NA	NA	NA	NA	NA	NA	NA	NA	NA	NA	NA	NA	NA	0.144383	0.339286	0.0758621	0.279846	0.0880322	0.0763492	0.119004	0.177083	0.155738	0.226744	0.301075	0.10101	0.325243	0.290476	0.18617	0.166667	0.030303	0.0879121	0.184466
4	2829409	G	A	rs28516876	SH3BP2	single nucleotide variant	NM_003023.4(SH3BP2):c.586+8G>A	Fibrous dysplasia of jaw;not specified	BTQ(AAGC)	0.125947	0.54072	Benign	A	0.0509259	0.0683514	0.0960532	0.0687204	0.293584	0.147725	0.0645492	0.065069	0.0677857	0.0581395	0.0643501	0.01813	0.0694041	0.0667634	0.0623866	0.117194	0.0923554	0.276152	0.137972	0.0689655	0.0545571	0.0178571	0.0601557	0.0598527	0.3125	0.229508	0.127907	0.0752688	0.0353535	0.0728155	0.0761905	0.0851064	0.277778	0.020202	0.0659341	0.126214
5	226160	A	C	rs6555055	SDHA	single nucleotide variant	NM_004168.3(SDHA):c.619A>C (p.Arg207=)	Hereditary cancer-predisposing syndrome;Leigh syndrome;Mitochondrial complex II deficiency;Pheochromocytoma;not specified	GWD(1KG_phase3)	0.198425	0.540513	Likely_benign	C	0.075	0.132554	0.143081	0.126059	0.545219	0.189753	0.163525	0.0606242	0.053693	0.0131579	0.0629594	0.0859902	0.128014	0.112444	0.118471	0.0905141	0.150147	0.528604	0.181604	0.158621	0.0487805	0.0834292	0.11264	0.133517	0.578125	0.590164	0.116279	0.0483871	0.111111	0.0631068	0.052381	0.223404	0.580808	0.0757576	0.131868	0.0582524
5	177423144	T	G	rs13187293	PROP1	single nucleotide variant	NM_006261.4(PROP1):c.-210A>C	Combined Pituitary Hormone Deficiency, Recessive	Papuan(HuOrigin)	0.352708	0.540149	Likely_benign	G	NA	NA	NA	NA	NA	NA	NA	NA	NA	NA	NA	NA	NA	NA	NA	NA	NA	0.252879	0.392435	0.368966	0.432345	0.298847	0.285937	0.305147	0.208333	0.303279	0.319767	0.397849	0.308081	0.456311	0.419048	0.37766	0.242424	0.287879	0.313187	0.276699
10	50665928	C	T	rs3750751	ERCC6	single nucleotide variant	NM_000124.3(ERCC6):c.*933G>A	Cerebrooculofacioskeletal Syndrome;Cockayne syndrome;Macular degeneration	Eskimo(HuOrigin)	0.141878	0.53994	Benign	T	NA	NA	NA	NA	NA	NA	NA	NA	NA	NA	NA	NA	NA	NA	NA	NA	NA	0.0419637	0.153302	0.0655172	0.154194	0.0691244	0.0828794	0.102022	0.0208333	0.0491803	0.238372	0.11828	0.111111	0.160194	0.142857	0.12234	0.0252525	0.0757576	0.10989	0.247573
12	40645257	C	A	rs7955902	LRRK2	single nucleotide variant	NM_198578.3(LRRK2):c.1102-10C>A	Parkinson disease 8, autosomal dominant	Onge(HuOrigin)	0.323942	0.539694	Benign	A	0.348739	0.390277	0.33638	0.380941	0.206516	0.222449	0.373972	0.344879	0.271529	0.333333	0.364226	0.390254	0.381292	0.378707	0.387266	0.438787	0.352352	0.215867	0.239387	0.347222	0.3509	0.378127	0.397995	0.353974	0.203125	0.213115	0.430233	0.387097	0.388889	0.38835	0.328571	0.255319	0.222222	0.363636	0.445055	0.446602
5	70840233	C	T	rs182190	BDP1	single nucleotide variant	NM_018429.2(BDP1):c.6462C>T (p.Leu2154=)	not specified	Papuan(HuOrigin)	0.388911	0.53966	Benign	T	0.429167	0.460868	0.439474	0.446502	0.367914	0.244378	0.459825	0.361071	0.350735	0.38806	0.36363	0.499954	0.454726	0.445236	0.462417	0.486464	0.440835	0.367126	0.253555	0.493103	0.353093	0.486463	0.454179	0.434622	0.348958	0.401639	0.453488	0.365591	0.494949	0.330097	0.395238	0.382979	0.378788	0.5	0.5	0.436893
17	465775	G	A	rs2075443	VPS53	single nucleotide variant	NM_001128159.2(VPS53):c.1524C>T (p.Tyr508=)	not specified	Papuan(HGDP)	0.284343	0.539187	Benign	A	0.268595	0.228944	0.240734	0.23422	0.554688	0.440193	0.189262	0.197368	0.181509	0.197368	0.201567	0.193957	0.230576	0.270412	0.219998	0.272849	0.262875	0.552194	0.388626	0.17931	0.192407	0.187212	0.228402	0.260148	0.5625	0.54918	0.203488	0.263441	0.186869	0.169903	0.209524	0.430851	0.661616	0.171717	0.274725	0.213592
12	6127891	C	A	rs1800385	VWF	single nucleotide variant	NM_000552.4(VWF):c.4693G>T (p.Val1565Leu)	not specified;von Willebrand disorder	Karitiana(HuOrigin)	0.169575	0.538758	Likely_benign	A	0.0875	0.0860907	0.0832026	0.0830901	0.0203503	0.371144	0.0787801	0.385325	0.399422	0.32	0.382271	0.0426761	0.0845843	0.0878123	0.0841713	0.205036	0.119281	0.0232612	0.336085	0.0862069	0.372587	0.0394358	0.0844915	0.103131	0.015625	0.0327869	0.284884	0.33871	0.0808081	0.354369	0.352381	0.234043	0	0.0454545	0.0989011	0.252427
1	6526633	G	A	rs3007418	PLEKHG5	single nucleotide variant	NM_020631.4(PLEKHG5):c.*990C>T	Distal spinal muscular atrophy	GWD(1KG_phase3)	0.13833	0.538661	Benign	A	NA	NA	NA	NA	NA	NA	NA	NA	NA	NA	NA	NA	NA	NA	NA	NA	NA	0.502424	0.0853081	0.111111	0	0.0264824	0.0611342	0.0873162	0.515625	0.409836	0.0755814	0	0.0505051	0	0	0.101064	0.59596	0.0252525	0.0494505	0.165049
15	43893072	G	A	rs3097773	STRC	single nucleotide variant	NM_153700.2(STRC):c.4842C>T (p.Phe1614=)	not specified	MSL(1KG_phase3)	0.320506	0.538317	Benign	A	0.0950413	0.0970733	0.139687	0.107083	0.697549	0.215968	0.194262	0.439922	0.497117	0.355263	0.425666	0.0752912	0.101718	0.109738	0.0854004	0.199869	0.15362	0.687325	0.221564	0.213793	0.423377	0.0738178	0.0960761	0.137803	0.760417	0.688525	0.267442	0.365591	0.0707071	0.524272	0.447619	0.234043	0.792929	0.0454545	0.120879	0.213592
4	114276884	A	G	rs3733615	ANK2	single nucleotide variant	NM_001148.4(ANK2):c.7110A>G (p.Gln2370=)	Cardiac arrhythmia, ankyrin B-related;Cardiovascular phenotype;Long QT syndrome;not specified	LWK(1KG_phase3)	0.234531	0.538197	Likely_benign	G	0.14876	0.152382	0.197256	0.162628	0.574172	0.172387	0.204618	0.12015	0.143575	0.0986842	0.114232	0.125335	0.157745	0.197151	0.139327	0.147455	0.195645	0.559617	0.175708	0.17931	0.13543	0.120322	0.161087	0.172192	0.536458	0.508197	0.162791	0.123656	0.176768	0.135922	0.12381	0.175532	0.616162	0.146465	0.120879	0.106796
4	15482360	C	T	rs1861050	CC2D2A	single nucleotide variant	NM_001080522.2(CC2D2A):c.156C>T (p.Ser52=)	Joubert syndrome;Meckel-Gruber syndrome;not specified	Maya(HuOrigin)	0.100828	0.538061	Likely_benign	T	0.0508475	0.0358101	0.0263109	0.036118	0.10953	0.263685	0.00856509	0.152693	0.160423	0.174242	0.150421	0.0552696	0.0366081	0.0265957	0.0437658	0.0684647	0.0707801	0.105827	0.242925	0.00689655	0.152314	0.0588235	0.0397248	0.0634191	0.109375	0.106557	0.110465	0.177419	0.0353535	0.145631	0.180952	0.228723	0.121212	0.0454545	0.0494505	0.0436893
21	47786524	A	G	rs2839227	PCNT	single nucleotide variant	NM_006031.5(PCNT):c.2635A>G (p.Thr879Ala)	Microcephalic Osteodysplastic Primordial Dwarfism;not specified	BantuKenya(HGDP)	0.280236	0.537946	Benign	G	0.173729	0.129647	0.150845	0.14134	0.518475	0.19926	0.127264	0.187398	0.219749	0.243421	0.178245	0.18299	0.13772	0.166918	0.13721	0.290983	0.161501	0.509551	0.189858	0.1	0.184585	0.169545	0.145768	0.180812	0.515625	0.442623	0.360465	0.193548	0.141414	0.218447	0.152381	0.196809	0.636364	0.186869	0.137363	0.31068
9	368030	T	C	rs10972587	DOCK8	single nucleotide variant	NM_203447.3(DOCK8):c.1692T>C (p.Tyr564=)	Hyper-IgE syndrome;not specified	AA(HuOrigin)	0.087154	0.537846	Benign	C	0.0833333	0.03666	0.0258396	0.0412951	0.366355	0.0449971	0.0618178	0.000815838	0.00314961	0	0.000207987	0.026007	0.0382239	0.0329835	0.0426778	0.0281226	0.0415987	0.365424	0.0484634	0.062069	0	0.023015	0.0407595	0.0551471	0.411458	0.327869	0.0406977	0	0.0505051	0	0	0.0691489	0.444444	0.0252525	0.0384615	0.00970874
5	251541	A	G	rs13070	SDHA	single nucleotide variant	NM_004168.3(SDHA):c.1752A>G (p.Ala584=)	Hereditary cancer-predisposing syndrome;Leigh syndrome;Mitochondrial complex II deficiency;Pheochromocytoma;not specified	GWD(1KG_phase3)	0.201571	0.537367	Likely_benign	G	0.0791667	0.131796	0.140835	0.125097	0.545119	0.188084	0.162756	0.0602134	0.053955	0.0131579	0.0623698	0.0857764	0.127066	0.111694	0.117751	0.0901806	0.148737	0.530069	0.182783	0.159722	0.0488432	0.0834292	0.112828	0.133764	0.578125	0.590164	0.116279	0.0483871	0.111111	0.0631068	0.052381	0.223404	0.585859	0.0757576	0.131868	0.0582524
6	123539609	C	T	rs361509	TRDN	single nucleotide variant	NM_006073.3(TRDN):c.*137G>A	Catecholaminergic polymorphic ventricular tachycardia	Papuan(HuOrigin)	0.427255	0.53703	Benign	T	NA	NA	NA	NA	NA	NA	NA	NA	NA	NA	NA	NA	NA	NA	NA	NA	NA	0.350023	0.605201	0.527778	0.316819	0.364055	0.452703	0.40573	0.395833	0.303279	0.30814	0.33871	0.414141	0.398058	0.3	0.547872	0.333333	0.343434	0.467033	0.291262
14	65267469	T	C	rs230703	SPTB	single nucleotide variant	NM_001355436.2(SPTB):c.876+5A>G	Elliptocytosis;Spherocytosis, Dominant;not specified	Taa_West(HuOrigin)	0.338056	0.536944	Likely_benign	C	0.280992	0.302551	0.351269	0.310779	0.538717	0.231704	0.370907	0.133206	0.131813	0.164474	0.133245	0.301046	0.306406	0.348986	0.283658	0.429066	0.326923	0.527426	0.247045	0.375862	0.133205	0.300576	0.296662	0.310536	0.520833	0.57377	0.389535	0.155914	0.323232	0.150485	0.133333	0.276596	0.661616	0.30303	0.258242	0.446602
16	53634295	C	T	rs1946155	RPGRIP1L	single nucleotide variant	NM_015272.4(RPGRIP1L):c.*1693G>A	Joubert syndrome;Meckel-Gruber syndrome;Nephronophthisis	Papuan(HGDP)	0.404316	0.536861	Likely_benign	T	NA	NA	NA	NA	NA	NA	NA	NA	NA	NA	NA	NA	NA	NA	NA	NA	NA	0.600784	0.269504	0.334483	0.586252	0.171947	0.278233	0.295203	0.708333	0.557377	0.47093	0.666667	0.272727	0.529126	0.590476	0.271277	0.636364	0.222222	0.302198	0.364078
17	42989088	C	T	rs2289681	GFAP	single nucleotide variant	NM_002055.4(GFAP):c.858G>A (p.Arg286=)	Alexander Disease;not provided	Karitiana(HGDP)	0.106452	0.536406	Benign	T	0.0869565	0.126181	0.0746583	0.113035	0.239666	0.0691113	0.0798244	0.143215	0.154531	0.104167	0.140603	0.0646785	0.117394	0.0671982	0.132608	0.0877835	0.0905512	0.239945	0.0872642	0.0896552	0.139744	0.0628242	0.113743	0.104779	0.197917	0.327869	0.0697674	0.177419	0.161616	0.101942	0.157143	0.0851064	0.257576	0.0808081	0.126374	0.092233
11	32449486	C	T	rs1799933	WT1	single nucleotide variant	NM_024426.5(WT1):c.887+16G>A	not provided;not specified	MSL(1KG_phase3)	0.193073	0.536339	Benign	T	0.129808	0.139669	0.169622	0.146095	0.594658	0.0918899	0.216133	0.0263878	0.0307087	0.142857	0.0244653	0.0815086	0.142739	0.167542	0.130159	0.219063	0.159236	0.582758	0.10967	0.172414	0.0250965	0.0769452	0.130486	0.148897	0.666667	0.508197	0.22093	0.0376344	0.131313	0.00970874	0.0238095	0.12766	0.70202	0.0656566	0.137363	0.169903
12	57637593	G	A	rs3204635	STAC3	single nucleotide variant	NM_145064.2(STAC3):c.*2C>T	not specified	Dharkars(Estonian_Biocentre)	0.255373	0.536294	Benign	A	0.295833	0.275914	0.210286	0.268478	0.178567	0.138264	0.21246	0.261816	0.260367	0.253333	0.262289	0.350461	0.272286	0.240909	0.301321	0.438655	0.254516	0.174603	0.152123	0.20979	0.262548	0.347174	0.303056	0.298713	0.135417	0.204918	0.459302	0.284946	0.262626	0.203883	0.204762	0.297872	0.166667	0.318182	0.236264	0.446602
17	41206852	T	C	rs8176287	BRCA1	single nucleotide variant	NM_007294.3(BRCA1):c.5277+2217A>G	Breast-ovarian cancer, familial 1	YRI(1KG_phase3)	0.111868	0.53628	Benign	C	NA	NA	NA	NA	NA	NA	NA	NA	NA	NA	NA	NA	NA	NA	NA	NA	NA	0.510502	0.0259434	0.0137931	0	0.00231348	0.00789508	0.0378229	0.494792	0.491803	0.0232558	0	0.00505051	0.00485437	0	0.0744681	0.636364	0	0.00549451	0.0291262
22	32482321	T	G	rs5998233	SLC5A1	single nucleotide variant	NM_000343.3(SLC5A1):c.1129+7T>G	Congenital glucose-galactose malabsorption;not specified	YRI(HapMap)	0.394841	0.536194	Benign	G	0.367769	0.383022	0.330809	0.364024	0.827323	0.273758	0.38557	0.163657	0.151023	0.171053	0.166921	0.273702	0.367328	0.350562	0.363668	0.371823	0.344372	0.818004	0.2891	0.431034	0.164295	0.281556	0.367383	0.371534	0.833333	0.770492	0.372093	0.182796	0.363636	0.140777	0.138095	0.351064	0.873737	0.318182	0.395604	0.42233
10	123239112	G	A	rs1047057	FGFR2	single nucleotide variant	NM_000141.4(FGFR2):c.*259C>T	Acrocephalosyndactyly type I;Craniosynostosis;Crouzon syndrome;Cutis Gyrata syndrome of Beare and Stevenson;Isolated coronal synostosis;Jackson-Weiss syndrome;Levy-Hollister syndrome;Pfeiffer syndrome;Saethre-Chotzen syndrome;not provided;not specified	Karitiana(HGDP);Maya(HGDP);Pima(HGDP)	0.463815	0.536185	Benign	A	0.504505	0.562404	0.526183	0.550304	0.14689	0.749818	0.562838	0.379893	0.452457	0.333333	0.365725	0.501304	0.557313	0.551619	0.569507	0.597283	0.558918	0.142775	0.712085	0.541667	0.369845	0.489331	0.544204	0.502757	0.125	0.204918	0.587209	0.27957	0.550505	0.417476	0.347619	0.643617	0.0808081	0.5	0.532967	0.679612
2	127816695	C	T	rs2228955	BIN1	single nucleotide variant	NM_139343.2(BIN1):c.894G>A (p.Ser298=)	Autosomal recessive centronuclear myopathy;not specified	Onge(HuOrigin)	0.100454	0.535909	Likely_benign	T	0.0272727	0.0173968	0.0280503	0.0227861	0.0149676	0.190313	0.0384699	0.141129	0.123188	0.104167	0.146591	0.0853246	0.0218794	0.0229953	0.0276135	0.115214	0.0467925	0.0180222	0.141844	0.0625	0.149225	0.093894	0.0223336	0.0387454	0.015625	0.0245902	0.145349	0.134409	0.0353535	0.131068	0.190476	0.138298	0.010101	0.0707071	0.0274725	0.121359
16	8875529	G	T	rs2270288	ABAT	single nucleotide variant	NM_020686.5(ABAT):c.*242G>T	Gamma-aminobutyric acid transaminase deficiency	Nganasans(HuOrigin)	0.373713	0.535378	Benign	T	NA	NA	NA	NA	NA	NA	NA	NA	NA	NA	NA	NA	NA	NA	NA	NA	NA	0.307888	0.361702	0.531034	0.388243	0.462161	0.448905	0.46488	0.296875	0.254098	0.406977	0.387097	0.5	0.461165	0.414286	0.382979	0.262626	0.525253	0.478022	0.427184
3	129247551	A	G	rs7984	RHO	single nucleotide variant	NM_000539.3(RHO):c.-26A>G	Congenital Stationary Night Blindness, Dominant;Retinitis Pigmentosa, Dominant/Recessive;not specified	ESN(1KG_phase3)	0.444441	0.535357	Benign	G	0.12069	0.147975	0.218914	0.159804	0.837503	0.277243	0.276222	0.637029	0.546146	0.532895	0.662298	0.0667997	0.152578	0.188021	0.118991	0.379423	0.243363	0.829912	0.280806	0.265517	0.661935	0.0697406	0.137445	0.186581	0.916667	0.754098	0.476744	0.688172	0.156566	0.587379	0.666667	0.308511	0.979798	0.0707071	0.137363	0.364078
3	53845295	C	T	rs10154841	CACNA1D	single nucleotide variant	NM_000720.3(CACNA1D):c.6408C>T (p.Asn2136=)	not specified	ESN(1KG_phase3)	0.207113	0.535311	Benign	T	0.0578512	0.0921053	0.0958225	0.0826494	0.595124	0.128007	0.136418	0.139898	0.157412	0.184211	0.134794	0.0877884	0.08631	0.0868914	0.0773117	0.102973	0.1197	0.579935	0.130896	0.124138	0.135604	0.0828539	0.0803374	0.111624	0.651042	0.516393	0.139535	0.188172	0.106061	0.126214	0.0952381	0.159574	0.742424	0.10101	0.10989	0.092233
4	114260492	G	T	rs2272231	ANK2	single nucleotide variant	NM_001148.4(ANK2):c.3893+14G>T	Long QT syndrome;not specified	Xuun(HuOrigin)	0.195705	0.535065	Likely_benign	T	0.0950413	0.10028	0.105446	0.101763	0.4752	0.134876	0.0987495	0.119501	0.142518	0.0986842	0.113662	0.0615713	0.0999437	0.104198	0.0944342	0.125882	0.129122	0.466774	0.133886	0.0655172	0.133676	0.0647668	0.105007	0.116943	0.421875	0.360656	0.151163	0.123656	0.10101	0.131068	0.128571	0.143617	0.484848	0.0707071	0.0989011	0.092233
2	238322579	A	G	rs2291794	COL6A3	single nucleotide variant	NM_004369.3(COL6A3):c.-31+17T>C	not specified	Papuan(HGDP)	0.288555	0.534974	Benign	G	NA	NA	NA	NA	NA	NA	NA	NA	NA	NA	NA	NA	NA	NA	NA	NA	NA	0.180313	0.373821	0.201389	0.244859	0.253456	0.21219	0.25878	0.135417	0.196721	0.383721	0.258065	0.186869	0.281553	0.261905	0.31383	0.146465	0.287879	0.214286	0.398058
12	124177289	T	C	rs7137946	TCTN2	single nucleotide variant	NM_024809.4(TCTN2):c.1099+19T>C	Meckel syndrome type 8;not specified	BiakaPygmy(HGDP)	0.417584	0.534797	Benign	C	0.433333	0.453814	0.428571	0.445796	0.731068	0.266993	0.391602	0.152306	0.126572	0.0328947	0.160377	0.359313	0.447671	0.426162	0.450669	0.486534	0.420202	0.731185	0.320755	0.396552	0.162596	0.346974	0.45418	0.406998	0.692708	0.680328	0.418605	0.215054	0.439394	0.165049	0.138095	0.393617	0.757576	0.328283	0.450549	0.441748
5	218356	T	C	rs2303741	SDHA	single nucleotide variant	NM_004168.3(SDHA):c.-115T>C	Leigh syndrome;Mitochondrial complex II deficiency;Pheochromocytoma	GWD(1KG_phase3)	0.204223	0.534715	Likely_benign	C	NA	NA	NA	NA	NA	NA	NA	NA	NA	NA	NA	NA	NA	NA	NA	NA	NA	0.527746	0.181604	0.158621	0.0481386	0.0832853	0.112975	0.133517	0.578125	0.590164	0.116279	0.0483871	0.111111	0.0631068	0.052381	0.223404	0.580808	0.0757576	0.131868	0.0582524
2	227872182	G	A	rs2228557	COL4A4	single nucleotide variant	NM_000092.4(COL4A4):c.4932C>T (p.Phe1644=)	Alport syndrome;not provided;not specified	MbutiPygmy(HGDP)	0.465431	0.534569	Benign	A	0.479339	0.409815	0.364266	0.412156	0.60694	0.530497	0.459186	0.39358	0.413305	0.38806	0.388263	0.483953	0.409734	0.381845	0.428829	0.578007	0.442244	0.60046	0.508274	0.441379	0.357143	0.480426	0.4329	0.490775	0.640625	0.590164	0.633721	0.446237	0.469697	0.466019	0.357143	0.462766	0.707071	0.479798	0.412088	0.548544
12	96366698	G	A	rs1059845	HAL	single nucleotide variant	NM_002108.3(HAL):c.*1312C>T	Histidinemia	Karitiana(HuOrigin)	0.382218	0.534449	Likely_benign	A	NA	NA	NA	NA	NA	NA	NA	NA	NA	NA	NA	NA	NA	NA	NA	NA	NA	0.162262	0.53184	0.462069	0.428479	0.365938	0.409168	0.381215	0.171875	0.245902	0.325581	0.408602	0.424242	0.378641	0.5	0.526596	0.146465	0.348485	0.384615	0.262136
20	6056356	G	A	rs1059391	FERMT1	single nucleotide variant	NM_017671.4(FERMT1):c.*1464C>T	Kindler's syndrome	Papuan(HuOrigin)	0.322829	0.534314	Benign	A	NA	NA	NA	NA	NA	NA	NA	NA	NA	NA	NA	NA	NA	NA	NA	NA	NA	0.227356	0.35461	0.2	0.590026	0.153138	0.231658	0.24262	0.234375	0.213115	0.30814	0.483871	0.217172	0.631068	0.580952	0.281915	0.176768	0.176768	0.159341	0.296117
10	69366602	T	C	rs3750863	CTNNA3	single nucleotide variant	NM_013266.3(CTNNA3):c.292+13A>G	not specified	MbutiPygmy(HGDP);Yoruba(HGDP)	0.465719	0.534281	Benign	C	0.330579	0.283192	0.272146	0.284484	0.80819	0.376766	0.255845	0.539852	0.530987	0.466667	0.542967	0.309573	0.287053	0.300681	0.300936	0.414764	0.327489	0.811464	0.363208	0.28125	0.512887	0.311744	0.288241	0.346507	0.833333	0.754098	0.424419	0.575269	0.272727	0.509709	0.514286	0.409574	0.944444	0.348485	0.269231	0.417476
1	21894735	T	C	rs3200254	ALPL	single nucleotide variant	NM_000478.5(ALPL):c.787T>C (p.Tyr263His)	Hypophosphatasia;not specified	Taa_West(HuOrigin)	0.27832	0.53418	Benign	C	0.125	0.116807	0.104196	0.104031	0.255881	0.251491	0.137383	0.444547	0.520702	0.578947	0.422933	0.183046	0.107169	0.105776	0.0965974	0.21556	0.156505	0.260249	0.212085	0.138889	0.444588	0.195677	0.111111	0.13511	0.234375	0.237705	0.267442	0.462366	0.126263	0.432039	0.457143	0.218085	0.353535	0.161616	0.126374	0.199029
18	3450455	C	A	rs238132	TGIF1	single nucleotide variant	NM_003244.3(TGIF1):c.-33C>A	Holoprosencephaly sequence;not specified	GWD(1KG_phase3)	0.218322	0.53389	Benign	A	0.153846	0.125544	0.152542	0.139955	0.581409	0.0963573	0.15154	0.137642	0.12908	0.159574	0.139253	0.163811	0.130641	0.130658	0.116168	0.166507	0.159713	0.577865	0.117021	0.127586	0.155039	0.159746	0.141929	0.170664	0.614583	0.54918	0.162791	0.215054	0.131313	0.106796	0.104762	0.164894	0.616162	0.186869	0.0879121	0.150485
16	3640274	G	A	rs714181	SLX4	single nucleotide variant	NM_032444.3(SLX4):c.3365C>T (p.Pro1122Leu)	Fanconi anemia;Fanconi anemia, complementation group P;not specified	Ju_hoan_North(HuOrigin)	0.193559	0.533713	Benign	A	0.115702	0.0798558	0.0806816	0.0824829	0.481477	0.110546	0.0555666	0.088344	0.0859089	0.144737	0.0883943	0.102894	0.0821723	0.0808989	0.0860182	0.179516	0.0984034	0.480304	0.107565	0.0448276	0.0863402	0.09384	0.0880711	0.104779	0.53125	0.434426	0.197674	0.0645161	0.0808081	0.0873786	0.0761905	0.148936	0.616162	0.0707071	0.0714286	0.26699
16	8875799	G	A	rs3743798	ABAT	single nucleotide variant	NM_020686.5(ABAT):c.*512G>A	Gamma-aminobutyric acid transaminase deficiency	Nganasans(HuOrigin)	0.375399	0.533692	Benign	A	NA	NA	NA	NA	NA	NA	NA	NA	NA	NA	NA	NA	NA	NA	NA	NA	NA	0.283214	0.380896	0.531034	0.385511	0.463155	0.447362	0.469444	0.28125	0.237705	0.406977	0.392473	0.5	0.461165	0.414286	0.393617	0.217172	0.525253	0.478022	0.427184
15	43170793	A	G	rs6493068	TTBK2	single nucleotide variant	NM_173500.3(TTBK2):c.23T>C (p.Leu8Pro)	Spinocerebellar Ataxia, Dominant;not specified	YRI(1KG_phase3)	0.461837	0.533534	Benign	G	0.27686	0.30511	0.29779	0.302357	0.865151	0.294479	0.359583	0.430916	0.452593	0.38806	0.425424	0.295063	0.304246	0.283835	0.310235	0.456958	0.325635	0.857242	0.321934	0.358621	0.401299	0.294339	0.285835	0.354206	0.927083	0.852459	0.406977	0.408602	0.282828	0.451456	0.357143	0.281915	0.984848	0.207071	0.302198	0.417476
2	136575199	G	T	rs6719488	LCT	single nucleotide variant	NM_002299.3(LCT):c.1419C>A (p.Gly473=)	Congenital lactase deficiency;Lactose intolerance	Icelandic(HuOrigin)	0.383221	0.533446	Benign	T	0.542017	0.770236	0.375544	0.662273	0.209094	0.459472	0.304175	0.396984	0.424449	0.480263	0.388835	0.709508	0.699386	0.384003	0.805066	0.409664	0.546493	0.218326	0.466981	0.293103	0.359717	0.702477	0.688921	0.582721	0.161458	0.245902	0.313953	0.397849	0.79798	0.354369	0.347619	0.489362	0.116162	0.656566	0.730769	0.325243
6	73111492	A	G	rs9446638	RIMS1	single nucleotide variant	NM_014989.5(RIMS1):c.*1076A>G	Cone-Rod Dystrophy, Dominant	MbutiPygmy(HGDP)	0.120451	0.533396	Likely_benign	G	NA	NA	NA	NA	NA	NA	NA	NA	NA	NA	NA	NA	NA	NA	NA	NA	NA	0.0933196	0.0791962	0.117241	0.137821	0.148446	0.130268	0.127072	0.0989583	0.106557	0.180233	0.182796	0.111111	0.106796	0.157143	0.0638298	0.0959596	0.151515	0.17033	0.092233
5	147480955	A	G	rs2303067	SPINK5	single nucleotide variant	NM_006846.3(SPINK5):c.1258A>G (p.Lys420Glu)	Netherton syndrome;SPINK5 POLYMORPHISM;not specified	Karitiana(HGDP)	0.466623	0.533377	Benign	G	0.483193	0.530998	0.522976	0.517261	0.23784	0.700442	0.461998	0.474805	0.437927	0.477273	0.484792	0.550283	0.520314	0.491729	0.508878	0.487212	0.524394	0.230893	0.673759	0.451724	0.476684	0.548703	0.508522	0.516575	0.265625	0.319672	0.569767	0.489247	0.459596	0.466019	0.419048	0.531915	0.212121	0.454545	0.532967	0.495146
1	9323910	G	A	rs6688832	H6PD	single nucleotide variant	NM_004285.3(H6PD):c.1358G>A (p.Arg453Gln)	Cortisone reductase deficiency 1	MbutiPygmy(HGDP)	0.3133	0.532854	Uncertain_significance	A	0.155462	0.229009	0.254875	0.229964	0.463814	0.333218	0.27652	0.472473	0.458879	0.473333	0.476065	0.219469	0.229427	0.233889	0.218496	0.278028	0.263871	0.458852	0.314421	0.248276	0.465071	0.231855	0.230774	0.267463	0.494792	0.467213	0.302326	0.526882	0.242424	0.461165	0.485714	0.382979	0.474747	0.267677	0.208791	0.359223
11	6652618	C	T	rs2659871	DCHS1	single nucleotide variant	NM_003737.3(DCHS1):c.3696G>A (p.Pro1232=)	not specified	MbutiPygmy(HGDP)	0.467154	0.532846	Benign	T	0.411017	0.383366	0.37476	0.391202	0.55815	0.39798	0.420319	0.448227	0.476166	0.493421	0.440352	0.402072	0.394501	0.403456	0.424015	0.369511	0.414706	0.558091	0.384161	0.412587	0.450968	0.393495	0.401966	0.393911	0.541667	0.557377	0.377907	0.408602	0.358586	0.451456	0.42381	0.420213	0.540404	0.368687	0.384615	0.383495
12	2805632	C	A	rs7957163	CACNA1C	single nucleotide variant	NM_000719.6(CACNA1C):c.*5267C>A	Brugada syndrome;Timothy syndrome	Hadza(HuOrigin)	0.171716	0.532829	Benign	A	NA	NA	NA	NA	NA	NA	NA	NA	NA	NA	NA	NA	NA	NA	NA	NA	NA	0.479705	0.167453	0.037931	0.0827985	0.0304948	0.0426885	0.0774908	0.494792	0.434426	0.0290698	0.11828	0.030303	0.0873786	0.104762	0.202128	0.570707	0.030303	0.0274725	0.0145631
6	129571330	G	A	rs3816665	LAMA2	single nucleotide variant	NM_000426.3(LAMA2):c.1856G>A (p.Arg619His)	Congenital Muscular Dystrophy, LAMA2-related;Merosin deficient congenital muscular dystrophy;not specified	ESN(1KG_phase3)	0.189807	0.532415	Benign	A	0.128099	0.137011	0.141639	0.138826	0.541836	0.119312	0.156312	0.0785061	0.0748945	0.131579	0.0788963	0.189811	0.135791	0.149438	0.12633	0.234481	0.16248	0.539899	0.108747	0.137931	0.0830116	0.188761	0.137378	0.191176	0.604167	0.47541	0.22093	0.0698925	0.186869	0.0533981	0.0714286	0.170213	0.722222	0.20202	0.126374	0.237864
20	62563648	C	A	rs75130625	DNAJC5	single nucleotide variant	NM_025219.2(DNAJC5):c.*727C>A	Neuronal Ceroid-Lipofuscinosis, Recessive	Ju_hoan_North(HuOrigin)	0.0586	0.532309	Likely_benign	A	NA	NA	NA	NA	NA	NA	NA	NA	NA	NA	NA	NA	NA	NA	NA	NA	NA	0.044949	0.0378251	0.0724138	0.00323415	0.175808	0.0902334	0.120626	0.0416667	0.0655738	0	0.00537634	0.0808081	0	0.0047619	0.037234	0.030303	0.121212	0.0879121	0.0291262
5	147480112	T	C	rs2303065	SPINK5	single nucleotide variant	NM_006846.3(SPINK5):c.1188T>C (p.His396=)	Netherton syndrome;not specified	Karitiana(HuOrigin)	0.467746	0.532254	Benign	C	0.483471	0.530782	0.521716	0.517077	0.237825	0.700325	0.461844	0.474789	0.4375	0.470149	0.484957	0.549536	0.519982	0.491366	0.508584	0.487321	0.52381	0.230672	0.67217	0.454861	0.474642	0.548359	0.508573	0.515625	0.265625	0.319672	0.569767	0.489247	0.459596	0.466019	0.419048	0.531915	0.212121	0.449495	0.532967	0.495146
17	41194885	T	C	rs7223952	BRCA1	single nucleotide variant	NM_007294.3(BRCA1):c.*2810A>G	Breast-ovarian cancer, familial 1	Taa_West(HuOrigin)	0.436863	0.531887	Benign	C	NA	NA	NA	NA	NA	NA	NA	NA	NA	NA	NA	NA	NA	NA	NA	NA	NA	0.683671	0.236967	0.326389	0.366624	0.395617	0.348603	0.404806	0.697917	0.639344	0.523256	0.5	0.363636	0.349515	0.37619	0.441489	0.762626	0.358586	0.324176	0.509709
7	94047050	G	T	rs1800238	COL1A2	single nucleotide variant	NM_000089.3(COL1A2):c.1878G>T (p.Val626=)	Ehlers-Danlos syndrome, procollagen proteinase deficient;Osteogenesis Imperfecta, Dominant;not specified	Onge(HuOrigin)	0.104719	0.531645	Benign	T	0.012931	0.00820569	0.00827393	0.00879129	0.0175072	0.0663813	0.0105955	0.363087	0.360067	0.372727	0.363851	0.0317687	0.00889592	0.0126316	0.0102339	0.0529881	0.0346391	0.0187356	0.057783	0.0137931	0.357881	0.0279217	0.0122536	0.0395221	0.0104167	0.0245902	0.0465116	0.344086	0.010101	0.373786	0.380952	0.037234	0.0151515	0.0353535	0.0164835	0.0728155
3	183861243	A	G	rs843358	EIF2B5	single nucleotide variant	NM_003907.3(EIF2B5):c.1759A>G (p.Ile587Val)	Leukoencephalopathy with vanishing white matter;not provided;not specified	Papuan(HGDP)	0.380129	0.531636	Benign	G	0.322314	0.32853	0.297424	0.319522	0.321029	0.383392	0.275397	0.52338	0.568884	0.526316	0.511302	0.310276	0.319865	0.304723	0.31767	0.402143	0.329967	0.316632	0.361702	0.282759	0.542802	0.291643	0.331145	0.315838	0.322917	0.360656	0.465116	0.456989	0.333333	0.533981	0.514286	0.382979	0.29798	0.257576	0.32967	0.441748
5	147481018	G	A	rs2303068	SPINK5	single nucleotide variant	NM_006846.3(SPINK5):c.1302+19G>A	not specified	Karitiana(HuOrigin)	0.468378	0.531622	Benign	A	0.483333	0.530267	0.517589	0.516221	0.237296	0.699901	0.461577	0.473339	0.436937	0.476923	0.483154	0.549544	0.518625	0.489474	0.506465	0.487396	0.52377	0.231089	0.671395	0.451724	0.477865	0.547811	0.507416	0.514733	0.270833	0.319672	0.569767	0.489247	0.459596	0.466019	0.419048	0.531915	0.212121	0.449495	0.532967	0.495146
4	123665428	G	A	rs4833843	BBS12	single nucleotide variant	NM_152618.2(BBS12):c.*248G>A	Bardet-Biedl syndrome	BTQ(AAGC)	0.385058	0.531608	Benign	A	NA	NA	NA	NA	NA	NA	NA	NA	NA	NA	NA	NA	NA	NA	NA	NA	NA	0.356633	0.35461	0.151724	0.651671	0.0778098	0.0905139	0.163284	0.401042	0.385246	0.389535	0.693548	0.0909091	0.582524	0.661905	0.265957	0.30303	0.0505051	0.0879121	0.296117
16	86547001	C	T	rs56404456	FOXF1	single nucleotide variant	NM_001451.2(FOXF1):c.*310C>T	Persistent fetal circulation	MSL(1KG_phase3)	0.409639	0.531538	Benign	T	NA	NA	NA	NA	NA	NA	NA	NA	NA	NA	NA	NA	NA	NA	NA	NA	NA	0.785566	0.357311	0.336806	0.184685	0.344092	0.317547	0.338889	0.796875	0.778689	0.465116	0.225806	0.348485	0.18932	0.2	0.276596	0.80303	0.308081	0.324176	0.514563
16	2162887	A	G	rs2369068	PKD1	single nucleotide variant	NM_001009944.2(PKD1):c.3063T>C (p.Gly1021=)	Polycystic kidney disease, adult type;not specified	GWD(1KG_phase3)	0.127761	0.531531	Benign	G	0.0762712	0.100968	0.139512	0.100715	0.472492	0.0818576	0.1476	5.44484e-05	0.000262055	0	0	0.0698919	0.0991234	0.118491	0.0748346	0.029406	0.115321	0.464137	0.0959716	0.151724	0.000643501	0.0665323	0.0901416	0.105893	0.505208	0.409836	0	0	0.0909091	0	0	0.202128	0.494949	0.0757576	0.0824176	0.0145631
16	2155297	A	G	rs9934488	PKD1	single nucleotide variant	NM_000296.3(PKD1):c.8016+26T>C	not specified	GWD(1KG_phase3)	0.145534	0.531457	Benign	G	0.13253	0.137659	0.0804165	0.109196	0.352166	0.0837932	0.173821	0.000111607	0.000262329	0	7.13369e-05	0.121734	0.107648	0.0714286	0.0688115	0.0717658	0.133033	0.482534	0.123515	0.244526	0.0025641	0.180403	0.156892	0.172575	0.505208	0.409836	0.0465116	0	0.161616	0	0	0.234043	0.505051	0.181818	0.137363	0.092233
17	76989062	C	T	rs8079368	CANT1	single nucleotide variant	NM_138793.3(CANT1):c.*570G>A	Desbuquois Dysplasia	Ju_hoan_North(HuOrigin)	0.173188	0.531357	Benign	T	NA	NA	NA	NA	NA	NA	NA	NA	NA	NA	NA	NA	NA	NA	NA	NA	NA	0.190542	0.0695755	0.0931034	0.333763	0.102535	0.0904552	0.109375	0.177083	0.114754	0.19186	0.241935	0.0757576	0.300971	0.319048	0.101064	0.20202	0.111111	0.0879121	0.140777
1	183542387	T	C	rs2274064	NCF2	single nucleotide variant	NM_000433.3(NCF2):c.542A>G (p.Lys181Arg)	Chronic granulomatous disease;not specified	Karitiana(HuOrigin);Karitiana(HGDP)	0.468893	0.531107	Benign	C	0.42562	0.483224	0.416464	0.460364	0.358821	0.64484	0.390653	0.623437	0.636078	0.684211	0.619454	0.485671	0.465929	0.415356	0.471914	0.507349	0.461388	0.368579	0.588652	0.424138	0.625969	0.481577	0.469671	0.484317	0.322917	0.377049	0.494186	0.564516	0.464646	0.669903	0.557143	0.569149	0.267677	0.393939	0.505495	0.509709
3	46008790	G	A	rs3796375	FYCO1	single nucleotide variant	NM_024513.3(FYCO1):c.2036C>T (p.Ala679Val)	Congenital cataract;not specified	Pima(HGDP)	0.433378	0.530908	Benign	A	0.40678	0.431976	0.420265	0.416602	0.131566	0.605755	0.389982	0.668734	0.611315	0.611842	0.684543	0.474579	0.423932	0.40219	0.423622	0.358748	0.428501	0.134376	0.56872	0.4	0.684923	0.442142	0.41498	0.434259	0.119792	0.204918	0.325581	0.704301	0.414141	0.606796	0.704762	0.473404	0.0454545	0.454545	0.467033	0.412621
17	1580929	G	C	rs11078565	PRPF8	single nucleotide variant	NM_006445.3(PRPF8):c.1914C>G (p.Leu638=)	Retinitis Pigmentosa, Dominant	LWK(1KG_phase3)	0.217034	0.53044	Likely_benign	C	0.266667	0.208705	0.222126	0.218499	0.57341	0.111786	0.290566	0.0700304	0.0487166	0.0460526	0.0759257	0.191149	0.212703	0.247001	0.204149	0.160393	0.217476	0.569743	0.140995	0.361111	0.0670968	0.190558	0.215252	0.212707	0.598958	0.52459	0.122093	0.0967742	0.212121	0.101942	0.0904762	0.159574	0.631313	0.146465	0.225275	0.228155
20	62562194	C	T	rs78457562	DNAJC5	single nucleotide variant	NM_025219.2(DNAJC5):c.322-10C>T	Neuronal Ceroid-Lipofuscinosis, Recessive;not provided;not specified	Ju_hoan_North(HuOrigin)	0.060853	0.530056	Benign	T	0.0932203	0.0757417	0.0542095	0.0759164	0.0667899	0.0315175	0.0432406	0.00179504	0	0.0131579	0.00215039	0.177259	0.0731369	0.0690691	0.0742415	0.0412556	0.0673203	0.0695752	0.0424528	0.0724138	0.00320513	0.176454	0.0906497	0.122468	0.0729167	0.0819672	0	0.00537634	0.0808081	0	0.0047619	0.037234	0.0505051	0.121212	0.0879121	0.0291262
11	17419279	C	T	rs1799859	ABCC8	single nucleotide variant	NM_000352.4(ABCC8):c.3819G>A (p.Arg1273=)	Hyperinsulinism, Dominant/Recessive;Permanent neonatal diabetes mellitus;Persistent hyperinsulinemic hypoglycemia of infancy;Transient Neonatal Diabetes, Dominant;not specified	Mandenka(HGDP)	0.333734	0.529903	Benign	T	0.264957	0.269301	0.295705	0.272007	0.713907	0.39063	0.251642	0.0831882	0.123363	0.106667	0.0723009	0.155277	0.264152	0.251883	0.233995	0.291852	0.280177	0.710175	0.366745	0.255172	0.0688546	0.161188	0.252244	0.259259	0.734375	0.647541	0.267442	0.0376344	0.282828	0.092233	0.104762	0.478723	0.828283	0.186869	0.313187	0.320388
16	75590092	G	C	rs3743601	TMEM231	single nucleotide variant	NM_001077416.2(TMEM231):c.78C>G (p.Ser26Arg)	not specified	HAN(AAGC)	0.30911	0.529779	Benign	C	0.0897436	0.0511662	0.0562882	0.0549073	0.102725	0.437645	0.145588	0.750566	0.763725	0.625	0.745789	0.0583893	0.0519804	0.0764588	0.047322	0.312184	0.157913	0.0895282	0.360849	0.124138	0.729032	0.0524194	0.0457139	0.105699	0.135417	0.0983607	0.424419	0.553763	0.0505051	0.771845	0.757143	0.292553	0.0656566	0.030303	0.0274725	0.320388
7	107603431	A	C	rs2230156	LAMB1	single nucleotide variant	NM_002291.2(LAMB1):c.1776T>G (p.Pro592=)	not specified	BTQ(AAGC)	0.26191	0.529757	Benign	C	0.342975	0.278228	0.256087	0.28988	0.355965	0.278996	0.223987	0.245996	0.211873	0.335526	0.254023	0.325372	0.284422	0.316579	0.296594	0.22532	0.257991	0.358015	0.268868	0.229167	0.240669	0.327845	0.309614	0.295203	0.390625	0.352459	0.203488	0.231183	0.252525	0.213592	0.242857	0.271277	0.393939	0.252525	0.208791	0.199029
12	15776095	C	T	rs1126786	EPS8	single nucleotide variant	NM_004447.5(EPS8):c.2352G>A (p.Leu784=)	not provided;not specified	ESN(1KG_phase3)	0.121899	0.529617	Benign	T	0	0.0247527	0.025075	0.0214642	0.495205	0.0315674	0.0243574	0.0433174	0.0425644	0.0328947	0.0436444	0.00397122	0.0223365	0.0140045	0.0194354	0.0439572	0.0355201	0.483625	0.0449173	0.0241379	0.0397946	0.0051963	0.0206547	0.0341959	0.536458	0.418033	0.0755814	0.0645161	0.0151515	0.0339806	0.0380952	0.0638298	0.651515	0	0.0164835	0.0339806
9	130586688	G	A	rs3739817	ENG	single nucleotide variant	NM_000118.3(ENG):c.1029C>T (p.Thr343=)	Juvenile Polyposis;Osler hemorrhagic telangiectasia syndrome;not specified	Papuan(HGDP)	0.088485	0.529162	Likely_benign	A	0.129167	0.0816297	0.0640334	0.0789423	0.044811	0.0889397	0.0593843	0.02795	0.0167627	0.0263158	0.0309293	0.0882353	0.08213	0.0797753	0.0944849	0.192984	0.077814	0.0451517	0.0839243	0.103448	0.0359435	0.0893887	0.0883271	0.0940959	0.0572917	0.0327869	0.232558	0.016129	0.0656566	0.0194175	0.00952381	0.0691489	0.0454545	0.0757576	0.0769231	0.208738
13	95056768	C	T	rs1951797	GPC6	single nucleotide variant	NM_005708.4(GPC6):c.*1297C>T	Omodysplasia	Koryaks(Estonian_Biocentre)	0.237594	0.529073	Likely_benign	T	NA	NA	NA	NA	NA	NA	NA	NA	NA	NA	NA	NA	NA	NA	NA	NA	NA	0.130555	0.327014	0.293103	0.183398	0.289459	0.210646	0.229705	0.130208	0.122951	0.19186	0.139785	0.222222	0.208738	0.161905	0.239362	0.0808081	0.277778	0.164835	0.208738
20	744415	G	A	rs3746804	SLC52A3	single nucleotide variant	NM_033409.3(SLC52A3):c.800C>T (p.Pro267Leu)	not specified	TBN(AAGC)	0.228672	0.528904	Benign	A	0.256198	0.219827	0.149008	0.208546	0.150769	0.112862	0.184498	0.255168	0.385018	0.322368	0.220064	0.220418	0.211836	0.15979	0.235391	0.199027	0.190189	0.15778	0.112028	0.190972	0.255128	0.211118	0.215436	0.20864	0.0989583	0.196721	0.116279	0.166667	0.212121	0.349515	0.238095	0.101064	0.141414	0.207071	0.296703	0.247573
7	100855001	C	T	rs2301903	PLOD3	single nucleotide variant	NM_001084.4(PLOD3):c.1233-4G>A	not specified	PEL(1KG_phase3)	0.077054	0.528828	Benign	T	0.00925926	0.0111178	0.0133047	0.0116219	0.12395	0.309592	0.0152128	0.0835124	0.0724249	0.0108696	0.0872255	0.0173005	0.011572	0.00849057	0.011922	0.0160062	0.0438218	0.121195	0.247642	0.00344828	0.0875161	0.0135525	0.0117142	0.0368324	0.104167	0.0983607	0.0290698	0.112903	0.00505051	0.0679612	0.0857143	0.180851	0.131313	0.00505051	0.0164835	0.0242718
1	59041577	A	G	rs3551	TACSTD2	single nucleotide variant	NM_002353.2(TACSTD2):c.*280T>C	Corneal Dystrophy, Dominant/Recessive	GWD(1KG_phase3)	0.356307	0.528648	Benign	G	NA	NA	NA	NA	NA	NA	NA	NA	NA	NA	NA	NA	NA	NA	NA	NA	NA	0.757074	0.222749	0.372414	0.173299	0.232009	0.318889	0.306066	0.822917	0.647541	0.325581	0.193548	0.348485	0.18932	0.185714	0.287234	0.843434	0.252525	0.362637	0.276699
3	45959759	T	C	rs7129	FYCO1	single nucleotide variant	NM_024513.3(FYCO1):c.*3498A>G	Congenital cataract	Pima(HGDP)	0.435672	0.528614	Benign	C	NA	NA	NA	NA	NA	NA	NA	NA	NA	NA	NA	NA	NA	NA	NA	NA	NA	0.206539	0.564858	0.410345	0.668814	0.411765	0.385584	0.414207	0.208333	0.262295	0.296512	0.693548	0.393939	0.592233	0.719048	0.473404	0.141414	0.40404	0.43956	0.398058
18	47351170	C	A	rs9959610	MYO5B	single nucleotide variant	NM_001080467.2(MYO5B):c.*1671G>T	Diarrhea with Microvillus Atrophy	Pima(HGDP)	0.185688	0.528598	Benign	A	NA	NA	NA	NA	NA	NA	NA	NA	NA	NA	NA	NA	NA	NA	NA	NA	NA	0.0997699	0.336879	0.0275862	0.29601	0.0688364	0.0510204	0.104972	0.09375	0.188525	0.296512	0.155914	0.0454545	0.286408	0.238095	0.207447	0.106061	0.0555556	0.0824176	0.271845
17	73824121	T	C	rs7210574	UNC13D	single nucleotide variant	NM_199242.2(UNC13D):c.3198A>G (p.Glu1066=)	Familial hemophagocytic lymphohistiocytosis;Hemophagocytic lymphohistiocytosis, familial, 3;not specified	MSL(1KG_phase3)	0.471523	0.528477	Benign	C	0.25	0.334808	0.410674	0.346701	0.888326	0.303428	0.496772	0.436251	0.504328	0.530612	0.417172	0.276134	0.343354	0.383117	0.325209	0.3834	0.384894	0.880235	0.32109	0.493103	0.428387	0.272334	0.319063	0.350184	0.875	0.885246	0.296512	0.360215	0.348485	0.529126	0.442857	0.388298	0.994949	0.207071	0.324176	0.276699
1	183184616	C	T	rs2274980	LAMC2	single nucleotide variant	NM_005562.2(LAMC2):c.297C>T (p.Ser99=)	Epidermolysis bullosa, junctional;not specified	Taa_West(HuOrigin)	0.315354	0.528396	Benign	T	0.181818	0.182131	0.143665	0.171282	0.38826	0.378232	0.165873	0.343322	0.375327	0.421053	0.334027	0.181331	0.176585	0.170412	0.188978	0.31553	0.210955	0.389197	0.356974	0.141379	0.337629	0.196717	0.175867	0.203125	0.4375	0.442623	0.348837	0.317204	0.136364	0.305825	0.32381	0.207447	0.469697	0.19697	0.164835	0.271845
17	64210757	C	A	rs4581	APOH	single nucleotide variant	NM_000042.2(APOH):c.796G>T (p.Val266Leu)	APOH POLYMORPHISM	Karitiana(HGDP)	0.471814	0.528186	Benign	A	0.25	0.235122	0.227201	0.226237	0.520062	0.553327	0.245371	0.769159	0.801467	0.796053	0.760262	0.249282	0.230437	0.236309	0.228488	0.549262	0.318495	0.512307	0.516548	0.262069	0.748711	0.24812	0.235566	0.303867	0.505208	0.52459	0.633721	0.77957	0.20202	0.762136	0.742857	0.468085	0.59596	0.237374	0.230769	0.65534
3	9985656	C	T	rs3774207	CRELD1	single nucleotide variant	NM_015513.4(CRELD1):c.1049-393C>T	not specified	ESN(1KG_phase3)	0.335495	0.528142	Benign	T	0.227273	0.240683	0.230392	0.239427	0.729823	0.307743	0.294141	0.182634	0.242797	0.203947	0.166482	0.158982	0.234221	0.217016	0.221665	0.253054	0.252123	0.714615	0.331354	0.296552	0.163449	0.175216	0.229919	0.261029	0.770833	0.754098	0.180233	0.0860215	0.232323	0.179612	0.161905	0.303191	0.863636	0.131313	0.274725	0.223301
6	70984436	A	G	rs592121	COL9A1	single nucleotide variant	NM_001851.4(COL9A1):c.1015T>C (p.Ser339Pro)	Multiple Epiphyseal Dysplasia, Dominant;Stickler Syndrome, Recessive;not specified	MbutiPygmy(HGDP)	0.433455	0.528083	Benign	G	0.433333	0.382211	0.390997	0.394414	0.686815	0.322196	0.346047	0.343145	0.389413	0.44	0.329888	0.321166	0.387347	0.411853	0.382728	0.453315	0.389379	0.681285	0.364286	0.351724	0.350968	0.3197	0.391242	0.384686	0.697917	0.639344	0.5	0.333333	0.424242	0.296117	0.285714	0.37234	0.782828	0.30303	0.340659	0.495146
10	8097368	G	A	rs10905277	GATA3	single nucleotide variant	NM_001002295.1(GATA3):c.-251G>A	Barakat syndrome	Onge(HuOrigin);Papuan(HuOrigin);BTQ(AAGC)	0.472008	0.527992	Benign	A	NA	NA	NA	NA	NA	NA	NA	NA	NA	NA	NA	NA	NA	NA	NA	NA	NA	0.229571	0.406398	0.472414	0.617876	0.440139	0.537714	0.485158	0.223958	0.336066	0.703488	0.693548	0.585859	0.674757	0.638095	0.404255	0.186869	0.439394	0.532967	0.587379
5	125931022	T	G	rs900641	ALDH7A1	single nucleotide variant	NM_001182.4(ALDH7A1):c.-132A>C	Pyridoxine-dependent epilepsy	GWD(1KG_phase3)	0.202462	0.527626	Benign	G	NA	NA	NA	NA	NA	NA	NA	NA	NA	NA	NA	NA	NA	NA	NA	NA	NA	0.570516	0.0911271	0.103448	0.0577173	0.0758721	0.104229	0.130996	0.578125	0.491803	0.174419	0.112903	0.10101	0.038835	0.0428571	0.138298	0.722222	0.0707071	0.0714286	0.121359
14	73689629	G	A	rs362393	PSEN1	single nucleotide variant	NM_000021.3(PSEN1):c.*3632G>A	Dilated Cardiomyopathy, Dominant;Early-Onset Familial Alzheimer Disease	MbutiPygmy(HGDP)	0.049371	0.527552	Likely_benign	A	NA	NA	NA	NA	NA	NA	NA	NA	NA	NA	NA	NA	NA	NA	NA	NA	NA	0.153837	0.0542453	0.0689655	0.00834403	0.0685089	0.0863901	0.0799632	0.130208	0.114754	0.00581395	0.016129	0.0757576	0.0145631	0.0047619	0.037234	0.0505051	0.0707071	0.115385	0.0145631
12	48527059	G	A	rs2269933	PFKM	single nucleotide variant	NM_000289.5(PFKM):c.428-39G>A	not specified	MbutiPygmy(HGDP)	0.241689	0.527542	Benign	A	0.289256	0.319638	0.320169	0.301293	0.305943	0.160352	0.320087	0.254355	0.244631	0.190789	0.257605	0.247063	0.306605	0.28287	0.288609	0.158736	0.272742	0.31015	0.185579	0.309028	0.282497	0.24266	0.305064	0.263889	0.260417	0.286885	0.180233	0.11828	0.308081	0.271845	0.219048	0.25	0.313131	0.272727	0.307692	0.165049
5	147477551	C	T	rs34482796	SPINK5	single nucleotide variant	NM_006846.3(SPINK5):c.1004C>T (p.Ala335Val)	Netherton syndrome;not specified	Karitiana(HuOrigin)	0.472572	0.527428	Benign	T	0.483193	0.523947	0.519452	0.510965	0.292282	0.70173	0.45714	0.476773	0.438298	0.462687	0.487229	0.545383	0.512718	0.488722	0.496498	0.485108	0.521262	0.28821	0.670213	0.444828	0.480595	0.544118	0.502404	0.512015	0.3125	0.360656	0.569767	0.473118	0.454545	0.461165	0.419048	0.526596	0.267677	0.444444	0.527473	0.490291
6	80196848	C	T	rs1875845	LCA5	single nucleotide variant	NM_181714.3(LCA5):c.1967G>A (p.Gly656Asp)	Leber congenital amaurosis;not specified	MbutiPygmy(HGDP)	0.318731	0.527423	Likely_benign	T	0.3125	0.309456	0.273305	0.308131	0.520436	0.291635	0.263941	0.250816	0.29171	0.361842	0.238838	0.259013	0.312928	0.311844	0.341702	0.282228	0.285994	0.524227	0.311456	0.313793	0.251943	0.267127	0.311084	0.289279	0.505208	0.532787	0.255814	0.284946	0.323232	0.281553	0.214286	0.345745	0.540404	0.257576	0.307692	0.199029
17	3414160	T	C	rs2271158	TRPV3	single nucleotide variant	NM_145068.3(TRPV3):c.*3051A>G	Palmoplantar keratoderma, mutilating, with periorificial keratotic plaques	Karitiana(HuOrigin)	0.47259	0.52741	Benign	C	NA	NA	NA	NA	NA	NA	NA	NA	NA	NA	NA	NA	NA	NA	NA	NA	NA	0.148944	0.596698	0.413793	0.60296	0.452819	0.373962	0.437269	0.145833	0.237705	0.709302	0.639785	0.318182	0.645631	0.633333	0.478723	0.10101	0.40404	0.368132	0.490291
2	96952833	A	G	rs3171927	SNRNP200	single nucleotide variant	NM_014014.4(SNRNP200):c.3550T>C (p.Leu1184=)	Retinitis Pigmentosa, Dominant	Vishwabrahmin(HuOrigin)	0.319033	0.52712	Likely_benign	G	0.293388	0.302518	0.362141	0.304585	0.0757352	0.261852	0.387555	0.176797	0.181771	0.342105	0.173738	0.230737	0.303645	0.359925	0.272978	0.659502	0.340665	0.0804558	0.264151	0.389655	0.165597	0.228111	0.296426	0.259704	0.0833333	0.0245902	0.668605	0.231183	0.323232	0.150485	0.12381	0.244681	0.0505051	0.217172	0.269231	0.665049
14	81562998	T	C	rs2075179	TSHR	single nucleotide variant	NM_000369.2(TSHR):c.561T>C (p.Asn187=)	Congenital hypothyroidism;Hyperthyroidism, nonautoimmune;not specified	BiakaPygmy(HGDP)	0.258619	0.527096	Likely_benign	C	0.104167	0.129983	0.127483	0.135479	0.548687	0.122786	0.144745	0.336343	0.375459	0.289474	0.326491	0.17405	0.135138	0.117956	0.148426	0.162256	0.153268	0.535731	0.102594	0.131034	0.333977	0.174051	0.141671	0.174954	0.614583	0.52459	0.174419	0.252688	0.0858586	0.364078	0.319048	0.12234	0.570707	0.161616	0.142857	0.160194
13	101720300	T	G	rs1289556	NALCN	single nucleotide variant	NM_052867.3(NALCN):c.4416A>C (p.Ile1472=)	not specified	Yoruba(HGDP)	0.33016	0.526982	Benign	G	0.325	0.356151	0.357217	0.361875	0.719316	0.1848	0.424493	0.124741	0.144619	0.14	0.119316	0.354097	0.360159	0.368539	0.365342	0.335806	0.341579	0.714977	0.258255	0.431034	0.130769	0.358501	0.363005	0.349908	0.739583	0.663934	0.348837	0.112903	0.368687	0.11165	0.104762	0.297872	0.792929	0.368687	0.335165	0.38835
10	73537388	T	C	rs7917781	CDH23	single nucleotide variant	NM_022124.5(CDH23):c.4846-49T>C	not specified	Pima(HuOrigin)	0.40212	0.526451	Benign	C	0.490909	0.46653	0.419045	0.446974	0.327869	0.479932	0.417449	0.490121	0.448193	0.483871	0.500924	0.460032	0.455228	0.408846	0.454416	0.37987	0.432091	0.343483	0.479905	0.451724	0.472329	0.453629	0.462248	0.452118	0.322917	0.401639	0.401163	0.489247	0.449495	0.466019	0.461905	0.382979	0.287879	0.434343	0.510989	0.456311
3	129210977	G	C	rs2285354	IFT122	single nucleotide variant	NM_052985.3(IFT122):c.2146-7G>C	Cranioectodermal dysplasia;Cranioectodermal dysplasia 1;not specified	ESN(1KG_phase3)	0.453503	0.526295	Benign	C	0.128099	0.151756	0.221054	0.163815	0.841108	0.278982	0.278671	0.675927	0.620744	0.625	0.69107	0.0703587	0.15667	0.187266	0.124933	0.372575	0.246091	0.829846	0.280142	0.265517	0.693152	0.0757488	0.143544	0.191529	0.921875	0.770492	0.447674	0.72043	0.161616	0.640777	0.67619	0.303191	0.979798	0.0757576	0.153846	0.359223
13	103498375	T	C	rs2296147	ERCC5	single nucleotide variant	NM_000123.3(ERCC5):c.-242T>C	Xeroderma pigmentosum	Kalash(HGDP)	0.321697	0.526129	Benign	C	NA	NA	NA	NA	NA	NA	NA	NA	NA	NA	NA	NA	NA	NA	NA	NA	NA	0.203147	0.293632	0.531034	0.189987	0.407599	0.476948	0.418199	0.119792	0.229508	0.401163	0.155914	0.449495	0.228155	0.204762	0.462766	0.141414	0.454545	0.494505	0.42233
12	81102921	T	C	rs3121	MYF6	single nucleotide variant	NM_002469.2(MYF6):c.*182T>C	Centronuclear Myopathy, Dominant	Yoruba(HGDP)	0.402632	0.52594	Benign	C	NA	NA	NA	NA	NA	NA	NA	NA	NA	NA	NA	NA	NA	NA	NA	NA	NA	0.788935	0.318396	0.475862	0.260618	0.360104	0.372923	0.383057	0.807292	0.827869	0.325581	0.252688	0.388889	0.228155	0.2	0.473404	0.893939	0.328283	0.428571	0.393204
2	179464527	T	C	rs1001238	TTN	single nucleotide variant	NM_133378.4(TTN):c.48397A>G (p.Asn16133Asp)	Cardiovascular phenotype;Dilated Cardiomyopathy, Dominant;Distal myopathy Markesbery-Griggs type;Hereditary myopathy with early respiratory failure;Hypertrophic cardiomyopathy;Limb-Girdle Muscular Dystrophy, Recessive;Myopathy, early-onset, with fatal cardiomyopathy;not specified	Papuan(HGDP)	0.474293	0.525707	Likely_benign	C	0.233051	0.221527	0.247912	0.227599	0.543754	0.431965	0.28973	0.712587	0.660367	0.671875	0.726531	0.278727	0.227531	0.240196	0.22669	0.522932	0.311327	0.536734	0.41253	0.241379	0.699475	0.269896	0.230005	0.302947	0.552083	0.508197	0.651163	0.844086	0.212121	0.660194	0.733333	0.393617	0.636364	0.308081	0.236264	0.509709
10	123243197	G	A	rs2278202	FGFR2	single nucleotide variant	NM_000141.4(FGFR2):c.2301+15C>T	Acrocephalosyndactyly type I;Craniosynostosis;Crouzon syndrome;Cutis Gyrata syndrome of Beare and Stevenson;Isolated coronal synostosis;Jackson-Weiss syndrome;Levy-Hollister syndrome;Pfeiffer syndrome;Saethre-Chotzen syndrome;not specified	Karitiana(HuOrigin);Maya(HuOrigin)	0.474322	0.525678	Benign	A	0.545455	0.594161	0.545604	0.580966	0.17452	0.759823	0.603383	0.344674	0.417545	0.328947	0.325425	0.507875	0.578303	0.576601	0.563423	0.626436	0.568189	0.171004	0.727594	0.575862	0.323871	0.497985	0.575628	0.512915	0.151042	0.155738	0.587209	0.252688	0.590909	0.398058	0.32381	0.617021	0.10101	0.505051	0.582418	0.699029
5	70809169	A	G	rs1698063	BDP1	single nucleotide variant	NM_018429.2(BDP1):c.4405A>G (p.Lys1469Glu)	not specified	Papuan(HuOrigin)	0.403032	0.52554	Benign	G	0.429167	0.459921	0.438788	0.446399	0.367338	0.243336	0.458626	0.359928	0.350997	0.38806	0.362121	0.499303	0.454232	0.445365	0.462185	0.486097	0.439232	0.365616	0.251807	0.493103	0.35214	0.489211	0.452281	0.434457	0.348958	0.401639	0.453488	0.38172	0.494949	0.330097	0.395238	0.382979	0.378788	0.5	0.5	0.436893
2	47693959	G	A	rs3732183	MSH2	single nucleotide variant	NM_000251.2(MSH2):c.1661+12G>A	Hereditary cancer-predisposing syndrome;Lynch syndrome;Lynch syndrome I;not specified	BTQ(AAGC)	0.391174	0.525493	Benign	A	0.308333	0.27103	0.24037	0.266122	0.627532	0.294878	0.230532	0.656876	0.603457	0.592105	0.671708	0.389685	0.273559	0.251126	0.30298	0.328982	0.303577	0.619936	0.287915	0.22069	0.673745	0.396183	0.291948	0.382189	0.630208	0.581967	0.401163	0.752688	0.313131	0.61165	0.619048	0.367021	0.661616	0.353535	0.285714	0.315534
17	73827205	T	C	rs1135688	UNC13D	single nucleotide variant	NM_199242.2(UNC13D):c.2599A>G (p.Lys867Glu)	Familial hemophagocytic lymphohistiocytosis;Hemophagocytic lymphohistiocytosis, familial, 3;not specified	MSL(1KG_phase3)	0.445284	0.525304	Benign	C	0.231092	0.319092	0.386248	0.324378	0.843607	0.2455	0.421813	0.426821	0.48847	0.513158	0.409571	0.226279	0.319572	0.365283	0.281545	0.359808	0.354923	0.839241	0.273585	0.431034	0.416452	0.230969	0.305957	0.321033	0.822917	0.803279	0.290698	0.327957	0.338384	0.529126	0.442857	0.37234	0.944444	0.166667	0.351648	0.257282
2	108487901	A	G	rs832358	RGPD4	single nucleotide variant	NM_182588.2(RGPD4):c.3441A>G (p.Leu1147=)	not specified	YRI(1KG_phase3)	0.363611	0.525278	Benign	G	0.3	0.382412	0.00771912	0.179901	0.683396	0.159055	0.228291	0.063173	0.0936782	0.04	0.055268	0.0502506	0.225351	0.0180723	0.00263207	0.319369	0.29267	0.323298	0.0751445	0.134615	0.0272331	0.198133	0.142857	0.147059	0.765625	0.754098	0.616279	0.0806452	0.525253	0.0825243	0.17619	0.37234	0.792929	0.560606	0.554945	0.626214
1	225589473	C	T	rs7406	LBR	single nucleotide variant	NM_002296.3(LBR):c.*1532G>A	Greenberg dysplasia	Mandenka(HGDP)	0.202133	0.525139	Benign	T	NA	NA	NA	NA	NA	NA	NA	NA	NA	NA	NA	NA	NA	NA	NA	NA	NA	0.521899	0.115566	0.12069	0.042362	0.12932	0.157109	0.176471	0.552083	0.47541	0.30814	0.0537634	0.151515	0.0291262	0.0285714	0.143617	0.631313	0.156566	0.120879	0.364078
7	34194102	A	G	rs2058681	BMPER	single nucleotide variant	NM_133468.5(BMPER):c.*1217A>G	Diaphanospondylodysostosis	Papuan(HGDP)	0.298412	0.525118	Benign	G	NA	NA	NA	NA	NA	NA	NA	NA	NA	NA	NA	NA	NA	NA	NA	NA	NA	0.0597152	0.307783	0.36014	0.338273	0.347638	0.351772	0.328729	0.0520833	0.0409836	0.406977	0.311828	0.323232	0.300971	0.3	0.265957	0.00505051	0.348485	0.296703	0.504854
4	88928968	G	C	rs1805044	PKD2	single nucleotide variant	NM_000297.3(PKD2):c.83G>C (p.Arg28Pro)	Polycystic kidney disease, autosomal dominant;not specified	afr(gnomAD.exomes)	0.224903	0.525097	Likely_benign	C	NA	0.352332	0.4375	0.433673	0.75	0.275862	0.5	NA	NA	NA	NA	0.52381	0.385113	NA	0.5	0.231481	0.444444	0.096652	0.193548	0.237705	0.00193798	0.340678	0.323869	0.307876	0.09375	0.0737705	0.0988372	0	0.388889	0	0	0.25	0.0959596	0.343434	0.324176	0.228155
9	101916165	T	G	rs1590	TGFBR1	single nucleotide variant	NM_004612.3(TGFBR1):c.*4578T>G	Loeys-Dietz syndrome;Loeys-Dietz syndrome 1;Thoracic aortic aneurysm and aortic dissection	Onge(HuOrigin)	0.338751	0.524886	Benign	G	NA	NA	NA	NA	NA	NA	NA	NA	NA	NA	NA	NA	NA	NA	NA	NA	NA	0.311694	0.275943	0.260417	0.469716	0.204781	0.27219	0.259225	0.3125	0.393443	0.313953	0.526882	0.222222	0.504854	0.380952	0.324468	0.247475	0.262626	0.318681	0.373786
16	75574030	C	T	rs2242406	TMEM231	single nucleotide variant	NM_001077416.2(TMEM231):c.972G>A (p.Val324=)	not specified	eas_kor(gnomAD.exomes)	0.266514	0.524715	Benign	T	0.0578512	0.0493012	0.0548705	0.0537382	0.0188923	0.422361	0.0868484	0.754136	0.791229	0.686567	0.744659	0.0669926	0.0524082	0.0837716	0.0514763	0.277435	0.138178	0.0157218	0.356974	0.0896552	0.731518	0.0578251	0.0482888	0.107537	0.00520833	0.057377	0.430233	0.580645	0.0505051	0.752427	0.771429	0.281915	0	0.040404	0.0384615	0.330097
17	42327493	G	T	rs2072081	SLC4A1	single nucleotide variant	NM_000342.3(SLC4A1):c.*333C>A	Distal Renal Tubular Acidosis, Dominant;Hemolytic anemia;Spherocytosis, Dominant	Karitiana(HGDP)	0.403862	0.524709	Likely_benign	T	NA	NA	NA	NA	NA	NA	NA	NA	NA	NA	NA	NA	NA	NA	NA	NA	NA	0.527547	0.300708	0.389655	0.735446	0.220749	0.272887	0.283333	0.578125	0.508197	0.290698	0.768817	0.277778	0.737864	0.714286	0.345745	0.550505	0.207071	0.181319	0.325243
14	64656855	T	C	rs2256191	SYNE2	single nucleotide variant	NM_182914.2(SYNE2):c.17938T>C (p.Leu5980=)	Emery-Dreifuss muscular dystrophy;Emery-Dreifuss muscular dystrophy 5, autosomal dominant;not specified	Masai(HuOrigin)	0.43375	0.524583	Benign	C	0.297521	0.353179	0.416652	0.360702	0.753724	0.357097	0.49236	0.382615	0.382137	0.371622	0.382855	0.285873	0.355282	0.386807	0.322563	0.391956	0.37101	0.74747	0.375887	0.472414	0.382732	0.266417	0.341698	0.366728	0.703125	0.729508	0.337209	0.322581	0.363636	0.407767	0.4	0.462766	0.833333	0.343434	0.296703	0.412621
17	73937665	T	C	rs3643	ACOX1	single nucleotide variant	NM_004035.6(ACOX1):c.*5164A>G	Pseudoneonatal adrenoleukodystrophy	LWK(HapMap)	0.189075	0.524561	Benign	C	NA	NA	NA	NA	NA	NA	NA	NA	NA	NA	NA	NA	NA	NA	NA	NA	NA	0.561882	0.100711	0.12069	0.0436457	0.046659	0.0762998	0.108456	0.572917	0.491803	0.139535	0.0483871	0.0808081	0.0339806	0.0571429	0.143617	0.666667	0.030303	0.0659341	0.121359
17	1640793	C	T	rs8077638	WDR81	single nucleotide variant	NM_001163809.1(WDR81):c.5640C>T (p.Ser1880=)	not specified	Papuan(HGDP)	0.240155	0.52455	Likely_benign	T	0.24359	0.213921	0.201016	0.209472	0.218483	0.279868	0.190586	0.17423	0.14413	0.177632	0.182165	0.214926	0.213631	0.210347	0.223619	0.383833	0.227228	0.220433	0.28066	0.189655	0.170308	0.212147	0.218823	0.223757	0.244792	0.229508	0.284884	0.172043	0.247475	0.15534	0.166667	0.255319	0.19697	0.151515	0.247253	0.432039
22	19867771	C	T	rs1139795	TXNRD2	single nucleotide variant	NM_006440.4(TXNRD2):c.1206G>A (p.Pro402=)	Cardiovascular phenotype;not specified	LWK(1KG_phase3)	0.198066	0.524156	Benign	T	0.115385	0.158603	0.203733	0.167543	0.564949	0.147487	0.201497	0.0291699	0.0379979	0.0367647	0.026698	0.0906414	0.161938	0.212822	0.137757	0.192333	0.18108	0.545287	0.159198	0.248276	0.0250643	0.0903857	0.151098	0.169742	0.578125	0.581967	0.162791	0.016129	0.19697	0.0291262	0.0333333	0.244681	0.681818	0.0757576	0.142857	0.262136
4	184600601	A	G	rs4241779	TRAPPC11	single nucleotide variant	NM_021942.5(TRAPPC11):c.927A>G (p.Ala309=)	not specified	Karitiana(HuOrigin);Karitiana(HGDP)	0.475897	0.524103	Benign	G	0.4125	0.431111	0.388298	0.421063	0.621203	0.517316	0.429586	0.51129	0.49655	0.467105	0.515662	0.475098	0.424968	0.386807	0.439887	0.309884	0.435041	0.613338	0.534279	0.4	0.509032	0.476382	0.439107	0.455882	0.645833	0.57377	0.337209	0.532258	0.368687	0.490291	0.519048	0.468085	0.722222	0.459596	0.434066	0.242718
3	172766822	G	A	rs508508	SPATA16	single nucleotide variant	NM_031955.5(SPATA16):c.675C>T (p.Ser225=)	Spermatogenic Failure	Ju_hoan_North(HuOrigin)	0.157805	0.524013	Likely_benign	A	0.107438	0.147523	0.1475	0.14373	0.227871	0.166136	0.0992654	0.141946	0.194665	0.157895	0.127931	0.208827	0.148447	0.125937	0.158638	0.128661	0.153595	0.230575	0.165485	0.110345	0.142031	0.221774	0.14447	0.183824	0.197917	0.172131	0.156977	0.0430108	0.106061	0.242718	0.138095	0.175532	0.242424	0.176768	0.131868	0.126214
10	23482850	G	A	rs10828415	PTF1A	single nucleotide variant	NM_178161.2(PTF1A):c.*15G>A	Permanent neonatal diabetes mellitus	Han(HuOrigin)	0.218464	0.52396	Benign	A	0.0371901	0.0443068	0.0824052	0.0501521	0.0865432	0.219806	0.108328	0.691572	0.666317	0.684211	0.698336	0.0913502	0.0498547	0.059176	0.0432968	0.0893231	0.111438	0.0836017	0.20283	0.100694	0.73072	0.0999424	0.0450889	0.0799632	0.0729167	0.0491803	0.104651	0.731183	0.0757576	0.728155	0.67619	0.101064	0.10101	0.0858586	0.043956	0.0728155
1	179520050	T	C	rs2274622	NPHS2	single nucleotide variant	NM_014625.3(NPHS2):c.*258A>G	Nephrotic syndrome, idiopathic, steroid-resistant;Steroid-resistant nephrotic syndrome	Papuan(HuOrigin)	0.333384	0.523759	Likely_benign	C	NA	NA	NA	NA	NA	NA	NA	NA	NA	NA	NA	NA	NA	NA	NA	NA	NA	0.13003	0.308511	0.262069	0.337629	0.218768	0.277193	0.27114	0.104167	0.147541	0.372093	0.306452	0.272727	0.364078	0.457143	0.308511	0.0656566	0.287879	0.324176	0.407767
3	46904708	C	A	rs936175	MYL3	single nucleotide variant	NM_000258.2(MYL3):c.129+44G>T	not specified	YRI(HapMap)	0.333658	0.523485	Benign	A	0.0916667	0.114214	0.132363	0.119229	0.695706	0.129344	0.229791	0.230836	0.214248	0.243421	0.235094	0.136956	0.118712	0.131184	0.118007	0.394885	0.173629	0.701336	0.159198	0.213793	0.216945	0.135501	0.11822	0.189687	0.697917	0.680328	0.418605	0.263441	0.126263	0.223301	0.271429	0.18617	0.823232	0.146465	0.10989	0.436893
11	65631973	G	A	rs630303	EFEMP2	single nucleotide variant	NM_016938.4(EFEMP2):c.*2416C>T	not specified	Papuan(HuOrigin)	0.476705	0.523295	Benign	A	0.720833	0.666438	0.700331	0.676182	0.253909	0.370976	0.636165	0.32027	0.312729	0.309211	0.322386	0.702058	0.673999	0.698723	0.669093	0.634335	0.618357	0.257021	0.401891	0.67931	0.305019	0.701093	0.675676	0.613678	0.25	0.360656	0.593023	0.333333	0.636364	0.271845	0.285714	0.494681	0.171717	0.646465	0.692308	0.650485
1	196642233	G	A	rs800292	CFH	single nucleotide variant	NM_000186.3(CFH):c.184G>A (p.Val62Ile)	Age-related macular degeneration 4;Atypical hemolytic uremic syndrome;Basal laminar drusen;Macular degeneration;Mesangiocapillary glomerulonephritis, type II;not provided	Mandenka(HGDP)	0.385995	0.523095	Benign	A	0.247899	0.229875	0.220349	0.234189	0.725373	0.375051	0.268664	0.42056	0.422854	0.388158	0.420297	0.30207	0.235003	0.210586	0.252967	0.314363	0.27054	0.719456	0.364066	0.244828	0.419146	0.291883	0.238695	0.315838	0.723958	0.680328	0.465116	0.494624	0.217172	0.364078	0.433333	0.382979	0.80303	0.318182	0.28022	0.281553
10	97385242	A	G	rs10509688	ALDH18A1	single nucleotide variant	NM_002860.3(ALDH18A1):c.1153-30T>C	not specified	Onge(HuOrigin)	0.249931	0.522796	Benign	G	0.136364	0.16413	0.116739	0.15874	0.0728795	0.114373	0.117864	0.490582	0.465165	0.453333	0.497709	0.187635	0.164977	0.132309	0.198499	0.159455	0.162684	0.0707873	0.118203	0.127586	0.494179	0.204729	0.161658	0.174677	0.0833333	0.0491803	0.174419	0.55914	0.19697	0.529126	0.533333	0.0638298	0.030303	0.232323	0.142857	0.174757
3	57494138	A	C	rs6445902	DNAH12	single nucleotide variant	NM_198564.3(DNAH12):c.672T>G (p.Asp224Glu)	not specified	BiakaPygmy(HGDP)	0.191527	0.522759	Benign	C	0.214286	0.182025	0.16133	0.18156	0.472733	0.112571	0.198768	0.0573291	0.0680862	0.0657895	0.0543463	0.155341	0.177622	0.180587	0.17263	0.188504	0.172908	0.480645	0.150474	0.234483	0.0570513	0.145905	0.180005	0.193727	0.40625	0.491803	0.156977	0.0860215	0.161616	0.0582524	0.0571429	0.170213	0.560606	0.136364	0.197802	0.184466
16	2162361	A	G	rs2549677	PKD1	single nucleotide variant	NM_001009944.2(PKD1):c.3275T>C (p.Met1092Thr)	Polycystic kidney disease, adult type;not specified	GWD(1KG_phase3)	0.136677	0.522615	Benign	G	0.0802469	0.0848228	0.0737077	0.0685222	0.396813	0.0671388	0.104917	5.59534e-05	0.000262605	0	0	0.0398536	0.0673793	0.0636704	0.0351855	0.020411	0.0886239	0.468287	0.0957447	0.151724	0.000641026	0.0668203	0.0895338	0.106618	0.505208	0.418033	0	0	0.0909091	0	0	0.202128	0.494949	0.0757576	0.0824176	0.0145631
9	101912471	A	G	rs334348	TGFBR1	single nucleotide variant	NM_004612.3(TGFBR1):c.*884A>G	Loeys-Dietz syndrome;Loeys-Dietz syndrome 1;Thoracic aortic aneurysm and aortic dissection	Onge(HuOrigin)	0.341265	0.522371	Benign	G	NA	NA	NA	NA	NA	NA	NA	NA	NA	NA	NA	NA	NA	NA	NA	NA	NA	0.319582	0.277251	0.262069	0.469794	0.204899	0.271836	0.256458	0.317708	0.393443	0.313953	0.526882	0.222222	0.504854	0.380952	0.324468	0.257576	0.262626	0.318681	0.373786
2	109352542	G	A	rs826577	RANBP2	single nucleotide variant	NM_006267.4(RANBP2):c.637-18G>A	not specified	GWD(1KG_phase3)	0.301003	0.522006	Benign	A	0.179167	0.243247	0.247987	0.239316	0.720043	0.150988	0.235294	0.0689013	0.0978432	0.138158	0.0604726	0.186787	0.233039	0.245031	0.201278	0.336405	0.244785	0.711636	0.170616	0.289655	0.0525641	0.200462	0.239017	0.267956	0.739583	0.770492	0.313953	0.0752688	0.227273	0.0485437	0.104762	0.260638	0.808081	0.191919	0.225275	0.504854
1	201301696	G	A	rs12143423	PKP1	single nucleotide variant	NM_001005337.2(PKP1):c.*2527G>A	Ectodermal dysplasia skin fragility syndrome	Mandenka(HGDP)	0.228107	0.521893	Benign	A	NA	NA	NA	NA	NA	NA	NA	NA	NA	NA	NA	NA	NA	NA	NA	NA	NA	0.572415	0.158019	0.289655	0.062982	0.209343	0.187589	0.20864	0.572917	0.52459	0.226744	0.0376344	0.151515	0.0631068	0.0761905	0.228723	0.646465	0.252525	0.186813	0.276699
1	159175354	G	A	rs12075	ACKR1	single nucleotide variant	NM_002036.3(ACKR1):c.125G>A (p.Gly42Asp)	DUFFY BLOOD GROUP SYSTEM, FYA/FYB POLYMORPHISM	ESN(1KG_phase3);GWD(1KG_phase3);LWK(1KG_phase3);MSL(1KG_phase3);YRI(1KG_phase3);LWK(HapMap);YRI(HapMap);BantuKenya(HGDP);BiakaPygmy(HGDP);Mandenka(HGDP);MbutiPygmy(HGDP);Yoruba(HGDP)	0.478195	0.521805	Benign	A	0.57438	0.583899	0.614313	0.572629	0.933317	0.434351	0.552077	0.0498097	0.0678366	0.0921053	0.0445908	0.511187	0.57894	0.557303	0.565109	0.383145	0.560359	0.924437	0.479953	0.541379	0.0442875	0.5187	0.578178	0.54797	0.963542	0.852459	0.354651	0.0483871	0.570707	0.0679612	0.0666667	0.601064	1	0.545455	0.582418	0.38835
9	107548566	T	C	rs2066881	ABCA1	single nucleotide variant	NM_005502.3(ABCA1):c.6401+13A>G	Familial High Density Lipoprotein Deficiency;Tangier disease	Onge(HuOrigin)	0.114939	0.521425	Benign	C	0.0289256	0.0597508	0.0526408	0.0558252	0.0180945	0.0250318	0.0446961	0.400283	0.31978	0.351351	0.422079	0.0373735	0.0568679	0.0629685	0.0549514	0.174779	0.0653168	0.0144595	0.0318396	0.0448276	0.423969	0.0356937	0.0530274	0.0625	0.015625	0.0163934	0.267442	0.403226	0.0555556	0.407767	0.5	0.0159574	0	0.030303	0.0604396	0.213592
17	1576369	C	T	rs11078563	PRPF8	single nucleotide variant	NM_006445.3(PRPF8):c.3774+6G>A	Retinitis Pigmentosa, Dominant	LWK(1KG_phase3)	0.226221	0.521253	Likely_benign	T	0.2625	0.20893	0.22171	0.21803	0.573464	0.1114	0.290524	0.0701926	0.0497643	0.0466667	0.0758501	0.190835	0.212344	0.24512	0.203193	0.166177	0.216194	0.56924	0.14033	0.365517	0.0661954	0.189914	0.215649	0.212316	0.598958	0.52459	0.127907	0.0967742	0.212121	0.101942	0.0904762	0.159574	0.631313	0.146465	0.225275	0.23301
2	227886773	A	G	rs3752895	COL4A4	single nucleotide variant	NM_000092.4(COL4A4):c.4207T>C (p.Ser1403Pro)	Alport syndrome;not provided;not specified	MbutiPygmy(HGDP)	0.479089	0.520911	Benign	G	0.475207	0.419186	0.379867	0.424055	0.642256	0.538283	0.508742	0.396028	0.420639	0.402985	0.389261	0.495594	0.421847	0.395567	0.444044	0.55896	0.456529	0.62842	0.524823	0.468966	0.361111	0.492206	0.440783	0.494475	0.682292	0.606557	0.604651	0.446237	0.474747	0.475728	0.357143	0.473404	0.772727	0.505051	0.434066	0.538835
12	112037000	G	C	rs695871	ATXN2	single nucleotide variant	NM_002973.3(ATXN2):c.319C>G (p.Leu107Val)	Spinocerebellar ataxia 2;not specified	nfe_seu(gnomAD.exomes);fin(gnomAD.exomes);oth(gnomAD.exomes)	0.479342	0.520658	Likely_benign	C	NA	0.702899	1	0.919355	NA	0	NA	NA	NA	NA	NA	1	0.778846	NA	NA	0.5	1	0.313482	0.567365	0.860656	0.0752618	0.815655	0.786008	0.705184	0.255208	0.254098	0.656977	0.112903	0.79798	0.0679612	0.0904762	0.547872	0.262626	0.808081	0.752747	0.713592
11	67227827	A	G	rs2514262	CABP4	single nucleotide variant	NM_145200.3(CABP4):c.*1697A>G	Congenital Stationary Night Blindness, Recessive	MSL(1KG_phase3)	0.132379	0.520562	Benign	G	NA	NA	NA	NA	NA	NA	NA	NA	NA	NA	NA	NA	NA	NA	NA	NA	NA	0.488029	0.0341981	0	0	0	0.00253181	0.0303309	0.541667	0.459016	0	0	0	0	0	0.0319149	0.510101	0.00505051	0	0
9	4576680	T	C	rs301430	SLC1A1	single nucleotide variant	NM_004170.5(SLC1A1):c.1110T>C (p.Thr370=)	Dicarboxylic aminoaciduria	MbutiPygmy(HGDP)	0.402527	0.52055	Benign	C	0.289256	0.292741	0.247826	0.288711	0.507507	0.381671	0.221925	0.61032	0.634102	0.546053	0.604701	0.45602	0.291883	0.270615	0.315844	0.371627	0.32866	0.508391	0.370853	0.253472	0.617571	0.459101	0.297015	0.354244	0.46875	0.483607	0.465116	0.505376	0.292929	0.626214	0.62381	0.382979	0.5	0.484848	0.285714	0.398058
19	17958777	T	C	rs7254346	JAK3	single nucleotide variant	NM_000215.3(JAK3):c.-36A>G	Severe Combined Immune Deficiency	MSL(1KG_phase3)	0.221007	0.52017	Benign	C	NA	NA	NA	NA	NA	NA	NA	NA	NA	NA	NA	NA	NA	NA	NA	NA	NA	0.558046	0.104019	0.103448	0.216667	0.0342545	0.0749253	0.095941	0.630208	0.491803	0.122093	0.22043	0.0606061	0.26699	0.27619	0.196809	0.712121	0.0151515	0.10989	0.106796
6	24828490	C	T	rs9461073	RIPOR2	single nucleotide variant	NM_014722.4(RIPOR2):c.2603G>A (p.Arg868Gln)	not specified	MbutiPygmy(HGDP)	0.210807	0.519962	Benign	T	0.123853	0.204136	0.182979	0.188198	0.357106	0.211435	0.229537	0.197388	0.236871	0.216216	0.189045	0.190081	0.197207	0.160517	0.205613	0.145505	0.19536	0.354301	0.212264	0.22069	0.197555	0.191244	0.183654	0.202206	0.338542	0.311475	0.139535	0.123656	0.156566	0.242718	0.2	0.170213	0.393939	0.146465	0.241758	0.11165
9	130984755	C	T	rs3003609	DNM1	single nucleotide variant	NM_004408.3(DNM1):c.1008C>T (p.Phe336=)	Neurodevelopmental;not provided;not specified	Karitiana(HuOrigin);Karitiana(HGDP)	0.480079	0.519921	Benign	T	0.595041	0.543768	0.523068	0.537175	0.114608	0.707323	0.442877	0.598771	0.595076	0.605263	0.599681	0.534205	0.542982	0.575678	0.553555	0.582087	0.542293	0.115774	0.635613	0.444828	0.603093	0.542314	0.543668	0.531423	0.0885417	0.188525	0.587209	0.602151	0.565657	0.572816	0.685714	0.537234	0.020202	0.59596	0.494505	0.61165
4	155671626	T	G	rs12507608	LRAT	single nucleotide variant	NM_004744.4(LRAT):c.*1338T>G	Leber congenital amaurosis;Retinal dystrophy;Retinitis Pigmentosa, Recessive	PEL(1KG_phase3)	0.115606	0.519689	Likely_benign	G	NA	NA	NA	NA	NA	NA	NA	NA	NA	NA	NA	NA	NA	NA	NA	NA	NA	0.0619256	0.306147	0.113793	0.0301282	0.131228	0.0966337	0.135688	0.0520833	0.0983607	0.186047	0.0537634	0.0858586	0.00485437	0.0142857	0.292553	0.0555556	0.136364	0.032967	0.223301
14	65263300	C	T	rs229587	SPTB	single nucleotide variant	NM_001355436.2(SPTB):c.1316G>A (p.Ser439Asn)	Elliptocytosis;Spherocytosis, Dominant;not specified	Taa_West(HuOrigin)	0.41793	0.51957	Likely_benign	T	0.305785	0.332457	0.392994	0.348767	0.642857	0.270641	0.419444	0.322151	0.302252	0.315789	0.327486	0.321514	0.342326	0.394007	0.323383	0.479617	0.369176	0.63374	0.295991	0.424138	0.344072	0.327089	0.32952	0.353591	0.640625	0.672131	0.476744	0.360215	0.363636	0.34466	0.357143	0.319149	0.752525	0.343434	0.258242	0.485437
7	4823971	C	T	rs17135121	AP5Z1	single nucleotide variant	NM_014855.3(AP5Z1):c.759C>T (p.Ser253=)	Spastic Paraplegia, Recessive;not specified	GWD(1KG_phase3)	0.179599	0.519516	Benign	T	0.0879121	0.104772	0.0997017	0.0987786	0.534297	0.0671514	0.157052	0.0602758	0.0720087	0.111111	0.0565872	0.0568464	0.0994777	0.0886644	0.0913672	0.214516	0.119759	0.51617	0.0874704	0.158621	0.0618557	0.0505488	0.0930931	0.104824	0.625	0.47541	0.267442	0.0376344	0.0909091	0.0291262	0.0666667	0.101064	0.59596	0.030303	0.142857	0.257282
16	15865472	G	A	rs4781689	MYH11	single nucleotide variant	NM_002474.2(MYH11):c.987C>T (p.Thr329=)	Aortic aneurysm, familial thoracic 4;Cardiovascular phenotype;Thoracic aortic aneurysm and aortic dissection;not specified	Pima(HGDP)	0.087633	0.51951	Likely_benign	A	0.123967	0.0970913	0.0755521	0.104628	0.0175957	0.208478	0.0769002	0.00184843	0.00733368	0	0.000415973	0.169593	0.0995604	0.107116	0.10711	0.10047	0.0979146	0.0184715	0.1875	0.0586207	0.00192555	0.167245	0.110145	0.0988909	0	0.0327869	0.0697674	0	0.106061	0	0	0.117021	0	0.136364	0.131868	0.11165
15	99478225	G	A	rs2229765	IGF1R	single nucleotide variant	NM_000875.4(IGF1R):c.3129G>A (p.Glu1043=)	Insulin-like growth factor 1 resistance to;not specified	Onge(HuOrigin)	0.344227	0.519409	Benign	A	0.4375	0.448395	0.419902	0.458035	0.29402	0.335329	0.47559	0.350952	0.343897	0.263158	0.353745	0.413062	0.452114	0.45015	0.465604	0.30177	0.411746	0.293671	0.338863	0.403448	0.340851	0.414072	0.452839	0.443015	0.265625	0.303279	0.273256	0.322581	0.419192	0.436893	0.342857	0.37766	0.207071	0.429293	0.445055	0.320388
3	33161898	C	T	rs4076086	CRTAP	single nucleotide variant	NM_006371.4(CRTAP):c.534C>T (p.Asp178=)	Osteogenesis Imperfecta, Recessive;Osteogenesis imperfecta type 7;not specified	Chukchis(HuOrigin)	0.285153	0.519195	Benign	T	0.0909091	0.0830012	0.0800945	0.0882238	0.319636	0.160412	0.122145	0.582309	0.652436	0.631579	0.563228	0.192553	0.0871607	0.088147	0.0952545	0.175867	0.126593	0.324822	0.153664	0.12069	0.575193	0.184407	0.0911273	0.14733	0.291667	0.336066	0.267442	0.516129	0.106061	0.57767	0.638095	0.12766	0.282828	0.20202	0.0769231	0.160194
20	62564363	A	G	rs61744085	DNAJC5	single nucleotide variant	NM_025219.2(DNAJC5):c.*1442A>G	Neuronal Ceroid-Lipofuscinosis, Recessive	Ju_hoan_North(HuOrigin)	0.071853	0.519056	Likely_benign	G	NA	NA	NA	NA	NA	NA	NA	NA	NA	NA	NA	NA	NA	NA	NA	NA	NA	0.0885931	0.0437352	0.0724138	0.00320513	0.176657	0.0925013	0.124309	0.0833333	0.0983607	0.00581395	0.00537634	0.0808081	0	0.0047619	0.037234	0.0606061	0.121212	0.0879121	0.0436893
4	79300993	G	A	rs12512164	FRAS1	single nucleotide variant	NM_025074.6(FRAS1):c.3406G>A (p.Glu1136Lys)	Cryptophthalmos syndrome;not specified	Karitiana(HGDP)	0.230953	0.519047	Benign	A	0.347107	0.267972	0.267958	0.280037	0.141122	0.36614	0.262488	0.21629	0.234892	0.231343	0.211097	0.311229	0.278843	0.317806	0.295159	0.188027	0.269065	0.145996	0.321513	0.272414	0.194194	0.315092	0.289374	0.280443	0.114583	0.155738	0.156977	0.215054	0.247475	0.199029	0.209524	0.292553	0.116162	0.282828	0.285714	0.228155
7	42000924	C	T	rs3735361	GLI3	single nucleotide variant	NM_000168.5(GLI3):c.*3004G>A	Greig cephalopolysyndactyly syndrome;Pallister-Hall syndrome;Polydactyly	Nganasans(HuOrigin)	0.344982	0.518655	Benign	T	NA	NA	NA	NA	NA	NA	NA	NA	NA	NA	NA	NA	NA	NA	NA	NA	NA	0.0824719	0.367612	0.365517	0.602713	0.332758	0.355953	0.327206	0.0729167	0.0901639	0.401163	0.548387	0.358586	0.606796	0.595238	0.37234	0.0252525	0.30303	0.357143	0.38835
14	105175085	A	G	rs11850821	INF2	single nucleotide variant	NM_022489.3(INF2):c.1949+16A>G	not specified	ESN(1KG_phase3)	0.138148	0.518418	Benign	G	0.101695	0.0925599	0.123815	0.0997575	0.504086	0.072	0.112196	0.0139693	0.0120545	0.00746269	0.0145527	0.0533327	0.0937483	0.120858	0.0724996	0.0848964	0.115321	0.505416	0.0874704	0.127586	0.0141026	0.0532834	0.0963136	0.107934	0.515625	0.516393	0.0232558	0.00537634	0.111111	0.0145631	0.00952381	0.101064	0.656566	0.0656566	0.0769231	0.140777
17	1584324	A	G	rs7503397	PRPF8	single nucleotide variant	NM_006445.3(PRPF8):c.891T>C (p.Asn297=)	Retinitis Pigmentosa, Dominant	LWK(1KG_phase3)	0.229132	0.518343	Likely_benign	G	0.268595	0.210015	0.222918	0.219278	0.574443	0.11254	0.290675	0.0692692	0.0487166	0.0460526	0.0749549	0.191195	0.213634	0.246812	0.204806	0.160547	0.217172	0.569617	0.13948	0.364583	0.0657216	0.190242	0.215707	0.215074	0.598958	0.52459	0.122093	0.0967742	0.212121	0.101942	0.0904762	0.159574	0.631313	0.146465	0.225275	0.228155
17	17697099	G	A	rs11078398	RAI1	single nucleotide variant	NM_030665.3(RAI1):c.837G>A (p.Gln279=)	Neurodevelopmental;not specified	CHD(HapMap)	0.353269	0.518291	Benign	A	0.0555556	0.0282768	0.0519424	0.0416271	0.054138	0.0366591	0.0208333	0.0812468	0.043701	0.45098	0.0882543	0.0863748	0.0375101	0.0754824	0.0359656	0.0610162	0.0389525	0.000700117	0.0120773	0.0277778	0.00453368	0	0.0152016	0.0285714	0.421875	0.352459	0.767442	0.827957	0.287879	0.839806	0.857143	0.462766	0.414141	0.328283	0.357143	0.742718
13	28196011	C	A	rs2232677	POLR1D	single nucleotide variant	NM_015972.3(POLR1D):c.-110C>A	Treacher Collins Syndrome, Dominant	BTQ(AAGC)	0.06531	0.518023	Likely_benign	A	NA	NA	NA	NA	NA	NA	NA	NA	NA	NA	NA	NA	NA	NA	NA	NA	NA	0.054428	0.0273159	0.114583	0.0198718	0.0762319	0.0763463	0.0583333	0.0572917	0.0409836	0.0581395	0.0537634	0.0505051	0.0145631	0.0142857	0.0425532	0.0656566	0.0606061	0.0824176	0.0631068
17	1585130	A	G	rs11559305	PRPF8	single nucleotide variant	NM_006445.3(PRPF8):c.637T>C (p.Leu213=)	Retinitis Pigmentosa, Dominant	LWK(1KG_phase3)	0.194279	0.517843	Likely_benign	G	0.219008	0.173357	0.16771	0.177116	0.532981	0.0941891	0.219686	0.0688812	0.0487166	0.0460526	0.0744592	0.172981	0.174868	0.189422	0.175901	0.14855	0.18361	0.528806	0.114929	0.274306	0.0658915	0.172235	0.181055	0.197974	0.583333	0.5	0.110465	0.0967742	0.171717	0.101942	0.0904762	0.138298	0.590909	0.106061	0.197802	0.208738
11	119175075	C	A	rs2509671	CBL	single nucleotide variant	NM_005188.3(CBL):c.*4584C>A	Noonan-Like Syndrome Disorder	Damara(HuOrigin)	0.398922	0.517745	Benign	A	NA	NA	NA	NA	NA	NA	NA	NA	NA	NA	NA	NA	NA	NA	NA	NA	NA	0.666667	0.243499	0.368966	0.374515	0.305075	0.294837	0.325967	0.708333	0.639344	0.22093	0.306452	0.262626	0.402913	0.314286	0.308511	0.747475	0.292929	0.32967	0.18932
11	46898771	T	C	rs6485702	LRP4	single nucleotide variant	NM_002334.3(LRP4):c.3256A>G (p.Ile1086Val)	Syndactyly Cenani Lenz type;not specified	Papuan(HGDP)	0.48242	0.51758	Benign	C	0.632231	0.664451	0.719402	0.671964	0.196174	0.487598	0.731388	0.284006	0.293085	0.296053	0.281475	0.630648	0.671962	0.709738	0.659689	0.671642	0.653583	0.20157	0.526005	0.696552	0.282413	0.625144	0.660401	0.634686	0.1875	0.180328	0.656977	0.247312	0.707071	0.34466	0.261905	0.579787	0.0959596	0.616162	0.626374	0.728155
19	1218523	G	T	rs2075604	STK11	single nucleotide variant	NM_000455.4(STK11):c.374+24G>T	not specified	Papuan(HGDP)	0.24738	0.517326	Benign	T	0.1	0.106256	0.117974	0.103104	0.37612	0.21506	0.0972638	0.418478	0.41326	0.424242	0.419846	0.0759278	0.104278	0.105283	0.0963697	0.140625	0.143497	0.37316	0.200946	0.113793	0.392397	0.0803109	0.0975736	0.104244	0.395833	0.368852	0.168605	0.44086	0.0707071	0.354369	0.452381	0.191489	0.378788	0.0656566	0.0934066	0.135922
11	111896324	C	T	rs2303436	DLAT	single nucleotide variant	NM_001931.4(DLAT):c.128C>T (p.Ala43Val)	Pyruvate dehydrogenase complex deficiency;not provided;not specified	Nganasans(HuOrigin)	0.391911	0.51718	Benign	T	0.403361	0.359112	0.32229	0.352159	0.22324	0.408615	0.291409	0.59296	0.578575	0.609589	0.596608	0.433713	0.35258	0.323282	0.358604	0.400568	0.353663	0.225558	0.397163	0.289655	0.58344	0.425937	0.368318	0.363216	0.1875	0.237705	0.395349	0.586022	0.262626	0.601942	0.57619	0.244681	0.181818	0.363636	0.379121	0.359223
11	64369540	G	A	rs476037	SLC22A12	single nucleotide variant	NM_144585.3(SLC22A12):c.*517G>A	Familial renal hypouricemia	Papuan(HGDP)	0.188827	0.517056	Benign	A	NA	NA	NA	NA	NA	NA	NA	NA	NA	NA	NA	NA	NA	NA	NA	NA	NA	0.0663289	0.271868	0.148276	0.305412	0.131275	0.102708	0.114603	0.046875	0.0737705	0.25	0.231183	0.116162	0.354369	0.280952	0.223404	0.0606061	0.0858586	0.0714286	0.174757
8	17918986	A	G	rs17515291	ASAH1	single nucleotide variant	NM_004315.5(ASAH1):c.752-19T>C	not provided;not specified	Pima(HGDP)	0.304473	0.516956	Benign	G	0.2875	0.262609	0.272355	0.2548	0.108519	0.429014	0.303851	0.296063	0.315348	0.368421	0.290193	0.19202	0.252236	0.282234	0.220218	0.36486	0.267385	0.114634	0.398585	0.306897	0.293325	0.200749	0.258444	0.24262	0.0989583	0.131148	0.319767	0.322581	0.247475	0.281553	0.280952	0.303191	0.0606061	0.166667	0.324176	0.417476
2	211456637	A	G	rs1047883	CPS1	single nucleotide variant	NM_001875.4(CPS1):c.1030A>G (p.Thr344Ala)	Congenital hyperammonemia, type I;not provided;not specified	BTQ(AAGC)	0.358214	0.516786	Benign	G	0.479339	0.559884	0.616693	0.564129	0.613443	0.470873	0.618039	0.547507	0.523873	0.552632	0.553653	0.634062	0.566118	0.591216	0.55458	0.600818	0.578583	0.619935	0.486936	0.559441	0.555263	0.622979	0.549719	0.581006	0	0	0	0	0	0	0	0	0	0	0	0
4	187004074	C	T	rs3775291	TLR3	single nucleotide variant	NM_003265.2(TLR3):c.1234C>T (p.Leu412Phe)	Herpes simplex encephalitis 2;Human immunodeficiency virus type 1, susceptibility to;not specified	Onge(HuOrigin)	0.256109	0.516618	Likely_benign	T	0.272727	0.298315	0.284468	0.294982	0.0647037	0.298755	0.255858	0.340461	0.283918	0.243421	0.356469	0.324993	0.297678	0.295131	0.306151	0.23843	0.288285	0.0678686	0.292654	0.272414	0.348191	0.321922	0.299727	0.299815	0.0416667	0.0901639	0.273256	0.344086	0.373737	0.291262	0.328571	0.356383	0.00505051	0.333333	0.324176	0.242718
19	41211056	T	C	rs3865452	COQ8B	single nucleotide variant	NM_024876.3(COQ8B):c.521A>G (p.His174Arg)	not provided;not specified	Eskimo(HuOrigin);Karitiana(HuOrigin);Pima(HuOrigin);Karitiana(HGDP);Pima(HGDP)	0.483511	0.516489	Benign	C	0.54661	0.500335	0.470047	0.490858	0.369876	0.652261	0.431376	0.46408	0.477033	0.520833	0.46004	0.559234	0.489834	0.482923	0.479998	0.523726	0.492725	0.37681	0.635613	0.410345	0.47416	0.554435	0.493047	0.52302	0.390625	0.459016	0.505814	0.456989	0.479798	0.485437	0.409524	0.632979	0.267677	0.520202	0.472527	0.538835
11	125889464	A	G	rs75029148	CDON	single nucleotide variant	NM_016952.4(CDON):c.496+50T>C	not specified	BTQ(AAGC)	0.108531	0.516469	Benign	G	0.0785124	0.0829683	0.0883737	0.0824922	0.0268209	0.139881	0.106561	0.136136	0.124869	0.0986842	0.139509	0.127441	0.0858239	0.10907	0.09093	0.125483	0.0974812	0.0280331	0.143365	0.124138	0.11018	0.12356	0.088922	0.123616	0.0104167	0.0901639	0.104651	0.22043	0.0606061	0.0970874	0.119048	0.132979	0	0.106061	0.0879121	0.116505
4	155672155	C	T	rs78441257	LRAT	single nucleotide variant	NM_004744.4(LRAT):c.*1867C>T	Leber congenital amaurosis;Retinal dystrophy;Retinitis Pigmentosa, Recessive	PEL(1KG_phase3)	0.119036	0.516258	Likely_benign	T	NA	NA	NA	NA	NA	NA	NA	NA	NA	NA	NA	NA	NA	NA	NA	NA	NA	0.0646235	0.304965	0.113793	0.0294872	0.129758	0.096069	0.137201	0.0520833	0.114754	0.180233	0.0537634	0.0757576	0.00485437	0.0142857	0.292553	0.0555556	0.131313	0.032967	0.223301
2	113822168	C	T	rs2515406	IL36RN	single nucleotide variant	NM_012275.2(IL36RN):c.*1914C>T	Pustular psoriasis, generalized	Pima(HuOrigin);Pima(HGDP)	0.162495	0.516077	Likely_benign	T	NA	NA	NA	NA	NA	NA	NA	NA	NA	NA	NA	NA	NA	NA	NA	NA	NA	0.317795	0.216981	0.0862069	0.0558408	0.0677624	0.103453	0.095941	0.307292	0.270492	0.0988372	0.0537634	0.10101	0.0679612	0.047619	0.154255	0.237374	0.0555556	0.175824	0.0776699
1	207263829	A	G	rs6690037	C4BPB	single nucleotide variant	NM_001017365.2(C4BPB):c.232+3A>G	not specified	Pima(HGDP)	0.483979	0.516021	Benign	G	0.460526	0.501983	0.417522	0.496974	0.12694	0.616925	0.413727	0.772481	0.798646	0.793333	0.765456	0.527094	0.494556	0.442728	0.519787	0.534596	0.494427	0.124281	0.581368	0.393103	0.762211	0.530871	0.505339	0.502773	0.0989583	0.188525	0.569767	0.715054	0.469697	0.762136	0.761905	0.505319	0.040404	0.5	0.532967	0.504854
12	103246700	C	T	rs1042503	PAH	single nucleotide variant	NM_000277.2(PAH):c.735G>A (p.Val245=)	Phenylketonuria;Phenylketonuria;not provided;not specified	eas_jpn(gnomAD.exomes)	0.319544	0.515983	Benign	T	0.25	0.243498	0.2463	0.250695	0.042328	0.209722	0.284068	0.753238	0.767472	0.835526	0.748613	0.304854	0.251938	0.263493	0.268318	0.372934	0.281943	0.0495858	0.209906	0.298611	0.750323	0.305476	0.24659	0.27952	0.03125	0.0655738	0.424419	0.774194	0.272727	0.786408	0.752381	0.196809	0	0.30303	0.247253	0.417476
11	32410774	A	G	rs1799937	WT1	single nucleotide variant	NM_024426.5(WT1):c.1448-49T>C	not specified	Onge(HuOrigin)	0.484163	0.515837	Benign	G	0.231092	0.23297	0.253361	0.232393	0.531898	0.428865	0.333797	0.722059	0.701676	0.605263	0.728692	0.221871	0.229599	0.234633	0.209964	0.485329	0.303536	0.522476	0.403073	0.317241	0.743243	0.220207	0.225253	0.279006	0.588542	0.418033	0.552326	0.709677	0.252525	0.771845	0.72381	0.319149	0.656566	0.20202	0.291209	0.509709
1	207646898	T	C	rs4308977	CR2	single nucleotide variant	NM_001006658.2(CR2):c.1987T>C (p.Ser663Pro)	not specified	Mandenka(HGDP)	0.279742	0.515713	Benign	C	0.239669	0.32249	0.286499	0.301608	0.502646	0.169311	0.283529	0.111649	0.132476	0.138158	0.105865	0.230079	0.309183	0.261994	0.31216	0.230644	0.281557	0.491014	0.199292	0.303448	0.0929032	0.224784	0.294507	0.249081	0.46875	0.52459	0.133721	0.0645161	0.272727	0.116505	0.0809524	0.239362	0.555556	0.20202	0.373626	0.194175
4	155671105	A	G	rs78274322	LRAT	single nucleotide variant	NM_004744.4(LRAT):c.*817A>G	Leber congenital amaurosis;Retinal dystrophy;Retinitis Pigmentosa, Recessive	PEL(1KG_phase3)	0.11964	0.515655	Likely_benign	G	NA	NA	NA	NA	NA	NA	NA	NA	NA	NA	NA	NA	NA	NA	NA	NA	NA	0.064768	0.301663	0.113793	0.0302057	0.130685	0.0964833	0.136111	0.0520833	0.114754	0.186047	0.0537634	0.0757576	0.00485437	0.0142857	0.292553	0.0555556	0.136364	0.032967	0.223301
3	15492807	G	A	rs2278961	COLQ	single nucleotide variant	NM_005677.3(COLQ):c.*344C>T	Congenital Myasthenic Syndrome, Recessive	Papuan(HuOrigin)	0.448747	0.515539	Benign	A	NA	NA	NA	NA	NA	NA	NA	NA	NA	NA	NA	NA	NA	NA	NA	NA	NA	0.568553	0.388626	0.455172	0.512227	0.335348	0.406404	0.390625	0.588542	0.598361	0.389535	0.580645	0.383838	0.42233	0.504762	0.37234	0.59596	0.388889	0.417582	0.38835
6	42152333	T	C	rs3749920	GUCA1A;GUCA1B	single nucleotide variant	NM_002098.5(GUCA1B):c.*220A>G	Cone/cone-rod dystrophy;Retinitis Pigmentosa, Dominant	Onge(HuOrigin)	0.07547	0.515439	Likely_benign	C	NA	NA	NA	NA	NA	NA	NA	NA	NA	NA	NA	NA	NA	NA	NA	NA	NA	0.0666667	0.104953	0.0868056	0.0621795	0.0820853	0.0699351	0.0801105	0.0677083	0.0901639	0.00581395	0.145161	0.0505051	0.0631068	0.0571429	0.0797872	0.0656566	0.0454545	0.043956	0.0291262
1	156846233	G	A	rs6334	NTRK1	single nucleotide variant	NM_001012331.1(NTRK1):c.1656G>A (p.Gln552=)	Hereditary insensitivity to pain with anhidrosis;not specified	Koryaks(Estonian_Biocentre)	0.251231	0.515436	Benign	A	0.239316	0.220404	0.207687	0.210737	0.131387	0.21632	0.197894	0.349373	0.374804	0.391892	0.342186	0.201833	0.214428	0.224698	0.210857	0.235181	0.227747	0.136061	0.205189	0.222222	0.363578	0.206559	0.214583	0.209559	0.130208	0.0983607	0.302326	0.306452	0.181818	0.349515	0.314286	0.191489	0.136364	0.156566	0.274725	0.262136
6	36276000	A	C	rs12214296	PNPLA1	single nucleotide variant	NM_001145717.1(PNPLA1):c.*507A>C	Congenital ichthyosiform erythroderma	BTQ(AAGC)	0.109619	0.515381	Likely_benign	C	NA	NA	NA	NA	NA	NA	NA	NA	NA	NA	NA	NA	NA	NA	NA	NA	NA	0.110253	0.101655	0.175862	0.0198718	0.200173	0.154962	0.14564	0.09375	0.0983607	0.110465	0.0483871	0.141414	0.0242718	0.0142857	0.0797872	0.0606061	0.171717	0.164835	0.131068
9	129460914	A	G	rs10733682	LMX1B	single nucleotide variant	NM_002316.3(LMX1B):c.*2184A>G	Nail-patella syndrome	MbutiPygmy(HGDP)	0.484824	0.515176	Benign	G	NA	NA	NA	NA	NA	NA	NA	NA	NA	NA	NA	NA	NA	NA	NA	NA	NA	0.71906	0.373821	0.548276	0.241956	0.465666	0.51568	0.47698	0.75	0.647541	0.459302	0.27957	0.494949	0.23301	0.252381	0.37234	0.762626	0.474747	0.5	0.533981
1	231557255	C	G	rs12097901	EGLN1	single nucleotide variant	NM_022051.2(EGLN1):c.380G>C (p.Cys127Ser)	Familial erythrocytosis;Hemoglobin, high altitude adaptation	TBN(AAGC)	0.258037	0.51469	Benign	G	0	0.092233	0.111111	0.0944444	0.444444	0.223881	0.111111	0.509653	0.465	NA	0.537736	0.071616	0.0939227	0	0.25	0.328125	0.153226	0.311221	0.110831	0.0798611	0.432468	0.0821538	0.0663542	0.104869	0.354167	0.286885	0.261628	0.424731	0.0757576	0.485437	0.457143	0.138298	0.39899	0.0757576	0.0384615	0.15534
11	17452492	G	A	rs1799857	ABCC8	single nucleotide variant	NM_000352.4(ABCC8):c.1686C>T (p.His562=)	Hyperinsulinism, Dominant/Recessive;Permanent neonatal diabetes mellitus;Persistent hyperinsulinemic hypoglycemia of infancy;Transient Neonatal Diabetes, Dominant;not specified	Khomani(HuOrigin)	0.440028	0.514518	Benign	A	0.392562	0.455968	0.433491	0.447472	0.47843	0.308414	0.439623	0.283026	0.272584	0.269737	0.285933	0.412959	0.448226	0.438676	0.444581	0.503562	0.433116	0.478731	0.324292	0.410345	0.27635	0.397524	0.437809	0.430684	0.494792	0.434426	0.55814	0.327957	0.424242	0.291262	0.266667	0.393617	0.515152	0.358586	0.489011	0.456311
4	9909850	T	G	rs2280204	SLC2A9	single nucleotide variant	NM_020041.2(SLC2A9):c.1113+9A>C	Familial renal hypouricemia	Xuun(HuOrigin)	0.177899	0.514409	Benign	G	0.198347	0.156959	0.143379	0.154659	0.3544	0.242926	0.0987299	0.139034	0.103095	0.138158	0.148544	0.192809	0.15665	0.122564	0.167445	0.0948056	0.1627	0.349724	0.217857	0.0896552	0.138996	0.189298	0.16946	0.186004	0.447917	0.262295	0.0872093	0.172043	0.151515	0.145631	0.157143	0.164894	0.348485	0.247475	0.203297	0.0970874
17	11737941	C	T	rs3744586	DNAH9	single nucleotide variant	NM_001372.3(DNAH9):c.9247-14C>T	not specified	Pima(HuOrigin)	0.378491	0.514366	Benign	T	0.331933	0.334475	0.326882	0.336335	0.261344	0.453516	0.326196	0.430779	0.390436	0.36	0.442267	0.292498	0.327849	0.321536	0.308184	0.390165	0.35876	0.256617	0.455189	0.326389	0.438551	0.29729	0.332987	0.337638	0.270833	0.319672	0.418605	0.408602	0.282828	0.461165	0.442857	0.367021	0.217172	0.287879	0.340659	0.368932
15	40710723	G	A	rs2075624	IVD	single nucleotide variant	NM_002225.4(IVD):c.*261G>A	Isovaleryl-CoA dehydrogenase deficiency	Onge(HuOrigin)	0.394779	0.514312	Benign	A	NA	NA	NA	NA	NA	NA	NA	NA	NA	NA	NA	NA	NA	NA	NA	NA	NA	0.135287	0.43617	0.234266	0.646831	0.300058	0.24665	0.308824	0.119792	0.147541	0.505814	0.537634	0.186869	0.68932	0.552381	0.329787	0.0555556	0.29798	0.263736	0.490291
17	72306291	G	A	rs28725418	DNAI2	single nucleotide variant	NM_023036.4(DNAI2):c.1483G>A (p.Val495Ile)	Ciliary dyskinesia;not specified	GWD(1KG_phase3)	0.136212	0.514231	Benign	A	0.0344828	0.0513016	0.0633066	0.0529028	0.475257	0.0455519	0.0617419	0.0592112	0.062631	0.0460526	0.0584434	0.0730196	0.0535613	0.0656604	0.0526316	0.118041	0.0745585	0.457449	0.0661939	0.0517241	0.0567742	0.0679332	0.0463335	0.0736648	0.463542	0.442623	0.127907	0.0698925	0.0555556	0.0728155	0.0714286	0.111702	0.525253	0.0606061	0.0604396	0.131068
12	110719192	C	G	rs3026433	ATP2A2	single nucleotide variant	NM_001681.3(ATP2A2):c.-403C>G	Keratosis follicularis	PEL(1KG_phase3)	0.109539	0.51399	Benign	G	NA	NA	NA	NA	NA	NA	NA	NA	NA	NA	NA	NA	NA	NA	NA	NA	NA	0.0385691	0.264631	0.0909091	0.00193798	0.253988	0.216729	0.22147	0.0260417	0.114754	0.0755814	0.0107527	0.161616	0	0.0047619	0.351064	0	0.267677	0.21978	0.116505
1	209959168	C	T	rs1856161	IRF6	single nucleotide variant	NM_006147.3(IRF6):c.*2597G>A	Cleft Lip +/- Cleft Palate, Autosomal Dominant;Popliteal pterygium syndrome;Van der Woude syndrome	Nganasans(HuOrigin)	0.122377	0.513987	Benign	T	NA	NA	NA	NA	NA	NA	NA	NA	NA	NA	NA	NA	NA	NA	NA	NA	NA	0.00597701	0.205674	0.03125	0.416345	0.015544	0.0138763	0.0377532	0.00520833	0.00819672	0.19186	0.462366	0.030303	0.407767	0.438095	0.18617	0	0.010101	0.0164835	0.0776699
10	23478779	T	G	rs4748844	PTF1A	single nucleotide variant	NG_009798.1:g.2320T>G	Diabetes mellitus type 2	eas(gnomAD.genomes)	0.217404	0.513959	Benign	G	NA	NA	NA	NA	NA	NA	NA	NA	NA	NA	NA	NA	NA	NA	NA	NA	NA	0.0834483	0.20283	0.110345	0.731362	0.100115	0.0449533	0.0808824	0.0677083	0.0491803	0.104651	0.731183	0.0757576	0.728155	0.67619	0.101064	0.10101	0.0858586	0.043956	0.0728155
16	30914395	C	T	rs1870292	CTF1	single nucleotide variant	NM_001330.3(CTF1):c.*535C>T	Dilated Cardiomyopathy, Dominant	Mandenka(HuOrigin)	0.074362	0.513873	Likely_benign	T	NA	NA	NA	NA	NA	NA	NA	NA	NA	NA	NA	NA	NA	NA	NA	NA	NA	0.307056	0.0235849	0.00689655	0	0.000863061	0.00518471	0.0211397	0.369792	0.319672	0	0	0	0	0	0.0319149	0.338384	0	0.010989	0
6	51913240	G	A	rs10948667	PKHD1	single nucleotide variant	NM_138694.3(PKHD1):c.2407+50C>T	not specified	Pima(HuOrigin)	0.379248	0.513609	Benign	A	0.483471	0.520584	0.493302	0.516309	0.151593	0.651469	0.496626	0.381543	0.380126	0.361842	0.382125	0.479889	0.517569	0.506372	0.526332	0.336611	0.510926	0.156466	0.59434	0.489655	0.383871	0.486175	0.527117	0.525783	0.130208	0.163934	0.302326	0.403226	0.459596	0.407767	0.461905	0.553191	0.106061	0.515152	0.549451	0.339806
8	74893821	A	G	rs1053079	TMEM70	single nucleotide variant	NM_017866.5(TMEM70):c.748A>G (p.Thr250Ala)	Mitochondrial Complex V (ATP Synthase) Deficiency, Nuclear Type;not provided;not specified	Papuan(HGDP)	0.221723	0.513571	Benign	G	0.195652	0.145915	0.21259	0.159085	0.371178	0.36118	0.313937	0.11329	0.0945521	0.175676	0.117618	0.139925	0.15231	0.192685	0.123792	0.214085	0.219828	0.373419	0.34316	0.32069	0.130295	0.14183	0.150305	0.197974	0.333333	0.368852	0.186047	0.177419	0.141414	0.126214	0.161905	0.361702	0.424242	0.106061	0.137363	0.150485
8	133975283	G	A	rs2069561	TG	single nucleotide variant	NM_003235.4(TG):c.5512G>A (p.Asp1838Asn)	Thyroid dyshormonogenesis;not specified	Karitiana(HGDP)	0.415054	0.513517	Likely_benign	A	0.512397	0.516524	0.470317	0.510832	0.09375	0.632439	0.487786	0.353648	0.373232	0.361842	0.348378	0.575672	0.516351	0.488756	0.545695	0.505291	0.508004	0.106782	0.613475	0.493103	0.361647	0.584005	0.519251	0.516667	0.0520833	0.180328	0.488372	0.306452	0.469697	0.368932	0.385714	0.462766	0	0.631313	0.5	0.407767
1	116184621	C	A	rs191609592	VANGL1	single nucleotide variant	NM_138959.2(VANGL1):c.-224C>A	Caudal dysgenesis syndrome;Neural tube defect	BTQ(AAGC)	0.194978	0.513355	Likely_benign	A	NA	NA	NA	NA	NA	NA	NA	NA	NA	NA	NA	NA	NA	NA	NA	NA	NA	0.0718861	0.196379	0.110294	0.223958	0.155185	0.109846	0.138776	0.0572917	0.0655738	0.377907	0.306452	0.111111	0.271845	0.228571	0.154255	0.0808081	0.126263	0.104396	0.5
5	150632676	A	G	rs2277028	GM2A	single nucleotide variant	NM_000405.4(GM2A):c.-102A>G	Tay-Sachs disease, variant AB	Papuan(HGDP)	0.398678	0.513087	Benign	G	NA	NA	NA	NA	NA	NA	NA	NA	NA	NA	NA	NA	NA	NA	NA	NA	NA	0.406985	0.490544	0.42069	0.457847	0.304611	0.31276	0.347145	0.447917	0.401639	0.383721	0.435484	0.348485	0.432039	0.390476	0.457447	0.449495	0.353535	0.313187	0.339806
4	186071068	G	A	rs7675110	SLC25A4	single nucleotide variant	NM_001151.3(SLC25A4):c.*2943G>A	Progressive External Ophthalmoplegia with Mitochondrial DNA Deletions	Eskimo(HuOrigin)	0.464231	0.513042	Benign	A	NA	NA	NA	NA	NA	NA	NA	NA	NA	NA	NA	NA	NA	NA	NA	NA	NA	0.212233	0.560427	0.475862	0.685806	0.545769	0.511687	0.501842	0.25	0.196721	0.418605	0.612903	0.469697	0.728155	0.704762	0.537234	0.121212	0.464646	0.516484	0.436893
12	102793633	A	G	rs6218	IGF1	single nucleotide variant	NM_000618.4(IGF1):c.*2652T>C	Insulin-like growth factor I deficiency	BTQ(AAGC)	0.112319	0.512681	Benign	G	NA	NA	NA	NA	NA	NA	NA	NA	NA	NA	NA	NA	NA	NA	NA	NA	NA	0.00309846	0.0978774	0	0.278846	0.0754174	0.0112826	0.0422794	0	0	0.0930233	0.33871	0	0.26699	0.257143	0.0585106	0	0.0505051	0	0.0291262
14	65271650	A	G	rs229581	SPTB	single nucleotide variant	NM_001355436.2(SPTB):c.300+7T>C	Elliptocytosis;Spherocytosis, Dominant;not specified	Taa_West(HuOrigin)	0.424936	0.512564	Likely_benign	G	0.309917	0.318844	0.378242	0.331206	0.645513	0.26855	0.386075	0.324611	0.3033	0.315789	0.33035	0.314229	0.324249	0.378186	0.295439	0.481217	0.35882	0.638684	0.288416	0.386207	0.347044	0.31826	0.317614	0.342251	0.65625	0.663934	0.47093	0.360215	0.343434	0.34466	0.357143	0.292553	0.762626	0.308081	0.263736	0.5
9	35658062	G	T	rs3829076	RMRP	single nucleotide variant	NR_003051.3(RMRP):n.-47C>A	not specified	eas_jpn(gnomAD.exomes)	0.487687	0.512313	Benign	T	0.48913	0.451062	0.409091	0.442229	0.503584	0.444503	0.407635	0.516485	0.503829	1	0.519938	0.439481	0.448562	0.559524	0.45933	0.470021	0.471749	0.507029	0.451651	0.376761	0.47914	0.440415	0.432249	0.448052	0.479167	0.45082	0.563953	0.526882	0.444444	0.529126	0.52381	0.446809	0.494949	0.474747	0.461538	0.378641
3	197401952	T	C	rs28562770	RUBCN	single nucleotide variant	NM_001145642.4(RUBCN):c.2721A>G (p.Ser907=)	not specified	YRI(1KG_phase3)	0.18227	0.512175	Likely_benign	C	0.0913462	0.103496	0.115631	0.0961371	0.577842	0.0746139	0.0996781	0.0399933	0.0547407	0.0689655	0.0357143	0.064192	0.10049	0.0878274	0.0957185	0.121407	0.102337	0.580485	0.0884434	0.084507	0.0359435	0.0579251	0.0987614	0.102399	0.651042	0.54918	0.162791	0.0215054	0.131313	0.0533981	0.0190476	0.0904255	0.691919	0.0606061	0.115385	0.116505
9	137642577	T	C	rs12686426	COL5A1	single nucleotide variant	NM_000093.4(COL5A1):c.1570-59T>C	not specified	MbutiPygmy(HGDP)	0.218617	0.512152	Benign	C	NA	NA	NA	NA	NA	NA	NA	NA	NA	NA	NA	NA	NA	NA	NA	NA	NA	0.196966	0.162736	0.172414	0.349421	0.224971	0.236982	0.232537	0.161458	0.147541	0.156977	0.365591	0.257576	0.281553	0.385714	0.191489	0.186869	0.186869	0.214286	0.145631
10	101611294	G	A	rs8187710	ABCC2	single nucleotide variant	NM_000392.5(ABCC2):c.4544G>A (p.Cys1515Tyr)	Dubin-Johnson syndrome	MbutiPygmy(HGDP)	0.065002	0.511921	Likely_benign	A	0.0247934	0.0569884	0.0934783	0.0620561	0.157254	0.0414258	0.12949	0.000706752	0.000261917	0	0.000831947	0.0225446	0.0571944	0.0783358	0.0339405	0.0183564	0.0658409	0.158741	0.0579196	0.117241	0.00128205	0.0233161	0.0511275	0.0450368	0.151042	0.139344	0.0174419	0	0.0656566	0	0	0.0425532	0.0959596	0.020202	0.043956	0.0145631
16	1616201	C	T	rs11648609	IFT140	single nucleotide variant	NM_014714.3(IFT140):c.1862G>A (p.Arg621Gln)	Renal dysplasia, retinal pigmentary dystrophy, cerebellar ataxia and skeletal dysplasia;not specified	Pima(HGDP)	0.059539	0.51189	Benign	T	0.0371901	0.0485835	0.0498174	0.0477865	0.0161171	0.325756	0.065377	0.14104	0.123101	0.0855263	0.146374	0.0202846	0.0491315	0.0565543	0.050662	0.0276018	0.0761082	0.0189524	0.260613	0.0689655	0.139281	0.015841	0.0466684	0.0368324	0.015625	0.0245902	0.0290698	0.166667	0.030303	0.15534	0.128571	0.101064	0.0151515	0.0252525	0.0659341	0.0533981
2	113973632	G	A	rs2019137	PAX8	single nucleotide variant	NM_003466.3(PAX8):c.*2478C>T	Congenital hypothyroidism	Nganasans(HuOrigin)	0.488135	0.511865	Likely_benign	A	NA	NA	NA	NA	NA	NA	NA	NA	NA	NA	NA	NA	NA	NA	NA	NA	NA	0.244994	0.542553	0.545139	0.656371	0.392569	0.464421	0.428967	0.291667	0.319672	0.476744	0.693548	0.444444	0.631068	0.638095	0.489362	0.222222	0.419192	0.527473	0.398058
8	144992862	A	G	rs7819099	PLEC	single nucleotide variant	NM_000445.4(PLEC):c.11208T>C (p.Ala3736=)	not specified	Yoruba(HGDP)	0.369138	0.511814	Benign	G	0.333333	0.434814	0.462325	0.425823	0.737703	0.281116	0.477072	0.149121	0.156627	0.150794	0.147046	0.404744	0.42635	0.460757	0.395755	0.367461	0.420947	0.728835	0.358156	0.454861	0.143135	0.395101	0.409898	0.413889	0.755208	0.762295	0.377907	0.150538	0.434343	0.150485	0.166667	0.441489	0.863636	0.388889	0.423077	0.364078
16	2160503	T	G	rs71385734	PKD1	single nucleotide variant	NM_001009944.2(PKD1):c.4665A>C (p.Ala1555=)	not specified	GWD(1KG_phase3)	0.165553	0.511438	Benign	G	0.15625	0.168708	0.199542	0.169411	0.501502	0.111671	0.233006	0.00016406	0.000262055	0	0.000139567	0.185816	0.167386	0.177346	0.147976	0.08767	0.178466	0.496083	0.121462	0.232639	0.00192555	0.18098	0.155296	0.171271	0.53125	0.42623	0.0348837	0	0.166667	0	0	0.244681	0.510101	0.186869	0.137363	0.092233
2	182468818	A	T	rs6433923	CERKL	single nucleotide variant	NM_001030311.2(CERKL):c.239-12T>A	Retinitis Pigmentosa, Recessive;Retinitis pigmentosa 26;not specified	MSL(1KG_phase3)	0.212111	0.511418	Likely_benign	T	0.0720339	0.0795025	0.0872825	0.0808644	0.577876	0.188848	0.078942	0.123287	0.104775	0.153333	0.127643	0.114793	0.0810359	0.0735518	0.0820009	0.120782	0.12398	0.578674	0.17654	0.0758621	0.127086	0.119804	0.0817981	0.127993	0.713542	0.581967	0.116279	0.0967742	0.0959596	0.126214	0.0809524	0.287234	0.712121	0.0808081	0.0824176	0.140777
17	73830270	G	A	rs7212635	UNC13D	single nucleotide variant	NM_199242.2(UNC13D):c.2299-46C>T	not specified	BantuKenya(HGDP)	0.21619	0.511083	Benign	A	0.0657895	0.0592083	0.0985321	0.0722237	0.437508	0.0805025	0.125279	0.34035	0.397838	0.386667	0.32462	0.0523674	0.0679574	0.0989541	0.0607648	0.147758	0.106725	0.426203	0.100236	0.1	0.330323	0.0544041	0.0677955	0.0939227	0.427083	0.434426	0.139535	0.252688	0.0909091	0.407767	0.385714	0.164894	0.484848	0.020202	0.0604396	0.121359
7	103053435	A	G	rs7779997	SLC26A5	single nucleotide variant	NM_001167962.1(SLC26A5):c.403+14T>C	Nonsyndromic Hearing Loss, Recessive;not specified	MSL(1KG_phase3)	0.388918	0.511082	Likely_benign	G	0.270833	0.227565	0.189087	0.220623	0.738691	0.32119	0.167628	0.410455	0.408395	0.375	0.411372	0.30563	0.225154	0.193548	0.245274	0.346159	0.252372	0.721685	0.303066	0.193103	0.424968	0.308468	0.228282	0.293738	0.760417	0.729508	0.354651	0.376344	0.267677	0.38835	0.438095	0.239362	0.823232	0.308081	0.230769	0.368932
8	100791156	T	C	rs7833870	VPS13B	single nucleotide variant	NM_017890.4(VPS13B):c.7751T>C (p.Val2584Ala)	Cohen syndrome;Neurodevelopmental;not specified	MbutiPygmy(HGDP)	0.065931	0.510992	Likely_benign	C	0.025	0.0435445	0.0239798	0.0388129	0.205734	0.0592798	0.0174881	0.0532054	0.0360743	0.00657895	0.058175	0.0453369	0.0390323	0.0322581	0.0394686	0.0222462	0.0421431	0.206964	0.0507075	0.0103448	0.0566281	0.0408751	0.0387109	0.0459559	0.307292	0.180328	0.0232558	0.0483871	0.040404	0.0825243	0.0571429	0.0957447	0.171717	0.0353535	0.0714286	0.00970874
17	78184393	C	T	rs7503034	SGSH	single nucleotide variant	NM_000199.3(SGSH):c.1367G>A (p.Arg456His)	Mucopolysaccharidosis, MPS-III-A;Sanfilippo syndrome;not provided;not specified	Karitiana(HGDP)	0.346156	0.510987	Benign	T	0.300847	0.331667	0.33555	0.331799	0.213571	0.538314	0.353171	0.421571	0.341387	0.263889	0.44446	0.35161	0.327344	0.339601	0.310499	0.398049	0.355051	0.213956	0.503538	0.341379	0.439767	0.342363	0.327043	0.349631	0.1875	0.204918	0.436047	0.510753	0.29798	0.383495	0.409524	0.446809	0.186869	0.323232	0.274725	0.42233
5	131676320	C	T	rs1050152	SLC22A4	single nucleotide variant	NM_003059.2(SLC22A4):c.1507C>T (p.Leu503Phe)	SLC22A4 POLYMORPHISM	Sardinian(HGDP)	0.185513	0.510916	Benign	T	0.347107	0.44311	0.431328	0.417269	0.0722195	0.215165	0.41498	0.00119721	0.00131579	0	0.00117859	0.311541	0.426717	0.400375	0.412834	0.120101	0.344137	0.072627	0.270047	0.396552	0.000643501	0.302995	0.390349	0.319188	0.0520833	0.106557	0.110465	0	0.393939	0	0	0.25	0	0.313131	0.412088	0.0873786
11	76853783	T	C	rs1052030	MYO7A	single nucleotide variant	NM_000260.3(MYO7A):c.47T>C (p.Leu16Ser)	Nonsyndromic Hearing Loss, Dominant;Nonsyndromic Hearing Loss, Recessive;Retinitis pigmentosa-deafness syndrome;Usher syndrome, type 1;not provided;not specified	MbutiPygmy(HGDP)	0.450742	0.510797	Benign	C	0.323529	0.342079	0.395923	0.344131	0.773349	0.370189	0.382957	0.499317	0.520032	0.419355	0.49429	0.293595	0.345133	0.355873	0.328589	0.416882	0.395376	0.76831	0.378251	0.381944	0.507079	0.289337	0.329949	0.364391	0.776042	0.680328	0.447674	0.494624	0.30303	0.514563	0.419048	0.404255	0.858586	0.232323	0.351648	0.456311
14	23892888	A	G	rs7157716	MYH7	single nucleotide variant	NM_000257.3(MYH7):c.2967T>C (p.Ile989=)	Cardiovascular phenotype;Dilated Cardiomyopathy, Dominant;Hypertrophic cardiomyopathy;Left ventricular noncompaction cardiomyopathy;Myopathy, distal, 1;Myosin storage myopathy;Scapuloperoneal myopathy;not specified	ESN(1KG_phase3)	0.317612	0.510671	Benign	G	0.326446	0.319319	0.353095	0.327731	0.715367	0.202359	0.395635	0.156627	0.158722	0.144737	0.156198	0.247506	0.323028	0.345952	0.307837	0.257676	0.323779	0.718772	0.252955	0.427083	0.138639	0.259781	0.326047	0.331793	0.71875	0.655738	0.156977	0.129032	0.267677	0.179612	0.17619	0.297872	0.828283	0.292929	0.307692	0.31068
15	100594271	G	A	rs28529328	ADAMTS17	single nucleotide variant	NM_139057.3(ADAMTS17):c.2138-12C>T	Weill-Marchesani-like syndrome	Papuan(HuOrigin)	0.310785	0.510644	Benign	A	0.210744	0.211644	0.222522	0.208621	0.303055	0.374508	0.27381	0.437514	0.465951	0.5	0.429334	0.243414	0.213223	0.214768	0.216997	0.280268	0.258143	0.293751	0.329009	0.241379	0.428295	0.237615	0.208582	0.230203	0.338542	0.286885	0.348837	0.403226	0.20202	0.417476	0.442857	0.239362	0.373737	0.252525	0.142857	0.223301
11	111908162	T	C	rs627441	DLAT	single nucleotide variant	NM_001931.4(DLAT):c.953T>C (p.Val318Ala)	Pyruvate dehydrogenase complex deficiency;not provided;not specified	BiakaPygmy(HGDP);MbutiPygmy(HGDP)	0.489609	0.510391	Benign	C	0.408333	0.375575	0.343843	0.36978	0.787509	0.445817	0.307188	0.593328	0.57914	0.605263	0.59696	0.438257	0.368201	0.33633	0.368021	0.415496	0.384866	0.786536	0.440898	0.313793	0.58816	0.430876	0.382085	0.40463	0.786458	0.737705	0.436047	0.586022	0.267677	0.601942	0.57619	0.329787	0.818182	0.363636	0.379121	0.368932
1	116184619	G	C	rs116216703	VANGL1	single nucleotide variant	NM_138959.2(VANGL1):c.-226G>C	Caudal dysgenesis syndrome;Neural tube defect	BTQ(AAGC)	0.198059	0.510274	Likely_benign	C	NA	NA	NA	NA	NA	NA	NA	NA	NA	NA	NA	NA	NA	NA	NA	NA	NA	0.071835	0.196379	0.110294	0.223958	0.155429	0.109714	0.138493	0.0572917	0.0655738	0.377907	0.306452	0.111111	0.271845	0.228571	0.154255	0.0808081	0.126263	0.104396	0.5
7	5568366	A	G	rs852423	ACTB	single nucleotide variant	NM_001101.4(ACTB):c.364-16T>C	not specified	MbutiPygmy(HGDP)	0.452269	0.509269	Benign	G	0.34188	0.414828	0.434544	0.425906	0.755344	0.393583	0.531767	0.305513	0.250393	0.263158	0.320589	0.447059	0.421132	0.435765	0.419053	0.407324	0.430118	0.749252	0.411557	0.555172	0.310233	0.435558	0.415204	0.441068	0.802083	0.778689	0.377907	0.387097	0.328283	0.257282	0.238095	0.398936	0.792929	0.368687	0.340659	0.38835
15	40915045	T	G	rs8041534	KNL1	single nucleotide variant	NM_170589.4(KNL1):c.2661T>G (p.Thr887=)	Primary Microcephaly, Recessive;not specified	Kalash(HuOrigin)	0.379763	0.509126	Benign	G	0.533333	0.392852	0.401654	0.413313	0.366731	0.257175	0.41645	0.238528	0.231132	0.318182	0.239792	0.460374	0.407275	0.452759	0.419965	0.484631	0.396339	0.375029	0.277778	0.368056	0.223008	0.462579	0.437354	0.422652	0.328125	0.311475	0.412791	0.290323	0.378788	0.23301	0.22381	0.367021	0.338384	0.464646	0.423077	0.393204
1	6508872	C	T	rs138198721	ESPN	single nucleotide variant	NM_031475.2(ESPN):c.1636C>T (p.Arg546Cys)	not specified	LWK(1KG_phase3)	0.213208	0.509014	Benign	T	0.5	0.150552	0.447368	0.196078	0.711538	0.25	0.352941	NA	NA	NA	NA	0.189189	0.173713	0	0.142857	0.214286	0.235294	0.555634	0.103352	0.0827338	0.0096401	0.0480287	0.0663142	0.0871743	0.588542	0.557377	0.0755814	0.016129	0.0555556	0.0339806	0.00952381	0.111702	0.676768	0.040404	0.043956	0.126214
7	147674978	A	G	rs10240503	CNTNAP2	single nucleotide variant	NM_014141.5(CNTNAP2):c.2280A>G (p.Ser760=)	Neurodevelopmental;Pitt-Hopkins-like syndrome;Pitt-Hopkins-like syndrome 1;not specified	MbutiPygmy(HGDP)	0.183303	0.509004	Benign	G	0.14876	0.107524	0.10233	0.109103	0.492434	0.0857424	0.115102	0.19132	0.167891	0.230263	0.197102	0.0889094	0.106522	0.111236	0.102817	0.176607	0.12557	0.484224	0.0919811	0.113793	0.19112	0.101036	0.106263	0.127993	0.505208	0.491803	0.174419	0.16129	0.146465	0.18932	0.214286	0.111702	0.560606	0.0909091	0.137363	0.174757
2	203421199	G	A	rs1061157	BMPR2	single nucleotide variant	NM_001204.6(BMPR2):c.2811G>A (p.Arg937=)	Primary pulmonary hypertension;not specified	BTQ(AAGC)	0.116033	0.508967	Benign	A	0.116667	0.12164	0.119819	0.115218	0.0203252	0.0829141	0.0750596	0.1051	0.0597171	0.0526316	0.117667	0.122252	0.117299	0.120599	0.111328	0.239727	0.114081	0.0216942	0.0978774	0.0655172	0.0955128	0.122267	0.122356	0.0976059	0.00520833	0.0409836	0.215116	0.182796	0.126263	0.0631068	0.0952381	0.138298	0	0.151515	0.153846	0.218447
6	43584152	A	G	rs9472090	POLH	single nucleotide variant	NM_006502.2(POLH):c.*1858A>G	Xeroderma pigmentosum	ESN(1KG_phase3)	0.1578	0.508866	Benign	G	NA	NA	NA	NA	NA	NA	NA	NA	NA	NA	NA	NA	NA	NA	NA	NA	NA	0.516522	0.0560859	0.0659722	0.0367268	0.0380435	0.0637588	0.0877358	0.541667	0.516393	0.122093	0.0215054	0.0656566	0.0533981	0.0428571	0.0744681	0.666667	0.0454545	0.0824176	0.121359
19	36582270	G	A	rs2301736	WDR62	single nucleotide variant	NM_001083961.1(WDR62):c.2147-34G>A	not specified	Karitiana(HuOrigin)	0.40787	0.508796	Likely_benign	A	0.5	0.457706	0.409282	0.446941	0.289198	0.570861	0.376416	0.554956	0.562369	0.625	0.552247	0.488706	0.450175	0.427607	0.461603	0.285873	0.429225	0.290754	0.524823	0.34375	0.570232	0.48415	0.462676	0.463031	0.3125	0.278689	0.296512	0.526882	0.449495	0.592233	0.595238	0.505319	0.272727	0.505051	0.521978	0.300971
17	28576076	T	C	rs1050565	BLMH	single nucleotide variant	NM_000386.3(BLMH):c.1327A>G (p.Ile443Val)	BLEOMYCIN HYDROLASE POLYMORPHISM	Karitiana(HuOrigin)	0.282917	0.508749	Benign	C	0.338843	0.333151	0.286934	0.329832	0.212395	0.350995	0.239178	0.171017	0.169025	0.18	0.17145	0.345143	0.330007	0.302099	0.346849	0.265238	0.311767	0.212428	0.3487	0.258621	0.159383	0.354718	0.332466	0.324399	0.15625	0.196721	0.22093	0.198925	0.323232	0.131068	0.2	0.361702	0.166667	0.383838	0.368132	0.218447
20	9401940	A	G	rs6056609	PLCB4	single nucleotide variant	NM_000933.3(PLCB4):c.2119-4A>G	Auriculocondylar syndrome	Taa_West(HuOrigin)	0.147605	0.508645	Benign	G	0.0123967	0.0335186	0.0433105	0.0331598	0.163419	0.125736	0.0504798	0.232497	0.210499	0.153333	0.239152	0.0233948	0.0322749	0.0333583	0.0244921	0.0614347	0.0669951	0.163603	0.113475	0.037931	0.261568	0.0244534	0.0315824	0.0359116	0.125	0.147541	0.116279	0.301075	0.0353535	0.242718	0.247619	0.18617	0.141414	0.020202	0.0549451	0.0436893
15	45670681	A	C	rs8024550	GATM	single nucleotide variant	NM_001482.2(GATM):c.-30T>G	Arginine:glycine amidinotransferase deficiency;not specified	YRI(1KG_phase3)	0.079434	0.508529	Benign	C	0	0.000416435	0	0	0.37172	0.0133075	0	0.00297265	0	0	0.0041806	0	0.00024562	0	0	0.0389418	0.0121457	0.413825	0.0203349	0	0	0	0.00143416	0.0220588	0.453125	0.467213	0.0697674	0.016129	0	0	0	0.0531915	0.580808	0	0	0.0679612
14	65542607	C	T	rs1957949	MAX	single nucleotide variant	NM_002382.4(MAX):c.*587G>A	Pheochromocytoma	Hadza(HuOrigin)	0.491536	0.508464	Benign	T	NA	NA	NA	NA	NA	NA	NA	NA	NA	NA	NA	NA	NA	NA	NA	NA	NA	0.834379	0.271429	0.389655	0.384367	0.448346	0.390097	0.437616	0.890625	0.844262	0.569767	0.397849	0.39899	0.368932	0.357143	0.335106	0.954545	0.363636	0.401099	0.398058
2	172291616	C	T	rs6751956	DCAF17	single nucleotide variant	NM_025000.3(DCAF17):c.150C>T (p.Val50=)	Hypogonadism, diabetes mellitus, alopecia, mental retardation and electrocardiographic abnormalities;not specified	Chukchis(HuOrigin)	0.317648	0.508439	Benign	T	0.266667	0.228004	0.221393	0.22848	0.383204	0.397153	0.282479	0.241458	0.289157	0.343284	0.227493	0.231419	0.227629	0.234234	0.227708	0.313795	0.254785	0.383641	0.376179	0.255172	0.223008	0.229683	0.226558	0.234807	0.369792	0.303279	0.302326	0.236559	0.247475	0.26699	0.233333	0.292553	0.378788	0.267677	0.159341	0.276699
9	107599390	G	A	rs2297399	ABCA1	single nucleotide variant	NM_005502.3(ABCA1):c.1195-13C>T	Familial High Density Lipoprotein Deficiency;Tangier disease	Onge(HuOrigin)	0.127996	0.508368	Benign	A	0.0333333	0.0651678	0.0632294	0.0623703	0.0182401	0.0608245	0.0660509	0.431478	0.396281	0.366667	0.441512	0.0616823	0.0630035	0.056391	0.0611064	0.0976399	0.0785083	0.0215935	0.0648585	0.0689655	0.436693	0.0608069	0.0566221	0.0608856	0.03125	0.0163934	0.0930233	0.413978	0.0858586	0.417476	0.42381	0.0744681	0.010101	0.030303	0.043956	0.092233
17	61559923	C	T	rs4309	ACE	single nucleotide variant	NM_000789.3(ACE):c.1215C>T (p.Pro405=)	Renal dysplasia;not specified	Karitiana(HGDP)	0.456101	0.508184	Benign	T	0.495868	0.434977	0.367107	0.426708	0.152431	0.5979	0.352036	0.651261	0.578575	0.546053	0.671613	0.383712	0.428715	0.406461	0.449744	0.538678	0.439231	0.166207	0.570755	0.324138	0.674807	0.383728	0.438877	0.408088	0.130208	0.213115	0.587209	0.629032	0.414141	0.73301	0.7	0.484043	0.10101	0.373737	0.412088	0.514563
15	40914772	C	T	rs11855334	KNL1	single nucleotide variant	NM_170589.4(KNL1):c.2388C>T (p.Val796=)	Primary Microcephaly, Recessive;not specified	Kalash(HuOrigin)	0.380751	0.508138	Benign	T	0.529412	0.393561	0.40166	0.413517	0.364384	0.25859	0.418565	0.238679	0.231335	0.315385	0.239963	0.461273	0.40749	0.45222	0.4196	0.484819	0.397963	0.373678	0.280142	0.375	0.22365	0.462601	0.437955	0.420664	0.328125	0.311475	0.412791	0.290323	0.378788	0.23301	0.22381	0.367021	0.338384	0.464646	0.423077	0.38835
14	94844470	C	A	rs1243164	SERPINA1	single nucleotide variant	NM_000295.4(SERPINA1):c.*316G>T	Alpha-1-antitrypsin deficiency	MbutiPygmy(HGDP)	0.184275	0.508032	Likely_benign	A	NA	NA	NA	NA	NA	NA	NA	NA	NA	NA	NA	NA	NA	NA	NA	NA	NA	0.565091	0.11639	0.265517	0.0250643	0.291402	0.213392	0.227941	0.515625	0.54918	0.0872093	0.0376344	0.232323	0.0242718	0.0333333	0.148936	0.671717	0.272727	0.203297	0.169903
1	116238504	C	T	rs17034228	CASQ2;VANGL1	single nucleotide variant	NM_138959.2(VANGL1):c.*4504C>T	Catecholaminergic polymorphic ventricular tachycardia;Caudal dysgenesis syndrome;Neural tube defect	Karitiana(HuOrigin)	0.158856	0.507811	Likely_benign	T	NA	NA	NA	NA	NA	NA	NA	NA	NA	NA	NA	NA	NA	NA	NA	NA	NA	0.232788	0.167453	0.175862	0.121154	0.182316	0.126865	0.157459	0.244792	0.278689	0.145349	0.0860215	0.141414	0.135922	0.119048	0.143617	0.277778	0.191919	0.131868	0.174757
6	116441646	C	G	rs2228547	COL10A1	single nucleotide variant	NM_000493.3(COL10A1):c.1633G>C (p.Gly545Arg)	Metaphyseal chondrodysplasia;not specified	BTQ(AAGC)	0.20062	0.507713	Benign	G	0.165289	0.114574	0.0938044	0.116957	0.269112	0.0785243	0.100734	0.201392	0.249607	0.293333	0.187673	0.15037	0.120022	0.108989	0.144683	0.216586	0.120268	0.260584	0.0766509	0.124138	0.172657	0.142405	0.12805	0.145488	0.286458	0.270492	0.255814	0.258065	0.111111	0.203883	0.22381	0.12766	0.313131	0.146465	0.181319	0.252427
11	17417504	A	G	rs739689	ABCC8	single nucleotide variant	NM_000352.4(ABCC8):c.4120-27T>C	not specified	YRI(HapMap)	0.366852	0.507532	Likely_benign	G	0.3	0.335058	0.452497	0.361008	0.749281	0.431185	0.403482	0.088755	0.145695	0.0957447	0.0743595	0.207187	0.351952	0.386029	0.3896	0.367257	0.371676	0.731132	0.395981	0.417241	0.0688546	0.21042	0.319428	0.314338	0.755208	0.688525	0.331395	0.0376344	0.348485	0.092233	0.104762	0.5	0.828283	0.212121	0.357143	0.368932
11	825110	A	G	rs1138714	PNPLA2	single nucleotide variant	NM_020376.3(PNPLA2):c.*248A>G	Neutral lipid storage disease with myopathy	Karitiana(HGDP)	0.421048	0.507523	Benign	G	NA	NA	NA	NA	NA	NA	NA	NA	NA	NA	NA	NA	NA	NA	NA	NA	NA	0.261379	0.659574	0.444828	0.260336	0.631503	0.577542	0.563771	0.317708	0.336066	0.168605	0.134409	0.555556	0.242718	0.285714	0.62234	0.207071	0.681818	0.615385	0.160194
3	121712805	G	C	rs3915061	ILDR1	single nucleotide variant	NM_001199799.1(ILDR1):c.791C>G (p.Pro264Arg)	not specified	BTQ(AAGC)	0.325878	0.507456	Benign	C	0.330435	0.252075	0.277408	0.270708	0.408108	0.339484	0.311096	0.204798	0.181247	0.18	0.211314	0.312975	0.260738	0.287356	0.251803	0.485552	0.30715	0.401473	0.319149	0.310345	0.228443	0.311853	0.272005	0.285846	0.4375	0.295082	0.47093	0.252688	0.308081	0.18932	0.171429	0.297872	0.388889	0.282828	0.247253	0.490291
11	68133035	T	C	rs314776	LRP5	single nucleotide variant	NM_002335.3(LRP5):c.884-4T>C	not provided;not specified	MSL(1KG_phase3)	0.339841	0.507218	Benign	C	0.370833	0.414396	0.444279	0.407457	0.699002	0.535171	0.381921	0.106102	0.0578837	0.0789474	0.119157	0.269501	0.403947	0.393233	0.366876	0.17063	0.399609	0.694111	0.540284	0.451389	0.114341	0.265994	0.388701	0.35386	0.744792	0.688525	0.162791	0.150538	0.378788	0.0970874	0.138095	0.510638	0.686869	0.30303	0.412088	0.184466
17	41257134	T	C	rs799912	BRCA1	single nucleotide variant	NM_007294.3(BRCA1):c.213-161A>G	Breast-ovarian cancer, familial 1;not specified	BiakaPygmy(HuOrigin);Damara(HuOrigin);Xuun(HuOrigin)	0.493154	0.506846	Benign	C	NA	NA	NA	NA	NA	NA	NA	NA	NA	NA	NA	NA	NA	NA	NA	NA	NA	0.825328	0.344787	0.327586	0.366925	0.395509	0.349091	0.418199	0.848958	0.745902	0.523256	0.5	0.363636	0.349515	0.37619	0.521277	0.949495	0.358586	0.324176	0.509709
3	70016467	C	T	rs576	MITF	single nucleotide variant	NM_000248.3(MITF):c.*2068C>T	Tietz syndrome;Waardenburg syndrome	Papuan(HuOrigin)	0.350341	0.506802	Benign	T	NA	NA	NA	NA	NA	NA	NA	NA	NA	NA	NA	NA	NA	NA	NA	NA	NA	0.451766	0.335697	0.296552	0.267097	0.276498	0.29531	0.313653	0.489583	0.42623	0.343023	0.27957	0.282828	0.330097	0.285714	0.382979	0.388889	0.267677	0.258242	0.34466
1	40759064	C	T	rs10489431	ZMPSTE24	single nucleotide variant	NM_005857.4(ZMPSTE24):c.*723C>T	Lethal tight skin contracture syndrome;Mandibuloacral dysplasia;not provided	Onge(HuOrigin)	0.129832	0.506531	Likely_benign	T	NA	NA	NA	NA	NA	NA	NA	NA	NA	NA	NA	NA	NA	NA	NA	NA	NA	0.0616026	0.126777	0.117241	0.237789	0.0587882	0.0666054	0.085206	0.0520833	0.0983607	0.25	0.188172	0.0808081	0.257282	0.190476	0.0638298	0.040404	0.040404	0.032967	0.208738
14	24550224	C	T	rs3561	NRL	single nucleotide variant	NM_006177.3(NRL):c.*221G>A	Retinitis Pigmentosa, Dominant	Papuan(HGDP)	0.46424	0.506349	Likely_benign	T	NA	NA	NA	NA	NA	NA	NA	NA	NA	NA	NA	NA	NA	NA	NA	NA	NA	0.179056	0.487028	0.618056	0.521879	0.633199	0.667449	0.601664	0.135417	0.229508	0.511628	0.516129	0.70202	0.461165	0.533333	0.547872	0.126263	0.636364	0.659341	0.427184
20	34025983	A	G	rs143383	GDF5	single nucleotide variant	NM_000557.4(GDF5):c.-275T>C	Acromesomelic Dysplasia;Brachydactyly;Chondrodysplasia;Fibular hypoplasia and complex brachydactyly;Osteoarthritis of hip;Symphalangism-brachydactyly syndrome	ESN(1KG_phase3);YRI(1KG_phase3)	0.493753	0.506247	Benign	G	NA	NA	NA	NA	NA	NA	NA	NA	NA	NA	NA	NA	NA	NA	NA	NA	NA	0.88238	0.279481	0.441379	0.285252	0.420219	0.38378	0.442272	0.9375	0.852459	0.563953	0.344086	0.29798	0.23301	0.27619	0.319149	1	0.40404	0.313187	0.650485
14	102446161	G	A	rs3818188	DYNC1H1	single nucleotide variant	NM_001376.4(DYNC1H1):c.624G>A (p.Pro208=)	Charcot-Marie-Tooth disease, type 2;Intellectual Disability, Dominant;Neurodevelopmental;Spinocerebellar Ataxia, Dominant;not specified	Karitiana(HGDP)	0.243855	0.506145	Likely_benign	A	0.22314	0.178981	0.189271	0.184618	0.0406254	0.361615	0.289683	0.454605	0.482713	0.539474	0.44627	0.19793	0.187863	0.181273	0.205779	0.136865	0.219902	0.0396096	0.329009	0.296552	0.460847	0.205815	0.19039	0.183824	0.0260417	0.0409836	0.215116	0.430108	0.136364	0.441748	0.4	0.324468	0.020202	0.156566	0.225275	0.116505
6	52358010	C	G	rs78956562	EFHC1	single nucleotide variant	NM_018100.3(EFHC1):c.*871C>G	Juvenile myoclonic epilepsy	eas_jpn(gnomAD.exomes)	0.194309	0.505691	Likely_benign	G	0.1	0.111848	0.109472	0.109414	0.0218534	0.124743	0.159046	0.438459	0.338865	0.7	0.459902	0.075065	0.110928	0.121951	0.107702	0.192414	0.125376	0.0222171	0.114558	0.137931	0.478571	0.0792861	0.106811	0.131041	0.0104167	0.00819672	0.22093	0.419355	0.0808081	0.509709	0.47619	0.132979	0	0.0606061	0.0989011	0.194175
1	231559226	A	G	rs12406290	EGLN1	single nucleotide variant	NM_022051.2(EGLN1):c.-1592T>C	Familial erythrocytosis	TBN(AAGC)	0.267042	0.505685	Benign	G	NA	NA	NA	NA	NA	NA	NA	NA	NA	NA	NA	NA	NA	NA	NA	NA	NA	0.212118	0.214623	0.168966	0.470437	0.141542	0.160093	0.183824	0.239583	0.221311	0.354651	0.494624	0.207071	0.509709	0.480952	0.202128	0.232323	0.181818	0.0934066	0.286408
8	41547748	G	A	rs7816734	ANK1	single nucleotide variant	NM_020476.2(ANK1):c.4101C>T (p.Ala1367=)	Spherocytosis, Dominant;not specified	MSL(1KG_phase3)	0.123902	0.50551	Likely_benign	A	0.0330579	0.0561982	0.0430585	0.054683	0.484362	0.041751	0.0635913	0.0723219	0.0814563	0.0986842	0.0696255	0.0312645	0.055929	0.0505997	0.06339	0.0434413	0.0624592	0.480433	0.0389151	0.0655172	0.0695876	0.0253165	0.0522185	0.0670956	0.484375	0.467213	0.0290698	0.0645161	0.0808081	0.0776699	0.0952381	0.0851064	0.520202	0.0454545	0.0604396	0.092233
16	2165630	T	C	rs35929659	PKD1	single nucleotide variant	NM_001009944.2(PKD1):c.1850-4A>G	not specified	GWD(1KG_phase3)	0.162709	0.505433	Benign	C	0.166667	0.176954	0.194967	0.173848	0.474427	0.113948	0.230057	0.000112473	0.000264271	0	7.17257e-05	0.160638	0.170035	0.16087	0.145015	0.0714189	0.17746	0.484585	0.129717	0.237931	0.0019305	0.182814	0.165991	0.172222	0.515625	0.42623	0.0639535	0.00537634	0.191919	0.00970874	0.00952381	0.255319	0.535354	0.186869	0.159341	0.0582524
16	31121793	G	A	rs14235	BCKDK	single nucleotide variant	NM_005881.3(BCKDK):c.615G>A (p.Thr205=)	not specified	CHB(1KG_phase3)	0.450972	0.505338	Likely_benign	A	0.316239	0.362377	0.427948	0.383063	0.117782	0.451358	0.484631	0.894654	0.925877	0.886667	0.886458	0.382927	0.381772	0.451394	0.384141	0.175484	0.400394	0.125489	0.431442	0.475862	0.89704	0.386521	0.358453	0.357934	0.0885417	0.196721	0.139535	0.822581	0.434343	0.956311	0.890476	0.382979	0.0656566	0.328283	0.340659	0.169903
8	30921935	G	A	rs2230009	WRN	single nucleotide variant	NM_000553.5(WRN):c.340G>A (p.Val114Ile)	Werner syndrome;not specified	Hadza(HuOrigin)	0.063125	0.505057	Likely_benign	A	0.0909091	0.0596282	0.039231	0.0613134	0.12826	0.0256722	0.0440564	0.0215831	0.022001	0.0328947	0.0213533	0.068228	0.0580272	0.0528486	0.0600413	0.0779984	0.0508806	0.129047	0.0365566	0.0451389	0.0205656	0.0736903	0.0625648	0.0709024	0.1875	0.106557	0.0930233	0.0322581	0.0808081	0.00970874	0.0238095	0.0212766	0.121212	0.0505051	0.0714286	0.0679612
11	61731977	G	A	rs17156609	BEST1;FTH1	single nucleotide variant	NM_002032.2(FTH1):c.*222C>T	Iron Overload;Retinitis Pigmentosa, Recessive;Vitelliform macular dystrophy type 2;Vitreoretinochoroidopathy	Gond(Indian_Genomes)	0.173548	0.505024	Benign	A	NA	NA	NA	NA	NA	NA	NA	NA	NA	NA	NA	NA	NA	NA	NA	NA	NA	0.00688863	0.100473	0.0275862	0.181877	0.062788	0.032141	0.0716912	0.00520833	0.0327869	0.412791	0.231183	0.0151515	0.165049	0.261905	0.0638298	0	0.0707071	0.0549451	0.378641
3	164697082	A	G	rs73018867	SI	single nucleotide variant	NM_001041.3(SI):c.*68T>C	Sucrase-isomaltase deficiency	ESN(1KG_phase3)	0.19724	0.504781	Likely_benign	G	NA	NA	NA	NA	NA	NA	NA	NA	NA	NA	NA	NA	NA	NA	NA	NA	NA	0.577678	0.0997596	0.117241	0.0608974	0.0627168	0.129068	0.153346	0.5625	0.516393	0.151163	0.0645161	0.111111	0.0679612	0.047619	0.138298	0.70202	0.0555556	0.126374	0.131068
16	28853996	A	C	rs3088215	TUFM	single nucleotide variant	NM_003321.4(TUFM):c.*300T>G	Combined oxidative phosphorylation deficiency	PEL(1KG_phase3)	0.271757	0.504713	Benign	C	NA	NA	NA	NA	NA	NA	NA	NA	NA	NA	NA	NA	NA	NA	NA	NA	NA	0.256788	0.454009	0.251724	0.108612	0.422523	0.399896	0.375461	0.317708	0.221311	0.180233	0.102151	0.363636	0.165049	0.128571	0.462766	0.181818	0.363636	0.346154	0.291262
[truncated: 14,923 more rows]
[truncated: 271 more columns]

## Sheet: Sheet2
rs	rsid	rs1611119
rs	1611119	rs1024196
rs	1024196	rs2144407
rs	2144407	rs2294976
rs	2294976	rs1871534
rs	1871534	rs8142033
rs	8142033	rs10138997
rs	10138997	rs827237
[truncated: 15,724 more rows]
