# Supplementary material for: PGG.SNV: understanding the evolutionary and medical implications of human single nucleotide variations in diverse populations
Source: Genome Biol. 2019 Oct 22;20:215. doi: 10.1186/s13059-019-1838-5 (PMC6805450; doi:10.1186/s13059-019-1838-5)
Supplement: Supplementary file 4 — Additional file 4: Table S3. The list of Mendelian-inherited disease variants showing large differentiation between populations (Diffpop > 0.1). [file 13059_2019_1838_MOESM4_ESM.xlsx]

## Sheet: Sheet1
chr	pos	ref	alt	rsid	genesymbol	type	name	phenotypelist	MAXPOP	MEAN	DIFF	RD	CLNSIG	r_allele	nfe_est(gnomAD.exomes)	nfe_nwe(gnomAD.exomes)	nfe_seu(gnomAD.exomes)	nfe_onf(gnomAD.exomes)	afr(gnomAD.exomes)	amr(gnomAD.exomes)	asj(gnomAD.exomes)	eas(gnomAD.exomes)	eas_kor(gnomAD.exomes)	eas_jpn(gnomAD.exomes)	eas_oea(gnomAD.exomes)	fin(gnomAD.exomes)	nfe(gnomAD.exomes)	nfe_bgr(gnomAD.exomes)	nfe_swe(gnomAD.exomes)	sas(gnomAD.exomes)	oth(gnomAD.exomes)	afr(gnomAD.genomes)	amr(gnomAD.genomes)	asj(gnomAD.genomes)	eas(gnomAD.genomes)	fin(gnomAD.genomes)	nfe(gnomAD.genomes)	oth(gnomAD.genomes)	ACB(1KG_phase3)	ASW(1KG_phase3)	BEB(1KG_phase3)	CDX(1KG_phase3)	CEU(1KG_phase3)	CHB(1KG_phase3)	CHS(1KG_phase3)	CLM(1KG_phase3)	ESN(1KG_phase3)	FIN(1KG_phase3)	GBR(1KG_phase3)
11	2930440	G	A	rs78838117	SLC22A18	single nucleotide variant	NM_002555.5(SLC22A18):c.257G>A (p.Arg86His)	Rhabdomyosarcoma, somatic	BTQ(AAGC)	0.023111	0.310222	13.4231	Pathogenic	A	0	6.88089e-05	0	0.000128568	0.000661594	0.0428469	0.000641849	0.0699418	0.0509331	0.2	0.0753769	0	7.49878e-05	0	0	0.00213811	0.00771912	0.000230044	0.0318396	0	0.0661104	0	0.00032417	0.00275735	0	0	0.0116279	0.134409	0	0.0291262	0.0285714	0	0	0	0
13	20763612	C	T	rs72474224	GJB2	single nucleotide variant	NM_004004.5(GJB2):c.109G>A (p.Val37Ile)	Deafness, X-linked 2;Deafness, autosomal dominant 3a;Deafness, autosomal dominant 3a;Deafness, autosomal recessive 1A;Deafness, autosomal recessive 1A;Hearing impairment;Hystrix-like ichthyosis with deafness;Keratitis-ichthyosis-deafness syndrome, autosomal dominant;Keratoderma palmoplantar deafness;Knuckle pads, deafness AND leukonychia syndrome;Mutilating keratoderma;Nonsyndromic hearing loss a…	CDX(1KG_phase3)	0.014782	0.157261	10.6387	Likely_pathogenic	T	0	0.000742906	0.00156904	0.00161781	0.00086122	0.00263158	0.0080581	0.0827444	0.00838135	0.0131579	0.103161	0.00180322	0.00132572	0.00262172	0.00168402	0.000392362	0.00440744	0.00126321	0.00471698	0.00689655	0.0917843	0.000863061	0.00187921	0.00368324	0	0	0	0.172043	0	0.038835	0.0666667	0.00531915	0	0	0
1	206566903	G	A	rs2987927	SRGAP2	single nucleotide variant	NM_015326.4(SRGAP2):c.704G>A (p.Arg235His)	Intellectual disability	amr(gnomAD.genomes)	0.010817	0.110522	10.2174	Likely_pathogenic	A	0	0.00397309	0.000189538	0.00308481	0.000366032	0.00581351	0.0030015	0.00681302	0.00579414	0	0.00717939	0.000197765	0.0023478	0.00161551	0.000284252	0.00367974	0.003924	0.0335157	0.121339	0.0878378	0.0786082	0.0482931	0.0491312	0.0593472	0	0	0	0	0	0	0	0	0	0.00505051	0
11	5248232	T	A	rs334	HBB	single nucleotide variant	NM_000518.5(HBB):c.20A>T (p.Glu7Val)	Beta-thalassemia, dominant inclusion body type;Fetal hemoglobin quantitative trait locus 1;HEMOGLOBIN JAMAICA PLAIN;HEMOGLOBIN S;HEMOGLOBIN S (ANTILLES);HEMOGLOBIN S (CAMEROON);HEMOGLOBIN S (PROVIDENCE);HEMOGLOBIN S (TRAVIS);HEMOGLOBIN ZIGUINCHOR;HEMOGLOBIN ZIGUINCHOR;Hb SS disease;Hb SS disease;Heinz body anemia;Inborn genetic diseases;Malaria, resistance to;Sickle cell-Hemoglobin O Arab disease…	YRI(1KG_phase3)	0.013085	0.125804	9.61437	Pathogenic	A	0	4.7515e-05	0.000174216	6.46914e-05	0.046998	0.00216951	0	0	0	0	0	0	5.28495e-05	0	0	0.000620591	0.00163026	0.0409968	0.00117925	0	0	0	0.000129618	0.00183824	0.046875	0.0163934	0	0	0	0	0	0.0106383	0.121212	0	0
6	151726371	C	T	rs115079861	RMND1	single nucleotide variant	NM_017909.3(RMND1):c.1349G>A (p.Ter450=)	not provided;not specified	ESN(1KG_phase3)	0.011653	0.109559	9.40178	Pathogenic	T	0	0.000190141	8.70322e-05	0.000193999	0.0545814	0.00211828	0	0	0	0	0	0.000461936	0.000167354	0.000374532	0.000114819	0.000130967	0.00114342	0.0586477	0.00117925	0	0	0.00115141	0.000194603	0.00643382	0.046875	0.0409836	0	0	0	0	0	0	0.121212	0	0
1	16464489	C	T	rs34192549	EPHA2	single nucleotide variant	NM_004431.4(EPHA2):c.1171G>A (p.Gly391Arg)	Age-related cortical cataract;Cataract 6, multiple types;Squamous cell lung carcinoma;not specified	PEL(1KG_phase3)	0.016621	0.142203	8.55562	Likely_pathogenic	T	0.0125	0.0165907	0.0100157	0.0152439	0.00376218	0.102497	0.00426926	0.00114279	0.00131096	0	0.00111019	0.00952425	0.0151024	0.00825826	0.0154932	0.0152584	0.0207516	0.00309846	0.0825472	0.00344828	0	0.00690449	0.0159368	0.0165746	0	0.00819672	0.0174419	0	0.010101	0	0	0.0319149	0	0.010101	0.021978
6	46677098	C	A	rs76863441	PLA2G7	single nucleotide variant	NM_001168357.1(PLA2G7):c.835G>T (p.Val279Phe)	Platelet-activating factor acetylhydrolase deficiency	eas_jpn(gnomAD.exomes)	0.024356	0.205907	8.45406	Pathogenic	A	0.00416667	2.3771e-05	0.000174277	0.000453368	0	8.67855e-05	0.00198491	0.0575313	0.124476	0.230263	0.0379975	9.27128e-05	0.0001851	0.000750188	3.82819e-05	0.000718907	0.00245339	0	0	0.00344828	0.0359435	0	0.00032438	0.00184502	0	0	0	0.0537634	0	0.0436893	0.0857143	0	0	0	0
1	115222237	T	A	rs34526199	AMPD1	single nucleotide variant	NM_000036.2(AMPD1):c.959A>T (p.Lys320Ile)	Muscle AMP deaminase deficiency;not provided	LN(AAGC)	0.020105	0.153675	7.64362	Pathogenic	A	0.053719	0.031743	0.0219924	0.0340733	0.00436762	0.0155238	0.0241071	0	0	0	0	0.0830253	0.0334845	0.0340824	0.0404102	0.0154504	0.0296417	0.00546766	0.0188679	0.03125	0	0.0841014	0.038912	0.0481481	0	0	0.0174419	0	0.0353535	0	0	0.0265957	0	0.0757576	0.0274725
16	16313545	C	T	rs55778939	ABCC6	single nucleotide variant	NM_001171.5(ABCC6):c.346-6G>A	Pseudoxanthoma elasticum	nfe_swe(gnomAD.exomes)	0.021124	0.145543	6.88994	Pathogenic	T	0.05	0.0478562	0	0.0490099	0.00720243	0.0228193	0.0158103	0	0	0	0	0.0260274	0.0480536	0	0.166667	0.00483092	0.0369792	0.00921435	0.0214646	0.018018	0.00132275	0.0368116	0.0519942	0.034188	0.015625	0.00819672	0	0	0.0454545	0	0	0.0265957	0	0.030303	0.032967
2	215910574	G	C	rs11891778	ABCA12	single nucleotide variant	NM_173076.2(ABCA12):c.859C>G (p.Arg287Gly)	Congenital ichthyosiform erythroderma;not provided	ESN(1KG_phase3)	0.029017	0.188155	6.4843	Pathogenic	C	0	0.000477464	0.000873362	0.000520224	0.124366	0.00604862	0	0	0	0	0	0	0.000415731	0	3.83848e-05	0.000130959	0.00608353	0.119715	0.0106132	0	0	0	0.00045425	0.00461255	0.161458	0.122951	0	0	0	0	0	0.0106383	0.217172	0	0
19	1221293	C	T	rs9282859	STK11	single nucleotide variant	NM_000455.4(STK11):c.816C>T (p.Tyr272=)	Hereditary cancer-predisposing syndrome;Peutz-Jeghers syndrome;not specified	ESN(1KG_phase3)	0.016905	0.109358	6.46897	Pathogenic	T	0	0.00040889	0.000542888	0.000336247	0.0820396	0.00401312	0	0	0	0	0	0	0.000317052	0.000380518	3.97393e-05	0.000265834	0.00269088	0.0882015	0.00353774	0	0.000641849	0	0.000584036	0.00827206	0.0833333	0.0409836	0	0	0	0	0	0.00531915	0.126263	0	0
4	3162034	C	T	rs34315806	HTT	single nucleotide variant	NM_002111.8(HTT):c.3785C>T (p.Thr1262Met)	Lopes-Maciel-Rodan syndrome	ESN(1KG_phase3)	0.019036	0.112277	5.89814	Pathogenic	T	0	0.000651042	0.00249252	0.0012785	0.0812017	0.00497291	0.000116795	0	0	0	0	0	0.000883971	0	0.000448833	0.000175254	0.00432802	0.076057	0.00943396	0	0	0	0.000583355	0.00644567	0.0989583	0.0983607	0	0	0	0	0	0.0106383	0.131313	0	0
19	45912070	A	G	rs3212989	CD3EAP;ERCC1	single nucleotide variant	NM_001297590.1(CD3EAP):c.850A>G (p.Thr284Ala)	not provided	MKK(HapMap)	0.01823	0.10677	5.85683	Pathogenic	G	0	0.000374869	0.000875657	0.000489908	0.0671725	0.0034407	0.0112348	0	0	0	0	0	0.000387094	0.000374813	7.65638e-05	0.00019604	0.00277778	0.0677167	0.00353774	0.0206897	0	0	0.000518941	0.00830258	0.078125	0.0409836	0	0	0	0	0	0.0106383	0.0656566	0	0
8	67091182	G	T	rs12721510	CRH	single nucleotide variant	NM_000756.3(CRH):c.-669C>A	Autosomal dominant nocturnal frontal lobe epilepsy	Mordovians(Estonian_Biocentre)	0.021678	0.111655	5.15061	Pathogenic	T	NA	NA	NA	NA	NA	NA	NA	NA	NA	NA	NA	NA	NA	NA	NA	NA	NA	0.0118201	0.0306604	0.0724138	0.000641026	0.0584005	0.0609345	0.0441989	0.015625	0.0163934	0	0	0.0505051	0	0	0.0212766	0	0.0555556	0.0274725
3	46412262	C	T	rs41469351	CCR5	single nucleotide variant	NM_000579.3(CCR5):c.-229C>T	Human immunodeficiency virus type 1, increased perinatal transmission of	GWD(1KG_phase3)	0.061599	0.301233	4.89023	Pathogenic	T	NA	NA	NA	NA	NA	NA	NA	NA	NA	NA	NA	NA	NA	NA	NA	NA	NA	0.197032	0.00589623	0	0	0	0.000194502	0.00643382	0.192708	0.147541	0	0	0	0	0	0.0212766	0.242424	0	0
12	112241766	G	A	rs671	ALDH2	single nucleotide variant	NM_000690.3(ALDH2):c.1510G>A (p.Glu504Lys)	Acute alcohol sensitivity;Alcohol dependence;Esophageal cancer, alcohol-related, susceptibility to;Sublingual nitroglycerin, susceptibility to poor response to;Susceptibility to hangover	eas_oea(gnomAD.exomes)	0.048968	0.228194	4.66006	Pathogenic,_protective,_risk_factor	A	0	0	9.29887e-05	3.35661e-05	0.000194452	0.000389852	0	0.254418	0.171207	0.21875	0.277162	4.7081e-05	2.74253e-05	0	4.06438e-05	0.000269778	0.00554622	0.000230097	0.00117925	0	0.267141	0.000288351	0	0.00277264	0.00520833	0	0	0.0430108	0	0.160194	0.271429	0	0	0	0
8	41655164	A	G	rs77173848	ANK1	single nucleotide variant	NM_000037.3(ANK1):c.-108T>C	Spherocytosis, type 1, autosomal recessive	ACB(1KG_phase3)	0.02782	0.12843	4.61646	Pathogenic	G	NA	NA	NA	NA	NA	NA	NA	NA	NA	NA	NA	NA	NA	NA	NA	NA	NA	0.112339	0.0153302	0.0137931	0	0.015544	0.0158503	0.012939	0.15625	0.0737705	0.00581395	0	0.010101	0	0	0.0212766	0.141414	0.0151515	0.010989
18	44682490	A	G	rs150586939	IER3IP1	single nucleotide variant	NM_016097.4(IER3IP1):c.*58T>C	Rolandic epilepsy	CHS(1KG_phase3)	0.02863	0.118989	4.1561	Pathogenic	G	NA	NA	NA	NA	NA	NA	NA	NA	NA	NA	NA	NA	NA	NA	NA	NA	NA	0.00103353	0	0.00344828	0.132051	0.00435793	0.000777907	0.00276243	0	0.00819672	0.0174419	0.0752688	0	0.101942	0.147619	0	0	0.0151515	0
6	3225580	G	A	rs777598117	TUBB2B	single nucleotide variant	NM_178012.4(TUBB2B):c.743C>T (p.Ala248Val)	not provided	eas_jpn(gnomAD.exomes)	0.042298	0.170468	4.03017	Likely_pathogenic	A	0	0.000725415	0.0112967	0.00330611	0.182016	0.0304972	0.00430787	0.114538	0.0604964	0.212766	0.127868	0.025616	0.00238016	0.0156863	0.0058346	0.0511416	0.0165157	0.0909307	0.00522648	0	0.0478842	0.003003	0.000182017	0.00294118	NA	NA	NA	NA	NA	NA	NA	NA	NA	NA	NA
12	6925407	C	T	rs28919570	CD4	single nucleotide variant	NM_000616.4(CD4):c.793C>T (p.Arg265Trp)	Okt4 epitope deficiency	GWD(1KG_phase3)	0.052792	0.212695	4.02892	Pathogenic	T	0	0.00155988	0.00226205	0.00151986	0.203852	0.0121733	0.0154885	0.0291399	0.0345731	0.0723684	0.0272463	0	0.00131702	0.0011236	0.000306115	0.00467076	0.010101	0.195602	0.0141509	0.00689655	0.0320513	0	0.00110304	0.0165441	0.177083	0.213115	0.0174419	0.0268817	0	0.0291262	0.0285714	0.0319149	0.212121	0	0
10	70645376	A	C	rs10509305	STOX1	single nucleotide variant	NM_001130161.2(STOX1):c.1824A>C (p.Glu608Asp)	Preeclampsia/eclampsia 4	Onge(HuOrigin)	0.186437	0.722654	3.87613	Pathogenic	C	0.256198	0.215467	0.211053	0.223825	0.0595376	0.307492	0.241557	0.0815997	0.11891	0.186567	0.0704406	0.26089	0.220043	0.243619	0.224125	0.237011	0.215418	0.0579044	0.27896	0.248276	0.0750963	0.260357	0.226706	0.216912	0.0833333	0.057377	0.22093	0.0430108	0.287879	0.0582524	0.047619	0.244681	0.040404	0.272727	0.164835
16	50756774	C	T	rs5743289	NOD2	single nucleotide variant	NM_022162.2(NOD2):c.2798+158C>T	Blau syndrome;Inflammatory bowel disease 1;Yao syndrome	French(HGDP)	0.071042	0.268244	3.77585	Pathogenic,_risk_factor	T	NA	NA	NA	NA	NA	NA	NA	NA	NA	NA	NA	NA	NA	NA	NA	NA	NA	0.0289655	0.104953	0.168966	0	0.0630422	0.160266	0.107407	0.015625	0.0737705	0.0174419	0	0.20202	0	0	0.12766	0	0.0808081	0.159341
1	159174683	T	C	rs2814778	ACKR1	single nucleotide variant	NM_002036.3(ACKR1):c.-67T>C	DUFFY BLOOD GROUP SYSTEM, FY(a-b-) PHENOTYPE;Plasmodium vivax, resistance to;White blood cell count quantitative trait locus 1	ESN(1KG_phase3);GWD(1KG_phase3);LWK(1KG_phase3);MSL(1KG_phase3);YRI(HapMap)	0.219937	0.780063	3.54676	Pathogenic,_association,_protective	C	NA	NA	NA	NA	NA	NA	NA	NA	NA	NA	NA	NA	NA	NA	NA	NA	NA	0.827761	0.0545024	0.0206897	0	0.000863558	0.00311607	0.053407	0.885417	0.795082	0	0	0	0	0	0.0744681	1	0	0
19	11210912	C	T	rs2228671	LDLR	single nucleotide variant	NM_000527.4(LDLR):c.81C>T (p.Cys27=)	Familial hypercholesterolemia;not specified	Lezgins(Estonian_Biocentre)	0.067387	0.238169	3.53435	Pathogenic	T	0.075	0.123732	0.111304	0.114152	0.0367747	0.0650515	0.0950536	0.00956938	0.00314301	0	0.0113715	0.107218	0.11596	0.115067	0.108067	0.0715079	0.0994457	0.0406401	0.0790094	0.0827586	0.0115681	0.107595	0.115464	0.078125	0.0208333	0.0409836	0.0581395	0.0215054	0.10101	0	0.0190476	0.111702	0.030303	0.0858586	0.0879121
10	54531235	C	T	rs1800450	MBL2	single nucleotide variant	NM_000242.2(MBL2):c.161G>A (p.Gly54Asp)	Mannose-binding protein deficiency	Karitiana(HGDP)	0.135443	0.435986	3.21896	Pathogenic	T	0.181818	0.140087	0.151228	0.145739	0.030454	0.169115	0.134829	0.169603	0.202568	0.197368	0.160588	0.136112	0.144789	0.155056	0.146996	0.140099	0.140176	0.0345421	0.15684	0.117241	0.16303	0.139689	0.142347	0.132841	0.015625	0.0409836	0.139535	0.123656	0.146465	0.135922	0.171429	0.207447	0.0151515	0.131313	0.10989
6	26091179	C	G	rs1799945	HFE	single nucleotide variant	NM_000410.3(HFE):c.187C>G (p.His63Asp)	Hemochromatosis type 1;Hereditary hemochromatosis;Microvascular complications of diabetes 7;not provided	BTQ(AAGC)	0.081501	0.251832	3.08993	Pathogenic,_other,_risk_factor	G	0.0991736	0.150853	0.156815	0.153126	0.027436	0.100428	0.107341	0.0346852	0.0515977	0.0197368	0.0303661	0.103631	0.144141	0.132584	0.118658	0.0802522	0.119583	0.0269991	0.0969267	0.106897	0.0269576	0.102188	0.145222	0.127306	0.0208333	0.0491803	0.0290698	0.0215054	0.131313	0.0291262	0.0285714	0.148936	0.00505051	0.111111	0.181319
8	11430641	C	T	rs61199332	BLK	single nucleotide variant	NC_000008.11:g.11573132C>T	Maturity-onset diabetes of the young, type 11	GWD(1KG_phase3)	0.04768	0.142585	2.99046	Pathogenic	T	NA	NA	NA	NA	NA	NA	NA	NA	NA	NA	NA	NA	NA	NA	NA	NA	NA	0.163146	0.0330189	0.0413793	0.00320513	0.0123777	0.020666	0.0275735	0.15625	0.122951	0.0406977	0.0268817	0.0151515	0	0	0.00531915	0.176768	0.00505051	0.021978
2	48025764	C	T	rs1800937	MSH6	single nucleotide variant	NM_000179.2(MSH6):c.642C>T (p.Tyr214=)	Hereditary cancer-predisposing syndrome;Hereditary nonpolyposis colorectal cancer type 5;Lynch syndrome;not specified	FIN(1KG_phase3)	0.040558	0.116008	2.8603	Pathogenic	T	0.128205	0.111231	0.0683371	0.102102	0.016758	0.0335594	0.0375723	5.46627e-05	0	0	6.97156e-05	0.148606	0.106992	0.0796394	0.12545	0.0168205	0.0670171	0.0197565	0.0471698	0.0310345	0	0.14672	0.110657	0.104972	0.0104167	0.0245902	0.00581395	0	0.121212	0	0	0.0691489	0	0.156566	0.104396
16	16263663	G	A	rs2856585	ABCC6	single nucleotide variant	NM_001171.5(ABCC6):c.2835C>T (p.Pro945=)	Pseudoxanthoma elasticum	Nganasans(Estonian_Biocentre)	0.129956	0.370044	2.84746	Pathogenic	A	0.0631068	0.0616895	0.0685139	0.0641264	0.127716	0.0914712	0.0687058	0.246465	0.263761	0.21875	0.24233	0.06867	0.0633531	0.0485762	0.0680112	0.065416	0.0838829	0.128532	0.108491	0.0758621	0.256145	0.0726225	0.0534069	0.0698529	0.114583	0.122951	0.0813953	0.177419	0.0555556	0.247573	0.233333	0.12234	0.151515	0.0606061	0.0714286
3	10331457	G	T	rs696217	GHRL	single nucleotide variant	NM_001134944.1(GHRL):c.178C>A (p.Leu60Met)	Metabolic syndrome, susceptibility to;Obesity, age at onset of	Hazara(HGDP)	0.096302	0.244607	2.54	Pathogenic,_risk_factor	T	0.0454545	0.0790872	0.0853765	0.0771292	0.0182702	0.0477967	0.12562	0.189158	0.178104	0.230263	0.191652	0.131236	0.080747	0.0745877	0.0866304	0.0908081	0.0887911	0.0212079	0.0601415	0.113793	0.194444	0.127089	0.0750098	0.0847145	0.015625	0.0409836	0.110465	0.198925	0.0858586	0.160194	0.209524	0.0904255	0	0.0959596	0.0824176
6	135426573	A	G	rs4895441	-	single nucleotide variant	NC_000006.12:g.135105435A>G	Fetal hemoglobin quantitative trait locus 2	Koryaks(Estonian_Biocentre)	0.201231	0.498769	2.47859	Likely_pathogenic	G	NA	NA	NA	NA	NA	NA	NA	NA	NA	NA	NA	NA	NA	NA	NA	NA	NA	0.0934483	0.199292	0.22069	0.263496	0.346287	0.273643	0.252757	0.114583	0.163934	0.0988372	0.16129	0.247475	0.286408	0.285714	0.164894	0.0606061	0.383838	0.21978
8	11606364	G	C	rs10503425	GATA4	single nucleotide variant	NM_002052.4(GATA4):c.617-64G>C	Congenital heart disease	nfe(gnomAD.genomes)	0.054187	0.133435	2.46249	Pathogenic	C	NA	NA	NA	NA	NA	NA	NA	NA	NA	NA	NA	NA	NA	NA	NA	NA	NA	0.0251377	0.0542453	0.158621	0.000641026	0.148532	0.187622	0.154696	0.0208333	0.0327869	0.0174419	0	0.176768	0	0.0047619	0.117021	0	0.171717	0.153846
8	11612842	G	A	rs3729851	GATA4	single nucleotide variant	NM_002052.4(GATA4):c.997+200G>A	Congenital heart disease	Basque(HGDP);Italian(HGDP)	0.074702	0.175298	2.34663	Pathogenic	A	NA	NA	NA	NA	NA	NA	NA	NA	NA	NA	NA	NA	NA	NA	NA	NA	NA	0.0275609	0.0825472	0.158621	0	0.0860184	0.137761	0.0948435	0.015625	0.0163934	0.0290698	0	0.19697	0	0	0.170213	0	0.106061	0.159341
7	142458526	A	G	rs144422014	PRSS1	single nucleotide variant	NM_002769.4(PRSS1):c.161A>G (p.Asn54Ser)	Hereditary pancreatitis	afr(gnomAD.genomes)	0.135666	0.28705	2.11586	Pathogenic	G	0	0.000294447	0	0.00049636	0.00087007	0.000182548	0.000935454	0	0	0	0	5.67666e-05	0.000252265	0	8.27061e-05	0.000269687	0	0.422716	0.307317	0.0428571	0.0871795	0.37027	0.158657	0.287162	NA	NA	NA	NA	NA	NA	NA	NA	NA	NA	NA
16	16243973	C	T	rs3902401	ABCC6	single nucleotide variant	NM_001171.5(ABCC6):c.*17G>A	Pseudoxanthoma elasticum	BEB(1KG_phase3)	0.069633	0.145483	2.08928	Pathogenic	T	0.0446429	0.0662411	0.0878212	0.0646101	0.0349105	0.0410864	0.0810594	0.0435827	0.0551471	0.0540541	0.0404069	0.029218	0.0658747	0.0889328	0.0549852	0.146612	0.069779	0.0426829	0.0459906	0.0827586	0.0392031	0.031106	0.061762	0.0588235	0.0364583	0.0491803	0.215116	0.0268817	0.0656566	0.0582524	0.047619	0.0478723	0.0454545	0.030303	0.0384615
19	13007458	C	T	rs11085825	GCDH	single nucleotide variant	NM_000159.3(GCDH):c.852+223C>T	Glutaric aciduria, type 1	Karitiana(HuOrigin)	0.312442	0.604225	1.93388	Likely_pathogenic	T	NA	NA	NA	NA	NA	NA	NA	NA	NA	NA	NA	NA	NA	NA	NA	NA	NA	0.208085	0.42654	0.262069	0.14129	0.297344	0.360736	0.337316	0.213542	0.237705	0.203488	0.182796	0.318182	0.135922	0.0952381	0.37766	0.19697	0.358586	0.302198
16	16251599	C	T	rs2238472	ABCC6	single nucleotide variant	NM_001171.5(ABCC6):c.3803G>A (p.Arg1268Gln)	Pseudoxanthoma elasticum;not provided	Karitiana(HGDP)	0.198191	0.373238	1.88322	Pathogenic	T	0.258475	0.287524	0.228225	0.275173	0.101689	0.311697	0.167494	0.122361	0.152174	0.171053	0.113949	0.345505	0.280433	0.250377	0.301428	0.18134	0.248612	0.104522	0.300236	0.155172	0.121309	0.343516	0.290755	0.293358	0.0677083	0.139344	0.174419	0.102151	0.247475	0.101942	0.0904762	0.308511	0.040404	0.393939	0.340659
8	11616836	G	A	rs804290	GATA4	single nucleotide variant	NM_002052.4(GATA4):c.*852G>A	Congenital heart disease	CEU(HapMap)	0.114968	0.200184	1.74121	Pathogenic	A	NA	NA	NA	NA	NA	NA	NA	NA	NA	NA	NA	NA	NA	NA	NA	NA	NA	0.046936	0.126478	0.210345	0.00128205	0.155926	0.227969	0.177122	0.0416667	0.0409836	0.162791	0	0.29798	0	0	0.212766	0.00505051	0.181818	0.291209
17	32579788	A	G	rs1024611	CCL2	single nucleotide variant	NG_012123.1:g.2493A>G	Coronary artery disease, development of, in hiv;Coronary artery disease, modifier of;Mycobacterium tuberculosis, susceptibility to;Spina bifida, susceptibility to	Karitiana(HGDP)	0.366424	0.633576	1.72908	Pathogenic,_risk_factor	G	NA	NA	NA	NA	NA	NA	NA	NA	NA	NA	NA	NA	NA	NA	NA	NA	NA	0.195492	0.489362	0.241379	0.559923	0.350029	0.27501	0.31768	0.223958	0.270492	0.412791	0.413978	0.323232	0.635922	0.595238	0.414894	0.207071	0.363636	0.324176
11	13514053	G	T	rs6256	PTH	single nucleotide variant	NM_000315.3(PTH):c.247C>A (p.Arg83=)	Hypoparathyroidism familial isolated;not specified	STU(1KG_phase3);SSIP(SGVP)	0.157995	0.258672	1.63722	Pathogenic	T	0.132231	0.152778	0.181597	0.15853	0.0630614	0.0767139	0.200099	0.119985	0.130435	0.0986842	0.117443	0.133041	0.157274	0.165543	0.15173	0.322576	0.162484	0.067621	0.0933806	0.203448	0.123705	0.14384	0.15415	0.168843	0.0416667	0.0901639	0.319767	0.102151	0.161616	0.135922	0.138095	0.111702	0.0454545	0.207071	0.10989
8	11615695	A	G	rs745379	GATA4	single nucleotide variant	NM_002052.4(GATA4):c.1147-107A>G	Congenital heart disease	asj(gnomAD.genomes)	0.24971	0.382234	1.53071	Pathogenic	G	NA	NA	NA	NA	NA	NA	NA	NA	NA	NA	NA	NA	NA	NA	NA	NA	NA	0.249424	0.256501	0.631944	0.0192308	0.361543	0.510225	0.434502	0.302083	0.278689	0.215116	0.00537634	0.585859	0.0194175	0.0142857	0.484043	0.191919	0.40404	0.615385
11	48145375	A	C	rs1566734	PTPRJ	single nucleotide variant	NM_002843.3(PTPRJ):c.827A>C (p.Gln276Pro)	Carcinoma of colon	BedouinB(HuOrigin)	0.18778	0.285904	1.52255	Pathogenic	C	0.12605	0.157358	0.232516	0.162616	0.119367	0.0970335	0.235148	0.275674	0.198846	0.25	0.296255	0.10122	0.160101	0.197526	0.126177	0.266712	0.180026	0.119333	0.125	0.231034	0.293059	0.0910663	0.148591	0.127757	0.140625	0.139344	0.296512	0.462366	0.151515	0.18932	0.338095	0.117021	0.0959596	0.0959596	0.120879
8	11614769	C	T	rs12156163	GATA4	single nucleotide variant	NM_002052.4(GATA4):c.1146+177C>T	Congenital heart disease	GIH(1KG_phase3)	0.119649	0.171613	1.4343	Pathogenic	T	NA	NA	NA	NA	NA	NA	NA	NA	NA	NA	NA	NA	NA	NA	NA	NA	NA	0.0462793	0.121462	0.210345	0.0012837	0.151873	0.223189	0.175551	0.0416667	0.0491803	0.162791	0	0.287879	0	0	0.212766	0.00505051	0.186869	0.285714
16	16278863	G	T	rs8058694	ABCC6	single nucleotide variant	NM_001171.5(ABCC6):c.1896C>A (p.His632Gln)	Pseudoxanthoma elasticum	Karitiana(HGDP)	0.327695	0.458019	1.3977	Pathogenic	T	0.475207	0.501874	0.44267	0.492885	0.349982	0.470173	0.425779	0.158725	0.188417	0.236842	0.150042	0.446815	0.490169	0.441598	0.493979	0.261499	0.444589	0.348843	0.46564	0.416667	0.147097	0.441109	0.494695	0.430556	0.354167	0.360656	0.226744	0.129032	0.505051	0.160194	0.128571	0.441489	0.29798	0.505051	0.483516
2	63131731	G	A	rs721048	EHBP1	single nucleotide variant	NM_001142615.2(EHBP1):c.1185+30064G>A	Prostate cancer, hereditary, 12	IBS(1KG_phase3)	0.091509	0.123444	1.34898	Pathogenic	A	NA	NA	NA	NA	NA	NA	NA	NA	NA	NA	NA	NA	NA	NA	NA	NA	NA	0.0364452	0.152123	0.170139	0.039897	0.148906	0.172949	0.151934	0.0208333	0.0655738	0.110465	0.0268817	0.136364	0.038835	0.047619	0.180851	0	0.161616	0.203297
16	16271409	G	A	rs9924755	ABCC6	single nucleotide variant	NM_001171.5(ABCC6):c.2490C>T (p.Ala830=)	Pseudoxanthoma elasticum	GWD(1KG_phase3)	0.134343	0.179816	1.33848	Pathogenic	A	0.136364	0.147502	0.148512	0.151296	0.254277	0.156019	0.234915	0.072749	0.0919811	0.125	0.0671104	0.124584	0.145192	0.14093	0.133287	0.0590214	0.142741	0.251608	0.173349	0.256944	0.0641026	0.123272	0.144173	0.121072	0.28125	0.237705	0.0465116	0.0537634	0.166667	0.0873786	0.0619048	0.111702	0.277778	0.151515	0.126374
16	16281007	A	G	rs12931472	ABCC6	single nucleotide variant	NM_001171.5(ABCC6):c.1841T>C (p.Val614Ala)	Pseudoxanthoma elasticum	Karitiana(HGDP)	0.337141	0.448573	1.33052	Pathogenic	G	0.482906	0.506803	0.448834	0.497381	0.377778	0.475923	0.440151	0.153402	0.18146	0.226667	0.145211	0.450433	0.494071	0.449924	0.493933	0.26767	0.455665	0.381885	0.468085	0.431034	0.145349	0.44502	0.500065	0.432657	0.390625	0.385246	0.232558	0.11828	0.505051	0.145631	0.119048	0.484043	0.292929	0.520202	0.505495
6	151936677	G	A	rs6929137	CCDC170	single nucleotide variant	NM_025059.3(CCDC170):c.1810G>A (p.Val604Ile)	Estrogen resistance	Hadza(HuOrigin)	0.33211	0.41789	1.25829	Likely_pathogenic	A	0.245833	0.333151	0.353111	0.324105	0.502519	0.199027	0.359273	0.320812	0.27702	0.238806	0.3335	0.188811	0.325769	0.31883	0.305356	0.329542	0.306446	0.498042	0.21816	0.389655	0.333763	0.1803	0.301286	0.272978	0.4375	0.418033	0.273256	0.419355	0.252525	0.330097	0.347619	0.239362	0.535354	0.19697	0.346154
5	150227998	C	T	rs10065172	IRGM	single nucleotide variant	NM_001145805.1(IRGM):c.313C>T (p.Leu105=)	Inflammatory bowel disease 19	GWD(1KG_phase3)	0.270419	0.313652	1.15987	Pathogenic	T	0.0458716	0.0837612	0.157922	0.0968699	0.455143	0.143146	0.174712	0.439668	0.39716	0.381579	0.449855	0.0816086	0.0900362	0.119388	0.0652921	0.203865	0.161052	0.451001	0.146226	0.175862	0.456996	0.08084	0.0755158	0.126838	0.432292	0.483607	0.215116	0.451613	0.0505051	0.432039	0.509524	0.143617	0.510101	0.0656566	0.0714286
20	23618427	C	T	rs1064039	CST3	single nucleotide variant	NM_000099.3(CST3):c.73G>A (p.Ala25Thr)	Age-related macular degeneration 11	BEB(1KG_phase3)	0.190225	0.193496	1.0172	Pathogenic	T	0.227848	0.223803	0.167497	0.205684	0.243339	0.094058	0.164307	0.13152	0.134993	0.0909091	0.130736	0.23251	0.215194	0.180401	0.224337	0.29741	0.180507	0.210526	0.115202	0.15625	0.128205	0.225145	0.212891	0.199816	0.239583	0.254098	0.383721	0.0591398	0.222222	0.165049	0.12381	0.196809	0.166667	0.257576	0.17033
2	60720246	C	T	rs11886868	BCL11A	single nucleotide variant	NM_018014.3(BCL11A):c.386-24278G>A	Fetal hemoglobin quantitative trait locus 5	ASW(HapMap)	0.41811	0.380741	0.910624	Likely_pathogenic	T	NA	NA	NA	NA	NA	NA	NA	NA	NA	NA	NA	NA	NA	NA	NA	NA	NA	0.713102	0.412736	0.562069	0.021181	0.618595	0.686232	0.610185	0.75	0.737705	0.360465	0.0268817	0.686869	0.0485437	0.0333333	0.547872	0.79798	0.606061	0.71978
17	3397702	C	T	rs12948217	ASPA	single nucleotide variant	NM_000049.2(ASPA):c.693C>T (p.Tyr231=)	Spongy degeneration of central nervous system;not specified	nfe_est(gnomAD.exomes)	0.203003	0.18033	0.888312	Pathogenic	T	0.383333	0.305695	0.301739	0.311854	0.232763	0.191674	0.282298	0.0444215	0.0484547	0.0333333	0.0434692	0.338632	0.312034	0.308614	0.326701	0.218589	0.277542	0.239356	0.213443	0.289655	0.0526992	0.314014	0.31915	0.302026	0.270833	0.204918	0.168605	0.0430108	0.323232	0.0631068	0.052381	0.281915	0.262626	0.308081	0.307692
6	151948366	G	A	rs2046210	CCDC170	single nucleotide variant	NC_000006.12:g.151627231G>A	Estrogen resistance	GWD(1KG_phase3)	0.390179	0.339909	0.871162	Likely_pathogenic	A	NA	NA	NA	NA	NA	NA	NA	NA	NA	NA	NA	NA	NA	NA	NA	NA	NA	0.621226	0.238771	0.368966	0.357786	0.198792	0.323736	0.310886	0.59375	0.57377	0.302326	0.435484	0.287879	0.364078	0.37619	0.265957	0.651515	0.217172	0.346154
7	142458451	A	T	rs111033566	PRSS1	single nucleotide variant	NM_002769.4(PRSS1):c.86A>T (p.Asn29Ile)	Hereditary pancreatitis;not specified	nfe_swe(gnomAD.exomes)	0.272942	0.218851	0.801822	Pathogenic	T	0.135714	0.132907	0.47036	0.328701	0.227408	0.228903	0.32241	0.221954	0.255353	0.122222	0.212978	0.267096	0.312187	0.277465	0.491793	0.319222	0.229246	0.345459	0.357724	0.0322581	0.451794	0.480561	0.196125	0.325581	NA	NA	NA	NA	NA	NA	NA	NA	NA	NA	NA
16	16291971	C	T	rs9940825	ABCC6	single nucleotide variant	NM_001171.5(ABCC6):c.1245G>A (p.Val415=)	Pseudoxanthoma elasticum	nfe_est(gnomAD.exomes)	0.218481	0.1532	0.701205	Pathogenic	T	0.371681	0.349282	0.316079	0.353451	0.25572	0.263368	0.216252	0.0947282	0.0772871	0.0583333	0.099678	0.306375	0.346996	0.320343	0.35159	0.217017	0.302333	0.244644	0.261792	0.232639	0.092545	0.300576	0.340847	0.299632	0.192708	0.270492	0.209302	0.102151	0.363636	0.0728155	0.104762	0.351064	0.227273	0.333333	0.291209
16	16278869	G	C	rs8058696	ABCC6	single nucleotide variant	NM_001171.5(ABCC6):c.1890C>G (p.Thr630=)	Pseudoxanthoma elasticum	PEL(1KG_phase3)	0.3219	0.207512	0.644647	Pathogenic	C	0.470833	0.50159	0.441834	0.492817	0.349778	0.469939	0.425779	0.158616	0.188417	0.236842	0.149903	0.446338	0.489872	0.442018	0.493591	0.261499	0.444426	0.348832	0.46564	0.416667	0.146907	0.441431	0.49496	0.42976	0.354167	0.360656	0.226744	0.129032	0.505051	0.160194	0.128571	0.441489	0.29798	0.505051	0.483516
8	11617240	A	T	rs12458	GATA4	single nucleotide variant	NM_002052.4(GATA4):c.*1256A>T	Congenital heart disease	CDX(1KG_phase3)	0.406365	0.249549	0.614101	Pathogenic	T	NA	NA	NA	NA	NA	NA	NA	NA	NA	NA	NA	NA	NA	NA	NA	NA	NA	0.375806	0.321934	0.341379	0.550453	0.297523	0.326398	0.327491	0.359375	0.434426	0.436047	0.655914	0.252525	0.529126	0.519048	0.335106	0.368687	0.292929	0.368132
5	176520243	G	A	rs351855	FGFR4	single nucleotide variant	NM_213647.2(FGFR4):c.1162G>A (p.Gly388Arg)	Cancer progression and tumor cell motility	CDX(1KG_phase3)	0.320968	0.189785	0.591289	Pathogenic	A	0.356522	0.303261	0.29602	0.302498	0.130655	0.420454	0.3195	0.449572	0.394599	0.423077	0.464476	0.324668	0.30117	0.291794	0.298998	0.352041	0.318152	0.127537	0.391253	0.282759	0.463684	0.332277	0.314535	0.313076	0.125	0.180328	0.418605	0.510753	0.287879	0.441748	0.447619	0.260638	0.0959596	0.318182	0.302198
16	16291983	A	G	rs9930886	ABCC6	single nucleotide variant	NM_001171.5(ABCC6):c.1233T>C (p.Asn411=)	not provided	CDX(1KG_phase3)	0.275742	0.122107	0.442831	Pathogenic	G	0.380531	0.357711	0.324659	0.360627	0.259562	0.269727	0.227732	0.292659	0.215676	0.215517	0.313985	0.333623	0.355944	0.333466	0.363114	0.225898	0.316991	0.251611	0.266509	0.251724	0.300645	0.327089	0.353663	0.318266	0.213542	0.270492	0.232558	0.397849	0.368687	0.26699	0.32381	0.351064	0.232323	0.363636	0.291209
1	198796120	C	T	rs12406470	MIR181A1HG	single nucleotide variant	NR_040073.1(MIR181A1HG):n.364-18748G>A	Acute myeloid leukemia with maturation	GIH(1KG_phase3)	0.555502	0.226051	0.406931	Pathogenic	T	NA	NA	NA	NA	NA	NA	NA	NA	NA	NA	NA	NA	NA	NA	NA	NA	NA	0.292548	0.57565	0.6	0.556701	0.605703	0.54859	0.562615	0.307292	0.336066	0.662791	0.629032	0.489899	0.563107	0.57619	0.648936	0.323232	0.555556	0.582418
4	187158034	G	A	rs3733402	KLKB1	single nucleotide variant	NM_000892.4(KLKB1):c.428G>A (p.Ser143Asn)	Prekallikrein deficiency	LWK(1KG_phase3)	0.583026	0.235156	0.403337	Pathogenic	A	0.524793	0.513913	0.467874	0.499935	0.736036	0.628542	0.435602	0.670872	0.641771	0.664474	0.678641	0.578157	0.505868	0.457678	0.521373	0.393728	0.536669	0.742292	0.635613	0.489655	0.671171	0.596309	0.518531	0.548803	0.739583	0.737705	0.401163	0.774194	0.5	0.65534	0.690476	0.643617	0.808081	0.560606	0.510989
11	18290859	C	T	rs1136743	SAA1	single nucleotide variant	NM_000331.5(SAA1):c.209C>T (p.Ala70Val)	Serum amyloid a variant	fin(gnomAD.genomes)	0.437314	0.163448	0.373754	Pathogenic	T	0.532258	0.568843	0.437565	0.513565	0.498726	0.418387	0.366448	0.249772	0.25971	0.25	0.246745	0.552099	0.543398	0.429515	0.586841	0.410167	0.488918	0.520648	0.450739	0.416084	0.27611	0.600762	0.586198	0.552281	NA	NA	NA	NA	NA	NA	NA	NA	NA	NA	NA
1	198776931	C	A	rs9660525	-	single nucleotide variant	NC_000001.11:g.198807802C>A	Acute myeloid leukemia with maturation	KZK(AAGC)	0.505018	0.173553	0.343657	Pathogenic	A	NA	NA	NA	NA	NA	NA	NA	NA	NA	NA	NA	NA	NA	NA	NA	NA	NA	0.293629	0.507092	0.448276	0.555412	0.430588	0.397063	0.442699	0.307292	0.327869	0.604651	0.629032	0.424242	0.558252	0.580952	0.579787	0.358586	0.414141	0.450549
16	27356203	A	G	rs1805010	IL4R	single nucleotide variant	NM_000418.3(IL4R):c.223A>G (p.Ile75Val)	Acquired immunodeficiency syndrome, slow progression to;Atopy, resistance to	JPT(1KG_phase3)	0.464098	0.156094	0.336338	Pathogenic,_protective	G	0.392562	0.45782	0.45453	0.447515	0.497289	0.45434	0.401371	0.508541	0.540073	0.614865	0.499098	0.364109	0.451438	0.436937	0.446475	0.437406	0.451845	0.496318	0.451422	0.365517	0.516753	0.370317	0.432367	0.417279	0.473958	0.467213	0.430233	0.456989	0.449495	0.461165	0.504762	0.420213	0.535354	0.373737	0.483516
4	6295693	C	G	rs6446482	WFS1	single nucleotide variant	NM_006005.3(WFS1):c.713-1075C>G	Diabetes mellitus, noninsulin-dependent, association with	JPN(3.5KJPN)	0.74902	0.23508	0.31385	Pathogenic	G	NA	NA	NA	NA	NA	NA	NA	NA	NA	NA	NA	NA	NA	NA	NA	NA	NA	0.647161	0.741135	0.703448	0.940077	0.567396	0.59431	0.623389	0.645833	0.655738	0.703488	0.827957	0.646465	0.980583	0.871429	0.638298	0.661616	0.621212	0.60989
16	16291858	G	C	rs12929920	ABCC6	single nucleotide variant	NM_001171.5(ABCC6):c.1338+20C>G	Pseudoxanthoma elasticum	BTQ(AAGC)	0.774009	0.225991	0.291975	Pathogenic	C	0.831818	0.769357	0.700554	0.764444	0.514495	0.858773	0.622193	0.920178	0.912382	0.91129	0.922334	0.820769	0.764897	0.726562	0.789998	0.811043	0.753805	0.515057	0.825059	0.678322	0.915484	0.81658	0.775347	0.781599	0.515625	0.540984	0.848837	0.94086	0.737374	0.917476	0.914286	0.776596	0.479798	0.80303	0.807692
11	17298125	C	G	rs214088	NUCB2	single nucleotide variant	NM_005013.2(NUCB2):c.-406C>G	not provided	CHS(1KG_phase3)	0.669861	0.18252	0.272474	Likely_pathogenic	G	NA	NA	NA	NA	NA	NA	NA	NA	NA	NA	NA	NA	NA	NA	NA	NA	NA	0.651278	0.674941	0.696552	0.829049	0.53485	0.577068	0.588561	0.6875	0.655738	0.72093	0.844086	0.606061	0.81068	0.852381	0.632979	0.717172	0.505051	0.483516
1	198868084	G	A	rs10800597	MIR181A1HG	single nucleotide variant	NR_040073.1(MIR181A1HG):n.363+1456C>T	Acute myeloid leukemia with maturation	BTQ(AAGC)	0.79907	0.20093	0.251455	Pathogenic	A	NA	NA	NA	NA	NA	NA	NA	NA	NA	NA	NA	NA	NA	NA	NA	NA	NA	0.822011	0.754717	0.765517	0.769231	0.68098	0.660963	0.686924	0.895833	0.754098	0.877907	0.833333	0.570707	0.796117	0.790476	0.696809	0.853535	0.631313	0.708791
1	198867678	G	T	rs60639710	MIR181A1HG	single nucleotide variant	NR_040073.1(MIR181A1HG):n.363+1862C>A	Acute myeloid leukemia with maturation	BTQ(AAGC)	0.799363	0.200637	0.250996	Pathogenic	T	NA	NA	NA	NA	NA	NA	NA	NA	NA	NA	NA	NA	NA	NA	NA	NA	NA	0.819572	0.753555	0.765517	0.768831	0.682216	0.661886	0.68854	0.895833	0.754098	0.889535	0.833333	0.570707	0.791262	0.790476	0.696809	0.853535	0.631313	0.708791
16	16291871	G	C	rs9940089	ABCC6	single nucleotide variant	NM_001171.5(ABCC6):c.1338+7C>G	Pseudoxanthoma elasticum	BTQ(AAGC)	0.811834	0.188166	0.231779	Pathogenic	C	0.826087	0.773226	0.710731	0.770095	0.683066	0.872866	0.670088	0.946645	0.946803	0.92029	0.946856	0.842041	0.770088	0.737529	0.793933	0.813962	0.777047	0.676927	0.840426	0.711806	0.942655	0.837853	0.78006	0.797048	0.645833	0.672131	0.854651	0.956989	0.742424	0.966019	0.938095	0.787234	0.631313	0.823232	0.807692
1	198869514	T	C	rs10800598	MIR181A1HG	single nucleotide variant	NR_040073.1(MIR181A1HG):n.363+26A>G	Acute myeloid leukemia with maturation	BTQ(AAGC)	0.825842	0.174158	0.210885	Pathogenic	C	NA	NA	NA	NA	NA	NA	NA	NA	NA	NA	NA	NA	NA	NA	NA	NA	NA	0.876838	0.764775	0.767361	0.800649	0.681059	0.662813	0.69337	0.932292	0.852459	0.877907	0.860215	0.575758	0.849515	0.819048	0.702128	0.924242	0.631313	0.708791
8	11606312	T	C	rs3735819	GATA4	single nucleotide variant	NM_002052.4(GATA4):c.617-116T>C	Congenital heart disease	KHV(1KG_phase3);BTQ(AAGC)	0.880612	0.119388	0.135574	Pathogenic	C	NA	NA	NA	NA	NA	NA	NA	NA	NA	NA	NA	NA	NA	NA	NA	NA	NA	0.897748	0.838443	0.624138	0.984615	0.839574	0.743213	0.781768	0.901042	0.918033	0.936047	0.994624	0.641414	0.985437	0.980952	0.691489	0.944444	0.833333	0.675824
[truncated: 272 more columns]
