# Supplementary material for: PGG.SNV: understanding the evolutionary and medical implications of human single nucleotide variations in diverse populations
Source: Genome Biol. 2019 Oct 22;20:215. doi: 10.1186/s13059-019-1838-5 (PMC6805450; doi:10.1186/s13059-019-1838-5)
Supplement: Supplementary file 5 — Additional file 5: Table S4. The list of Mendelian-inherited disease variants showing large differentiation between ancestries (DiffAnces > 0.1). [file 13059_2019_1838_MOESM5_ESM.xlsx]

## Sheet: Sheet1
chr	pos	ref	alt	rsid	genesymbol	type	name	phenotypelist	MAXPOP	MEAN	DIFF	RD	CLNSIG	r_allele	Africa	SouthAsia	EastAsia	WestEurasia	America	SoutheastAsia	CentralAsiaSiberia	Oceania
1	159174683	T	C	rs2814778	ACKR1	single nucleotide variant	NM_002036.3(ACKR1):c.-67T>C	DUFFY BLOOD GROUP SYSTEM, FY(a-b-) PHENOTYPE;Plasmodium vivax, resistance to;White blood cell count quantitative trait locus 1	Africa	0.165897	0.75958	4.57862	Pathogenic,_association,_protective	C	0.925477	0	0.000119	0.006197	0.063586	0	NA	NA
12	112241766	G	A	rs671	ALDH2	single nucleotide variant	NM_000690.3(ALDH2):c.1510G>A (p.Glu504Lys)	Acute alcohol sensitivity;Alcohol dependence;Esophageal cancer, alcohol-related, susceptibility to;Sublingual nitroglycerin, susceptibility to poor response to;Susceptibility to hangover	EastAsia	0.028981	0.124425	4.29333	Pathogenic,_protective,_risk_factor	A	0.001123	0.001636	0.153406	2.8e-05	0.004672	0.013021	NA	NA
3	46412262	C	T	rs41469351	CCR5	single nucleotide variant	NM_000579.3(CCR5):c.-229C>T	Human immunodeficiency virus type 1, increased perinatal transmission of	Africa	0.051792	0.192025	3.70762	Pathogenic	T	0.243817	0	0	2.4e-05	0.015119	NA	NA	NA
2	215910574	G	C	rs11891778	ABCA12	single nucleotide variant	NM_173076.2(ABCA12):c.859C>G (p.Arg287Gly)	Congenital ichthyosiform erythroderma;not provided	Africa	0.030967	0.110726	3.57561	Pathogenic	C	0.141693	2.2e-05	0	0.0002	0.012921	NA	NA	NA
11	2930440	G	A	rs78838117	SLC22A18	single nucleotide variant	NM_002555.5(SLC22A18):c.257G>A (p.Arg86His)	Rhabdomyosarcoma, somatic	SoutheastAsia	0.045003	0.158122	3.51359	Pathogenic	A	9.9e-05	0.005283	0.046384	7.3e-05	0.015052	0.203125	NA	NA
12	6925407	C	T	rs28919570	CD4	single nucleotide variant	NM_000616.4(CD4):c.793C>T (p.Arg265Trp)	Okt4 epitope deficiency	Africa	0.048176	0.163138	3.38629	Pathogenic	T	0.211314	0.00985	0.034129	0.001701	0.021642	0.010417	NA	NA
8	11430641	C	T	rs61199332	BLK	single nucleotide variant	NC_000008.11:g.11573132C>T	Maturity-onset diabetes of the young, type 11	Africa	0.051986	0.114649	2.20538	Pathogenic	T	0.166635	0.041546	0.01071	0.028594	0.020161	0.044271	NA	NA
16	16263663	G	A	rs2856585	ABCC6	single nucleotide variant	NM_001171.5(ABCC6):c.2835C>T (p.Pro945=)	Pseudoxanthoma elasticum	Oceania	0.174743	0.237022	1.3564	Pathogenic	A	0.136993	0.085263	0.235393	0.076003	0.114977	0.102083	0.235465	0.411765
11	13514053	G	T	rs6256	PTH	single nucleotide variant	NM_000315.3(PTH):c.247C>A (p.Arg83=)	Hypoparathyroidism familial isolated;not specified	SouthAsia	0.153522	0.182924	1.19152	Pathogenic	T	0.054179	0.336446	0.156507	0.163133	0.093677	0.117188	NA	NA
11	48145375	A	C	rs1566734	PTPRJ	single nucleotide variant	NM_002843.3(PTPRJ):c.827A>C (p.Gln276Pro)	Carcinoma of colon	Oceania	0.215009	0.252428	1.17403	Pathogenic	C	0.101175	0.249173	0.24383	0.205715	0.062916	0.224516	0.165313	0.467437
16	16251599	C	T	rs2238472	ABCC6	single nucleotide variant	NM_001171.5(ABCC6):c.3803G>A (p.Arg1268Gln)	Pseudoxanthoma elasticum;not provided	America	0.168842	0.196551	1.16411	Pathogenic	T	0.083204	0.155972	0.143116	0.250746	0.365393	0.104861	0.218033	0.029412
16	16271409	G	A	rs9924755	ABCC6	single nucleotide variant	NM_001171.5(ABCC6):c.2490C>T (p.Ala830=)	Pseudoxanthoma elasticum	Africa	0.121615	0.141358	1.16234	Pathogenic	A	0.262973	0.045229	0.073107	0.159659	0.17136	0.017361	NA	NA
8	11615695	A	G	rs745379	GATA4	single nucleotide variant	NM_002052.4(GATA4):c.1147-107A>G	Congenital heart disease	WestEurasia	0.263388	0.249652	0.947849	Pathogenic	G	0.235502	0.274955	0.095457	0.51304	0.312933	0.148438	NA	NA
20	23618427	C	T	rs1064039	CST3	single nucleotide variant	NM_000099.3(CST3):c.73G>A (p.Ala25Thr)	Age-related macular degeneration 11	SouthAsia	0.178257	0.166696	0.935144	Pathogenic	T	0.20787	0.344953	0.138951	0.207377	0.120909	0.049479	NA	NA
8	11614769	C	T	rs12156163	GATA4	single nucleotide variant	NM_002052.4(GATA4):c.1146+177C>T	Congenital heart disease	WestEurasia	0.118009	0.106299	0.90077	Pathogenic	T	0.020771	0.205152	0.001897	0.224308	0.137916	NA	NA	NA
16	16278863	G	T	rs8058694	ABCC6	single nucleotide variant	NM_001171.5(ABCC6):c.1896C>A (p.His632Gln)	Pseudoxanthoma elasticum	America	0.260114	0.233759	0.898679	Pathogenic	T	0.322616	0.236638	0.168978	0.425175	0.493873	0.136806	0.267415	0.029412
16	16281007	A	G	rs12931472	ABCC6	single nucleotide variant	NM_001171.5(ABCC6):c.1841T>C (p.Val614Ala)	Pseudoxanthoma elasticum	America	0.268714	0.235417	0.876088	Pathogenic	G	0.373135	0.239531	0.16538	0.433086	0.504131	0.136806	0.26823	0.029412
6	135426573	A	G	rs4895441	-	single nucleotide variant	NC_000006.12:g.135105435A>G	Fetal hemoglobin quantitative trait locus 2	CentralAsiaSiberia	0.167841	0.144362	0.860112	Likely_pathogenic	G	0.105461	0.132302	0.290168	0.22153	0.205616	0.075446	0.312203	0
19	13007458	C	T	rs11085825	GCDH	single nucleotide variant	NM_000159.3(GCDH):c.852+223C>T	Glutaric aciduria, type 1	Oceania	0.35028	0.297829	0.85026	Likely_pathogenic	T	0.244981	0.291977	0.181547	0.346498	0.517306	0.255878	0.31594	0.648109
8	11616836	G	A	rs804290	GATA4	single nucleotide variant	NM_002052.4(GATA4):c.*852G>A	Congenital heart disease	WestEurasia	0.133301	0.10836	0.812897	Pathogenic	A	0.024068	0.216985	0.047821	0.241661	0.133855	0.135417	NA	NA
10	54531235	C	T	rs1800450	MBL2	single nucleotide variant	NM_000242.2(MBL2):c.161G>A (p.Gly54Asp)	Mannose-binding protein deficiency	America	0.130859	0.102497	0.783263	Pathogenic	T	0.043248	0.136837	0.15795	0.150828	0.233356	0.20625	0.118406	0
10	70645376	A	C	rs10509305	STOX1	single nucleotide variant	NM_001130161.2(STOX1):c.1824A>C (p.Glu608Asp)	Preeclampsia/eclampsia 4	America	0.197924	0.151789	0.766905	Pathogenic	C	0.069736	0.230116	0.121607	0.235256	0.349713	0.089931	0.276949	0.210084
2	60720246	C	T	rs11886868	BCL11A	single nucleotide variant	NM_018014.3(BCL11A):c.386-24278G>A	Fetal hemoglobin quantitative trait locus 5	Africa	0.412263	0.310003	0.751954	Likely_pathogenic	T	0.722266	0.416353	0.128139	0.672451	0.432679	0.101687	NA	NA
17	3397702	C	T	rs12948217	ASPA	single nucleotide variant	NM_000049.2(ASPA):c.693C>T (p.Tyr231=)	Spongy degeneration of central nervous system;not specified	WestEurasia	0.1803	0.133995	0.743178	Pathogenic	T	0.235124	0.228904	0.089409	0.314295	0.190631	0.023438	NA	NA
5	150227998	C	T	rs10065172	IRGM	single nucleotide variant	NM_001145805.1(IRGM):c.313C>T (p.Leu105=)	Inflammatory bowel disease 19	Africa	0.28515	0.198617	0.696535	Pathogenic	T	0.483767	0.220299	0.37242	0.103008	0.148594	0.382812	NA	NA
6	151948366	G	A	rs2046210	CCDC170	single nucleotide variant	NC_000006.12:g.151627231G>A	Estrogen resistance	Africa	0.385979	0.261124	0.676524	Likely_pathogenic	A	0.647103	0.339066	0.359932	0.315382	0.24541	0.408978	NA	NA
16	16278869	G	C	rs8058696	ABCC6	single nucleotide variant	NM_001171.5(ABCC6):c.1890C>G (p.Thr630=)	Pseudoxanthoma elasticum	America	0.300602	0.174296	0.579823	Pathogenic	C	0.334285	0.26435	0.16975	0.471784	0.474898	0.088542	NA	NA
16	16291971	C	T	rs9940825	ABCC6	single nucleotide variant	NM_001171.5(ABCC6):c.1245G>A (p.Val415=)	Pseudoxanthoma elasticum	WestEurasia	0.205151	0.113627	0.55387	Pathogenic	T	0.248682	0.212543	0.102658	0.318778	0.285744	0.0625	NA	NA
17	32579788	A	G	rs1024611	CCL2	single nucleotide variant	NG_012123.1:g.2493A>G	Coronary artery disease, development of, in hiv;Coronary artery disease, modifier of;Mycobacterium tuberculosis, susceptibility to;Spina bifida, susceptibility to	America	0.400439	0.207685	0.518643	Pathogenic,_risk_factor	G	0.213972	0.322061	0.518927	0.292104	0.608124	0.451637	0.473159	0.323529
6	151936677	G	A	rs6929137	CCDC170	single nucleotide variant	NM_025059.3(CCDC170):c.1810G>A (p.Val604Ile)	Estrogen resistance	Oceania	0.343952	0.173905	0.505608	Likely_pathogenic	A	0.486756	0.32416	0.32136	0.340882	0.14436	0.408681	0.207562	0.517857
8	11617240	A	T	rs12458	GATA4	single nucleotide variant	NM_002052.4(GATA4):c.*1256A>T	Congenital heart disease	SoutheastAsia	0.411706	0.145586	0.353616	Pathogenic	T	0.393282	0.40941	0.466342	0.321309	0.3226	0.557292	NA	NA
11	18290859	C	T	rs1136743	SAA1	single nucleotide variant	NM_000331.5(SAA1):c.209C>T (p.Ala70Val)	Serum amyloid a variant	WestEurasia	0.383183	0.127948	0.333908	Pathogenic	T	0.509687	0.410167	0.256467	0.511131	0.434563	0.177083	NA	NA
1	198796120	C	T	rs12406470	MIR181A1HG	single nucleotide variant	NR_040073.1(MIR181A1HG):n.364-18748G>A	Acute myeloid leukemia with maturation	SouthAsia	0.537678	0.16086	0.299175	Pathogenic	T	0.27184	0.698538	0.627562	0.558285	0.611512	0.458333	NA	NA
1	198776931	C	A	rs9660525	-	single nucleotide variant	NC_000001.11:g.198807802C>A	Acute myeloid leukemia with maturation	SouthAsia	0.489608	0.131504	0.26859	Pathogenic	A	0.286885	0.621112	0.59697	0.431589	0.547964	0.453125	NA	NA
4	187158034	G	A	rs3733402	KLKB1	single nucleotide variant	NM_000892.4(KLKB1):c.428G>A (p.Ser143Asn)	Prekallikrein deficiency	Africa	0.60471	0.156549	0.258883	Pathogenic	A	0.761259	0.385743	0.619308	0.512776	0.604381	0.744792	NA	NA
16	16291858	G	C	rs12929920	ABCC6	single nucleotide variant	NM_001171.5(ABCC6):c.1338+20C>G	Pseudoxanthoma elasticum	SoutheastAsia	0.787754	0.160163	0.203316	Pathogenic	C	0.506291	0.811337	0.890047	0.749106	0.821827	0.947917	NA	NA
1	198869514	T	C	rs10800598	MIR181A1HG	single nucleotide variant	NR_040073.1(MIR181A1HG):n.363+26A>G	Acute myeloid leukemia with maturation	SoutheastAsia	0.840027	0.133931	0.159437	Pathogenic	C	0.903726	0.88428	0.851067	0.666938	0.760192	0.973958	NA	NA
1	198868084	G	A	rs10800597	MIR181A1HG	single nucleotide variant	NR_040073.1(MIR181A1HG):n.363+1456C>T	Acute myeloid leukemia with maturation	SoutheastAsia	0.817718	0.130199	0.159222	Pathogenic	A	0.843942	0.884974	0.807484	0.665835	0.756155	0.947917	NA	NA
4	6295693	C	G	rs6446482	WFS1	single nucleotide variant	NM_006005.3(WFS1):c.713-1075C>G	Diabetes mellitus, noninsulin-dependent, association with	EastAsia	0.743214	0.116764	0.157107	Pathogenic	G	0.669101	0.742774	0.859978	0.626135	0.712336	0.848958	NA	NA
1	198867678	G	T	rs60639710	MIR181A1HG	single nucleotide variant	NR_040073.1(MIR181A1HG):n.363+1862C>A	Acute myeloid leukemia with maturation	SoutheastAsia	0.817526	0.127786	0.156308	Pathogenic	T	0.843637	0.885942	0.808236	0.666105	0.755922	0.945312	NA	NA
16	16291871	G	C	rs9940089	ABCC6	single nucleotide variant	NM_001171.5(ABCC6):c.1338+7C>G	Pseudoxanthoma elasticum	SoutheastAsia	0.82553	0.127595	0.154561	Pathogenic	C	0.673007	0.815857	0.910116	0.761109	0.839964	0.953125	NA	NA
8	11606312	T	C	rs3735819	GATA4	single nucleotide variant	NM_002052.4(GATA4):c.617-116T>C	Congenital heart disease	SoutheastAsia	0.880878	0.106101	0.120449	Pathogenic	C	0.928849	0.904807	0.945747	0.71408	0.804806	0.986979	NA	NA

## Sheet: Sheet2
	rsid		rs2814778
rs	2814778		rs671
rs	671		rs41469351
rs	41469351		rs11891778
rs	11891778		rs78838117
rs	78838117		rs28919570
rs	28919570		rs61199332
rs	61199332		rs2856585
rs	2856585		rs6256
rs	6256		rs1566734
rs	1566734		rs2238472
rs	2238472		rs9924755
rs	9924755		rs745379
rs	745379		rs1064039
rs	1064039		rs12156163
rs	12156163		rs8058694
rs	8058694		rs12931472
rs	12931472		rs4895441
rs	4895441		rs11085825
rs	11085825		rs804290
rs	804290		rs1800450
rs	1800450		rs10509305
rs	10509305		rs11886868
rs	11886868		rs12948217
rs	12948217		rs10065172
rs	10065172		rs2046210
rs	2046210		rs8058696
rs	8058696		rs9940825
rs	9940825		rs1024611
rs	1024611		rs6929137
rs	6929137		rs12458
rs	12458		rs1136743
rs	1136743		rs12406470
rs	12406470		rs9660525
rs	9660525		rs3733402
rs	3733402		rs12929920
rs	12929920		rs10800598
rs	10800598		rs10800597
rs	10800597		rs6446482
rs	6446482		rs60639710
rs	60639710		rs9940089
rs	9940089
rs	3735819
